# Supplementary material
Source: publisher figshare collection journal article supplement (https://acs.figshare.com/ndownloader/files/9246442)
Supplement: Supplementary file 1 [file 9246442]

data_7
_audit_creation_date              2016-09-01
_audit_creation_method
;
Olex2 1.2
(compiled 2016.08.25 svn.r3337 for OlexSys, GUI svn.r5221)
;
_shelxl_version_number            2013-4
_publ_contact_author_address      ?
_publ_contact_author_email        ?
_publ_contact_author_name         ''
_publ_contact_author_phone        ?
_publ_section_references
;
Bourhis, L.J., Dolomanov, O.V., Gildea, R.J., Howard, J.A.K., Puschmann, H.
 (2015). Acta Cryst. A71, 59-75.

Dolomanov, O.V., Bourhis, L.J., Gildea, R.J, Howard, J.A.K. & Puschmann, H.
 (2009), J. Appl. Cryst. 42, 339-341.

Sheldrick, G.M. (2015). Acta Cryst. C71, 3-8.
;
_chemical_name_common             ?
_chemical_name_systematic
;
 ?
;
_chemical_formula_moiety          'C13 H13 Au Cl2 F N'
_chemical_formula_sum             'C13 H13 Au Cl2 F N'
_chemical_formula_weight          470.11
_chemical_melting_point           ?
loop_
  _atom_type_symbol
  _atom_type_description
  _atom_type_scat_dispersion_real
  _atom_type_scat_dispersion_imag
  _atom_type_scat_source
 'C' 'C' 0.0033 0.0016 'International Tables Vol C Tables 4.2.6.8 and 6.1.1.4'
 'H' 'H' 0.0000 0.0000 'International Tables Vol C Tables 4.2.6.8 and 6.1.1.4'
 'Au' 'Au' -2.0133 8.8022
 'International Tables Vol C Tables 4.2.6.8 and 6.1.1.4'
 'Cl' 'Cl' 0.1484 0.1585 'International Tables Vol C Tables 4.2.6.8 and 6.1.1.4'
 'F' 'F' 0.0171 0.0103 'International Tables Vol C Tables 4.2.6.8 and 6.1.1.4'
 'N' 'N' 0.0061 0.0033 'International Tables Vol C Tables 4.2.6.8 and 6.1.1.4'

_shelx_space_group_comment
;
The symmetry employed for this shelxl refinement is uniquely defined
by the following loop, which should always be used as a source of
symmetry information in preference to the above space-group names.
They are only intended as comments.
;
_space_group_crystal_system       'monoclinic'
_space_group_IT_number            14
_space_group_name_H-M_alt         'P 1 21/n 1'
_space_group_name_Hall            '-P 2yn'
loop_
  _space_group_symop_operation_xyz
 'x, y, z'
 '-x+1/2, y+1/2, -z+1/2'
 '-x, -y, -z'
 'x-1/2, -y-1/2, z-1/2'

_cell_length_a                    14.7841(3)
_cell_length_b                    14.3018(2)
_cell_length_c                    15.1278(3)
_cell_angle_alpha                 90
_cell_angle_beta                  117.4497(8)
_cell_angle_gamma                 90
_cell_volume                      2838.50(9)
_cell_formula_units_Z             8
_cell_measurement_reflns_used     7975
_cell_measurement_temperature     100(2)
_cell_measurement_theta_max       27.94
_cell_measurement_theta_min       2.85
_shelx_estimated_absorpt_T_max    ?
_shelx_estimated_absorpt_T_min    ?
_exptl_absorpt_coefficient_mu     10.734
_exptl_absorpt_correction_T_max   0.7456
_exptl_absorpt_correction_T_min   0.4288
_exptl_absorpt_correction_type    multi-scan
_exptl_absorpt_process_details
;
SADABS-2014/5 (Bruker,2014/5) was used for absorption correction.
wR2(int) was 0.0964 before and 0.0418 after correction.
The Ratio of minimum to maximum transmission is 0.5751.
The \l/2 correction factor is Not present.
;
_exptl_crystal_colour             colourless
_exptl_crystal_colour_primary     colourless
_exptl_crystal_density_diffrn     2.200
_exptl_crystal_density_meas       ?
_exptl_crystal_density_method     ?
_exptl_crystal_description        block
_exptl_crystal_F_000              1760
_exptl_crystal_size_max           0.285
_exptl_crystal_size_mid           0.148
_exptl_crystal_size_min           0.114
_exptl_special_details
;
 ?
;
_exptl_transmission_factor_max    ?
_exptl_transmission_factor_min    ?
_diffrn_reflns_av_R_equivalents   0.0315
_diffrn_reflns_av_unetI/netI      0.0291
_diffrn_reflns_Laue_measured_fraction_full 0.999
_diffrn_reflns_Laue_measured_fraction_max 0.998
_diffrn_reflns_limit_h_max        19
_diffrn_reflns_limit_h_min        -15
_diffrn_reflns_limit_k_max        18
_diffrn_reflns_limit_k_min        -18
_diffrn_reflns_limit_l_max        18
_diffrn_reflns_limit_l_min        -19
_diffrn_reflns_number             25671
_diffrn_reflns_point_group_measured_fraction_full 0.999
_diffrn_reflns_point_group_measured_fraction_max 0.998
_diffrn_reflns_theta_full         26.000
_diffrn_reflns_theta_max          27.960
_diffrn_reflns_theta_min          1.594
_diffrn_ambient_temperature       100(2)
_diffrn_detector                  'Bruker area detector'
_diffrn_detector_area_resol_mean  ?
_diffrn_detector_type             'CCD area detector'
_diffrn_measured_fraction_theta_full 0.999
_diffrn_measured_fraction_theta_max 0.998
_diffrn_measurement_device        'Bruker Apex II kappa CCD area detector'
_diffrn_measurement_device_type   'Bruker Apex II kappa CCD area detector'
_diffrn_measurement_method        '\f and \w scans'
_diffrn_radiation_monochromator   graphite
_diffrn_radiation_type            MoK\a
_diffrn_radiation_wavelength      0.71073
_diffrn_source                    'fine-focus sealed tube'
_diffrn_standards_number          0
_reflns_Friedel_coverage          0.000
_reflns_Friedel_fraction_full     .
_reflns_Friedel_fraction_max      .
_reflns_number_gt                 5417
_reflns_number_total              6818
_reflns_special_details
;
 Reflections were merged by SHELXL according to the crystal
 class for the calculation of statistics and refinement.
 
 _reflns_Friedel_fraction is defined as the number of unique
 Friedel pairs measured divided by the number that would be
 possible theoretically, ignoring centric projections and
 systematic absences.
;
_reflns_threshold_expression      'I > 2\s(I)'
_computing_cell_refinement        'SAINT v8.37A (Bruker, 2015)'
_computing_data_collection        ?
_computing_data_reduction         'SAINT v8.37A (Bruker, 2015)'
_computing_molecular_graphics     'Olex2 (Dolomanov et al., 2009)'
_computing_publication_material   'Olex2 (Dolomanov et al., 2009)'
_computing_structure_refinement   'ShelXL (Sheldrick, 2015)'
_computing_structure_solution     'olex2.solve (Bourhis et al., 2015)'
_refine_diff_density_max          0.950
_refine_diff_density_min          -1.042
_refine_diff_density_rms          0.140
_refine_ls_extinction_coef        .
_refine_ls_extinction_method      none
_refine_ls_goodness_of_fit_ref    1.028
_refine_ls_hydrogen_treatment     constr
_refine_ls_matrix_type            full
_refine_ls_number_parameters      329
_refine_ls_number_reflns          6818
_refine_ls_number_restraints      0
_refine_ls_R_factor_all           0.0353
_refine_ls_R_factor_gt            0.0237
_refine_ls_restrained_S_all       1.028
_refine_ls_shift/su_max           0.003
_refine_ls_shift/su_mean          0.000
_refine_ls_structure_factor_coef  Fsqd
_refine_ls_weighting_details
'w=1/[\s^2^(Fo^2^)+(0.0210P)^2^+2.5546P] where P=(Fo^2^+2Fc^2^)/3'
_refine_ls_weighting_scheme       calc
_refine_ls_wR_factor_gt           0.0509
_refine_ls_wR_factor_ref          0.0546
_refine_special_details
;
 ?
;
_olex2_refinement_description
;
1. Fixed Uiso
 At 1.2 times of:
  All C(H) groups
 At 1.5 times of:
  All C(H,H,H) groups
2.a Aromatic/amide H refined with riding coordinates:
 C2(H2), C3(H3), C4(H4), C9(H9), C10(H10), C12(H12), C13(H13), C15(H15),
 C16(H16), C17(H17), C22(H22), C23(H23), C25(H25), C26(H26)
2.b Idealised Me refined as rotating group:
 C6(H6A,H6B,H6C), C7(H7A,H7B,H7C), C19(H19A,H19B,H19C), C20(H20A,H20B,H20C)
;
_atom_sites_solution_hydrogens    geom
_atom_sites_solution_primary      iterative
_atom_sites_solution_secondary    ?
loop_
  _atom_site_label
  _atom_site_type_symbol
  _atom_site_fract_x
  _atom_site_fract_y
  _atom_site_fract_z
  _atom_site_U_iso_or_equiv
  _atom_site_adp_type
  _atom_site_occupancy
  _atom_site_site_symmetry_order
  _atom_site_calc_flag
  _atom_site_refinement_flags_posn
  _atom_site_refinement_flags_adp
  _atom_site_refinement_flags_occupancy
  _atom_site_disorder_assembly
  _atom_site_disorder_group
 Au2 Au 0.47172(2) 0.73327(2) 0.30825(2) 0.01192(5) Uani 1 1 d . . . . .
 Cl3 Cl 0.50752(8) 0.75447(7) 0.17874(7) 0.0200(2) Uani 1 1 d . . . . .
 Cl4 Cl 0.43617(7) 0.70745(7) 0.43764(6) 0.01806(18) Uani 1 1 d . . . . .
 F2 F 0.80002(17) 0.43053(16) 0.47994(18) 0.0301(6) Uani 1 1 d . . . . .
 N2 N 0.3614(2) 0.8445(2) 0.2527(2) 0.0128(6) Uani 1 1 d . . . . .
 C14 C 0.2653(3) 0.8283(3) 0.1793(3) 0.0150(8) Uani 1 1 d . . . . .
 C15 C 0.1962(3) 0.9011(3) 0.1410(3) 0.0179(8) Uani 1 1 d . . . . .
 C16 C 0.2261(3) 0.9913(3) 0.1757(3) 0.0208(9) Uani 1 1 d . . . . .
 C17 C 0.3240(3) 1.0059(3) 0.2511(3) 0.0189(8) Uani 1 1 d . . . . .
 C18 C 0.3906(3) 0.9318(3) 0.2900(3) 0.0170(8) Uani 1 1 d . . . . .
 C19 C 0.2390(3) 0.7310(3) 0.1409(3) 0.0207(9) Uani 1 1 d . . . . .
 C20 C 0.4962(3) 0.9447(3) 0.3728(3) 0.0219(9) Uani 1 1 d . . . . .
 C21 C 0.5795(3) 0.6321(3) 0.3621(3) 0.0146(7) Uani 1 1 d . . . . .
 C22 C 0.6799(3) 0.6556(3) 0.3923(3) 0.0179(8) Uani 1 1 d . . . . .
 C23 C 0.7554(3) 0.5878(3) 0.4326(3) 0.0206(8) Uani 1 1 d . . . . .
 C24 C 0.7263(3) 0.4979(3) 0.4396(3) 0.0198(9) Uani 1 1 d . . . . .
 C25 C 0.6270(3) 0.4721(3) 0.4099(3) 0.0180(8) Uani 1 1 d . . . . .
 C26 C 0.5527(3) 0.5413(3) 0.3708(3) 0.0166(8) Uani 1 1 d . . . . .

loop_
  _atom_site_aniso_label
  _atom_site_aniso_U_11
  _atom_site_aniso_U_22
  _atom_site_aniso_U_33
  _atom_site_aniso_U_23
  _atom_site_aniso_U_13
  _atom_site_aniso_U_12
 Au2 0.01191(8) 0.01221(8) 0.01107(7) 0.00025(5) 0.00482(6) 0.00040(5)
 Cl3 0.0245(5) 0.0225(5) 0.0180(4) 0.0027(3) 0.0141(4) 0.0011(4)
 Cl4 0.0213(5) 0.0209(5) 0.0147(4) 0.0027(3) 0.0107(4) 0.0032(4)
 F2 0.0189(12) 0.0203(13) 0.0390(15) -0.0024(10) 0.0032(11) 0.0088(10)
 N2 0.0129(15) 0.0138(16) 0.0116(14) 0.0015(11) 0.0056(12) -0.0006(12)
 C14 0.0127(19) 0.018(2) 0.0137(17) 0.0016(13) 0.0058(15) -0.0006(14)
 C15 0.015(2) 0.019(2) 0.0171(18) 0.0044(14) 0.0057(16) 0.0047(15)
 C16 0.019(2) 0.021(2) 0.024(2) 0.0052(15) 0.0113(17) 0.0066(16)
 C17 0.019(2) 0.015(2) 0.024(2) -0.0031(14) 0.0110(17) -0.0016(15)
 C18 0.018(2) 0.015(2) 0.0211(19) -0.0018(14) 0.0115(16) -0.0016(15)
 C19 0.016(2) 0.019(2) 0.0218(19) 0.0005(15) 0.0043(16) -0.0006(15)
 C20 0.019(2) 0.018(2) 0.025(2) -0.0078(15) 0.0068(17) -0.0038(15)
 C21 0.0174(19) 0.0160(19) 0.0111(16) -0.0001(13) 0.0072(15) 0.0030(14)
 C22 0.018(2) 0.019(2) 0.0176(18) 0.0012(14) 0.0096(16) -0.0022(15)
 C23 0.0129(19) 0.024(2) 0.023(2) -0.0035(15) 0.0065(16) -0.0018(15)
 C24 0.017(2) 0.019(2) 0.0176(19) -0.0041(14) 0.0030(16) 0.0061(15)
 C25 0.018(2) 0.015(2) 0.0174(18) -0.0017(14) 0.0052(16) -0.0001(15)
 C26 0.0140(19) 0.019(2) 0.0146(17) -0.0036(14) 0.0050(15) -0.0027(14)

_geom_special_details
;
 All esds (except the esd in the dihedral angle between two l.s. planes)
 are estimated using the full covariance matrix.  The cell esds are taken
 into account individually in the estimation of esds in distances, angles
 and torsion angles; correlations between esds in cell parameters are only
 used when they are defined by crystal symmetry.  An approximate (isotropic)
 treatment of cell esds is used for estimating esds involving l.s. planes.
;
loop_
  _geom_bond_atom_site_label_1
  _geom_bond_atom_site_label_2
  _geom_bond_distance
  _geom_bond_site_symmetry_2
  _geom_bond_publ_flag
 Au2 Cl3 2.2730(9) . ?
 Au2 Cl4 2.2787(9) . ?
 Au2 N2 2.153(3) . ?
 Au2 C21 2.024(4) . ?
 F2 C24 1.370(4) . ?
 N2 C14 1.360(4) . ?
 N2 C18 1.357(4) . ?
 C14 C15 1.384(5) . ?
 C14 C19 1.489(5) . ?
 C15 C16 1.386(5) . ?
 C16 C17 1.385(5) . ?
 C17 C18 1.380(5) . ?
 C18 C20 1.495(5) . ?
 C21 C22 1.379(5) . ?
 C21 C26 1.381(5) . ?
 C22 C23 1.390(5) . ?
 C23 C24 1.376(6) . ?
 C24 C25 1.373(5) . ?
 C25 C26 1.392(5) . ?

loop_
  _geom_angle_atom_site_label_1
  _geom_angle_atom_site_label_2
  _geom_angle_atom_site_label_3
  _geom_angle
  _geom_angle_site_symmetry_1
  _geom_angle_site_symmetry_3
  _geom_angle_publ_flag
 Cl3 Au2 Cl4 178.34(3) . . ?
 N2 Au2 Cl3 90.02(8) . . ?
 N2 Au2 Cl4 91.26(8) . . ?
 C21 Au2 Cl3 89.41(10) . . ?
 C21 Au2 Cl4 89.34(10) . . ?
 C21 Au2 N2 177.96(13) . . ?
 C14 N2 Au2 120.8(2) . . ?
 C18 N2 Au2 118.6(2) . . ?
 C18 N2 C14 120.6(3) . . ?
 N2 C14 C15 120.3(3) . . ?
 N2 C14 C19 117.6(3) . . ?
 C15 C14 C19 122.0(3) . . ?
 C14 C15 C16 119.8(4) . . ?
 C17 C16 C15 118.8(3) . . ?
 C18 C17 C16 120.4(4) . . ?
 N2 C18 C17 120.1(3) . . ?
 N2 C18 C20 118.1(3) . . ?
 C17 C18 C20 121.8(3) . . ?
 C22 C21 Au2 119.1(3) . . ?
 C22 C21 C26 120.6(3) . . ?
 C26 C21 Au2 120.2(3) . . ?
 C21 C22 C23 120.0(4) . . ?
 C24 C23 C22 118.0(4) . . ?
 F2 C24 C23 118.6(4) . . ?
 F2 C24 C25 117.9(3) . . ?
 C25 C24 C23 123.5(4) . . ?
 C24 C25 C26 117.6(4) . . ?
 C21 C26 C25 120.3(4) . . ?

loop_
  _geom_torsion_atom_site_label_1
  _geom_torsion_atom_site_label_2
  _geom_torsion_atom_site_label_3
  _geom_torsion_atom_site_label_4
  _geom_torsion
  _geom_torsion_site_symmetry_1
  _geom_torsion_site_symmetry_2
  _geom_torsion_site_symmetry_3
  _geom_torsion_site_symmetry_4
  _geom_torsion_publ_flag
 Au2 N2 C14 C15 -177.1(3) . . . . ?
 Au2 N2 C14 C19 1.3(4) . . . . ?
 Au2 N2 C18 C17 175.4(3) . . . . ?
 Au2 N2 C18 C20 -4.1(4) . . . . ?
 Au2 C21 C22 C23 177.9(3) . . . . ?
 Au2 C21 C26 C25 -178.6(3) . . . . ?
 F2 C24 C25 C26 178.7(3) . . . . ?
 N2 C14 C15 C16 1.8(6) . . . . ?
 C14 N2 C18 C17 -2.4(5) . . . . ?
 C14 N2 C18 C20 178.0(3) . . . . ?
 C14 C15 C16 C17 -2.4(6) . . . . ?
 C15 C16 C17 C18 0.7(6) . . . . ?
 C16 C17 C18 N2 1.7(6) . . . . ?
 C16 C17 C18 C20 -178.7(4) . . . . ?
 C18 N2 C14 C15 0.6(5) . . . . ?
 C18 N2 C14 C19 179.1(3) . . . . ?
 C19 C14 C15 C16 -176.6(4) . . . . ?
 C21 C22 C23 C24 1.0(5) . . . . ?
 C22 C21 C26 C25 -0.3(5) . . . . ?
 C22 C23 C24 F2 -179.4(3) . . . . ?
 C22 C23 C24 C25 -0.8(6) . . . . ?
 C23 C24 C25 C26 0.0(6) . . . . ?
 C24 C25 C26 C21 0.5(5) . . . . ?
 C26 C21 C22 C23 -0.5(5) . . . . ?

loop_
  _refln_index_h
  _refln_index_k
  _refln_index_l
  _refln_F_squared_meas
  _refln_F_squared_sigma
 2 0 0 443.58 11.93
 3 0 0 0.07 0.05
 4 0 0 605.29 16.33
 5 0 0 0.08 0.08
 6 0 0 76.91 2.17
 -6 0 0 76.61 2.2
 -7 0 0 0.03 0.08
 7 0 0 -0.12 0.09
 8 0 0 2.37 0.23
 -8 0 0 2.46 0.22
 9 0 0 -0.11 0.12
 10 0 0 14.42 0.61
 11 0 0 -0.08 0.15
 12 0 0 45.9 1.53
 12 0 0 49.1 1.86
 13 0 0 0.05 0.2
 13 0 0 -0.16 0.33
 14 0 0 54.91 1.82
 14 0 0 58.41 2.26
 15 0 0 -0.35 0.42
 16 0 0 34.74 1.77
 17 0 0 -0.04 0.51
 1 -1 0 1.06 0.07
 -1 1 0 0.92 0.12
 2 -1 0 111.61 2.93
 2 1 0 105.99 2.95
 3 -1 0 0.09 0.06
 3 1 0 0.01 0.06
 4 -1 0 399.77 10.67
 4 1 0 400.59 10.78
 5 -1 0 5.32 0.25
 5 1 0 5.61 0.27
 6 -1 0 265.47 7.06
 -6 1 0 246.22 7.21
 6 1 0 273.42 7.09
 7 -1 0 9.84 0.41
 7 1 0 10.33 0.44
 -7 1 0 9.61 0.4
 -8 -1 0 288.44 7.91
 8 -1 0 290.71 7.9
 8 1 0 294.44 7.93
 -8 1 0 294.55 7.9
 9 -1 0 1.49 0.2
 -9 -1 0 1.47 0.23
 9 1 0 1.27 0.21
 10 -1 0 181.69 5.3
 10 -1 0 182.59 5.02
 10 1 0 178.41 5.04
 11 -1 0 2.13 0.41
 11 -1 0 1.84 0.25
 11 1 0 1.72 0.27
 12 -1 0 46.56 1.52
 12 -1 0 48.05 1.85
 12 1 0 46.65 1.55
 13 -1 0 -0.43 0.32
 13 -1 0 0.21 0.19
 13 1 0 0.24 0.21
 13 1 0 -0.34 0.34
 14 -1 0 15.3 1.06
 14 -1 0 15.4 0.73
 14 1 0 15.8 0.77
 14 1 0 17.2 1.13
 15 -1 0 0.24 0.44
 15 1 0 -0.13 0.43
 16 -1 0 0.37 0.49
 16 1 0 0.01 0.49
 17 -1 0 -0.36 0.49
 17 1 0 -0.37 0.5
 0 -2 0 478.05 12.78
 0 2 0 456.21 12.84
 0 2 0 499.3 12.79
 -1 -2 0 36.02 1.08
 1 -2 0 35.82 1.03
 1 -2 0 36.33 1.07
 1 2 0 36.84 1.1
 -1 2 0 35.85 1.1
 -1 2 0 37.66 1.11
 2 -2 0 832.5 22.23
 2 -2 0 797.35 22.16
 -2 -2 0 803.8 22.3
 2 2 0 849.2 22.41
 3 -2 0 0.49 0.08
 3 -2 0 0.48 0.11
 -3 -2 0 0.65 0.11
 3 2 0 0.43 0.11
 4 -2 0 332.6 9.1
 4 -2 0 350.68 9.03
 -4 -2 0 330.49 9.05
 4 2 0 335.25 9.07
 5 -2 0 0.66 0.16
 -5 -2 0 0.51 0.11
 5 -2 0 0.54 0.1
 -5 2 0 0.57 0.12
 5 2 0 0.69 0.14
 6 -2 0 53.85 1.54
 -6 -2 0 52.22 1.57
 6 -2 0 51.64 1.67
 6 2 0 52.44 1.59
 -6 2 0 55.3 1.55
 7 -2 0 2.93 0.32
 7 -2 0 3 0.22
 -7 -2 0 3.49 0.25
 -7 2 0 3.59 0.23
 7 2 0 3.31 0.28
 8 -2 0 1.64 0.19
 -8 -2 0 1.72 0.21
 8 -2 0 1.82 0.29
 8 2 0 1.74 0.22
 -8 2 0 2.17 0.21
 9 -2 0 1.01 0.18
 -9 -2 0 1.19 0.19
 9 -2 0 1.03 0.28
 9 2 0 1.31 0.23
 10 -2 0 35.06 1.38
 10 -2 0 37 1.17
 10 2 0 34.25 1.21
 11 -2 0 1.6 0.38
 11 -2 0 1.82 0.24
 11 2 0 1.97 0.29
 12 -2 0 19.91 1.07
 12 -2 0 20.81 0.82
 12 2 0 21.92 0.9
 13 -2 0 0.55 0.37
 13 -2 0 0.64 0.21
 13 2 0 0.42 0.25
 14 -2 0 57.77 1.83
 14 -2 0 57.95 2.21
 14 2 0 55.84 2.28
 14 2 0 56.25 1.91
 15 -2 0 0.96 0.49
 15 2 0 0.63 0.5
 15 2 0 0.6 0.32
 16 -2 0 56.25 2.28
 16 2 0 48.7 2.25
 17 -2 0 0.66 0.56
 17 2 0 -0.48 0.44
 0 -3 0 0.68 0.15
 0 3 0 0.54 0.18
 1 -3 0 8.32 0.39
 1 -3 0 9.24 0.34
 -1 -3 0 9.39 0.43
 -1 3 0 9.19 0.41
 1 3 0 8.93 0.46
 -1 3 0 9.68 0.47
 -2 -3 0 131.59 3.58
 2 -3 0 126.59 3.51
 2 -3 0 124.57 3.53
 -2 3 0 131.19 3.61
 -2 3 0 128.34 3.54
 2 3 0 127.73 3.59
 3 -3 0 1.59 0.16
 3 -3 0 1.57 0.16
 -3 -3 0 1.72 0.19
 -3 3 0 1.7 0.17
 3 3 0 2.36 0.23
 4 -3 0 235.45 6.52
 -4 -3 0 237.41 6.51
 4 -3 0 240.37 6.46
 4 3 0 233.05 6.52
 -4 3 0 250.1 6.48
 -5 -3 0 0.09 0.1
 5 -3 0 0.07 0.11
 5 -3 0 0.24 0.1
 5 3 0 -0.04 0.11
 -5 3 0 0.29 0.1
 6 -3 0 480.36 12.54
 -6 -3 0 461.74 12.59
 6 -3 0 463.93 12.65
 6 3 0 456.45 12.6
 -6 3 0 476.56 12.54
 7 -3 0 3.6 0.35
 7 -3 0 3.21 0.24
 -7 -3 0 3.86 0.28
 7 3 0 3.48 0.31
 -7 3 0 3.46 0.25
 8 -3 0 215.6 5.84
 8 -3 0 209.42 6.02
 -8 -3 0 210.45 5.9
 8 3 0 214.74 5.93
 -8 3 0 217.97 5.84
 9 -3 0 7.98 0.56
 9 -3 0 8.5 0.42
 -9 -3 0 8.73 0.47
 9 3 0 8.26 0.5
 10 -3 0 104.23 3.2
 10 -3 0 104.17 2.94
 10 3 0 99.32 3.03
 11 -3 0 4.88 0.53
 11 -3 0 5.94 0.4
 11 3 0 6.58 0.52
 12 -3 0 59.99 1.87
 12 -3 0 61.69 2.18
 12 3 0 59.26 1.98
 13 -3 0 1.96 0.28
 13 -3 0 1.53 0.42
 13 3 0 1.67 0.35
 14 -3 0 7.34 0.78
 14 -3 0 6.22 0.47
 14 3 0 6.14 0.6
 15 -3 0 0.03 0.42
 15 3 0 0.63 0.53
 15 3 0 0.19 0.32
 16 -3 0 1.07 0.57
 16 3 0 2.45 0.68
 17 -3 0 0.53 0.49
 17 3 0 0.59 0.56
 0 -4 0 842.25 23.42
 0 4 0 842.39 23.47
 0 4 0 888.23 22.99
 1 -4 0 1.31 0.21
 -1 -4 0 1.61 0.23
 1 4 0 2.12 0.28
 -1 4 0 1.73 0.3
 -1 4 0 1.67 0.25
 -2 -4 0 547.08 14.55
 2 -4 0 515.88 14.59
 2 -4 0 535.05 14.51
 -2 4 0 544.09 14.59
 -2 4 0 540.76 14.51
 2 4 0 559.02 14.58
 -3 -4 0 16.69 0.67
 3 -4 0 16.96 0.61
 3 -4 0 17.29 0.63
 -3 4 0 16.82 0.63
 -3 4 0 17.75 0.71
 3 4 0 16.71 0.7
 -4 -4 0 359.89 9.88
 4 -4 0 367.43 9.85
 4 -4 0 362.16 9.82
 -4 4 0 368.78 9.83
 4 4 0 364.86 9.91
 5 -4 0 19.37 0.71
 5 -4 0 21.07 0.77
 -5 -4 0 21 0.78
 -5 4 0 20.74 0.72
 5 4 0 20.84 0.8
 6 -4 0 67.98 2.12
 -6 -4 0 68.7 2.1
 6 -4 0 68.31 2.04
 -6 4 0 69.93 2.04
 6 4 0 76.06 2.15
 -7 -4 0 0.19 0.15
 7 -4 0 0.34 0.17
 7 -4 0 0.27 0.13
 -7 4 0 0.28 0.12
 7 4 0 0.58 0.2
 8 -4 0 2.42 0.32
 -8 -4 0 2.55 0.3
 8 -4 0 2.26 0.24
 8 4 0 1.84 0.3
 -8 4 0 2.27 0.24
 -9 -4 0 3.11 0.34
 9 -4 0 3.25 0.29
 9 -4 0 2.68 0.37
 9 4 0 2.7 0.36
 10 -4 0 7.58 0.58
 10 -4 0 6.11 0.4
 10 4 0 8.16 0.56
 11 -4 0 -0.17 0.16
 11 -4 0 -0.07 0.24
 11 4 0 -0.02 0.24
 12 -4 0 49.62 1.9
 12 -4 0 50.75 1.62
 12 4 0 51.76 1.78
 13 -4 0 -0.1 0.18
 13 -4 0 -0.15 0.31
 13 4 0 -0.03 0.27
 14 -4 0 48.85 1.97
 14 -4 0 47.22 1.6
 14 4 0 50.13 1.8
 15 -4 0 -0.57 0.35
 15 4 0 -0.18 0.34
 16 -4 0 51.51 2.16
 16 4 0 48.23 2.24
 0 -5 0 0.18 0.16
 0 5 0 0.36 0.27
 0 5 0 0.12 0.19
 -1 -5 0 6.48 0.44
 1 -5 0 6.84 0.44
 1 5 0 6.45 0.48
 -1 5 0 6.13 0.49
 -1 5 0 6.65 0.53
 2 -5 0 49.35 1.51
 -2 -5 0 52.61 1.67
 2 -5 0 52.77 1.64
 -2 -5 0 45.28 1.59
 2 5 0 52.48 1.7
 -2 5 0 54.48 1.66
 -2 5 0 52.22 1.74
 3 -5 0 1 0.17
 3 -5 0 0.79 0.18
 -3 -5 0 0.92 0.2
 3 5 0 0.98 0.23
 -3 5 0 0.71 0.22
 -3 5 0 1.07 0.2
 4 -5 0 285.52 7.8
 4 -5 0 284.92 7.79
 -4 -5 0 278.61 7.87
 4 5 0 292.06 7.91
 -4 5 0 284.58 7.93
 -4 5 0 291.56 7.82
 -5 -5 0 1.72 0.26
 5 -5 0 2.56 0.25
 5 -5 0 2.05 0.25
 5 5 0 1.58 0.28
 -5 5 0 1.92 0.23
 6 -5 0 148.25 4.17
 -6 -5 0 146.95 4.26
 6 -5 0 150.64 4.24
 6 5 0 147.23 4.29
 -6 5 0 153.17 4.18
 7 -5 0 6.93 0.46
 -7 -5 0 7.2 0.46
 7 -5 0 6.27 0.38
 -7 5 0 6.62 0.39
 7 5 0 7.6 0.51
 -8 -5 0 194.1 5.57
 8 -5 0 201.83 5.47
 8 -5 0 191.82 5.6
 -8 5 0 198.87 5.47
 8 5 0 200.41 5.61
 -9 -5 0 0.89 0.24
 9 -5 0 0.7 0.19
 9 -5 0 0.6 0.25
 9 5 0 0.51 0.26
 10 -5 0 92.14 2.94
 10 -5 0 92.68 2.74
 10 5 0 96.04 2.92
 11 -5 0 5.68 0.59
 11 -5 0 5.1 0.39
 11 5 0 5.45 0.56
 12 -5 0 66.45 2.02
 12 -5 0 63.53 2.28
 12 5 0 64.72 2.21
 13 -5 0 -0.14 0.18
 13 -5 0 -0.42 0.28
 13 5 0 0.06 0.33
 14 -5 0 11.97 0.65
 14 -5 0 12.52 0.94
 14 5 0 14.06 0.9
 15 -5 0 -0.51 0.35
 15 5 0 -0.02 0.39
 16 -5 0 0.86 0.51
 16 5 0 0.15 0.54
 0 -6 0 387.69 10.84
 0 6 0 403.43 11.08
 0 6 0 394.86 10.87
 1 -6 0 25.74 1.05
 -1 -6 0 28.09 1.1
 -1 6 0 27.43 1.22
 -1 6 0 28.02 1.1
 1 6 0 29.93 1.15
 2 -6 0 386.76 10.49
 -2 -6 0 376.64 10.52
 -2 6 0 382.18 10.62
 -2 6 0 380.8 10.49
 2 6 0 386.51 10.56
 3 -6 0 1.07 0.18
 3 -6 0 1.09 0.24
 -3 -6 0 1.47 0.29
 -3 6 0 0.99 0.28
 3 6 0 1.73 0.33
 -3 6 0 1.36 0.26
 4 -6 0 211.06 5.87
 4 -6 0 217.89 5.94
 -4 -6 0 212.52 6.01
 -4 6 0 213.79 5.94
 4 6 0 207.51 6.03
 -4 6 0 213.58 6.07
 -5 -6 0 5.89 0.44
 5 -6 0 5.31 0.39
 5 -6 0 6.24 0.38
 5 6 0 6.98 0.53
 -5 6 0 5.22 0.49
 -5 6 0 5.5 0.39
 6 -6 0 46.13 1.47
 -6 -6 0 43.88 1.55
 6 -6 0 46.57 1.5
 6 6 0 43.79 1.59
 -6 6 0 44.12 1.62
 -6 6 0 46.3 1.48
 -7 -6 0 3.65 0.4
 7 -6 0 4.08 0.41
 7 -6 0 3.87 0.34
 7 6 0 4.39 0.48
 -7 6 0 3.94 0.36
 8 -6 0 0.78 0.25
 -8 -6 0 0.57 0.23
 8 -6 0 0.76 0.21
 -8 6 0 0.88 0.36
 8 6 0 0.93 0.32
 9 -6 0 0.25 0.23
 9 -6 0 -0.1 0.17
 -9 -6 0 -0.01 0.2
 9 6 0 -0.08 0.27
 10 -6 0 8.72 0.5
 10 -6 0 8.8 0.63
 10 6 0 8.91 0.68
 11 -6 0 0.14 0.19
 11 -6 0 0.4 0.27
 11 6 0 -0.14 0.31
 12 -6 0 34.53 1.17
 12 -6 0 28.32 1.34
 12 6 0 29.95 1.38
 13 -6 0 0.35 0.22
 13 -6 0 -0.11 0.3
 13 6 0 -0.08 0.38
 14 -6 0 50.67 2.02
 14 -6 0 49.45 1.68
 14 6 0 52.25 1.99
 15 -6 0 0.81 0.43
 15 6 0 0.92 0.5
 16 -6 0 34.55 1.69
 16 6 0 35.4 1.68
 0 -7 0 0.45 0.2
 0 7 0 0.21 0.25
 1 -7 0 1.39 0.29
 -1 -7 0 2.02 0.32
 -1 7 0 2.02 0.42
 -1 7 0 1.75 0.34
 1 7 0 2.04 0.35
 2 -7 0 33.07 1.31
 -2 -7 0 34.72 1.34
 2 7 0 36.4 1.39
 -2 7 0 34.17 1.46
 -2 7 0 36.74 1.36
 3 -7 0 1.19 0.25
 -3 -7 0 1.3 0.27
 3 7 0 1.65 0.35
 -3 7 0 1.45 0.29
 -3 7 0 1.16 0.31
 4 -7 0 90.94 2.79
 -4 -7 0 94.76 2.87
 4 -7 0 88.61 2.67
 -4 7 0 94.06 2.94
 -4 7 0 91.38 2.8
 4 7 0 88.95 2.89
 5 -7 0 1.5 0.25
 -5 -7 0 1.27 0.29
 5 -7 0 1.59 0.27
 -5 7 0 1.71 0.3
 5 7 0 1.66 0.36
 -5 7 0 1.55 0.33
 6 -7 0 181.97 5.13
 6 -7 0 176.21 5.12
 -6 -7 0 181.61 5.25
 -6 7 0 182.04 5.14
 -6 7 0 185.43 5.34
 6 7 0 179.96 5.29
 -7 -7 0 0.1 0.22
 7 -7 0 0.16 0.19
 7 -7 0 0.21 0.2
 -7 7 0 -0.01 0.22
 -7 7 0 0.06 0.18
 7 7 0 -0.01 0.29
 -8 -7 0 129.14 4
 8 -7 0 135.46 3.87
 8 -7 0 134.1 3.95
 -8 7 0 139.41 4.14
 8 7 0 130.69 4.06
 -9 -7 0 15.56 0.96
 9 -7 0 16.43 0.82
 9 -7 0 15.34 0.72
 -9 7 0 15.21 0.92
 9 7 0 16.01 0.92
 10 -7 0 60.55 2.1
 10 -7 0 61.35 1.96
 10 7 0 63.38 2.21
 11 -7 0 2.02 0.4
 11 -7 0 1.64 0.29
 11 7 0 1.1 0.44
 12 -7 0 36.94 1.34
 12 -7 0 38.99 1.57
 12 7 0 38.1 1.63
 13 -7 0 0.53 0.36
 13 -7 0 0.44 0.24
 13 7 0 0.36 0.45
 14 -7 0 6.44 0.53
 14 -7 0 7.5 0.8
 14 7 0 8.74 0.85
 15 -7 0 -0.21 0.38
 15 7 0 0.07 0.48
 16 -7 0 -0.05 0.43
 16 7 0 -0.34 0.51
 0 -8 0 253.18 7.18
 0 8 0 251.22 7.21
 -1 -8 0 3.86 0.47
 1 -8 0 2.62 0.4
 -1 8 0 3.2 0.52
 1 8 0 2.92 0.49
 -1 8 0 3.19 0.47
 -2 -8 0 140.43 4.21
 2 -8 0 138.41 4.2
 -2 8 0 137.44 4.39
 2 8 0 141.34 4.26
 -2 8 0 143.28 4.23
 3 -8 0 11.57 0.68
 -3 -8 0 12.42 0.73
 3 8 0 11.18 0.76
 -3 8 0 12.06 0.72
 -3 8 0 12.4 0.83
 -4 -8 0 108.11 3.31
 4 -8 0 100.58 3.06
 4 -8 0 106.11 3.24
 4 8 0 105.34 3.35
 -4 8 0 106.02 3.4
 -4 8 0 105.87 3.25
 -5 -8 0 12.07 0.76
 5 -8 0 13.56 0.72
 5 -8 0 13.48 0.63
 5 8 0 12.19 0.84
 -5 8 0 13.28 0.74
 -5 8 0 11.92 0.83
 -6 -8 0 21.12 1.04
 6 -8 0 24.66 1
 6 -8 0 23.47 0.93
 -6 8 0 22.83 1.13
 6 8 0 19.71 1.09
 -6 8 0 21.26 0.97
 -7 -8 0 1.73 0.36
 7 -8 0 1.75 0.32
 7 -8 0 1.94 0.33
 -7 8 0 1.65 0.32
 7 8 0 1.84 0.45
 -7 8 0 1.46 0.42
 8 -8 0 5.58 0.48
 8 -8 0 5.56 0.51
 -8 -8 0 5.54 0.6
 -8 8 0 3.81 0.54
 8 8 0 4.7 0.63
 9 -8 0 3.87 0.48
 9 -8 0 3.51 0.41
 -9 8 0 3.97 0.59
 9 8 0 3.39 0.57
 10 -8 0 12.07 0.76
 10 -8 0 11.84 0.67
 10 8 0 12.71 0.92
 -10 8 0 12.25 0.91
 11 -8 0 0.13 0.24
 11 -8 0 0.19 0.3
 -11 8 0 0.15 0.35
 11 8 0 -0.02 0.42
 12 -8 0 18.41 1.06
 12 -8 0 18.95 0.88
 -12 8 0 21.68 1.23
 12 8 0 19.29 1.19
 13 -8 0 0.27 0.37
 13 -8 0 0.3 0.26
 13 8 0 0.38 0.48
 -13 8 0 0.13 0.4
 14 -8 0 27.2 1.14
 14 -8 0 28.2 1.41
 -14 8 0 30.27 1.58
 14 8 0 30.2 1.54
 15 -8 0 2 0.55
 15 8 0 2.71 0.7
 -15 8 0 2.36 0.63
 0 -9 0 0.31 0.24
 0 9 0 0.48 0.31
 -1 -9 0 7.37 0.67
 1 -9 0 5.26 0.55
 1 9 0 6.46 0.69
 -1 9 0 5.5 0.59
 -1 9 0 7.23 0.84
 -2 -9 0 20.54 1.02
 2 -9 0 21.11 1.06
 -2 9 0 22.52 1.12
 -2 9 0 21.81 1.21
 2 9 0 22.45 1.11
 3 -9 0 0.4 0.28
 -3 -9 0 0.24 0.26
 -3 9 0 0.92 0.36
 3 9 0 0.2 0.37
 -3 9 0 0.31 0.37
 -4 -9 0 44.24 1.73
 4 -9 0 45.63 1.71
 -4 9 0 47.09 1.9
 4 9 0 46.02 1.81
 -4 9 0 46.24 1.73
 5 -9 0 0.33 0.2
 -5 -9 0 0.16 0.27
 5 -9 0 0.33 0.27
 5 9 0 0.46 0.39
 -5 9 0 -0.09 0.33
 -5 9 0 -0.23 0.24
 -6 -9 0 63.57 2.25
 6 -9 0 65.38 2.16
 6 -9 0 61.44 2.03
 -6 9 0 62.56 2.16
 -6 9 0 65.07 2.37
 6 9 0 61.85 2.29
 -7 -9 0 3.82 0.5
 7 -9 0 4.51 0.46
 7 -9 0 4.46 0.49
 -7 9 0 4.38 0.6
 7 9 0 3.28 0.56
 -7 9 0 5.03 0.53
 8 -9 0 105.4 3.2
 -8 -9 0 102.57 3.36
 8 -9 0 105.19 3.21
 -8 9 0 102.34 3.46
 8 9 0 102.85 3.43
 9 -9 0 0.36 0.26
 9 -9 0 0.68 0.3
 -9 9 0 0.72 0.38
 9 9 0 0.72 0.46
 10 -9 0 62.03 2.09
 10 -9 0 60.77 2.18
 10 9 0 64.94 2.4
 -10 9 0 63.96 2.41
 11 -9 0 2.7 0.41
 11 -9 0 3.14 0.48
 -11 9 0 2.22 0.56
 11 9 0 3.19 0.67
 12 -9 0 29.01 1.21
 12 -9 0 31.78 1.41
 -12 9 0 29.77 1.55
 12 9 0 28.81 1.53
 13 -9 0 -0.03 0.36
 13 -9 0 0.42 0.29
 -13 9 0 0.16 0.44
 13 9 0 0.82 0.57
 14 -9 0 3.74 0.46
 14 -9 0 2.65 0.56
 14 9 0 3.43 0.75
 -14 9 0 2.67 0.65
 15 -9 0 -0.01 0.42
 15 9 0 -0.18 0.55
 -15 9 0 0.02 0.49
 0 -10 0 140.14 4.31
 0 10 0 140.66 4.37
 -1 -10 0 3.98 0.53
 1 -10 0 2.61 0.47
 1 10 0 3.58 0.6
 -1 10 0 3.14 0.56
 -2 -10 0 102.25 3.36
 2 -10 0 105.97 3.4
 -2 10 0 107.2 3.65
 2 10 0 105.46 3.44
 -2 10 0 105.83 3.44
 3 -10 0 1.85 0.39
 -3 -10 0 2.86 0.46
 3 10 0 2.14 0.49
 -3 10 0 2.07 0.44
 -3 10 0 2.28 0.55
 4 -10 0 45.47 1.81
 -4 -10 0 44.21 1.81
 4 10 0 51.98 1.96
 -4 10 0 50.15 2.03
 -4 10 0 46.4 1.84
 5 -10 0 3.28 0.49
 -5 -10 0 4.15 0.57
 5 10 0 5.25 0.69
 -5 10 0 3.96 0.54
 -5 10 0 4.37 0.67
 -6 -10 0 15.76 0.99
 6 -10 0 16.18 0.81
 6 -10 0 18.3 0.96
 -6 10 0 18.74 0.99
 -6 10 0 15.89 1.11
 6 10 0 16.07 1.09
 7 -10 0 2.93 0.45
 7 -10 0 2.4 0.38
 -7 -10 0 3.8 0.56
 -7 10 0 2.99 0.6
 7 10 0 2.04 0.55
 -8 -10 0 1.16 0.42
 8 -10 0 0.98 0.32
 8 -10 0 1.67 0.39
 -8 10 0 1.44 0.45
 8 10 0 1.5 0.55
 9 -10 0 0.55 0.32
 9 -10 0 0.98 0.34
 -9 10 0 0.62 0.44
 9 10 0 0.79 0.51
 10 -10 0 5.33 0.6
 10 -10 0 5.15 0.55
 -10 10 0 6.36 0.79
 10 10 0 5.07 0.77
 11 -10 0 0.36 0.35
 11 -10 0 0.53 0.32
 -11 10 0 0.29 0.47
 11 10 0 0.2 0.51
 12 -10 0 16.03 0.88
 12 -10 0 17.39 1.05
 12 10 0 15.7 1.24
 -12 10 0 15.46 1.19
 13 -10 0 1.67 0.52
 13 -10 0 1.67 0.38
 13 10 0 0.62 0.56
 -13 10 0 0.96 0.53
 14 -10 0 18.99 0.96
 -14 10 0 18.44 1.35
 14 10 0 20.53 1.43
 0 -11 0 0.31 0.29
 0 11 0 0.26 0.41
 1 -11 0 0.27 0.31
 -1 -11 0 0.71 0.33
 -1 11 0 -0.25 0.38
 1 11 0 0.2 0.41
 2 -11 0 5.78 0.65
 -2 -11 0 5.04 0.58
 2 11 0 5.11 0.67
 -2 11 0 4.37 0.65
 -2 11 0 5.49 0.77
 3 -11 0 6 0.68
 -3 -11 0 5.21 0.6
 3 11 0 5.61 0.69
 -3 11 0 6.53 0.77
 -3 11 0 4.49 0.75
 4 -11 0 20.84 1.13
 -4 -11 0 22.05 1.15
 -4 11 0 20.64 1.17
 -4 11 0 20.96 1.35
 4 11 0 21.23 1.23
 5 -11 0 1.75 0.44
 -5 -11 0 1.39 0.43
 5 11 0 1.53 0.53
 -5 11 0 1.07 0.45
 -5 11 0 2.46 0.61
 6 -11 0 28.95 1.38
 -6 -11 0 30.88 1.44
 -6 11 0 31.1 1.59
 -6 11 0 31.04 1.43
 6 11 0 32.41 1.56
 7 -11 0 0.51 0.3
 7 -11 0 0.38 0.32
 -7 -11 0 0.83 0.38
 7 11 0 0.39 0.48
 -7 11 0 1.16 0.47
 8 -11 0 37.13 1.56
 -8 -11 0 38.4 1.69
 -8 11 0 36.23 1.81
 8 11 0 37.97 1.8
 9 -11 0 3.2 0.51
 -9 11 0 2.59 0.61
 9 11 0 2.85 0.68
 10 -11 0 32.53 1.41
 10 11 0 32.31 1.72
 -10 11 0 31.11 1.68
 11 -11 0 0.04 0.32
 -11 11 0 0.49 0.49
 11 11 0 0.16 0.57
 12 -11 0 15.05 0.91
 12 11 0 15.03 1.31
 -12 11 0 14.44 1.22
 13 -11 0 -0.09 0.32
 -13 11 0 0.19 0.51
 13 11 0 0.38 0.61
 14 -11 0 3.31 0.51
 -14 11 0 3.35 0.77
 14 11 0 3.97 0.84
 0 -12 0 54.32 2.13
 0 12 0 56.79 2.23
 -1 -12 0 0.7 0.36
 1 -12 0 0.41 0.36
 -1 12 0 1.57 0.53
 1 12 0 0.01 0.44
 2 -12 0 19.9 1.14
 -2 -12 0 22.44 1.17
 2 12 0 20.31 1.25
 -2 12 0 19.45 1.24
 -3 -12 0 0.17 0.32
 3 -12 0 0.21 0.33
 -3 12 0 0.3 0.48
 3 12 0 0.18 0.45
 -3 12 0 0.04 0.43
 -4 -12 0 29.88 1.38
 4 -12 0 25.43 1.34
 -4 12 0 26.42 1.4
 -4 12 0 26.41 1.58
 4 12 0 28.1 1.46
 5 -12 0 4.62 0.65
 -5 -12 0 6.11 0.73
 5 12 0 4.83 0.75
 -5 12 0 3.97 0.66
 -5 12 0 4.09 0.78
 6 -12 0 4.19 0.61
 -6 -12 0 5.25 0.68
 -6 12 0 6.19 0.74
 6 12 0 5.02 0.76
 -6 12 0 3.94 0.74
 -7 -12 0 1.81 0.51
 7 -12 0 2.47 0.53
 7 12 0 3.1 0.68
 -7 12 0 1.99 0.64
 8 -12 0 0.92 0.39
 -8 -12 0 -0.02 0.35
 -8 12 0 0.11 0.47
 8 12 0 0.25 0.5
 9 -12 0 0.28 0.4
 -9 12 0 1.94 0.63
 9 12 0 1.64 0.65
 10 -12 0 2.07 0.5
 10 12 0 2.53 0.68
 -10 12 0 2.77 0.73
 11 -12 0 1.37 0.45
 11 12 0 1.17 0.64
 -11 12 0 0.32 0.55
 12 -12 0 6.2 0.7
 -12 12 0 8.35 1.09
 12 12 0 6.08 0.93
 13 -12 0 1.68 0.44
 13 12 0 1.95 0.75
 -13 12 0 3.1 0.81
 0 -13 0 -0.37 0.25
 0 13 0 -0.08 0.43
 1 -13 0 2.03 0.47
 -1 -13 0 1.48 0.46
 -1 13 0 0.93 0.53
 1 13 0 0.98 0.54
 2 -13 0 1.3 0.4
 -2 -13 0 1.71 0.48
 2 13 0 1.91 0.6
 -2 13 0 1.85 0.51
 3 -13 0 0.1 0.34
 -3 -13 0 0.19 0.31
 -3 13 0 0.68 0.57
 -3 13 0 1.18 0.48
 3 13 0 0.19 0.44
 4 -13 0 14.6 1.01
 -4 -13 0 12.9 0.93
 -4 13 0 9.75 0.94
 4 13 0 12.13 1.11
 -4 13 0 15.44 1.36
 -5 -13 0 1.31 0.44
 5 -13 0 0.25 0.37
 5 13 0 -0.11 0.47
 -5 13 0 0.03 0.42
 -5 13 0 -0.36 0.44
 -6 -13 0 16.05 1.06
 6 -13 0 13.86 1.02
 6 13 0 12.02 1.12
 -6 13 0 16.17 1.27
 -7 -13 0 0.16 0.39
 7 -13 0 0.22 0.39
 -7 13 0 0.15 0.55
 7 13 0 -0.27 0.49
 -8 -13 0 16.81 1.13
 8 -13 0 15.09 1.07
 8 13 0 16.35 1.26
 -8 13 0 13.71 1.33
 9 -13 0 -0.37 0.38
 9 13 0 0 0.56
 -9 13 0 0.24 0.56
 10 -13 0 15.32 1.08
 -10 13 0 16.85 1.4
 10 13 0 12.52 1.22
 11 -13 0 -0.66 0.37
 11 13 0 0.19 0.62
 -11 13 0 0.24 0.53
 12 -13 0 5.2 0.71
 12 13 0 5.52 0.93
 -12 13 0 5.18 0.96
 0 -14 0 8.25 0.87
 0 14 0 10.17 1.02
 -1 -14 0 0.19 0.37
 1 -14 0 0.2 0.32
 -1 14 0 0.68 0.48
 1 14 0 -0.38 0.47
 2 -14 0 8.91 0.86
 -2 -14 0 10.42 0.96
 -2 14 0 7.32 0.9
 2 14 0 11.75 1.11
 3 -14 0 1.33 0.49
 -3 -14 0 0.68 0.41
 -3 14 0 2.27 0.6
 3 14 0 1.52 0.59
 4 -14 0 8.51 0.86
 -4 -14 0 9.08 0.92
 -4 14 0 9.38 1.15
 4 14 0 10.09 1.06
 -4 14 0 7.28 0.89
 5 -14 0 0.49 0.41
 -5 -14 0 0.33 0.35
 -5 14 0 0.41 0.59
 5 14 0 0.34 0.51
 -5 14 0 0.62 0.5
 -6 -14 0 2.1 0.5
 6 -14 0 3.04 0.59
 6 14 0 1.56 0.59
 -6 14 0 2.11 0.77
 7 -14 0 0.64 0.45
 -7 -14 0 0.59 0.46
 -7 14 0 0.76 0.6
 7 14 0 0.15 0.58
 -8 -14 0 1.14 0.49
 8 -14 0 -0.27 0.4
 -8 14 0 0.47 0.6
 8 14 0 0.07 0.56
 9 -14 0 1.39 0.54
 -9 14 0 2.8 0.86
 9 14 0 1.69 0.72
 10 -14 0 0.96 0.54
 -10 14 0 1.36 0.75
 10 14 0 0.98 0.68
 11 -14 0 0.08 0.46
 -11 14 0 1.19 0.7
 11 14 0 -0.04 0.66
 0 -15 0 -0.3 0.3
 0 15 0 -0.17 0.51
 1 -15 0 0.93 0.43
 -1 -15 0 0.49 0.38
 -1 15 0 0.07 0.49
 1 15 0 0.72 0.5
 2 -15 0 0.22 0.37
 -2 -15 0 0.35 0.42
 2 15 0 1.17 0.62
 -2 15 0 0.78 0.52
 3 -15 0 -0.12 0.33
 -3 -15 0 0.07 0.4
 3 15 0 -0.38 0.53
 -3 15 0 0.87 0.52
 -4 -15 0 1.95 0.55
 4 -15 0 1.94 0.56
 -4 15 0 1.85 0.64
 4 15 0 1.75 0.7
 5 -15 0 0.35 0.42
 -5 -15 0 -0.26 0.39
 -5 15 0 0.04 0.61
 5 15 0 0.62 0.61
 -6 -15 0 3.27 0.65
 6 -15 0 4.42 0.72
 6 15 0 4.69 0.87
 -6 15 0 3.48 0.88
 7 -15 0 0.78 0.5
 -7 -15 0 0.59 0.46
 7 15 0 0.32 0.58
 -7 15 0 0.1 0.66
 8 -15 0 4.34 0.78
 8 15 0 4.4 0.83
 9 -15 0 -0.75 0.42
 9 15 0 -0.06 0.63
 -9 15 0 0.68 0.7
 10 -15 0 1.96 0.63
 10 15 0 0.91 0.72
 -10 15 0 2.62 0.86
 0 -16 0 1.81 0.55
 0 16 0 1.35 0.65
 1 -16 0 0.23 0.43
 -1 -16 0 -0.17 0.37
 1 16 0 0.43 0.56
 -1 16 0 0.79 0.59
 2 -16 0 1.94 0.53
 -2 -16 0 2.18 0.58
 -2 16 0 1.89 0.65
 2 16 0 3.5 0.78
 -3 -16 0 0.38 0.44
 3 -16 0 0.53 0.44
 3 16 0 0.23 0.59
 -3 16 0 1.27 0.61
 -4 -16 0 1.54 0.54
 4 -16 0 1.36 0.53
 -4 16 0 1.3 0.59
 4 16 0 0.58 0.57
 5 -16 0 0.21 0.46
 -5 -16 0 0.04 0.37
 5 16 0 0.89 0.64
 -6 -16 0 0.52 0.47
 6 -16 0 0.09 0.44
 6 16 0 0.17 0.57
 -6 16 0 0.32 0.62
 -7 -16 0 0.35 0.48
 7 -16 0 0 0.48
 7 16 0 -0.06 0.62
 -7 16 0 -0.66 0.62
 8 -16 0 0.13 0.51
 -8 16 0 -0.14 0.69
 8 16 0 -0.72 0.6
 9 -16 0 0.71 0.58
 9 16 0 -0.37 0.67
 -9 16 0 -0.03 0.73
 0 -17 0 -0.26 0.4
 0 17 0 -0.21 0.54
 1 -17 0 0.23 0.39
 -1 -17 0 -0.15 0.44
 1 17 0 -0.23 0.56
 -1 17 0 1.1 0.62
 2 -17 0 0.7 0.47
 -2 -17 0 0.35 0.48
 -2 17 0 -0.12 0.5
 2 17 0 0.35 0.65
 3 -17 0 0.46 0.5
 -3 -17 0 -0.44 0.4
 -3 17 0 0.86 0.61
 3 17 0 0.2 0.61
 4 -17 0 0.81 0.55
 -4 -17 0 0.86 0.56
 4 17 0 -0.07 0.66
 -5 -17 0 -0.09 0.46
 5 -17 0 0.12 0.49
 5 17 0 -0.43 0.63
 -6 -17 0 1.19 0.56
 6 -17 0 0.96 0.54
 6 17 0 0.55 0.69
 -7 -17 0 0.33 0.51
 7 -17 0 0.26 0.52
 7 17 0 -0.14 0.64
 -7 17 0 1.01 0.77
 0 -18 0 0.84 0.59
 0 18 0 1.1 0.7
 -1 -18 0 0.11 0.49
 1 -18 0 0.6 0.51
 -1 18 0 1.53 0.69
 1 18 0 -0.07 0.64
 -2 -18 0 0.84 0.54
 2 -18 0 0.46 0.52
 2 18 0 1.02 0.71
 -2 18 0 2.02 0.74
 -3 -18 0 0.2 0.45
 3 -18 0 0.59 0.53
 -3 18 0 0.55 0.65
 3 18 0 0.91 0.66
 -4 -18 0 0.96 0.56
 4 -18 0 0.43 0.52
 4 18 0 1.39 0.73
 -5 -18 0 0.47 0.54
 5 -18 0 0.26 0.48
 5 18 0 0.48 0.73
 17 0 -1 0.23 0.5
 16 0 -1 0.04 0.46
 15 0 -1 1.86 0.5
 14 0 -1 -0.33 0.34
 14 0 -1 0.14 0.2
 13 0 -1 3.04 0.32
 13 0 -1 2.75 0.52
 12 0 -1 0.23 0.29
 12 0 -1 0.32 0.17
 11 0 -1 0.5 0.28
 11 0 -1 0.62 0.17
 10 0 -1 0.1 0.13
 10 0 -1 -0.06 0.2
 9 0 -1 0.19 0.21
 9 0 -1 0.39 0.13
 8 0 -1 0.15 0.11
 7 0 -1 0.5 0.11
 6 0 -1 0.18 0.07
 5 0 -1 0.46 0.08
 5 0 -1 0.42 0.24
 4 0 -1 0.03 0.05
 4 0 -1 -0.1 0.17
 3 0 -1 0.1 0.16
 3 0 -1 -0.01 0.07
 3 0 -1 0.04 0.03
 2 0 -1 0.09 0.05
 2 0 -1 0 0.09
 1 0 -1 0.48 0.06
 1 0 -1 0.53 0.1
 1 0 1 1.18 0.08
 2 0 1 0.4 0.07
 -2 0 -1 0.32 0.07
 -3 0 -1 3.61 0.2
 3 0 1 3.48 0.2
 4 0 1 0.11 0.08
 -4 0 -1 0.08 0.08
 5 0 1 1.8 0.17
 -5 0 -1 1.77 0.17
 6 0 1 -0.08 0.09
 -6 0 -1 0.1 0.09
 -7 0 -1 3.72 0.26
 7 0 1 4.2 0.29
 8 0 1 -0.01 0.13
 -8 0 -1 0.08 0.11
 9 0 1 1.41 0.22
 10 0 1 -0.04 0.15
 11 0 1 0.21 0.18
 12 0 1 -0.08 0.19
 13 0 1 -0.12 0.21
 13 0 1 -0.14 0.31
 14 0 1 0 0.23
 14 0 1 -0.37 0.34
 15 0 1 0.88 0.5
 15 0 1 0.8 0.3
 16 0 1 -0.7 0.45
 17 -1 -1 1.15 0.57
 17 1 -1 0.67 0.56
 16 -1 -1 0.03 0.45
 16 1 -1 -0.16 0.45
 15 -1 -1 -0.31 0.4
 15 1 -1 0.38 0.4
 14 -1 -1 0.43 0.37
 14 1 -1 0.2 0.23
 14 1 -1 0.19 0.39
 13 -1 -1 0.57 0.33
 13 -1 -1 0.05 0.17
 13 1 -1 0.12 0.2
 13 1 -1 -0.4 0.31
 12 -1 -1 0.29 0.31
 12 -1 -1 0.57 0.18
 12 1 -1 0.24 0.19
 12 1 -1 0.49 0.34
 11 -1 -1 0.91 0.18
 11 -1 -1 1.1 0.35
 11 1 -1 0.74 0.2
 10 -1 -1 1.1 0.18
 10 -1 -1 1.31 0.3
 10 1 -1 1.48 0.21
 9 -1 -1 1.85 0.34
 9 -1 -1 2.18 0.21
 9 1 -1 1.89 0.22
 8 -1 -1 2.18 0.31
 8 -1 -1 1.84 0.18
 8 1 -1 1.93 0.2
 7 -1 -1 1.1 0.23
 7 -1 -1 1.28 0.13
 7 1 -1 1.13 0.15
 6 -1 -1 2.43 0.26
 6 -1 -1 2.68 0.16
 6 1 -1 2.47 0.18
 5 -1 -1 0.36 0.13
 5 -1 -1 0.76 0.27
 5 -1 -1 0.59 0.08
 5 1 -1 0.71 0.11
 4 -1 -1 3.29 0.14
 4 -1 -1 2.89 0.36
 4 -1 -1 3.17 0.23
 4 1 -1 3.35 0.18
 4 1 -1 2.67 0.35
 3 -1 -1 0.01 0.07
 3 -1 -1 0.12 0.16
 3 -1 -1 0 0.03
 3 1 -1 0.27 0.18
 3 1 -1 0.09 0.07
 2 -1 -1 2.82 0.13
 2 -1 -1 2.66 0.16
 2 -1 -1 2.77 0.26
 2 1 -1 2.9 0.17
 2 1 -1 2.61 0.22
 1 -1 -1 0.43 0.07
 -1 -1 1 0.51 0.08
 1 -1 -1 0.45 0.09
 1 -1 -1 0.24 0.08
 -1 1 1 0.5 0.11
 1 1 -1 0.47 0.05
 -1 1 1 0.35 0.08
 1 1 -1 0.39 0.08
 1 -1 1 0.55 0.07
 -1 -1 -1 0.89 0.09
 -1 1 -1 0.7 0.08
 1 1 1 1.12 0.1
 -2 -1 -1 0.74 0.1
 2 -1 1 0.59 0.08
 -2 1 -1 0.67 0.09
 2 1 1 0.81 0.11
 -3 -1 -1 0.2 0.09
 3 -1 1 0.32 0.08
 3 1 1 0.2 0.09
 -3 1 -1 0.39 0.09
 -4 -1 -1 1.92 0.17
 4 -1 1 1.91 0.17
 -4 1 -1 1.76 0.16
 4 1 1 2.09 0.19
 -5 -1 -1 0.79 0.13
 5 -1 1 0.64 0.12
 -5 1 -1 0.78 0.12
 5 1 1 0.56 0.13
 -6 -1 -1 3.18 0.24
 6 -1 1 3.51 0.24
 6 1 1 3.63 0.27
 -6 1 -1 3.83 0.24
 -7 -1 -1 2.87 0.26
 7 -1 1 2.9 0.25
 7 1 1 2.49 0.25
 -7 1 -1 3.07 0.26
 8 -1 1 3.51 0.3
 8 1 1 3.6 0.31
 -8 1 -1 3.25 0.28
 9 -1 1 5.02 0.35
 9 1 1 4.98 0.38
 10 -1 1 4.4 0.37
 10 1 1 4.6 0.39
 11 -1 1 4.39 0.38
 11 1 1 3.38 0.36
 12 -1 1 1.35 0.27
 12 -1 1 1.21 0.4
 12 1 1 0.49 0.23
 13 -1 1 2.61 0.35
 13 -1 1 3.1 0.57
 13 1 1 3.2 0.4
 14 -1 1 0.77 0.28
 14 -1 1 0.27 0.43
 14 1 1 0.63 0.41
 14 1 1 0.53 0.27
 15 -1 1 1.04 0.53
 15 -1 1 0.58 0.39
 15 1 1 1.26 0.54
 15 1 1 0.82 0.32
 16 -1 1 0.3 0.48
 16 1 1 -0.45 0.47
 17 -2 -1 2.66 0.69
 17 2 -1 1.83 0.6
 16 -2 -1 1.98 0.59
 16 2 -1 1.43 0.53
 15 -2 -1 1.15 0.48
 15 2 -1 1.32 0.52
 14 -2 -1 2.25 0.51
 14 2 -1 2.97 0.39
 14 2 -1 3 0.61
 13 -2 -1 0.61 0.37
 13 -2 -1 0.84 0.2
 13 2 -1 0.33 0.25
 13 2 -1 1.28 0.46
 12 -2 -1 0.62 0.34
 12 -2 -1 0.41 0.17
 12 2 -1 0.48 0.23
 11 -2 -1 2.05 0.39
 11 -2 -1 1.81 0.22
 11 2 -1 1.61 0.27
 10 -2 -1 3.67 0.45
 10 -2 -1 3.24 0.26
 10 2 -1 3.12 0.32
 9 -2 -1 0.14 0.11
 9 -2 -1 0.2 0.23
 -9 -2 1 0.24 0.13
 9 2 -1 0.13 0.15
 8 -2 -1 0.49 0.11
 -8 -2 1 0.6 0.14
 8 -2 -1 0.54 0.22
 8 2 -1 0.74 0.16
 7 -2 -1 0.06 0.15
 -7 -2 1 0.09 0.09
 7 -2 -1 0.26 0.09
 7 2 -1 0.03 0.11
 -6 -2 1 0.37 0.11
 6 -2 -1 0.35 0.08
 6 -2 -1 0.27 0.14
 6 2 -1 0.25 0.12
 5 -2 -1 0.69 0.09
 5 -2 -1 0.79 0.17
 5 2 -1 0.65 0.13
 4 -2 -1 1.68 0.12
 4 -2 -1 1.73 0.32
 4 -2 -1 1.6 0.19
 4 2 -1 1.94 0.19
 4 2 -1 1.8 0.27
 3 -2 -1 0.15 0.1
 3 -2 -1 0.23 0.16
 3 -2 -1 0.12 0.06
 3 2 -1 0.14 0.16
 3 2 -1 0.35 0.14
 2 -2 -1 10.4 0.47
 2 -2 -1 10.49 0.39
 -2 -2 1 9.77 0.44
 2 -2 -1 10.12 0.38
 2 2 -1 10.16 0.43
 -2 2 1 11.17 0.43
 2 2 -1 9.47 0.42
 -1 -2 1 0.03 0.07
 1 -2 -1 0 0.08
 1 -2 -1 0.07 0.07
 1 2 -1 0.19 0.12
 -1 2 1 -0.03 0.11
 1 2 -1 -0.05 0.08
 0 -2 1 16.29 0.53
 0 -2 -1 16.52 0.53
 0 2 -1 16.16 0.56
 0 2 1 17.12 0.54
 -1 -2 -1 0.69 0.1
 1 -2 1 0.44 0.08
 -1 2 -1 0.6 0.1
 1 2 1 0.59 0.1
 2 -2 1 26.03 0.81
 -2 -2 -1 27.03 0.83
 -2 2 -1 27.97 0.83
 2 2 1 26.48 0.84
 -3 -2 -1 1.64 0.16
 3 -2 1 1.69 0.15
 3 2 1 1.79 0.18
 -3 2 -1 2.14 0.18
 4 -2 1 24.33 0.77
 -4 -2 -1 23.12 0.77
 -4 2 -1 23.92 0.76
 4 2 1 23.19 0.79
 5 -2 1 2.94 0.22
 -5 -2 -1 2.79 0.24
 5 2 1 3.26 0.27
 -5 2 -1 2.53 0.2
 -6 -2 -1 8.45 0.4
 6 -2 1 8.62 0.39
 -6 2 -1 8.55 0.39
 6 2 1 8.29 0.42
 7 -2 1 2.41 0.24
 -7 -2 -1 2.77 0.25
 7 2 1 2.8 0.28
 -7 2 -1 3.21 0.27
 8 -2 1 2.07 0.23
 -8 -2 -1 1.82 0.23
 8 2 1 2.35 0.28
 -8 2 -1 2.42 0.24
 -9 -2 -1 0.76 0.21
 9 -2 1 0.3 0.16
 9 2 1 0.53 0.21
 10 -2 1 0.09 0.16
 10 -2 1 -0.12 0.24
 10 2 1 -0.1 0.18
 11 -2 1 0.1 0.17
 11 -2 1 -0.18 0.27
 11 2 1 -0.16 0.19
 12 -2 1 0.17 0.2
 12 -2 1 0.64 0.35
 12 2 1 0.34 0.24
 13 -2 1 0.28 0.23
 13 -2 1 0.13 0.37
 13 2 1 0.54 0.28
 14 -2 1 0.61 0.26
 14 -2 1 0.06 0.42
 14 2 1 0.67 0.31
 15 -2 1 1.78 0.54
 15 2 1 1.08 0.54
 15 2 1 0.77 0.35
 16 -2 1 1.32 0.54
 16 2 1 0.83 0.54
 17 -3 -1 1.22 0.52
 17 3 -1 1.46 0.63
 16 -3 -1 -0.12 0.39
 16 3 -1 0.4 0.52
 15 -3 -1 0.1 0.4
 15 3 -1 -0.02 0.46
 15 3 -1 0.48 0.48
 14 -3 -1 0.76 0.42
 14 3 -1 0.22 0.3
 14 3 -1 0.26 0.41
 13 -3 -1 0.05 0.28
 13 -3 -1 0.17 0.17
 13 3 -1 0.49 0.26
 12 -3 -1 0.74 0.19
 12 -3 -1 1.15 0.37
 12 3 -1 1.2 0.3
 11 -3 -1 0.06 0.14
 11 -3 -1 0.13 0.26
 11 3 -1 0.12 0.21
 10 -3 -1 5.61 0.53
 10 -3 -1 6.19 0.34
 10 3 -1 6.1 0.46
 9 -3 -1 2.22 0.21
 -9 -3 1 2.47 0.28
 9 -3 -1 2.07 0.33
 9 3 -1 2.43 0.29
 -8 -3 1 9.94 0.48
 8 -3 -1 9.43 0.56
 8 -3 -1 10.25 0.41
 8 3 -1 9.1 0.49
 -7 -3 1 2.55 0.25
 7 -3 -1 2.08 0.28
 7 -3 -1 2.45 0.2
 7 3 -1 2.22 0.25
 -6 -3 1 28.5 0.95
 6 -3 -1 27.57 1.01
 6 -3 -1 27.9 0.88
 6 3 -1 29.69 0.98
 -5 -3 1 1.3 0.19
 5 -3 -1 1.38 0.14
 5 -3 -1 1.49 0.21
 5 3 -1 1.6 0.23
 -4 -3 1 18.1 0.66
 4 -3 -1 18.4 0.66
 4 -3 -1 17.43 0.58
 4 -3 -1 16.15 0.81
 4 3 -1 18.41 0.69
 3 -3 -1 0.04 0.09
 3 -3 -1 0.22 0.11
 -3 -3 1 0.19 0.13
 3 -3 -1 -0.07 0.15
 -3 3 1 0.16 0.12
 3 3 -1 0.02 0.14
 3 3 -1 0.2 0.16
 -3 3 1 -0.18 0.11
 2 -3 -1 14.15 0.58
 -2 -3 1 14.72 0.58
 2 -3 -1 13.56 0.54
 2 -3 -1 13.44 0.51
 2 3 -1 14.5 0.52
 -2 3 1 15.01 0.63
 2 3 -1 13.14 0.59
 -2 3 1 13.3 0.56
 -1 -3 1 -0.04 0.1
 1 -3 -1 0.09 0.1
 1 -3 -1 0.21 0.12
 1 3 -1 0.2 0.19
 -1 3 1 0.25 0.19
 1 3 -1 -0.02 0.12
 -1 3 1 0.44 0.17
 0 -3 1 5.1 0.28
 0 -3 -1 4.29 0.26
 0 3 1 4.81 0.29
 0 3 -1 5.1 0.3
 0 3 -1 5.12 0.34
 1 -3 1 1.2 0.15
 -1 -3 -1 1.11 0.16
 1 -3 1 1.17 0.1
 -1 3 -1 1.2 0.17
 1 3 1 1.34 0.18
 -1 3 -1 1.24 0.16
 -2 -3 -1 0.61 0.12
 2 -3 1 0.52 0.09
 2 -3 1 0.28 0.09
 2 3 1 0.52 0.14
 -2 3 -1 0.65 0.13
 3 -3 1 0.25 0.09
 -3 -3 -1 0.03 0.09
 3 -3 1 0.34 0.1
 -3 3 -1 0.36 0.11
 3 3 1 0.43 0.14
 4 -3 1 10.27 0.43
 -4 -3 -1 10.45 0.45
 4 -3 1 10.02 0.44
 4 3 1 10.66 0.47
 -4 3 -1 10.62 0.44
 -5 -3 -1 1.03 0.16
 5 -3 1 1.26 0.17
 5 -3 1 1.32 0.2
 -5 3 -1 1.16 0.16
 5 3 1 1.13 0.18
 6 -3 1 18.02 0.74
 6 -3 1 18.42 0.67
 -6 -3 -1 17.9 0.69
 6 3 1 18.5 0.71
 -6 3 -1 18.21 0.67
 -7 -3 -1 2.33 0.26
 7 -3 1 2.92 0.26
 7 -3 1 2.19 0.3
 -7 3 -1 2.78 0.25
 7 3 1 2.46 0.29
 8 -3 1 29.14 1
 -8 -3 -1 29.03 1.04
 8 -3 1 30.34 1.15
 8 3 1 29.26 1.06
 -8 3 -1 29.2 1
 9 -3 1 5.14 0.48
 9 -3 1 5.44 0.37
 -9 -3 -1 3.99 0.37
 9 3 1 4.58 0.41
 10 -3 1 5.57 0.55
 10 -3 1 6.05 0.41
 10 3 1 6.86 0.5
 11 -3 1 1.11 0.23
 11 -3 1 1.2 0.34
 11 3 1 0.95 0.28
 12 -3 1 12.92 0.83
 12 -3 1 13.16 0.65
 12 3 1 11.98 0.71
 13 -3 1 5.73 0.68
 13 -3 1 4.21 0.42
 13 3 1 4.26 0.51
 14 -3 1 3.11 0.39
 14 -3 1 3.61 0.6
 14 3 1 2.61 0.45
 15 -3 1 1.61 0.5
 15 3 1 1.05 0.38
 16 -3 1 1.6 0.59
 16 3 1 1.71 0.66
 17 -4 -1 0.5 0.52
 17 4 -1 1.18 0.61
 16 -4 -1 8.37 0.89
 16 4 -1 8.67 1.01
 15 -4 -1 1.07 0.48
 15 4 -1 1.25 0.41
 15 4 -1 1.38 0.59
 14 -4 -1 10.28 0.82
 14 4 -1 10.33 0.76
 13 -4 -1 2.53 0.48
 13 -4 -1 2.6 0.29
 13 4 -1 2.25 0.41
 12 -4 -1 8.71 0.47
 12 -4 -1 9.46 0.69
 12 4 -1 9.1 0.65
 11 -4 -1 0.19 0.26
 11 -4 -1 0.14 0.15
 11 4 -1 -0.21 0.23
 10 -4 -1 2 0.37
 10 -4 -1 1.81 0.22
 10 4 -1 1.69 0.32
 9 -4 -1 -0.04 0.12
 9 -4 -1 0.16 0.19
 -9 -4 1 -0.11 0.16
 9 4 -1 0.19 0.22
 -8 -4 1 1.62 0.25
 8 -4 -1 0.98 0.16
 8 -4 -1 1.29 0.27
 8 4 -1 1.22 0.27
 -8 4 1 1.11 0.16
 7 -4 -1 0.49 0.13
 -7 -4 1 0.99 0.2
 7 -4 -1 0.49 0.18
 -7 4 1 0.71 0.14
 7 4 -1 0.96 0.24
 -6 -4 1 0.51 0.17
 6 -4 -1 0.37 0.16
 6 -4 -1 0.48 0.12
 -6 4 1 0.5 0.13
 6 4 -1 0.62 0.21
 -5 -4 1 1.72 0.24
 5 -4 -1 1.93 0.19
 5 -4 -1 2.26 0.24
 5 4 -1 2.18 0.3
 -5 4 1 2.31 0.21
 4 -4 -1 15.56 0.6
 -4 -4 1 16.67 0.68
 4 -4 -1 15.59 0.62
 -4 4 1 15.71 0.67
 4 4 -1 16.37 0.71
 -4 4 1 16.59 0.61
 3 -4 -1 4.12 0.37
 3 -4 -1 4.1 0.27
 3 -4 -1 3.67 0.29
 -3 -4 1 4.29 0.38
 -3 4 1 4.69 0.38
 3 4 -1 4.25 0.31
 -3 4 1 4.34 0.33
 3 4 -1 4.42 0.41
 -2 -4 1 39.35 1.32
 2 -4 -1 40.29 1.31
 2 -4 -1 40.14 1.29
 2 4 -1 41.33 1.18
 -2 4 1 38.51 1.41
 -2 4 1 39.55 1.32
 2 4 -1 40.11 1.35
 -1 -4 1 1.62 0.22
 1 -4 -1 2.22 0.28
 1 -4 -1 2.07 0.2
 1 4 -1 1.81 0.31
 -1 4 1 1.6 0.3
 1 4 -1 1.47 0.24
 -1 4 1 2.44 0.32
 0 -4 -1 83.8 2.47
 0 -4 1 85.41 2.46
 0 4 1 85.78 2.49
 0 4 -1 80.28 2.55
 0 4 -1 85.88 2.47
 1 -4 1 1.48 0.13
 -1 -4 -1 1.65 0.22
 1 -4 1 1.62 0.2
 -1 4 -1 1.35 0.21
 1 4 1 1.42 0.23
 -1 4 -1 1.44 0.25
 2 -4 1 87.51 2.5
 -2 -4 -1 84.22 2.52
 2 -4 1 87.85 2.43
 -2 4 -1 85.63 2.5
 2 4 1 86.37 2.54
 -2 4 -1 92.14 2.59
 3 -4 1 1.89 0.18
 3 -4 1 1.94 0.19
 -3 -4 -1 1.91 0.22
 3 4 1 1.99 0.23
 -3 4 -1 1.86 0.21
 -4 -4 -1 84.07 2.47
 4 -4 1 85.68 2.43
 4 -4 1 81.43 2.43
 -4 4 -1 86.17 2.44
 4 4 1 86.5 2.5
 5 -4 1 8.61 0.41
 5 -4 1 8.1 0.43
 -5 -4 -1 8.13 0.43
 -5 4 -1 8.91 0.42
 5 4 1 8.52 0.46
 -6 -4 -1 30.29 1.07
 6 -4 1 30.55 1.08
 6 -4 1 32.55 1.04
 -6 4 -1 30.84 1.03
 6 4 1 29.8 1.08
 7 -4 1 2.28 0.3
 -7 -4 -1 2.2 0.27
 7 -4 1 2.14 0.25
 -7 4 -1 2.41 0.26
 7 4 1 1.99 0.29
 -8 -4 -1 7.11 0.46
 8 -4 1 7.39 0.5
 8 -4 1 7.01 0.41
 8 4 1 6.43 0.48
 -8 4 -1 7.01 0.41
 -9 -4 -1 2.12 0.3
 9 -4 1 0.88 0.27
 9 -4 1 2.21 0.26
 9 4 1 2.15 0.33
 10 -4 1 0.25 0.19
 10 -4 1 -0.28 0.18
 10 4 1 0.06 0.23
 11 -4 1 0.34 0.2
 11 -4 1 0.11 0.27
 11 4 1 0.44 0.27
 12 -4 1 0.94 0.36
 12 -4 1 1.39 0.28
 12 4 1 1.83 0.38
 13 -4 1 1.24 0.29
 13 -4 1 0.59 0.36
 13 4 1 1.78 0.41
 14 -4 1 4.45 0.45
 14 -4 1 4.1 0.62
 14 4 1 4.43 0.57
 15 -4 1 1.14 0.52
 15 4 1 1.07 0.4
 16 -4 1 5.03 0.79
 17 -5 -1 -0.27 0.44
 17 5 -1 -0.8 0.5
 16 -5 -1 -0.55 0.42
 16 5 -1 0.16 0.45
 15 -5 -1 -0.29 0.36
 15 5 -1 0.67 0.5
 15 5 -1 0.3 0.38
 14 -5 -1 0.81 0.43
 14 5 -1 0.36 0.39
 13 -5 -1 0.23 0.18
 13 -5 -1 0.15 0.29
 13 5 -1 0.35 0.34
 12 -5 -1 9.21 0.72
 12 -5 -1 9.04 0.49
 12 5 -1 10.96 0.76
 11 -5 -1 1.58 0.23
 11 -5 -1 1.72 0.37
 11 5 -1 1.28 0.36
 10 -5 -1 9.3 0.63
 10 -5 -1 11.05 0.51
 10 5 -1 10.89 0.7
 9 -5 -1 1.64 0.23
 -9 -5 1 2.48 0.34
 9 -5 -1 2.32 0.35
 9 5 -1 2.13 0.38
 8 -5 -1 36.59 1.2
 -8 -5 1 39.19 1.35
 8 -5 -1 35.89 1.35
 8 5 -1 40.16 1.4
 -8 5 1 36.9 1.2
 7 -5 -1 2.22 0.3
 7 -5 -1 2.61 0.25
 -7 -5 1 2.17 0.3
 -7 5 1 2.46 0.25
 7 5 -1 1.93 0.33
 -6 -5 1 37.36 1.33
 6 -5 -1 38 1.29
 6 -5 -1 37.83 1.21
 -6 5 1 38.41 1.21
 6 5 -1 38.13 1.37
 -6 5 1 37.85 1.36
 -5 -5 1 9.3 0.53
 5 -5 -1 8.95 0.45
 5 -5 -1 9.12 0.48
 5 5 -1 9.87 0.59
 -5 5 1 8.61 0.53
 -5 5 1 9.96 0.47
 -4 -5 1 73.88 2.34
 4 -5 -1 73.93 2.23
 4 -5 -1 76.93 2.26
 4 5 -1 76.82 2.37
 -4 5 1 75.27 2.36
 -4 5 1 76.34 2.26
 3 -5 -1 2.31 0.25
 3 -5 -1 2.2 0.27
 -3 -5 1 1.46 0.26
 3 -5 -1 2.57 0.32
 3 5 -1 1.93 0.3
 -3 5 1 2.61 0.32
 -3 5 1 2.74 0.38
 2 -5 -1 52.77 1.74
 -2 -5 1 55.79 1.77
 2 -5 -1 56.6 1.68
 -2 5 1 50.95 1.87
 2 5 -1 56.06 1.8
 -2 5 1 54.62 1.77
 1 -5 -1 0.06 0.1
 -1 -5 1 0.19 0.15
 1 -5 -1 0.07 0.14
 1 5 -1 0 0.18
 1 5 -1 0.67 0.29
 -1 5 1 0.06 0.19
 -1 5 1 -0.21 0.21
 0 -5 1 5.97 0.42
 0 -5 -1 6.9 0.28
 0 -5 -1 6.48 0.44
 0 5 -1 6.85 0.47
 0 5 1 6.6 0.49
 0 5 -1 6.75 0.55
 1 -5 1 0.84 0.2
 -1 -5 -1 0.53 0.19
 -1 5 -1 0.79 0.25
 -1 5 -1 0.93 0.23
 1 5 1 1.18 0.26
 2 -5 1 1.03 0.13
 -2 -5 -1 0.83 0.19
 2 -5 1 1.05 0.19
 -2 5 -1 0.85 0.19
 -2 5 -1 0.49 0.19
 2 5 1 1.18 0.24
 3 -5 1 0.06 0.1
 3 -5 1 -0.11 0.1
 -3 -5 -1 -0.02 0.14
 3 5 1 -0.14 0.16
 -3 5 -1 0.02 0.12
 -3 5 -1 -0.08 0.15
 -4 -5 -1 19.78 0.78
 4 -5 1 19.6 0.75
 4 -5 1 20.66 0.72
 -4 5 -1 19.81 0.76
 4 5 1 20.01 0.82
 5 -5 1 0.16 0.13
 -5 -5 -1 0.28 0.17
 5 -5 1 0.4 0.15
 5 5 1 0.48 0.21
 -5 5 -1 0.3 0.15
 6 -5 1 35.56 1.19
 6 -5 1 34.65 1.15
 -6 -5 -1 34.45 1.21
 -6 5 -1 33.43 1.14
 6 5 1 32.4 1.22
 7 -5 1 3.45 0.32
 -7 -5 -1 3.64 0.38
 7 -5 1 3.58 0.36
 -7 5 -1 3.34 0.32
 7 5 1 3.44 0.39
 -8 -5 -1 32.71 1.23
 8 -5 1 32.51 1.24
 8 -5 1 35.74 1.18
 -8 5 -1 33.64 1.16
 8 5 1 35.11 1.29
 9 -5 1 3.55 0.34
 -9 -5 -1 3.3 0.39
 9 -5 1 2.04 0.34
 9 5 1 2.05 0.37
 10 -5 1 44.1 1.64
 10 -5 1 44.18 1.48
 10 5 1 46.13 1.64
 11 -5 1 13.28 0.65
 11 -5 1 11.23 0.77
 11 5 1 14 0.81
 12 -5 1 25.81 1.02
 12 -5 1 26.77 1.25
 12 5 1 26.84 1.2
 13 -5 1 3.64 0.4
 13 -5 1 5.08 0.65
 13 5 1 5.2 0.62
 14 -5 1 12.69 0.69
 14 -5 1 14.27 0.98
 14 5 1 10.61 0.85
 15 -5 1 1.44 0.5
 15 5 1 2.06 0.51
 16 -5 1 2.5 0.61
 16 5 1 2.45 0.57
 16 -6 -1 15.2 1.11
 16 6 -1 14.15 1.27
 15 -6 -1 0.33 0.39
 15 6 -1 0.25 0.44
 14 -6 -1 22 1.19
 14 6 -1 20.59 1.16
 13 -6 -1 0.35 0.35
 13 -6 -1 0.2 0.19
 13 6 -1 0.86 0.44
 12 -6 -1 21.16 1.06
 12 -6 -1 18.73 0.79
 12 6 -1 20.54 1.08
 11 -6 -1 2.14 0.28
 11 -6 -1 1.36 0.36
 11 6 -1 1.6 0.45
 10 -6 -1 14.66 0.63
 10 -6 -1 13.15 0.77
 10 6 -1 13.56 0.85
 9 -6 -1 -0.12 0.14
 -9 -6 1 0.02 0.21
 9 -6 -1 -0.21 0.19
 9 6 -1 0.52 0.31
 8 -6 -1 1.31 0.28
 8 -6 -1 0.59 0.18
 -8 -6 1 1.14 0.29
 8 6 -1 1.26 0.36
 -8 6 1 1.13 0.32
 7 -6 -1 0.19 0.15
 -7 -6 1 -0.1 0.18
 7 -6 -1 -0.01 0.18
 -7 6 1 0.25 0.15
 7 6 -1 -0.08 0.26
 -7 6 1 0.08 0.18
 6 -6 -1 0.44 0.18
 -6 -6 1 0.44 0.21
 6 -6 -1 0.02 0.15
 -6 6 1 0.42 0.24
 6 6 -1 0.03 0.25
 -6 6 1 0.51 0.18
 5 -6 -1 4.61 0.38
 5 -6 -1 4.06 0.36
 -5 -6 1 4.16 0.44
 5 6 -1 4 0.47
 -5 6 1 4.18 0.46
 -5 6 1 4.94 0.4
 4 -6 -1 37.43 1.23
 -4 -6 1 35.84 1.35
 4 -6 -1 36.77 1.29
 4 6 -1 37.41 1.41
 -4 6 1 36.38 1.39
 -4 6 1 36.21 1.29
 -3 -6 1 1.72 0.29
 3 -6 -1 1.54 0.27
 -3 6 1 1.19 0.29
 -3 6 1 2.02 0.37
 3 6 -1 1.82 0.32
 2 -6 -1 56.43 1.85
 -2 -6 1 59.76 1.88
 -2 6 1 50.89 1.98
 -2 6 1 57.77 1.88
 2 6 -1 56.37 1.9
 -1 -6 1 11.06 0.61
 1 -6 -1 11.63 0.45
 1 -6 -1 11.42 0.62
 1 6 -1 12.41 0.79
 1 6 -1 12.36 0.66
 -1 6 1 11.67 0.65
 0 -6 -1 94 2.93
 0 -6 -1 100.18 2.63
 0 -6 1 97.73 2.93
 0 6 -1 92.39 3.07
 0 6 -1 98.57 2.95
 0 6 1 96.16 2.96
 1 -6 1 -0.05 0.13
 -1 -6 -1 0.33 0.19
 -1 6 -1 0.37 0.2
 1 6 1 -0.2 0.21
 -1 6 -1 0.09 0.2
 -2 -6 -1 184.27 5.14
 2 -6 1 182.84 5.11
 2 -6 1 170.62 4.93
 2 6 1 183.91 5.17
 -2 6 -1 179.97 5.22
 -2 6 -1 182.94 5.12
 3 -6 1 2.44 0.29
 3 -6 1 2.55 0.23
 -3 -6 -1 1.97 0.28
 -3 6 -1 1.96 0.33
 3 6 1 2.04 0.31
 -3 6 -1 1.77 0.26
 -4 -6 -1 84.26 2.58
 4 -6 1 82.51 2.52
 4 -6 1 86.54 2.46
 4 6 1 85.39 2.62
 -4 6 -1 83.24 2.53
 -4 6 -1 84.92 2.65
 -5 -6 -1 0.74 0.22
 5 -6 1 0.88 0.18
 5 -6 1 0.98 0.21
 -5 6 -1 0.85 0.21
 5 6 1 0.68 0.27
 6 -6 1 54.22 1.72
 6 -6 1 54.65 1.72
 -6 -6 -1 54.42 1.8
 6 6 1 50.71 1.81
 -6 6 -1 56.26 1.73
 -7 -6 -1 8.63 0.55
 7 -6 1 8.14 0.49
 7 -6 1 8.59 0.51
 -7 6 -1 8.85 0.5
 7 6 1 8.17 0.6
 8 -6 1 9.69 0.54
 -8 -6 -1 10.37 0.63
 8 -6 1 10.57 0.61
 8 6 1 10.33 0.68
 -9 -6 -1 4.06 0.49
 9 -6 1 4.02 0.46
 9 -6 1 4.19 0.39
 9 6 1 4.89 0.52
 10 -6 1 0.83 0.31
 10 -6 1 0.18 0.2
 10 6 1 0.94 0.35
 11 -6 1 -0.05 0.2
 11 -6 1 0.06 0.26
 11 6 1 -0.01 0.3
 12 -6 1 3.36 0.53
 12 -6 1 3.16 0.38
 12 6 1 4.16 0.57
 13 -6 1 0.02 0.23
 13 -6 1 0.26 0.33
 13 6 1 0.09 0.38
 14 -6 1 7.82 0.6
 14 -6 1 10.03 0.88
 14 6 1 8.27 0.84
 15 -6 1 0.8 0.44
 15 6 1 1.05 0.51
 16 -7 -1 0.56 0.46
 16 7 -1 1.14 0.61
 16 7 -1 0.63 0.53
 15 -7 -1 0.02 0.39
 -15 7 1 -0.15 0.38
 15 7 -1 0.64 0.48
 14 -7 -1 0.73 0.41
 -14 7 1 0.01 0.39
 14 7 -1 -0.07 0.44
 13 -7 -1 0.37 0.23
 13 -7 -1 0.57 0.38
 -13 7 1 0.31 0.38
 13 7 -1 1.42 0.5
 12 -7 -1 8.71 0.78
 12 -7 -1 8.32 0.52
 -12 7 1 8.49 0.81
 12 7 -1 8.28 0.82
 11 -7 -1 0.04 0.26
 11 -7 -1 1.04 0.24
 -11 7 1 1.42 0.4
 11 7 -1 0.88 0.42
 10 -7 -1 23.7 0.94
 10 -7 -1 24.32 1.11
 -10 7 1 23.65 1.19
 10 7 -1 25.21 1.2
 -9 -7 1 5.05 0.62
 9 -7 -1 5.05 0.52
 9 -7 -1 4.9 0.41
 9 7 -1 3.77 0.56
 -9 7 1 4.91 0.58
 -8 -7 1 62.29 2.12
 8 -7 -1 62.23 2.05
 8 -7 -1 61.22 1.94
 8 7 -1 62.53 2.18
 -8 7 1 61.28 2.17
 7 -7 -1 4.39 0.44
 -7 -7 1 4.32 0.5
 7 -7 -1 4.44 0.4
 -7 7 1 3.24 0.45
 -7 7 1 4.83 0.42
 7 7 -1 5.3 0.59
 6 -7 -1 79.6 2.45
 -6 -7 1 76.54 2.57
 6 -7 -1 80.26 2.46
 6 7 -1 82.78 2.65
 -6 7 1 81.95 2.65
 -6 7 1 77.88 2.45
 5 -7 -1 2.98 0.37
 5 -7 -1 2.29 0.3
 -5 -7 1 1.76 0.34
 -5 7 1 2.27 0.39
 -5 7 1 2.82 0.37
 5 7 -1 2.34 0.42
 -4 -7 1 69.04 2.28
 4 -7 -1 67.76 2.22
 4 -7 -1 68.14 2.12
 4 7 -1 69.83 2.33
 -4 7 1 70.76 2.24
 -4 7 1 69.11 2.37
 3 -7 -1 6.85 0.52
 -3 -7 1 6.2 0.57
 -3 7 1 7.15 0.6
 -3 7 1 7.22 0.71
 3 7 -1 6.35 0.61
 2 -7 -1 38.37 1.43
 -2 -7 1 39.79 1.45
 -2 7 1 38.94 1.61
 2 7 -1 37.97 1.47
 -2 7 1 39.35 1.47
 -1 -7 1 0.05 0.2
 1 -7 -1 -0.1 0.18
 1 7 -1 0.51 0.28
 -1 7 1 0.07 0.24
 0 -7 -1 12.28 0.69
 0 -7 1 11.14 0.66
 0 7 -1 10.57 0.69
 0 7 -1 11.24 0.44
 0 7 1 11.8 0.71
 0 7 -1 11.54 0.83
 1 -7 1 0.54 0.23
 -1 -7 -1 0.35 0.23
 -1 7 -1 0.71 0.29
 -1 7 -1 0.33 0.27
 1 7 1 0.47 0.3
 2 -7 1 2.16 0.3
 -2 -7 -1 2.12 0.32
 2 7 1 2.12 0.35
 -2 7 -1 1.85 0.35
 -2 7 -1 1.77 0.3
 -3 -7 -1 3.91 0.41
 3 -7 1 3.58 0.28
 3 -7 1 3.88 0.4
 3 7 1 3.76 0.43
 -3 7 -1 3.68 0.38
 -3 7 -1 3.89 0.48
 4 -7 1 18.5 0.72
 -4 -7 -1 19.68 0.88
 4 -7 1 18.43 0.82
 4 7 1 18.71 0.92
 -4 7 -1 19.82 0.96
 -4 7 -1 19.06 0.84
 5 -7 1 -0.06 0.16
 -5 -7 -1 -0.02 0.19
 5 -7 1 0.09 0.15
 -5 7 -1 -0.1 0.18
 -5 7 -1 0.02 0.24
 5 7 1 -0.18 0.24
 6 -7 1 66.97 2.07
 6 -7 1 64.93 2.03
 -6 -7 -1 66.78 2.15
 6 7 1 65.7 2.19
 -6 7 -1 63.58 2.06
 -6 7 -1 61.5 2.21
 7 -7 1 1.42 0.27
 -7 -7 -1 1.72 0.32
 7 -7 1 1.56 0.28
 7 7 1 1.45 0.38
 -7 7 -1 2.13 0.31
 -8 -7 -1 68.58 2.36
 8 -7 1 73.96 2.27
 8 -7 1 71.94 2.3
 8 7 1 74.1 2.45
 9 -7 1 11.23 0.67
 9 -7 1 10.14 0.6
 -9 -7 -1 10.73 1.01
 9 7 1 10.73 0.77
 10 -7 1 50.13 1.7
 10 -7 1 51.16 1.82
 10 7 1 50.43 1.92
 11 -7 1 9.86 0.62
 11 -7 1 10.13 0.72
 11 7 1 8.98 0.81
 12 -7 1 41.37 1.47
 12 -7 1 40.02 1.66
 12 7 1 42.68 1.74
 13 -7 1 6.93 0.73
 13 -7 1 6.54 0.55
 13 7 1 7.25 0.8
 14 -7 1 13.79 0.98
 14 -7 1 14.99 0.79
 14 7 1 14.31 1.07
 15 -7 1 2.04 0.55
 15 7 1 2.3 0.62
 16 -8 -1 17.82 1.2
 16 8 -1 17.48 1.23
 16 8 -1 14.91 1.33
 15 -8 -1 -0.23 0.4
 -15 8 1 0.04 0.43
 15 8 -1 1.2 0.58
 14 -8 -1 29.6 1.46
 14 8 -1 28.42 1.5
 -14 8 1 28.18 1.52
 13 -8 -1 0.31 0.23
 13 -8 -1 -0.19 0.32
 -13 8 1 -0.14 0.34
 13 8 -1 0.21 0.47
 12 -8 -1 28.09 1.08
 12 -8 -1 28.27 1.32
 -12 8 1 28.39 1.43
 12 8 -1 25.63 1.39
 11 -8 -1 0.35 0.23
 11 -8 -1 0.35 0.31
 11 8 -1 0.36 0.41
 -11 8 1 0.2 0.33
 10 -8 -1 15.72 0.75
 10 -8 -1 16.18 0.88
 10 8 -1 15.43 1.01
 -10 8 1 15.5 1.01
 9 -8 -1 0.11 0.25
 9 -8 -1 0.25 0.22
 -9 8 1 0.42 0.36
 9 8 -1 0.94 0.44
 8 -8 -1 5.37 0.47
 8 -8 -1 5.52 0.54
 -8 -8 1 5.82 0.62
 8 8 -1 5.4 0.66
 -8 8 1 4.07 0.56
 -7 -8 1 1.68 0.38
 7 -8 -1 2.36 0.35
 7 -8 -1 3.25 0.39
 -7 8 1 2.44 0.43
 -7 8 1 2.74 0.38
 7 8 -1 3.03 0.52
 6 -8 -1 3.65 0.42
 6 -8 -1 2.79 0.35
 -6 -8 1 2.59 0.41
 6 8 -1 3.04 0.49
 -6 8 1 2.81 0.41
 -6 8 1 2.8 0.47
 -5 -8 1 4.96 0.55
 5 -8 -1 4.03 0.4
 5 -8 -1 4.79 0.51
 -5 8 1 4.26 0.48
 -5 8 1 3.12 0.5
 5 8 -1 4.19 0.59
 4 -8 -1 22.92 1.05
 -4 -8 1 24.94 1.09
 -4 8 1 23.48 1.21
 4 8 -1 23.77 1.14
 -4 8 1 22.92 1.07
 3 -8 -1 21.52 1
 -3 -8 1 24.2 1.05
 3 8 -1 22.25 1.1
 -3 8 1 21.1 1.18
 -3 8 1 21.34 1.02
 2 -8 -1 80.54 2.65
 -2 -8 1 85.43 2.69
 -2 8 1 83.27 2.9
 2 8 -1 83.28 2.73
 -2 8 1 79.63 2.67
 1 -8 -1 13.2 0.76
 -1 -8 1 13.51 0.75
 -1 8 1 13.13 0.81
 1 8 -1 13.21 0.8
 0 -8 1 148.88 4.42
 0 -8 -1 143.76 4.4
 0 8 -1 150.88 4.46
 0 8 -1 150.21 4.66
 0 8 1 147.74 4.45
 -1 -8 -1 0.51 0.27
 1 -8 1 0.62 0.24
 -1 8 -1 0.31 0.27
 1 8 1 0.5 0.36
 -1 8 -1 0.32 0.33
 -2 -8 -1 114.82 3.58
 2 -8 1 115.57 3.55
 -2 8 -1 116.23 3.57
 2 8 1 117.78 3.63
 -2 8 -1 118.28 3.72
 3 -8 1 0 0.22
 -3 -8 -1 0.29 0.21
 -3 8 -1 0.61 0.28
 3 8 1 -0.03 0.25
 -3 8 -1 0.29 0.29
 4 -8 1 133.35 3.92
 4 -8 1 131.52 3.75
 -4 -8 -1 133.43 3.99
 4 8 1 129.22 4.01
 -4 8 -1 131.45 4.07
 -4 8 -1 131.81 3.93
 -5 -8 -1 10.35 0.69
 5 -8 1 11.12 0.56
 5 -8 1 10.37 0.65
 -5 8 -1 11.55 0.67
 -5 8 -1 11.34 0.8
 5 8 1 10.5 0.74
 -6 -8 -1 55.35 1.94
 6 -8 1 54.56 1.78
 6 -8 1 55.77 1.85
 -6 8 -1 55.96 2.05
 6 8 1 54.3 1.99
 -6 8 -1 53.88 1.85
 7 -8 1 4.11 0.43
 -7 -8 -1 3.18 0.46
 7 -8 1 4.85 0.45
 -7 8 -1 3.16 0.48
 -7 8 -1 4.43 0.47
 7 8 1 3.57 0.54
 8 -8 1 25.88 1.09
 -8 -8 -1 25.92 1.19
 8 -8 1 26.88 1.09
 8 8 1 27.02 1.28
 -8 8 -1 28.51 1.33
 9 -8 1 3.34 0.4
 9 -8 1 3.08 0.42
 -9 8 -1 2.94 0.52
 9 8 1 4.25 0.59
 10 -8 1 0.04 0.23
 10 -8 1 0.03 0.26
 -10 8 -1 0.26 0.37
 10 8 1 -0.12 0.39
 11 -8 1 0.01 0.24
 11 -8 1 0.11 0.29
 11 8 1 0.26 0.43
 12 -8 1 3.49 0.52
 12 -8 1 2.89 0.41
 12 8 1 2.78 0.61
 13 -8 1 -0.1 0.26
 13 -8 1 0.17 0.34
 13 8 1 -0.16 0.46
 14 -8 1 6.23 0.57
 14 -8 1 7.47 0.81
 14 8 1 7.18 0.9
 15 -8 1 0.19 0.42
 -15 8 -1 1.01 0.56
 15 8 1 -0.14 0.54
 15 -9 -1 0.41 0.45
 15 9 -1 0.81 0.57
 -15 9 1 -0.28 0.46
 14 -9 -1 1.18 0.48
 14 9 -1 1.31 0.62
 -14 9 1 1.83 0.6
 13 -9 -1 0.28 0.26
 13 -9 -1 0.64 0.4
 13 9 -1 0.2 0.52
 -13 9 1 0.78 0.47
 12 -9 -1 16.23 0.97
 12 -9 -1 14.05 0.77
 -12 9 1 14.61 1.08
 12 9 -1 14.27 1.16
 11 -9 -1 4.93 0.49
 11 -9 -1 4.38 0.59
 11 9 -1 3.49 0.69
 -11 9 1 5.53 0.78
 10 -9 -1 55.94 1.89
 10 -9 -1 56.48 2.02
 -10 9 1 53.03 2.18
 10 9 -1 56.91 2.22
 9 -9 -1 0.56 0.26
 9 -9 -1 -0.16 0.24
 9 9 -1 0.11 0.42
 -9 9 1 -0.05 0.31
 -8 -9 1 82.92 2.82
 8 -9 -1 84.99 2.65
 8 -9 -1 81.96 2.64
 -8 9 1 85.51 2.92
 8 9 -1 78.19 2.87
 7 -9 -1 15.2 0.78
 -7 -9 1 13.59 0.87
 7 -9 -1 15.03 0.8
 7 9 -1 13.04 0.95
 -7 9 1 13.06 0.78
 -7 9 1 12.72 0.95
 -6 -9 1 92.02 3
 6 -9 -1 94.31 2.94
 6 -9 -1 88.86 2.81
 -6 9 1 91.53 3.13
 -6 9 1 90.48 2.92
 6 9 -1 92.67 3.07
 -5 -9 1 7.82 0.7
 5 -9 -1 5.54 0.58
 5 9 -1 6.52 0.72
 -5 9 1 6.79 0.75
 -5 9 1 5.73 0.6
 4 -9 -1 86.14 2.93
 -4 -9 1 92.31 2.97
 -4 9 1 88.35 2.96
 -4 9 1 92.36 3.17
 4 9 -1 97.8 3.07
 -3 -9 1 6.25 0.62
 3 -9 -1 6.64 0.63
 -3 9 1 8.49 0.86
 -3 9 1 5.81 0.63
 3 9 -1 7.25 0.73
 -2 -9 1 67.99 2.29
 2 -9 -1 67.46 2.28
 -2 9 1 67.3 2.53
 -2 9 1 64.49 2.3
 2 9 -1 64.25 2.32
 -1 -9 1 0.09 0.22
 1 -9 -1 -0.2 0.21
 -1 9 1 -0.61 0.28
 1 9 -1 0.42 0.35
 0 -9 1 15.95 0.88
 0 -9 -1 15.04 0.83
 0 9 -1 15.47 1.03
 0 9 -1 13.79 0.91
 0 9 1 14.48 0.91
 1 -9 1 6.2 0.62
 -1 -9 -1 5.09 0.55
 -1 9 -1 4.15 0.63
 1 9 1 4.89 0.57
 -1 9 -1 5.45 0.62
 2 -9 1 1.03 0.3
 -2 -9 -1 0.64 0.31
 -2 9 -1 0.36 0.34
 -2 9 -1 0.86 0.32
 2 9 1 0.86 0.39
 -3 -9 -1 3.94 0.52
 3 -9 1 3.13 0.44
 -3 9 -1 2.28 0.42
 -3 9 -1 3.22 0.55
 3 9 1 3.55 0.56
 4 -9 1 14.85 0.67
 4 -9 1 17.39 0.89
 -4 -9 -1 15.9 0.9
 4 9 1 16.35 1
 -4 9 -1 17.87 1.05
 -4 9 -1 15.86 0.89
 5 -9 1 -0.03 0.22
 5 -9 1 0.43 0.2
 -5 -9 -1 0.02 0.25
 -5 9 -1 0.17 0.3
 -5 9 -1 0.2 0.28
 5 9 1 0.46 0.36
 6 -9 1 49.13 1.75
 -6 -9 -1 47.55 1.82
 6 -9 1 50 1.63
 -6 9 -1 47.97 1.93
 -6 9 -1 47.43 1.74
 6 9 1 46.25 1.87
 -7 -9 -1 -0.02 0.25
 7 -9 1 0.07 0.24
 7 -9 1 0.27 0.23
 -7 9 -1 0.19 0.27
 7 9 1 0.42 0.38
 -7 9 -1 -0.33 0.28
 -8 -9 -1 88.62 2.9
 8 -9 1 86.46 2.75
 8 -9 1 83.08 2.7
 -8 9 -1 85.71 2.99
 8 9 1 86.17 2.94
 9 -9 1 7.59 0.6
 9 -9 1 8.22 0.62
 -9 9 -1 6.59 0.76
 9 9 1 6.3 0.75
 10 -9 1 77.56 2.55
 10 -9 1 78.75 2.61
 10 9 1 77.54 2.8
 -10 9 -1 80.53 2.87
 11 -9 1 9.14 0.71
 11 -9 1 8.67 0.65
 11 9 1 9.55 0.97
 -11 9 -1 9.69 0.94
 12 -9 1 48.8 1.77
 12 -9 1 49.47 1.91
 12 9 1 47.97 2.07
 -12 9 -1 52.15 2.17
 13 -9 1 6.21 0.73
 13 -9 1 6.55 0.6
 13 9 1 5.38 0.82
 -13 9 -1 7.98 0.95
 14 -9 1 19.2 0.95
 14 -9 1 18.51 1.13
 -14 9 -1 17.81 1.3
 14 9 1 15.73 1.27
 15 -10 -1 0.58 0.48
 -15 10 1 0.5 0.56
 14 -10 -1 39.59 1.73
 -14 10 1 33.68 1.85
 14 10 -1 40.37 1.88
 13 -10 -1 1.14 0.45
 13 -10 -1 1.06 0.34
 -13 10 1 0.23 0.47
 13 10 -1 1.44 0.62
 12 -10 -1 45.4 1.82
 12 -10 -1 44.83 1.64
 12 10 -1 44.44 2.02
 -12 10 1 44.1 2.02
 11 -10 -1 0.36 0.34
 11 -10 -1 0.12 0.29
 11 10 -1 0.79 0.51
 -11 10 1 -0.16 0.42
 10 -10 -1 34.53 1.43
 10 -10 -1 38.74 1.54
 -10 10 1 36.1 1.75
 10 10 -1 37.3 1.73
 9 -10 -1 -0.07 0.27
 9 -10 -1 0.66 0.31
 9 10 -1 0.11 0.45
 -9 10 1 -0.17 0.36
 8 -10 -1 1.59 0.37
 8 -10 -1 2.09 0.4
 -8 -10 1 2.74 0.51
 8 10 -1 2.09 0.56
 -8 10 1 2.36 0.55
 7 -10 -1 1.64 0.35
 -7 -10 1 1.51 0.4
 7 -10 -1 1.17 0.35
 7 10 -1 0.97 0.46
 -7 10 1 1.24 0.47
 -6 -10 1 3.6 0.54
 6 -10 -1 3.7 0.51
 6 10 -1 3.92 0.62
 -6 10 1 2.32 0.45
 -6 10 1 3.25 0.63
 -5 -10 1 4.61 0.57
 5 -10 -1 5.88 0.62
 -5 10 1 4.3 0.56
 -5 10 1 4.25 0.66
 5 10 -1 5.46 0.68
 4 -10 -1 44.06 1.75
 -4 -10 1 46.2 1.76
 4 10 -1 46.72 1.85
 -4 10 1 43.1 1.76
 -4 10 1 41.51 1.9
 3 -10 -1 15.33 0.92
 -3 -10 1 13.83 0.88
 -3 10 1 14.71 1.11
 -3 10 1 15.29 0.97
 3 10 -1 15.18 1.01
 2 -10 -1 115.27 3.64
 -2 -10 1 111.5 3.62
 -2 10 1 114.76 3.68
 2 10 -1 118.3 3.71
 -1 -10 1 16.09 0.94
 1 -10 -1 15.65 0.92
 -1 10 1 16.55 1.02
 1 10 -1 15.94 1.03
 0 -10 -1 176.4 5.43
 0 -10 1 183.4 5.47
 0 10 1 188.79 5.52
 0 10 -1 184.61 5.52
 1 -10 1 0.78 0.3
 -1 -10 -1 0.22 0.26
 -1 10 -1 1.1 0.41
 1 10 1 0.4 0.37
 -1 10 -1 0.31 0.42
 -2 -10 -1 173.29 5.12
 2 -10 1 164.83 5.09
 -2 10 -1 169.29 5.14
 -2 10 -1 167.2 5.32
 2 10 1 174.75 5.18
 3 -10 1 0.38 0.28
 -3 -10 -1 0.09 0.28
 -3 10 -1 0 0.37
 3 10 1 -0.09 0.39
 -3 10 -1 0.13 0.31
 4 -10 1 84.07 2.81
 -4 -10 -1 83.41 2.85
 4 10 1 82.11 2.91
 -4 10 -1 88.01 3.04
 -4 10 -1 86.37 2.85
 5 -10 1 5.52 0.46
 -5 -10 -1 5.58 0.62
 5 -10 1 6.04 0.61
 -5 10 -1 6.36 0.64
 5 10 1 5.37 0.68
 -5 10 -1 5.58 0.73
 6 -10 1 60.49 1.95
 6 -10 1 60.84 2.14
 -6 -10 -1 59.84 2.2
 -6 10 -1 58.81 2.31
 6 10 1 61.74 2.28
 -6 10 -1 57.71 2.13
 -7 -10 -1 10.2 0.81
 7 -10 1 10.48 0.64
 7 -10 1 9.83 0.72
 -7 10 -1 12 0.96
 7 10 1 12.29 1.04
 -8 -10 -1 20.87 1.15
 8 -10 1 20.64 0.97
 8 -10 1 20.98 1.05
 8 10 1 19.88 1.23
 -8 10 -1 21.88 1.28
 9 -10 1 5.28 0.56
 9 -10 1 5.06 0.56
 -9 10 -1 4.79 0.73
 9 10 1 4.89 0.73
 10 -10 1 2.33 0.43
 10 -10 1 1.73 0.47
 -10 10 -1 2.05 0.6
 10 10 1 0.97 0.54
 11 -10 1 0.73 0.33
 11 10 1 0.63 0.55
 -11 10 -1 1.48 0.55
 12 -10 1 1.33 0.38
 -12 10 -1 2 0.63
 12 10 1 1.91 0.65
 13 -10 1 0.01 0.3
 13 10 1 0.18 0.6
 -13 10 -1 0.1 0.47
 14 -10 1 16.62 0.94
 14 10 1 16.63 1.4
 -14 10 -1 16.16 1.3
 14 -11 -1 0.22 0.39
 14 11 -1 0.85 0.65
 -14 11 1 0.89 0.58
 13 -11 -1 2.4 0.44
 13 11 -1 1.8 0.65
 -13 11 1 2.94 0.72
 12 -11 -1 16.76 0.96
 -12 11 1 17.22 1.3
 12 11 -1 16.46 1.27
 11 -11 -1 0.81 0.36
 11 -11 -1 0.49 0.36
 -11 11 1 1.22 0.54
 11 11 -1 1.54 0.6
 10 -11 -1 56.05 2.02
 10 -11 -1 55.43 1.99
 -10 11 1 50.89 2.28
 10 11 -1 49.01 2.18
 9 -11 -1 13.32 0.86
 9 -11 -1 13.61 0.88
 -9 11 1 13.86 1.13
 9 11 -1 13.8 1.09
 -8 -11 1 90.35 3.09
 8 -11 -1 91.25 2.92
 8 -11 -1 87.74 3
 -8 11 1 89.56 3.3
 8 11 -1 94.38 3.21
 7 -11 -1 6.25 0.67
 -7 -11 1 7.16 0.74
 7 11 -1 7.28 0.82
 -7 11 1 8.51 0.98
 -6 -11 1 118.87 3.79
 6 -11 -1 120.23 3.79
 -6 11 1 114.12 4.01
 6 11 -1 118.42 3.87
 -6 11 1 117.85 3.79
 -5 -11 1 7.7 0.75
 5 -11 -1 6.1 0.68
 -5 11 1 8.31 0.79
 -5 11 1 7.78 0.93
 5 11 -1 8.61 0.87
 -4 -11 1 61.3 2.25
 4 -11 -1 61.49 2.27
 -4 11 1 66.18 2.34
 4 11 -1 62.08 2.36
 -4 11 1 57.36 2.47
 3 -11 -1 0.01 0.28
 -3 -11 1 -0.01 0.29
 -3 11 1 0.21 0.46
 3 11 -1 -0.19 0.41
 -3 11 1 -0.28 0.35
 -2 -11 1 74.56 2.6
 2 -11 -1 75.93 2.62
 -2 11 1 74.65 2.66
 2 11 -1 72.88 2.65
 1 -11 -1 0.23 0.29
 -1 -11 1 -0.09 0.25
 1 11 -1 -0.41 0.39
 -1 11 1 0.21 0.4
 0 -11 -1 9.15 0.81
 0 -11 1 7.13 0.71
 0 11 -1 6.84 0.75
 0 11 1 8.24 0.83
 -1 -11 -1 1.01 0.35
 1 -11 1 0.78 0.32
 -1 11 -1 0.57 0.48
 -1 11 -1 0.56 0.39
 1 11 1 1.39 0.49
 2 -11 1 -0.2 0.29
 -2 -11 -1 0.35 0.32
 -2 11 -1 1.02 0.5
 2 11 1 0.32 0.44
 -2 11 -1 0.21 0.38
 -3 -11 -1 9.53 0.83
 3 -11 1 7.43 0.72
 3 11 1 8.79 0.87
 -3 11 -1 7.34 0.88
 -3 11 -1 6.78 0.71
 4 -11 1 25.66 1.23
 -4 -11 -1 23.84 1.25
 4 11 1 27.23 1.4
 -4 11 -1 25.53 1.27
 -4 11 -1 23.19 1.37
 -5 -11 -1 0.38 0.31
 5 -11 1 -0.09 0.3
 -5 11 -1 -0.03 0.36
 -5 11 -1 0.78 0.41
 5 11 1 0.54 0.44
 -6 -11 -1 35.83 1.62
 6 -11 1 39.54 1.61
 -6 11 -1 37.16 1.78
 -6 11 -1 37.2 1.61
 6 11 1 39.65 1.77
 -7 -11 -1 5.17 0.68
 7 -11 1 3.9 0.55
 -7 11 -1 4.68 0.74
 7 11 1 2.35 0.63
 8 -11 1 81.85 2.78
 -8 -11 -1 84.97 2.94
 -8 11 -1 80.36 3.05
 8 11 1 80.09 2.98
 9 -11 1 6.86 0.69
 9 11 1 5.26 0.78
 -9 11 -1 5.76 0.83
 10 -11 1 73.99 2.58
 10 11 1 74.71 2.86
 -10 11 -1 75.56 2.93
 11 -11 1 10.89 0.82
 -11 11 -1 9.51 1.04
 11 11 1 11.32 1.14
 12 -11 1 59.17 2.15
 -12 11 -1 58.48 2.55
 12 11 1 59.49 2.53
 13 -11 1 5.45 0.63
 -13 11 -1 4.73 0.85
 13 11 1 8.19 1.03
 13 -12 -1 0.19 0.35
 13 12 -1 0.49 0.61
 -13 12 1 -0.09 0.55
 12 -12 -1 45.02 1.8
 -12 12 1 46.03 2.27
 12 12 -1 46.35 2.12
 11 -12 -1 0.03 0.36
 -11 12 1 0.02 0.5
 11 12 -1 -0.31 0.52
 10 -12 -1 28.58 1.38
 -10 12 1 27.65 1.68
 10 12 -1 31.42 1.64
 9 -12 -1 0.94 0.43
 -9 12 1 0.68 0.53
 9 12 -1 0.27 0.54
 -8 -12 1 6.03 0.71
 8 -12 -1 6.58 0.74
 -8 12 1 5.63 0.88
 8 12 -1 7.07 0.85
 7 -12 -1 2.11 0.5
 -7 -12 1 2.21 0.5
 7 12 -1 2.26 0.62
 -7 12 1 2.23 0.66
 6 -12 -1 3.05 0.54
 -6 -12 1 3.77 0.59
 -6 12 1 5.12 0.85
 6 12 -1 1.93 0.62
 -6 12 1 3.09 0.57
 5 -12 -1 14.78 0.99
 -5 -12 1 16.73 0.99
 -5 12 1 13.43 1.12
 -5 12 1 13.78 1.01
 5 12 -1 14.94 1.05
 -4 -12 1 36.52 1.6
 4 -12 -1 39.51 1.67
 -4 12 1 35.63 1.68
 -4 12 1 36.51 1.89
 4 12 -1 37.75 1.7
 -3 -12 1 5.21 0.67
 3 -12 -1 2.35 0.47
 -3 12 1 4.07 0.62
 3 12 -1 4.25 0.71
 -2 -12 1 73.26 2.65
 2 -12 -1 74.63 2.67
 2 12 -1 76.38 2.75
 -2 12 1 75.65 2.74
 -1 -12 1 12.43 0.87
 1 -12 -1 13.72 0.88
 -1 12 1 9.64 0.91
 1 12 -1 12.75 0.97
 0 -12 -1 134.64 4.32
 0 -12 1 137.67 4.36
 0 12 1 137.33 4.4
 0 12 -1 143.22 4.46
 1 -12 1 12.25 0.9
 -1 -12 -1 11.18 0.94
 -1 12 -1 10.09 1.05
 1 12 1 12.01 1.05
 -1 12 -1 12.76 1
 2 -12 1 78.38 2.74
 -2 -12 -1 79.77 2.73
 -2 12 -1 78.68 2.8
 -2 12 -1 75.59 2.98
 2 12 1 72.16 2.76
 -3 -12 -1 0.46 0.32
 3 -12 1 0.83 0.38
 3 12 1 0.29 0.42
 -3 12 -1 -0.05 0.39
 -3 12 -1 0.16 0.44
 -4 -12 -1 112.37 3.59
 4 -12 1 107.54 3.58
 4 12 1 108.56 3.64
 -4 12 -1 103.69 3.79
 -4 12 -1 107.42 3.62
 -5 -12 -1 5.79 0.73
 5 -12 1 5.21 0.68
 5 12 1 4.37 0.75
 -5 12 -1 5.38 0.83
 -5 12 -1 5.97 0.74
 -6 -12 -1 48.44 1.99
 6 -12 1 47.45 1.93
 -6 12 -1 46.33 1.96
 6 12 1 47.43 2.07
 -6 12 -1 46.19 2.17
 7 -12 1 10.71 0.93
 -7 -12 -1 13.52 0.98
 -7 12 -1 9.63 1.04
 7 12 1 8.96 0.97
 -8 -12 -1 19.15 1.18
 8 -12 1 15.27 1.05
 -8 12 -1 17.63 1.31
 8 12 1 15.72 1.25
 9 -12 1 4.41 0.64
 -9 12 -1 5.01 0.83
 9 12 1 3.93 0.8
 10 -12 1 1.72 0.5
 10 12 1 2.72 0.76
 -10 12 -1 1.08 0.56
 11 -12 1 1.41 0.48
 11 12 1 1 0.66
 -11 12 -1 2.67 0.72
 12 -12 1 5.04 0.65
 12 12 1 4.45 0.91
 -12 12 -1 3.97 0.85
 12 -13 -1 14.58 1
 12 13 -1 16.68 1.37
 -12 13 1 13.53 1.4
 11 -13 -1 2.55 0.56
 11 13 -1 2.15 0.75
 -11 13 1 2.03 0.76
 10 -13 -1 72.26 2.57
 -10 13 1 65.2 2.89
 10 13 -1 65.57 2.69
 9 -13 -1 3.26 0.6
 9 13 -1 4.32 0.82
 -9 13 1 4.95 0.91
 -8 -13 1 92.23 3.22
 8 -13 -1 89.53 3.19
 -8 13 1 92.97 3.54
 8 13 -1 91.17 3.32
 7 -13 -1 7.81 0.83
 -7 -13 1 8.68 0.85
 7 13 -1 6.72 0.87
 -7 13 1 7.75 0.99
 6 -13 -1 125.95 4.15
 -6 -13 1 131.93 4.15
 -6 13 1 123.84 4.42
 6 13 -1 125.89 4.21
 5 -13 -1 3.78 0.62
 -5 -13 1 5.22 0.68
 -5 13 1 4.45 0.71
 5 13 -1 3.89 0.73
 -5 13 1 4.14 0.8
 -4 -13 1 130.22 4.17
 4 -13 -1 131.85 4.19
 -4 13 1 125.54 4.21
 4 13 -1 128.36 4.23
 -4 13 1 130.57 4.5
 3 -13 -1 0.56 0.37
 -3 -13 1 -0.3 0.31
 3 13 -1 -0.61 0.43
 -3 13 1 0.73 0.45
 2 -13 -1 22.12 1.23
 -2 -13 1 23.34 1.24
 -2 13 1 22.12 1.28
 2 13 -1 23.39 1.33
 -1 -13 1 1.08 0.43
 1 -13 -1 1.92 0.43
 -1 13 1 1.56 0.5
 1 13 -1 1.24 0.51
 0 -13 1 11.15 0.98
 0 -13 -1 9.05 0.83
 0 13 1 9.92 0.92
 0 13 -1 10.29 1
 -1 -13 -1 5.11 0.65
 1 -13 1 4.8 0.68
 1 13 1 5.3 0.73
 -1 13 -1 8.45 0.92
 2 -13 1 0.84 0.38
 -2 -13 -1 1.63 0.43
 2 13 1 2.27 0.58
 -2 13 -1 1.21 0.58
 -2 13 -1 0.99 0.47
 3 -13 1 3.43 0.59
 -3 -13 -1 3.86 0.6
 -3 13 -1 3.57 0.67
 -3 13 -1 3.28 0.78
 3 13 1 3.16 0.66
 4 -13 1 17.16 1.08
 -4 -13 -1 16.75 1.06
 -4 13 -1 18.09 1.16
 4 13 1 16.48 1.15
 -4 13 -1 16.96 1.35
 -5 -13 -1 2.27 0.53
 5 -13 1 1.35 0.48
 -5 13 -1 2.1 0.62
 -5 13 -1 1.07 0.6
 5 13 1 1.57 0.58
 6 -13 1 38.87 1.77
 -6 -13 -1 39.68 1.77
 -6 13 -1 39.15 2.03
 6 13 1 35.91 1.82
 -7 -13 -1 0.08 0.41
 7 -13 1 0.23 0.39
 -7 13 -1 0.27 0.54
 7 13 1 -0.68 0.47
 8 -13 1 64.64 2.48
 -8 -13 -1 64.77 2.55
 8 13 1 63.42 2.64
 -8 13 -1 65.54 2.8
 9 -13 1 1.61 0.52
 9 13 1 1.83 0.67
 -9 13 -1 2.18 0.69
 10 -13 1 72.25 2.57
 -10 13 -1 65.93 2.88
 10 13 1 59.28 2.68
 11 -13 1 2.28 0.55
 11 13 1 2.27 0.77
 -11 13 -1 3 0.75
 12 -13 1 47.03 1.94
 -12 13 -1 43.8 2.31
 12 13 1 42.77 2.24
 -12 14 1 39.04 2.23
 11 -14 -1 1.88 0.56
 11 14 -1 1.95 0.76
 -11 14 1 2.51 0.83
 10 -14 -1 27.11 1.53
 -10 14 1 32.65 1.96
 10 14 -1 31.1 1.75
 9 -14 -1 3.9 0.68
 -9 14 1 6.12 1.06
 9 14 -1 4.81 0.84
 8 -14 -1 4.07 0.7
 -8 -14 1 4.13 0.73
 -8 14 1 5.8 0.98
 8 14 -1 3.83 0.79
 -7 -14 1 6.3 0.8
 7 -14 -1 6.03 0.77
 7 14 -1 5.05 0.83
 -7 14 1 5.8 1
 6 -14 -1 7.79 0.88
 -6 -14 1 5.25 0.73
 6 14 -1 3.68 0.74
 -6 14 1 6.27 0.93
 -5 -14 1 8.98 0.89
 5 -14 -1 7.46 0.84
 -5 14 1 9.42 1.1
 -5 14 1 8.06 0.91
 5 14 -1 6.99 0.92
 4 -14 -1 40.53 1.79
 -4 -14 1 38.26 1.75
 4 14 -1 36.08 1.79
 -4 14 1 39.7 1.86
 3 -14 -1 21.16 1.26
 -3 -14 1 22.62 1.28
 -3 14 1 25.45 1.42
 3 14 -1 20.96 1.32
 -2 -14 1 70.92 2.71
 2 -14 -1 73.62 2.74
 2 14 -1 78.18 2.87
 -2 14 1 75.45 2.82
 -1 -14 1 9.13 0.92
 1 -14 -1 7.79 0.84
 -1 14 1 7.66 0.93
 1 14 -1 8.73 0.98
 0 -14 -1 89.39 3.15
 0 -14 1 86.99 3.15
 0 14 1 89.87 3.23
 0 14 -1 94.13 3.29
 -1 -14 -1 1.5 0.47
 1 -14 1 0.91 0.45
 1 14 1 0.8 0.55
 -1 14 -1 1.87 0.62
 2 -14 1 105.58 3.59
 -2 -14 -1 101.85 3.52
 -2 14 -1 105.93 3.65
 2 14 1 102.34 3.62
 3 -14 1 0.26 0.38
 -3 -14 -1 0.9 0.45
 -3 14 -1 0.93 0.55
 -3 14 -1 0.27 0.57
 3 14 1 0.95 0.57
 4 -14 1 91.32 3.19
 -4 -14 -1 88.58 3.11
 4 14 1 86.1 3.19
 -4 14 -1 89.59 3.24
 -4 14 -1 83.92 3.4
 5 -14 1 2.52 0.6
 -5 -14 -1 2.61 0.58
 -5 14 -1 2.91 0.7
 -5 14 -1 3.28 0.8
 5 14 1 4.59 0.8
 -6 -14 -1 48.42 2.02
 6 -14 1 44.43 2.03
 6 14 1 45.74 2.08
 -6 14 -1 44.39 2.31
 7 -14 1 4 0.71
 -7 -14 -1 5.86 0.79
 -7 14 -1 4.79 0.9
 7 14 1 4.83 0.82
 -8 -14 -1 14.86 1.16
 8 -14 1 19.4 1.24
 8 14 1 17.29 1.36
 -8 14 -1 17.22 1.62
 9 -14 1 5.36 0.79
 9 14 1 5.18 0.91
 -9 14 -1 5.66 1.01
 10 -14 1 1.4 0.59
 10 14 1 2.02 0.75
 -10 14 -1 1.1 0.75
 11 -14 1 2.39 0.64
 -11 14 -1 3.73 0.89
 11 14 1 1.82 0.79
 10 -15 -1 42.6 1.97
 -10 15 1 39.32 2.32
 10 15 -1 44.93 2.16
 9 -15 -1 4.85 0.77
 -9 15 1 4.18 0.92
 9 15 -1 6.3 0.96
 8 -15 -1 90.51 3.28
 8 15 -1 87.68 3.34
 -8 15 1 89.14 3.63
 -7 -15 1 2.34 0.55
 7 -15 -1 1.39 0.54
 7 15 -1 1.53 0.63
 -7 15 1 2.55 0.83
 -6 -15 1 121.44 4.01
 6 -15 -1 116.63 4.02
 6 15 -1 116.86 4.09
 -6 15 1 118.78 4.36
 5 -15 -1 2.39 0.56
 -5 -15 1 3.47 0.67
 5 15 -1 2.61 0.73
 -4 -15 1 66.95 2.64
 4 -15 -1 70.58 2.69
 4 15 -1 71.37 2.75
 -4 15 1 70.11 2.76
 -3 -15 1 1.07 0.42
 3 -15 -1 0.57 0.38
 -3 15 1 1.21 0.51
 3 15 -1 1.11 0.59
 -2 -15 1 46.53 2
 2 -15 -1 45.01 1.94
 -2 15 1 45.8 2.03
 2 15 -1 43.3 2.02
 -1 -15 1 1.49 0.5
 1 -15 -1 1.04 0.47
 -1 15 1 0.85 0.58
 1 15 -1 1.5 0.64
 0 -15 -1 6.64 0.78
 0 -15 1 6.83 0.81
 0 15 -1 7.32 0.91
 0 15 1 5.06 0.81
 -1 -15 -1 3.5 0.64
 1 -15 1 2.57 0.55
 -1 15 -1 1.88 0.6
 1 15 1 4.43 0.81
 -2 -15 -1 -0.63 0.32
 2 -15 1 0.15 0.4
 2 15 1 0.64 0.53
 -2 15 -1 0.03 0.49
 3 -15 1 2.42 0.56
 -3 -15 -1 2.83 0.6
 3 15 1 2.62 0.74
 -3 15 -1 2.39 0.66
 4 -15 1 13.8 1.17
 -4 -15 -1 11.11 1.04
 -4 15 -1 14.46 1.27
 -4 15 -1 11.72 1.29
 4 15 1 10.28 1.1
 -5 -15 -1 1.01 0.51
 5 -15 1 0.16 0.43
 5 15 1 -0.11 0.55
 -5 15 -1 0.02 0.62
 6 -15 1 27.91 1.54
 -6 -15 -1 29.81 1.54
 -6 15 -1 22.78 1.69
 6 15 1 25.34 1.54
 -7 -15 -1 0.16 0.43
 7 -15 1 0.41 0.49
 -7 15 -1 1.04 0.64
 7 15 1 0.43 0.62
 8 -15 1 35.92 1.85
 8 15 1 33.26 1.9
 -8 15 -1 36.45 2.17
 9 -15 1 2.77 0.69
 -9 15 -1 4.03 0.98
 9 15 1 4.43 0.91
 -10 15 -1 52.23 2.71
 9 -16 -1 3.84 0.75
 9 16 -1 3.5 0.84
 -9 16 1 2.44 0.88
 8 -16 -1 2.01 0.6
 -8 16 1 2.39 0.84
 8 16 -1 2.63 0.76
 -7 -16 1 8.15 0.92
 7 -16 -1 7.43 0.9
 7 16 -1 6.76 0.97
 -7 16 1 8.01 1.23
 -6 -16 1 1.52 0.54
 6 -16 -1 1.69 0.56
 6 16 -1 1.93 0.73
 -5 -16 1 12.51 1.14
 5 -16 -1 10.76 1.06
 5 16 -1 11.85 1.2
 4 -16 -1 29.6 1.58
 -4 -16 1 27.58 1.54
 -4 16 1 29.53 1.66
 4 16 -1 30.19 1.66
 3 -16 -1 4.5 0.7
 -3 -16 1 4.44 0.75
 3 16 -1 6.17 0.89
 -3 16 1 6.51 0.89
 -2 -16 1 51.73 2.24
 2 -16 -1 57.4 2.3
 -2 16 1 55.39 2.38
 2 16 -1 52.91 2.37
 -1 -16 1 4.94 0.73
 1 -16 -1 5.13 0.73
 1 16 -1 4.08 0.78
 -1 16 1 4.3 0.79
 0 -16 1 68.83 2.67
 0 -16 -1 72.1 2.71
 0 16 -1 68.33 2.79
 0 16 1 69.16 2.78
 1 -16 1 1.17 0.47
 -1 -16 -1 1.89 0.55
 -1 16 -1 2.1 0.64
 1 16 1 3.3 0.75
 2 -16 1 71.1 2.76
 -2 -16 -1 66.44 2.69
 2 16 1 71.66 2.84
 -2 16 -1 73.64 2.87
 3 -16 1 0.29 0.46
 -3 -16 -1 0.54 0.42
 3 16 1 1.49 0.67
 -3 16 -1 1.49 0.65
 -4 -16 -1 47.92 2.08
 4 -16 1 45.86 2.11
 -4 16 -1 45.64 2.2
 4 16 1 46.2 2.2
 5 -16 1 2 0.6
 -5 -16 -1 2.05 0.6
 5 16 1 1.17 0.72
 -5 16 -1 0.3 0.7
 -6 -16 -1 28.22 1.56
 6 -16 1 31.06 1.69
 6 16 1 29.28 1.76
 -6 16 -1 27.02 1.96
 7 -16 1 3.1 0.73
 -7 -16 -1 3.64 0.74
 -7 16 -1 3.74 1.02
 7 16 1 2.52 0.81
 8 -16 1 8.06 1
 8 16 1 9.31 1.17
 -8 16 -1 8.64 1.25
 -7 -17 1 -0.23 0.47
 7 -17 -1 0.57 0.52
 7 17 -1 0.22 0.67
 -6 -17 1 74.31 2.9
 6 -17 -1 78.18 2.97
 6 17 -1 69.87 2.98
 5 -17 -1 -0.04 0.47
 -5 -17 1 0.79 0.51
 5 17 -1 0.95 0.68
 -4 -17 1 65.7 2.65
 4 -17 -1 66.58 2.68
 4 17 -1 68.34 2.81
 3 -17 -1 0.18 0.47
 -3 -17 1 -0.2 0.43
 -3 17 1 0.12 0.55
 3 17 -1 0.2 0.63
 -2 -17 1 23.92 1.46
 2 -17 -1 23.35 1.41
 -2 17 1 23.81 1.48
 2 17 -1 24.22 1.59
 1 -17 -1 4.44 0.7
 -1 -17 1 5.24 0.8
 -1 17 1 5.22 0.85
 1 17 -1 6.14 0.94
 0 -17 1 2.04 0.59
 0 -17 -1 3.27 0.67
 0 17 1 2.98 0.74
 0 17 -1 2.62 0.71
 -1 -17 -1 1.43 0.5
 1 -17 1 0.71 0.48
 1 17 1 0.57 0.62
 -1 17 -1 0.85 0.54
 2 -17 1 1.55 0.57
 -2 -17 -1 1.1 0.5
 2 17 1 0.36 0.62
 -2 17 -1 0.94 0.63
 3 -17 1 4.44 0.77
 -3 -17 -1 3.8 0.73
 -3 17 -1 4.22 0.85
 3 17 1 2.91 0.8
 4 -17 1 8.32 1
 -4 -17 -1 6.35 0.86
 -4 17 -1 9.09 1.39
 4 17 1 7.39 0.98
 -5 -17 -1 2.59 0.66
 5 -17 1 2.96 0.68
 5 17 1 1.99 0.73
 6 -17 1 19.66 1.41
 -6 -17 -1 19.12 1.37
 -6 17 -1 20.83 1.79
 6 17 1 17.29 1.52
 -7 17 -1 0.25 0.76
 5 -18 -1 11.39 1.15
 -5 -18 1 13.11 1.18
 5 18 -1 13.82 1.32
 -4 -18 1 10.27 1.05
 4 -18 -1 14.93 1.27
 4 18 -1 13.48 1.31
 -3 -18 1 5.4 0.82
 3 -18 -1 5.38 0.81
 3 18 -1 6.39 1
 -3 18 1 8.14 1.02
 -2 -18 1 42.41 2.01
 2 -18 -1 43.5 2.02
 -2 18 1 41.54 2.12
 2 18 -1 40.62 2.06
 1 -18 -1 6.47 0.87
 -1 -18 1 6.65 0.87
 -1 18 1 6.87 1.01
 1 18 -1 5.57 0.89
 0 -18 1 49.35 2.18
 0 -18 -1 45.97 2.13
 0 18 -1 44.49 2.24
 0 18 1 45.53 2.24
 -1 -18 -1 0.14 0.48
 1 -18 1 -0.1 0.47
 -1 18 -1 0.14 0.58
 1 18 1 1.03 0.61
 2 -18 1 50.12 2.24
 -2 -18 -1 46.68 2.18
 -2 18 -1 47.68 2.33
 3 -18 1 -0.19 0.48
 -3 -18 -1 0.65 0.54
 -3 18 -1 1.55 0.75
 3 18 1 -0.12 0.65
 -4 -18 -1 30.89 1.74
 4 -18 1 32.86 1.78
 4 18 1 30.84 1.88
 18 0 -2 31.49 1.79
 17 0 -2 0.35 0.54
 16 0 -2 94.3 3.37
 15 0 -2 0.35 0.38
 14 0 -2 135.81 4.32
 13 0 -2 0.12 0.17
 13 0 -2 0.11 0.32
 12 0 -2 140.51 3.96
 12 0 -2 144.91 4.38
 11 0 -2 -0.18 0.12
 11 0 -2 0.08 0.24
 10 0 -2 149.01 4.45
 10 0 -2 151.95 4.14
 9 0 -2 0.02 0.09
 9 0 -2 -0.33 0.17
 8 0 -2 35.39 1.03
 8 0 -2 34.62 1.26
 7 0 -2 0.07 0.07
 7 0 -2 0.25 0.17
 7 0 -2 -0.07 0.26
 6 0 -2 13.62 0.42
 6 0 -2 14.32 0.6
 6 0 -2 12.38 0.78
 5 0 -2 0.41 0.25
 5 0 -2 0.38 0.13
 5 0 -2 0.33 0.06
 4 0 -2 5.14 0.48
 4 0 -2 6.23 0.32
 3 0 -2 0.25 0.09
 3 0 -2 0.2 0.18
 2 0 -2 159.18 4.65
 2 0 -2 170.94 4.44
 2 0 -2 166.32 4.5
 1 0 -2 0.06 0.03
 0 0 -2 464.49 12.54
 0 0 2 452.79 12.5
 1 0 2 0.24 0.07
 -1 0 -2 0.09 0.07
 2 0 2 563.35 15.48
 -2 0 -2 575.07 15.4
 -3 0 -2 0.1 0.08
 3 0 2 0.1 0.09
 -4 0 -2 418.75 11.18
 4 0 2 413.82 11.18
 5 0 2 -0.03 0.1
 -5 0 -2 0.16 0.1
 -6 0 -2 500.15 13.59
 6 0 2 511.69 13.6
 -7 0 -2 0.16 0.12
 7 0 2 -0.02 0.12
 8 0 2 223.67 6.1
 -8 0 -2 217.06 6.09
 9 0 2 0.3 0.18
 10 0 2 38.02 1.33
 11 0 2 -0.1 0.18
 12 0 2 0.97 0.3
 13 0 2 0.1 0.24
 14 0 2 16.36 0.86
 14 0 2 15.92 1.14
 15 0 2 -0.36 0.44
 15 0 2 0.35 0.3
 16 0 2 27.62 1.58
 18 -1 -2 60.02 2.59
 18 1 -2 61.49 2.64
 17 -1 -2 0.16 0.52
 17 1 -2 1.32 0.59
 16 -1 -2 33.21 1.68
 16 1 -2 32.79 1.68
 15 -1 -2 0.02 0.4
 15 1 -2 0.2 0.38
 14 -1 -2 5.46 0.7
 14 1 -2 5.19 0.7
 13 -1 -2 0.42 0.31
 13 -1 -2 0.28 0.15
 13 1 -2 0.08 0.19
 13 1 -2 0.11 0.33
 12 -1 -2 4.97 0.58
 12 -1 -2 4.51 0.31
 12 1 -2 4.56 0.59
 12 1 -2 4.72 0.36
 11 -1 -2 -0.01 0.26
 11 -1 -2 0.18 0.13
 11 1 -2 0.14 0.16
 11 1 -2 0.08 0.26
 10 -1 -2 49.86 1.78
 10 -1 -2 51.75 1.49
 10 1 -2 52.75 1.55
 10 1 -2 49.31 1.81
 9 -1 -2 0.98 0.13
 9 -1 -2 0.5 0.22
 9 1 -2 0.92 0.16
 9 1 -2 1.17 0.26
 8 -1 -2 73.72 1.97
 8 -1 -2 66.81 2.21
 8 1 -2 70.85 2.02
 8 1 -2 71.65 2.24
 7 -1 -2 12 0.38
 7 -1 -2 10.76 0.55
 7 -1 -2 11.13 0.8
 7 1 -2 12.16 0.58
 7 1 -2 9.92 0.75
 7 1 -2 11.71 0.44
 6 -1 -2 161.98 5.17
 6 -1 -2 179.92 4.69
 6 -1 -2 174.59 4.9
 6 1 -2 169.28 5.17
 6 1 -2 183.31 4.76
 6 1 -2 180.88 4.92
 5 -1 -2 9.19 0.64
 5 -1 -2 10.39 0.46
 5 -1 -2 10.02 0.3
 5 1 -2 9.98 0.46
 5 1 -2 10.05 0.39
 5 1 -2 9.64 0.65
 4 -1 -2 139.04 4.11
 4 -1 -2 142.91 3.89
 4 1 -2 147.16 3.88
 4 1 -2 137.7 3.8
 4 1 -2 132.55 4.07
 3 -1 -2 22.9 0.75
 3 -1 -2 21.66 0.9
 3 -1 -2 21.99 0.64
 3 1 -2 22.62 0.71
 -3 1 2 22.84 0.68
 3 1 -2 20.63 0.87
 3 1 -2 22.37 0.66
 2 -1 -2 485.92 13.38
 2 -1 -2 475.91 13.22
 2 -1 -2 406.59 12.99
 2 -1 -2 509.81 13.1
 -2 -1 2 519.51 13.2
 2 1 -2 457.47 13.36
 2 1 -2 523.69 13.12
 2 1 -2 501.38 13.23
 1 -1 -2 0.08 0.04
 1 1 -2 -0.01 0.04
 0 -1 2 240.25 6.79
 0 1 2 258.83 6.74
 0 1 -2 254.78 6.74
 1 -1 2 26.97 0.85
 -1 -1 -2 28.62 0.86
 -1 1 -2 29.61 0.86
 -2 -1 -2 94.55 2.66
 2 -1 2 94.45 2.65
 2 1 2 96.06 2.66
 -2 1 -2 97.75 2.66
 3 -1 2 0.41 0.1
 -3 -1 -2 0.57 0.12
 3 1 2 0.33 0.1
 -3 1 -2 0.27 0.1
 -4 -1 -2 3.22 0.24
 4 -1 2 4.6 0.25
 4 1 2 3.06 0.24
 -4 1 -2 3.7 0.24
 -5 -1 -2 2.97 0.25
 5 -1 2 2.47 0.22
 5 1 2 2.2 0.22
 -5 1 -2 2.15 0.21
 -6 -1 -2 71.59 2.17
 6 -1 2 73.03 2.16
 -6 1 -2 74.58 2.16
 6 1 2 76.9 2.19
 -7 -1 -2 0.69 0.17
 7 -1 2 0.55 0.17
 7 1 2 0.38 0.17
 -7 1 -2 0.98 0.17
 8 -1 2 256.54 7.04
 -8 -1 -2 256.27 7.05
 -8 1 -2 253.16 7.03
 8 1 2 258.47 7.06
 9 -1 2 0.09 0.16
 9 1 2 -0.04 0.17
 10 -1 2 255.91 7.11
 10 1 2 257.79 7.14
 11 -1 2 0.16 0.2
 11 1 2 -0.04 0.2
 12 -1 2 173.96 4.94
 12 1 2 170.7 4.97
 13 -1 2 0.02 0.23
 13 -1 2 0.16 0.39
 13 1 2 0.25 0.24
 14 -1 2 94.23 3.26
 14 -1 2 90.99 2.86
 14 1 2 90.27 2.88
 15 -1 2 0.28 0.29
 15 -1 2 0.47 0.5
 15 1 2 0.45 0.51
 15 1 2 0.37 0.33
 16 -1 2 34.93 1.82
 16 1 2 36.13 1.88
 18 -2 -2 33.33 1.83
 18 2 -2 36.43 1.88
 17 -2 -2 0.06 0.5
 17 2 -2 -0.19 0.51
 16 -2 -2 66.42 2.57
 16 2 -2 67.09 2.65
 15 -2 -2 -0.05 0.37
 15 2 -2 0.13 0.44
 14 -2 -2 100.3 3.32
 14 2 -2 98.06 3.36
 14 2 -2 97.05 3
 13 -2 -2 7.23 0.44
 13 -2 -2 8.41 0.77
 13 2 -2 7.24 0.77
 13 2 -2 6.74 0.51
 12 -2 -2 107.73 3.52
 12 -2 -2 110.36 3.13
 12 2 -2 116.17 3.62
 12 2 -2 114.74 3.27
 11 -2 -2 -0.37 0.22
 11 -2 -2 0.14 0.12
 11 2 -2 0.13 0.18
 11 2 -2 -0.05 0.25
 10 -2 -2 124.57 3.35
 10 -2 -2 117.11 3.66
 10 2 -2 122.99 3.72
 10 2 -2 120.57 3.46
 9 -2 -2 -0.01 0.18
 9 -2 -2 0.31 0.1
 9 2 -2 0.35 0.16
 8 -2 -2 53.83 1.51
 8 -2 -2 51.68 1.74
 8 2 -2 53.99 1.62
 7 -2 -2 1.74 0.41
 7 -2 -2 1.98 0.29
 7 -2 -2 1.87 0.14
 7 2 -2 2.07 0.4
 7 2 -2 2.83 0.26
 6 -2 -2 12.06 0.39
 6 -2 -2 11.31 0.75
 6 -2 -2 11.87 0.56
 6 2 -2 12.82 0.52
 6 2 -2 11.46 0.75
 5 -2 -2 1.31 0.34
 5 -2 -2 1.67 0.11
 5 -2 -2 1.61 0.21
 5 2 -2 1.32 0.29
 5 2 -2 1.54 0.21
 4 -2 -2 2.2 0.14
 4 -2 -2 2.31 0.23
 4 -2 -2 1.55 0.29
 -4 2 2 2.06 0.2
 4 2 -2 2.21 0.22
 4 2 -2 1.89 0.32
 3 -2 -2 0.74 0.14
 3 -2 -2 1.03 0.24
 3 -2 -2 1.02 0.14
 -3 2 2 0.93 0.17
 3 2 -2 0.81 0.12
 3 2 -2 1.05 0.15
 3 2 -2 0.71 0.22
 2 -2 -2 51.63 1.56
 2 -2 -2 52.78 1.66
 -2 -2 2 52.46 1.49
 2 -2 -2 51.91 1.49
 2 2 -2 55.52 1.51
 2 2 -2 48.32 1.57
 2 2 -2 54.71 1.47
 -1 -2 2 0.35 0.07
 1 -2 -2 0.29 0.07
 -1 2 2 0.28 0.08
 1 2 -2 0.31 0.09
 1 2 -2 0.51 0.09
 0 -2 -2 314.78 8.9
 0 -2 2 319.61 9.03
 0 2 2 329.17 8.82
 0 2 -2 339.06 8.98
 -1 -2 -2 42.71 1.28
 1 -2 2 42.55 1.27
 1 2 2 44.45 1.29
 -1 2 -2 44.54 1.28
 2 -2 2 484.34 13.15
 2 2 2 463.45 12.79
 -2 2 -2 485.57 13.07
 3 -2 2 11.4 0.45
 -3 2 -2 11.46 0.45
 3 2 2 11.61 0.47
 4 -2 2 806.94 22.16
 -4 2 -2 830.48 22.14
 4 2 2 806.47 21.75
 5 -2 2 0.16 0.11
 -5 2 -2 0.09 0.11
 5 2 2 0.09 0.13
 6 -2 2 335.71 9.25
 6 2 2 342.42 9.29
 -6 2 -2 346.7 9.26
 7 -2 2 3.07 0.28
 -7 2 -2 2.77 0.27
 7 2 2 2.77 0.3
 -8 -2 -2 204.64 5.77
 8 -2 2 207.42 5.74
 -8 2 -2 210.42 5.74
 8 2 2 206.08 5.79
 9 -2 2 1.82 0.27
 -9 -2 -2 1.75 0.42
 9 2 2 2.13 0.31
 10 -2 2 43.59 1.47
 10 2 2 43.74 1.51
 11 -2 2 0.19 0.21
 11 2 2 0.09 0.22
 12 -2 2 1.79 0.46
 12 -2 2 1.56 0.32
 12 2 2 1.38 0.33
 13 -2 2 0.77 0.41
 13 -2 2 0.58 0.27
 13 2 2 0.27 0.28
 14 -2 2 12.69 0.74
 14 -2 2 12.92 1.09
 14 2 2 11.66 0.77
 15 -2 2 -0.1 0.26
 15 -2 2 0.03 0.43
 15 2 2 0.33 0.32
 16 -2 2 45.38 2.05
 16 2 2 39.05 2.03
 17 -3 -2 -0.15 0.49
 17 3 -2 0.29 0.53
 16 -3 -2 38.63 1.78
 16 3 -2 35.61 1.82
 15 -3 -2 1.1 0.46
 15 3 -2 1.26 0.54
 14 -3 -2 3.1 0.53
 14 3 -2 3.02 0.44
 14 3 -2 2.88 0.6
 13 -3 -2 0.64 0.33
 13 -3 -2 0.34 0.2
 13 3 -2 0.46 0.38
 13 3 -2 0.29 0.28
 12 -3 -2 0.93 0.17
 12 -3 -2 1 0.35
 12 3 -2 0.42 0.27
 12 3 -2 0.8 0.35
 11 -3 -2 -0.15 0.2
 11 -3 -2 0.08 0.12
 11 3 -2 -0.01 0.22
 10 -3 -2 42.82 1.28
 10 -3 -2 40.29 1.56
 10 3 -2 46.08 1.47
 -9 -3 2 1.99 0.25
 9 -3 -2 2.24 0.35
 9 -3 -2 2.22 0.18
 9 3 -2 1.83 0.29
 -8 -3 2 79.46 2.37
 8 -3 -2 76.56 2.47
 8 -3 -2 82.09 2.24
 8 3 -2 81.97 2.4
 7 -3 -2 1.77 0.43
 7 -3 -2 0.87 0.12
 -7 -3 2 1.32 0.21
 7 -3 -2 1.14 0.24
 7 3 -2 1.34 0.24
 6 -3 -2 218.68 5.82
 6 -3 -2 213.57 6
 6 -3 -2 206.44 6.28
 -6 -3 2 211.69 5.95
 6 3 -2 216.69 6.2
 6 3 -2 228.58 5.99
 5 -3 -2 4.75 0.23
 5 -3 -2 4.21 0.48
 5 -3 -2 5.11 0.34
 -5 -3 2 5.07 0.34
 5 3 -2 5.01 0.49
 5 3 -2 5.2 0.38
 -5 3 2 5.29 0.33
 4 -3 -2 164.87 4.8
 4 -3 -2 165.39 4.62
 4 -3 -2 172.74 4.55
 -4 -3 2 157.9 4.6
 4 3 -2 159.23 4.61
 -4 3 2 174.53 4.64
 4 3 -2 165.85 4.73
 3 -3 -2 5.01 0.4
 3 -3 -2 5.02 0.31
 -3 -3 2 4.67 0.3
 3 -3 -2 4.73 0.3
 -3 3 2 5.49 0.39
 3 3 -2 4.99 0.33
 3 3 -2 5.2 0.39
 2 -3 -2 158.51 4.46
 2 -3 -2 164.36 4.37
 -2 -3 2 163.93 4.37
 2 3 -2 163.62 4.37
 2 3 -2 146.55 4.46
 -2 3 2 146.73 4.49
 -2 3 2 163.77 4.37
 -1 -3 2 4.66 0.26
 1 -3 -2 4.12 0.25
 -1 3 2 4.58 0.27
 1 3 -2 4.81 0.33
 1 3 -2 4.47 0.27
 0 -3 -2 93.82 2.67
 0 -3 2 94.11 2.66
 0 3 2 94.85 2.68
 0 3 -2 97.59 2.72
 0 3 -2 96.26 2.68
 -1 -3 -2 0.74 0.14
 1 -3 2 0.76 0.12
 1 3 2 0.71 0.15
 -1 3 -2 0.74 0.13
 2 -3 2 57.14 1.69
 -2 -3 -2 57.58 1.71
 -2 3 -2 58.18 1.7
 2 3 2 59.14 1.72
 -3 -3 -2 4.32 0.28
 3 -3 2 4.1 0.26
 -3 3 -2 4.59 0.28
 3 3 2 4.42 0.3
 -4 -3 -2 26.19 0.9
 4 -3 2 26.55 0.88
 4 3 2 25.51 0.91
 -4 3 -2 26.48 0.89
 5 -3 2 1.72 0.21
 -5 -3 -2 1.93 0.23
 5 3 2 2.31 0.26
 -5 3 -2 2.58 0.25
 -6 -3 -2 50.34 1.62
 6 -3 2 51.99 1.6
 6 3 2 51.93 1.64
 -6 3 -2 52.59 1.6
 -7 -3 -2 0.34 0.16
 7 -3 2 0.6 0.17
 7 3 2 0.33 0.18
 -7 3 -2 0.54 0.17
 8 -3 2 233.75 6.62
 -8 -3 -2 242.96 6.67
 -8 3 -2 243.79 6.63
 8 3 2 240.24 6.69
 9 -3 2 3.01 0.32
 -9 -3 -2 2.84 0.37
 9 3 2 3.56 0.39
 10 -3 2 159.99 4.69
 10 -3 2 156.41 4.47
 10 3 2 154.22 4.54
 11 -3 2 1.82 0.3
 11 -3 2 2.08 0.44
 11 3 2 1.82 0.35
 12 -3 2 176.2 5.08
 12 -3 2 177.33 5.36
 12 3 2 180.16 5.18
 13 -3 2 2.5 0.53
 13 -3 2 2.19 0.37
 13 3 2 2.18 0.41
 14 -3 2 89.28 3.05
 14 -3 2 86.07 2.68
 14 3 2 80.89 2.75
 15 -3 2 0.7 0.47
 15 -3 2 1.14 0.34
 15 3 2 0.81 0.4
 16 -3 2 27.02 1.55
 16 3 2 28.24 1.42
 17 -4 -2 1.4 0.55
 17 4 -2 0.79 0.6
 16 -4 -2 60.19 2.37
 16 4 -2 56.61 2.43
 15 -4 -2 0.07 0.4
 15 4 -2 1.64 0.57
 14 -4 -2 142.02 4.43
 14 4 -2 139.52 4.2
 14 4 -2 140.03 4.52
 13 -4 -2 3.26 0.29
 13 -4 -2 2.99 0.51
 13 4 -2 3.24 0.47
 13 4 -2 3.34 0.56
 12 -4 -2 91.27 3.05
 12 -4 -2 97.17 2.7
 12 4 -2 94.75 2.94
 11 -4 -2 21.7 0.73
 11 -4 -2 20.21 1.01
 11 4 -2 20.69 0.96
 10 -4 -2 82.72 2.67
 10 -4 -2 83.96 2.37
 10 4 -2 84.11 2.6
 -9 -4 2 0.39 0.2
 9 -4 -2 0.3 0.22
 9 -4 -2 0.97 0.15
 9 4 -2 1.02 0.29
 -8 -4 2 55.43 1.75
 8 -4 -2 51.7 1.78
 8 -4 -2 55 1.58
 8 4 -2 53.92 1.78
 7 -4 -2 2.91 0.22
 7 -4 -2 2.66 0.32
 -7 -4 2 3.23 0.34
 7 4 -2 3.19 0.37
 6 -4 -2 23.9 1.13
 6 -4 -2 22.21 0.75
 6 -4 -2 22.22 0.88
 -6 -4 2 24.15 0.91
 6 4 -2 21.93 1.01
 -6 4 2 23.12 0.89
 6 4 -2 23.71 0.93
 5 -4 -2 0.66 0.19
 5 -4 -2 0.69 0.14
 -5 -4 2 1.04 0.22
 5 -4 -2 0.45 0.22
 -5 4 2 0.65 0.19
 5 4 -2 1 0.25
 5 4 -2 0.65 0.23
 -5 4 2 0.47 0.14
 4 -4 -2 7.18 0.53
 4 -4 -2 8.78 0.44
 4 -4 -2 7.52 0.41
 -4 -4 2 7.06 0.44
 4 4 -2 8.13 0.48
 4 4 -2 6.8 0.48
 -4 4 2 8.41 0.44
 -4 4 2 8.63 0.5
 3 -4 -2 0.44 0.16
 -3 -4 2 0.53 0.16
 3 -4 -2 0.3 0.18
 3 -4 -2 0.28 0.14
 -3 4 2 0.5 0.22
 3 4 -2 0.31 0.18
 -3 4 2 0.48 0.19
 3 4 -2 0.22 0.17
 -2 -4 2 71.25 2.11
 2 -4 -2 69.27 2.12
 2 -4 -2 69.3 2.11
 2 4 -2 72.74 2.13
 2 4 -2 72.86 2.11
 2 4 -2 67.7 2.24
 -2 4 2 69.87 2.12
 1 -4 -2 41.99 1.33
 -1 -4 2 42.15 1.32
 1 4 -2 43.12 1.34
 -1 4 2 41.78 1.34
 1 4 -2 41.49 1.44
 0 -4 -2 234.48 6.5
 0 -4 2 239.57 6.5
 0 4 2 238.98 6.52
 0 4 -2 238.77 6.58
 0 4 -2 238.65 6.51
 1 -4 2 32.94 0.95
 -1 -4 -2 32.77 1.08
 1 -4 2 33.7 1.07
 1 4 2 34.29 1.1
 -1 4 -2 32.61 1.08
 2 -4 2 404.85 10.76
 2 -4 2 387.32 10.76
 -2 -4 -2 386.2 10.79
 2 4 2 403.55 10.81
 -2 4 -2 416.15 10.79
 3 -4 2 3.7 0.27
 -3 -4 -2 4.21 0.29
 3 -4 2 3.53 0.23
 3 4 2 4.13 0.32
 -3 4 -2 3.82 0.28
 4 -4 2 522.57 14.44
 4 -4 2 515.74 14.1
 -4 -4 -2 519.96 14.13
 4 4 2 532.86 14.15
 -4 4 -2 531.6 14.11
 5 -4 2 6.52 0.37
 -5 -4 -2 6.1 0.38
 -5 4 -2 6.78 0.38
 5 4 2 6.03 0.41
 6 -4 2 366.15 9.77
 -6 -4 -2 354.17 9.81
 6 -4 2 354.9 9.81
 6 4 2 360.13 9.83
 -6 4 -2 362.72 9.77
 7 -4 2 0.14 0.18
 7 -4 2 0.02 0.14
 -7 -4 -2 0.27 0.16
 -7 4 -2 0.01 0.14
 7 4 2 -0.05 0.18
 -8 -4 -2 125.34 3.68
 8 -4 2 127.13 3.63
 8 -4 2 126.28 3.74
 -8 4 -2 127.96 3.63
 8 4 2 124.85 3.71
 -9 -4 -2 0.44 0.22
 9 -4 2 0.47 0.2
 9 -4 2 0.58 0.26
 9 4 2 0.13 0.23
 10 -4 2 31.73 1.15
 10 -4 2 30.56 1.29
 10 4 2 31.31 1.23
 11 -4 2 1.33 0.36
 11 -4 2 1.62 0.28
 11 4 2 1 0.33
 12 -4 2 0.94 0.36
 12 -4 2 -0.02 0.22
 12 4 2 0.57 0.33
 13 -4 2 -0.05 0.34
 13 -4 2 0.11 0.23
 13 4 2 0.08 0.31
 14 -4 2 10.95 0.69
 14 -4 2 11.77 0.91
 14 4 2 8.3 0.77
 15 -4 2 -0.19 0.41
 15 -4 2 0.17 0.28
 15 4 2 -0.05 0.36
 17 -5 -2 2.9 0.67
 17 5 -2 2 0.67
 16 -5 -2 24.71 1.38
 16 5 -2 22.82 1.47
 15 -5 -2 3.39 0.57
 15 5 -2 2.04 0.6
 15 5 -2 3.65 0.55
 14 -5 -2 7.05 0.75
 14 5 -2 7.38 0.83
 14 5 -2 6.74 0.68
 13 -5 -2 0.71 0.19
 13 -5 -2 0.32 0.31
 13 5 -2 0.91 0.39
 12 -5 -2 3.06 0.28
 12 -5 -2 3.1 0.46
 12 5 -2 3.07 0.49
 11 -5 -2 0.42 0.3
 11 -5 -2 0.51 0.15
 11 5 -2 0.09 0.31
 10 -5 -2 25.41 0.86
 10 -5 -2 24.9 1.08
 10 5 -2 24.49 1.1
 9 -5 -2 -0.12 0.12
 9 -5 -2 -0.13 0.18
 -9 -5 2 -0.17 0.17
 9 5 -2 0.53 0.3
 8 -5 -2 72.4 2.32
 -8 -5 2 72.59 2.32
 8 -5 -2 72.25 2.13
 -8 5 2 75 2.36
 8 5 -2 74.07 2.37
 -8 5 2 74.45 2.14
 -7 -5 2 1.95 0.3
 7 -5 -2 1.9 0.3
 7 -5 -2 2.2 0.22
 -7 5 2 2.59 0.35
 -7 5 2 2.73 0.25
 7 5 -2 2.76 0.41
 -6 -5 2 186.39 5.28
 6 -5 -2 186.12 5.12
 6 -5 -2 186.89 5.5
 6 -5 -2 184.06 5.23
 6 5 -2 181.06 5.3
 -6 5 2 183.92 5.12
 -6 5 2 187.98 5.29
 -5 -5 2 21.79 0.91
 5 -5 -2 22.15 0.86
 5 -5 -2 21.91 1.02
 5 -5 -2 22.17 0.83
 5 5 -2 21.9 0.9
 -5 5 2 22.76 0.84
 5 5 -2 22.63 0.96
 -5 5 2 22.56 0.95
 4 -5 -2 238.85 6.57
 -4 -5 2 233.49 6.63
 4 -5 -2 249.27 6.73
 4 -5 -2 231.79 6.59
 -4 5 2 224.46 6.58
 -4 5 2 245.23 6.75
 4 5 -2 237.17 6.66
 4 5 -2 243.1 6.57
 3 -5 -2 1.67 0.27
 -3 -5 2 1.34 0.24
 3 -5 -2 0.85 0.21
 -3 5 2 1.18 0.26
 -3 5 2 1.23 0.3
 3 5 -2 1.35 0.28
 3 5 -2 1.67 0.22
 2 -5 -2 276.38 7.61
 -2 -5 2 269.18 7.65
 2 -5 -2 279.67 7.68
 -2 5 2 276.68 7.68
 2 5 -2 276.26 7.67
 2 5 -2 286.45 7.55
 2 5 -2 278.59 7.85
 -1 -5 2 4.25 0.33
 1 -5 -2 4.48 0.36
 1 -5 -2 4.72 0.32
 -1 5 2 4.66 0.4
 1 5 -2 3.8 0.45
 1 5 -2 4.55 0.4
 0 -5 2 119.8 3.4
 0 -5 -2 119.28 3.4
 0 5 -2 117.32 3.5
 0 5 -2 119.99 3.42
 0 5 2 115.71 3.41
 1 -5 2 7.59 0.28
 -1 -5 -2 7.13 0.42
 1 -5 2 8.13 0.43
 -1 5 -2 8.21 0.48
 -1 5 -2 7.77 0.44
 1 5 2 7.04 0.45
 -2 -5 -2 66.28 2
 2 -5 2 65.63 1.97
 2 -5 2 64.53 1.85
 -2 5 -2 66.66 1.99
 -2 5 -2 66.04 2.07
 2 5 2 63.46 2.01
 3 -5 2 3.34 0.3
 3 -5 2 3.49 0.23
 -3 -5 -2 2.63 0.28
 3 5 2 2.81 0.3
 -3 5 -2 3.59 0.31
 -4 -5 -2 0.06 0.14
 4 -5 2 1.41 0.21
 4 -5 2 0.03 0.1
 -4 5 -2 0.55 0.18
 4 5 2 0.18 0.18
 -5 -5 -2 6.78 0.44
 5 -5 2 6.25 0.38
 5 -5 2 7.18 0.42
 5 5 2 6.7 0.47
 -5 5 -2 6.66 0.42
 6 -5 2 64.55 2.06
 6 -5 2 68.51 2.07
 -6 -5 -2 69.66 2.13
 -6 5 -2 66.9 2.07
 6 5 2 68.27 2.14
 -7 -5 -2 3.05 0.35
 7 -5 2 4.32 0.37
 7 -5 2 3.55 0.38
 7 5 2 3.29 0.38
 -7 5 -2 3.01 0.33
 -8 -5 -2 93.18 2.76
 8 -5 2 84.89 2.74
 8 -5 2 89.25 2.67
 -8 5 -2 87.25 2.67
 8 5 2 92.57 2.78
 9 -5 2 1.17 0.25
 -9 -5 -2 1.24 0.31
 9 -5 2 1.27 0.3
 9 5 2 1.24 0.32
 10 -5 2 159.02 4.73
 10 -5 2 160.35 4.58
 10 5 2 160.02 4.71
 11 -5 2 0.89 0.33
 11 -5 2 0.35 0.23
 11 5 2 0.84 0.33
 12 -5 2 144.48 4.42
 12 -5 2 145.09 4.19
 12 5 2 140.97 4.35
 13 -5 2 0.53 0.37
 13 -5 2 0.55 0.28
 13 5 2 1.16 0.41
 14 -5 2 58.65 2.3
 14 -5 2 61.94 2.04
 14 5 2 59.78 2.21
 15 -5 2 -0.01 0.39
 15 -5 2 0.12 0.35
 15 5 2 0.13 0.4
 17 -6 -2 0.02 0.47
 17 6 -2 0.15 0.54
 16 -6 -2 37.97 1.79
 16 6 -2 39.87 1.94
 15 -6 -2 3.68 0.62
 15 6 -2 2.77 0.56
 15 6 -2 2.84 0.65
 14 -6 -2 84.02 2.85
 14 6 -2 81.31 2.97
 14 6 -2 78.57 2.75
 13 -6 -2 4.62 0.36
 13 -6 -2 4.89 0.61
 13 6 -2 5.18 0.64
 12 -6 -2 93.62 3.08
 12 -6 -2 93.73 2.74
 12 6 -2 97.37 3.1
 11 -6 -2 0.88 0.2
 11 -6 -2 0.57 0.3
 -11 6 2 0.95 0.32
 11 6 -2 0.66 0.37
 10 -6 -2 75.99 2.26
 10 -6 -2 78.02 2.52
 10 6 -2 76.79 2.56
 -10 6 2 76.4 2.55
 -9 -6 2 1.99 0.38
 9 -6 -2 2.43 0.4
 9 -6 -2 2.3 0.25
 9 6 -2 1.6 0.41
 -9 6 2 2.71 0.41
 8 -6 -2 34.82 1.15
 8 -6 -2 34.16 1.3
 -8 -6 2 33.76 1.33
 8 6 -2 34.8 1.41
 -8 6 2 34.98 1.36
 7 -6 -2 -0.04 0.17
 7 -6 -2 0.03 0.14
 -7 -6 2 -0.04 0.19
 7 6 -2 0.11 0.28
 -7 6 2 0.14 0.15
 -7 6 2 -0.13 0.19
 -6 -6 2 14.14 0.73
 6 -6 -2 14.77 0.65
 6 -6 -2 13.21 0.67
 -6 6 2 13.35 0.76
 -6 6 2 14.33 0.65
 6 6 -2 14.63 0.81
 -5 -6 2 2.68 0.36
 5 -6 -2 3 0.34
 5 -6 -2 3.2 0.35
 5 -6 -2 2.69 0.41
 -5 6 2 2.85 0.35
 -5 6 2 3.21 0.42
 5 6 -2 2.88 0.4
 4 -6 -2 10.7 0.54
 4 -6 -2 9.13 0.58
 4 -6 -2 11.14 0.63
 -4 -6 2 10.5 0.6
 4 6 -2 10.44 0.66
 -4 6 2 10.7 0.72
 4 6 -2 10.54 0.51
 -4 6 2 10.55 0.62
 -3 -6 2 1.15 0.25
 3 -6 -2 1.82 0.3
 3 -6 -2 1.96 0.28
 3 6 -2 2.22 0.22
 -3 6 2 1.88 0.32
 3 6 -2 1.89 0.32
 -3 6 2 1.12 0.32
 2 -6 -2 46.61 1.62
 2 -6 -2 47.68 1.5
 -2 -6 2 44.86 1.59
 2 6 -2 49.38 1.41
 2 6 -2 45.56 1.61
 -2 6 2 44.45 1.62
 2 6 -2 51.61 1.84
 1 -6 -2 10 0.56
 -1 -6 2 9.79 0.55
 1 -6 -2 9.05 0.43
 1 6 -2 8.97 0.58
 1 6 -2 8.48 0.67
 -1 6 2 9.05 0.59
 0 -6 2 117.78 3.45
 0 -6 -2 120.29 3.47
 0 6 2 115.79 3.48
 0 6 -2 118.02 3.47
 0 6 -2 118.37 3.59
 1 -6 2 26.48 0.99
 -1 -6 -2 26.3 1
 -1 6 -2 26.79 1.01
 1 6 2 25.97 1.03
 -1 6 -2 25.43 1.08
 -2 -6 -2 438.87 11.97
 2 -6 2 435.01 11.76
 2 -6 2 444.01 11.94
 -2 6 -2 447.41 11.96
 2 6 2 433.91 11.98
 -2 6 -2 438.93 12.05
 -3 -6 -2 9.84 0.54
 3 -6 2 9.95 0.52
 3 -6 2 9.2 0.41
 -3 6 -2 10 0.59
 3 6 2 9.24 0.57
 -3 6 -2 10.43 0.54
 4 -6 2 217.41 5.94
 4 -6 2 218.89 6.03
 -4 -6 -2 215.23 6.07
 4 6 2 210.64 6.09
 -4 6 -2 219.09 6.04
 -5 -6 -2 13.75 0.67
 5 -6 2 12.46 0.61
 5 -6 2 12.24 0.56
 5 6 2 13.5 0.7
 -5 6 -2 11.98 0.61
 6 -6 2 215.79 5.93
 -6 -6 -2 210.99 5.99
 6 -6 2 210.87 5.9
 -6 6 -2 213.59 5.93
 6 6 2 206.98 6.01
 7 -6 2 2.01 0.29
 7 -6 2 1.81 0.28
 -7 -6 -2 1.6 0.31
 7 6 2 2.14 0.38
 -7 6 -2 1.97 0.29
 -8 -6 -2 81.89 2.57
 8 -6 2 81.41 2.53
 8 -6 2 80.88 2.48
 8 6 2 79.14 2.6
 9 -6 2 4.95 0.5
 9 -6 2 4.31 0.41
 -9 -6 -2 3.56 0.59
 9 6 2 3.72 0.49
 10 -6 2 23.37 0.98
 10 -6 2 23.13 1.07
 10 6 2 25.11 1.16
 11 -6 2 1.37 0.37
 11 -6 2 1.32 0.3
 11 6 2 1.37 0.4
 12 -6 2 -0.14 0.23
 12 -6 2 0 0.29
 12 6 2 0.15 0.36
 13 -6 2 1.5 0.34
 13 -6 2 2.19 0.47
 13 6 2 1.54 0.48
 14 -6 2 7.33 0.81
 14 -6 2 8.04 0.63
 14 6 2 9.44 0.84
 15 -6 2 0.4 0.44
 15 6 2 0.3 0.48
 16 -7 -2 19.12 1.24
 16 7 -2 16.53 1.29
 15 -7 -2 2.78 0.59
 15 7 -2 3.04 0.58
 15 7 -2 2.26 0.59
 -15 7 2 3.58 0.77
 14 -7 -2 5.83 0.73
 -14 7 2 5.27 0.71
 14 7 -2 4.59 0.68
 13 -7 -2 1.36 0.42
 13 -7 -2 0.94 0.23
 -13 7 2 1.15 0.43
 13 7 -2 0.84 0.47
 12 -7 -2 1.42 0.4
 12 -7 -2 0.99 0.23
 -12 7 2 0.77 0.38
 12 7 -2 1.5 0.5
 11 -7 -2 0.62 0.21
 11 -7 -2 0.67 0.33
 -11 7 2 0.18 0.31
 11 7 -2 0.44 0.4
 10 -7 -2 10.41 0.72
 10 -7 -2 11.78 0.57
 -10 7 2 11.86 0.8
 10 7 -2 9.74 0.85
 -9 -7 2 1.34 0.46
 9 -7 -2 1.44 0.24
 9 -7 -2 1.1 0.32
 9 7 -2 1.21 0.43
 -9 7 2 0.8 0.33
 8 -7 -2 96.78 2.95
 8 -7 -2 95.93 2.81
 -8 -7 2 95.89 3.02
 8 7 -2 92.72 3.06
 -8 7 2 92.12 3.04
 7 -7 -2 0.74 0.25
 -7 -7 2 0.69 0.28
 7 -7 -2 0.53 0.22
 -7 7 2 0.74 0.24
 7 7 -2 0.84 0.36
 -7 7 2 0.72 0.3
 6 -7 -2 89.65 2.69
 6 -7 -2 86.96 2.68
 -6 -7 2 86.24 2.77
 -6 7 2 89.89 2.69
 6 7 -2 86.44 2.82
 -6 7 2 85.27 2.86
 5 -7 -2 2.28 0.31
 5 -7 -2 2.25 0.35
 -5 -7 2 2.7 0.38
 -5 7 2 2.49 0.42
 -5 7 2 2.55 0.37
 5 7 -2 2.19 0.4
 4 -7 -2 161.16 4.67
 -4 -7 2 165.32 4.74
 4 -7 -2 160.83 4.71
 4 7 -2 171.43 4.8
 -4 7 2 152.1 4.87
 -4 7 2 158.63 4.71
 3 -7 -2 38.29 1.3
 -3 -7 2 37.9 1.4
 3 -7 -2 37.42 1.4
 3 7 -2 36.84 1.44
 -3 7 2 38.16 1.43
 3 7 -2 36.26 1.12
 -3 7 2 37.46 1.59
 -2 -7 2 108.07 3.38
 2 -7 -2 111.08 3.39
 2 -7 -2 111.65 3.2
 -2 7 2 112.34 3.41
 2 7 -2 115.46 3.06
 2 7 -2 110.77 3.42
 1 -7 -2 0.55 0.24
 1 -7 -2 0.77 0.16
 -1 -7 2 0.65 0.23
 -1 7 2 0.86 0.31
 1 7 -2 0.93 0.37
 1 7 -2 0.44 0.27
 0 -7 -2 42.4 1.53
 0 -7 2 43.37 1.52
 0 -7 -2 43.02 1.31
 0 7 -2 41.81 1.67
 0 7 2 43.66 1.57
 0 7 -2 45.7 1.57
 1 -7 2 -0.03 0.18
 -1 -7 -2 0 0.16
 -1 7 -2 0.11 0.22
 -1 7 -2 0.06 0.22
 1 7 2 0.04 0.22
 2 -7 2 16.61 0.6
 2 -7 2 17.41 0.79
 -2 -7 -2 17.52 0.81
 -2 7 -2 17.15 0.81
 -2 7 -2 18.47 0.89
 2 7 2 18.2 0.86
 3 -7 2 0.79 0.24
 -3 -7 -2 1.45 0.28
 3 -7 2 1.25 0.18
 -3 7 -2 1.08 0.3
 -3 7 -2 1.54 0.3
 3 7 2 0.98 0.32
 4 -7 2 5.94 0.44
 -4 -7 -2 4.52 0.44
 4 -7 2 5.49 0.35
 -4 7 -2 5.76 0.58
 -4 7 -2 5.3 0.45
 4 7 2 4.29 0.45
 5 -7 2 7.45 0.5
 -5 -7 -2 8.03 0.56
 5 -7 2 8.18 0.45
 -5 7 -2 8.28 0.65
 -5 7 -2 7.4 0.52
 5 7 2 8.3 0.63
 -6 -7 -2 37.72 1.45
 6 -7 2 40.93 1.42
 6 -7 2 40.51 1.37
 -6 7 -2 40.73 1.43
 6 7 2 41.68 1.54
 7 -7 2 6.89 0.49
 7 -7 2 6.33 0.47
 -7 -7 -2 6.01 0.53
 7 7 2 5.44 0.56
 -7 7 -2 6.78 0.51
 8 -7 2 79.76 2.49
 -8 -7 -2 81.86 2.59
 8 -7 2 77.26 2.48
 8 7 2 79.29 2.63
 9 -7 2 0.19 0.21
 9 -7 2 0.23 0.22
 9 7 2 -0.17 0.29
 10 -7 2 92.63 2.95
 10 -7 2 92.53 2.86
 10 7 2 93.44 3.06
 11 -7 2 0.21 0.25
 11 -7 2 0.08 0.28
 11 7 2 0.09 0.36
 12 -7 2 81.22 2.61
 12 -7 2 83.3 2.79
 12 7 2 82.93 2.85
 13 -7 2 -0.15 0.33
 13 -7 2 0.52 0.29
 13 7 2 0.15 0.42
 14 -7 2 45.22 1.9
 14 -7 2 45.6 1.68
 14 7 2 47.15 1.97
 15 -7 2 -0.36 0.4
 15 7 2 -0.33 0.49
 16 -8 -2 23.69 1.38
 16 8 -2 20.97 1.43
 16 8 -2 22.66 1.45
 15 -8 -2 2.92 0.6
 -15 8 2 3.97 0.86
 15 8 -2 3.03 0.67
 15 8 -2 3.11 0.62
 14 -8 -2 48.14 1.97
 14 8 -2 44.93 1.95
 -14 8 2 49.93 2.07
 13 -8 -2 4.98 0.43
 13 -8 -2 5.23 0.66
 -13 8 2 5.87 0.74
 13 8 -2 5.23 0.73
 12 -8 -2 58.69 2.18
 12 -8 -2 59.24 1.89
 -12 8 2 59.05 2.27
 12 8 -2 59.32 2.26
 11 -8 -2 4.42 0.54
 11 -8 -2 3.85 0.39
 11 8 -2 3.82 0.61
 -11 8 2 3.28 0.56
 10 -8 -2 60.87 2.17
 10 -8 -2 60.61 1.98
 10 8 -2 63.89 2.32
 -10 8 2 63.93 2.31
 9 -8 -2 11.55 0.64
 9 -8 -2 12.11 0.75
 -9 8 2 11.96 0.85
 9 8 -2 11.67 0.91
 8 -8 -2 53.57 1.83
 -8 -8 2 57.55 2.01
 8 -8 -2 56.88 1.92
 -8 8 2 51.25 2.05
 8 8 -2 57.58 2.08
 -7 -8 2 3.15 0.44
 7 -8 -2 3.78 0.42
 7 -8 -2 2.66 0.38
 -7 8 2 2.36 0.37
 -7 8 2 3.01 0.52
 7 8 -2 3.48 0.53
 6 -8 -2 8.25 0.55
 -6 -8 2 7.74 0.67
 6 -8 -2 8.75 0.61
 -6 8 2 10.38 0.9
 6 8 -2 7.38 0.69
 -6 8 2 8.6 0.63
 -5 -8 2 0.39 0.24
 5 -8 -2 0.36 0.26
 -5 8 2 0.51 0.36
 5 8 -2 0.38 0.29
 -5 8 2 0.37 0.28
 4 -8 -2 4.79 0.51
 -4 -8 2 4.57 0.52
 -4 8 2 3.77 0.47
 -4 8 2 4.43 0.58
 4 8 -2 5.13 0.59
 -3 -8 2 12.65 0.74
 3 -8 -2 14.38 0.77
 3 -8 -2 12.64 0.63
 -3 8 2 14.88 0.83
 -3 8 2 14.22 0.98
 3 8 -2 13.55 0.82
 -2 -8 2 34.19 1.34
 2 -8 -2 32.97 1.32
 2 -8 -2 33.78 1.11
 2 8 -2 32.58 1.37
 -2 8 2 32.83 1.35
 -1 -8 2 18.26 0.91
 1 -8 -2 18.85 0.65
 1 -8 -2 17.77 0.9
 -1 8 2 18.17 0.96
 1 8 -2 18.25 0.97
 1 8 -2 18.63 1.11
 0 -8 -2 133.84 4.05
 0 -8 -2 136.02 3.68
 0 -8 2 134.94 4.03
 0 8 -2 128.76 4.2
 0 8 -2 135.21 4.06
 0 8 2 138.2 4.1
 1 -8 2 7.49 0.58
 -1 -8 -2 7.22 0.61
 1 8 2 8.58 0.71
 -1 8 -2 8.1 0.74
 -1 8 -2 7.65 0.64
 2 -8 2 138.13 4.01
 -2 -8 -2 134.58 4.02
 -2 8 -2 130.57 4.13
 2 8 2 131.77 4.05
 -2 8 -2 135.91 4.02
 -3 -8 -2 22.29 1.01
 3 -8 2 23.48 0.99
 3 -8 2 21.91 0.79
 -3 8 -2 22.19 0.99
 -3 8 -2 23.36 1.12
 3 8 2 23.07 1.08
 -4 -8 -2 168.27 4.95
 4 -8 2 168.74 4.72
 4 -8 2 170.38 4.91
 -4 8 -2 173.7 4.93
 -4 8 -2 168.89 5.07
 4 8 2 165.95 4.99
 -5 -8 -2 1.51 0.33
 5 -8 2 1.52 0.25
 5 -8 2 1.62 0.32
 -5 8 -2 1.91 0.42
 5 8 2 1.94 0.42
 -5 8 -2 1.93 0.36
 6 -8 2 159.19 4.68
 6 -8 2 161.05 4.58
 -6 -8 -2 156.99 4.75
 6 8 2 162.65 4.82
 -6 8 -2 159.7 4.68
 -6 8 -2 166.34 4.91
 -7 -8 -2 5.83 0.59
 7 -8 2 6.99 0.55
 7 -8 2 7.3 0.5
 -7 8 -2 8.08 0.78
 7 8 2 6.5 0.65
 -7 8 -2 6.37 0.55
 -8 -8 -2 48.72 1.8
 8 -8 2 49.46 1.69
 8 -8 2 47.02 1.66
 8 8 2 46.33 1.84
 9 -8 2 2.67 0.4
 9 -8 2 1.81 0.35
 9 8 2 2.61 0.53
 10 -8 2 17.06 0.85
 10 -8 2 14.73 0.84
 10 8 2 15.36 1.04
 11 -8 2 1.38 0.34
 11 -8 2 0.89 0.36
 11 8 2 1.91 0.54
 12 -8 2 -0.37 0.23
 12 -8 2 0.16 0.32
 12 8 2 0 0.44
 13 -8 2 1.16 0.41
 13 -8 2 0.79 0.32
 13 8 2 0.08 0.5
 14 -8 2 2.19 0.43
 14 -8 2 2.14 0.53
 14 8 2 2.65 0.67
 16 -9 -2 10.32 1.01
 16 9 -2 7.06 0.95
 15 -9 -2 4.07 0.7
 15 9 -2 3.37 0.71
 -15 9 2 4.01 1.19
 15 9 -2 4.56 0.78
 14 -9 -2 0.47 0.42
 14 9 -2 1.1 0.57
 -14 9 2 2 0.6
 13 -9 -2 0.73 0.4
 13 -9 -2 -0.19 0.22
 13 9 -2 0.55 0.48
 -13 9 2 -0.06 0.41
 12 -9 -2 0.28 0.33
 12 -9 -2 0.5 0.26
 -12 9 2 -0.02 0.38
 12 9 -2 0.47 0.46
 11 -9 -2 1.91 0.44
 11 -9 -2 1.07 0.28
 -11 9 2 1.28 0.48
 11 9 -2 2.11 0.58
 10 -9 -2 23.95 1.03
 10 -9 -2 25.17 1.17
 10 9 -2 25.03 1.31
 -10 9 2 24.44 1.31
 9 -9 -2 2.93 0.4
 9 -9 -2 2.4 0.44
 9 9 -2 3.13 0.58
 -9 9 2 1.77 0.47
 8 -9 -2 39.26 1.48
 8 -9 -2 39.08 1.5
 -8 -9 2 40.03 1.6
 8 9 -2 42.33 1.71
 -8 9 2 34.47 1.66
 -7 -9 2 2.18 0.42
 7 -9 -2 1.34 0.34
 7 -9 -2 2.07 0.38
 7 9 -2 1.4 0.48
 -7 9 2 1.31 0.46
 -7 9 2 1.28 0.34
 6 -9 -2 84.75 2.81
 -6 -9 2 88.19 2.86
 -6 9 2 86.57 3.03
 6 9 -2 91.14 2.95
 -6 9 2 82.62 2.8
 -5 -9 2 4.23 0.51
 5 -9 -2 3.17 0.46
 -5 9 2 3.35 0.58
 5 9 -2 3.67 0.58
 -5 9 2 3.94 0.53
 4 -9 -2 104.14 3.31
 -4 -9 2 101.61 3.28
 4 9 -2 106.39 3.37
 -4 9 2 100.41 3.5
 -4 9 2 107.28 3.34
 3 -9 -2 8.26 0.71
 -3 -9 2 7.43 0.67
 -3 9 2 8.38 0.74
 3 9 -2 8.29 0.77
 2 -9 -2 111.37 3.45
 -2 -9 2 106.37 3.45
 -2 9 2 112.49 3.5
 2 9 -2 110.11 3.5
 1 -9 -2 3.33 0.49
 -1 -9 2 3.23 0.45
 1 9 -2 2.94 0.56
 1 9 -2 2.82 0.47
 -1 9 2 3 0.5
 0 -9 -2 48.88 1.78
 0 -9 2 47.02 1.75
 0 9 -2 47.89 1.81
 0 9 2 45.82 1.81
 0 9 -2 45.5 1.95
 1 -9 2 -0.21 0.22
 -1 -9 -2 0.48 0.26
 1 9 2 0.28 0.31
 -1 9 -2 0.26 0.34
 -1 9 -2 0.17 0.3
 -2 -9 -2 8.89 0.67
 2 -9 2 9.13 0.64
 -2 9 -2 9.76 0.8
 2 9 2 9.62 0.8
 -2 9 -2 8.25 0.66
 3 -9 2 7.55 0.66
 -3 -9 -2 7.08 0.66
 3 9 2 8.33 0.77
 -3 9 -2 5.74 0.65
 -3 9 -2 7.11 0.66
 4 -9 2 1.68 0.25
 -4 -9 -2 2.18 0.41
 4 -9 2 1.49 0.36
 -4 9 -2 1.85 0.45
 -4 9 -2 1.56 0.39
 4 9 2 1.81 0.46
 5 -9 2 1.18 0.24
 -5 -9 -2 1.57 0.35
 5 -9 2 1.45 0.34
 5 9 2 1.16 0.39
 -5 9 -2 1.23 0.34
 -5 9 -2 1.16 0.43
 6 -9 2 13.59 0.81
 6 -9 2 15.09 0.7
 -6 -9 -2 14.41 0.86
 -6 9 -2 13.07 0.91
 6 9 2 14.23 0.94
 -6 9 -2 13.44 0.8
 7 -9 2 16.22 0.85
 -7 -9 -2 14.94 0.9
 7 -9 2 17.1 0.79
 -7 9 -2 15.12 1.02
 7 9 2 15.08 0.98
 -7 9 -2 14.86 0.85
 8 -9 2 60.76 2.09
 -8 -9 -2 62.8 2.22
 8 -9 2 59.23 2.02
 -8 9 -2 62.41 2.35
 8 9 2 58.62 2.25
 9 -9 2 0.57 0.29
 9 -9 2 0.35 0.3
 9 9 2 0.52 0.45
 -9 9 -2 0.25 0.4
 10 -9 2 46.4 1.73
 10 -9 2 46.64 1.73
 -10 9 -2 46.99 2.01
 10 9 2 47.14 1.97
 11 -9 2 0.15 0.28
 11 -9 2 0.43 0.32
 11 9 2 0.59 0.5
 -11 9 -2 -0.27 0.4
 12 -9 2 38.22 1.54
 12 -9 2 38.29 1.72
 -12 9 -2 43.44 1.94
 12 9 2 40.07 1.86
 13 -9 2 0.61 0.34
 13 9 2 1.12 0.59
 -13 9 -2 0.99 0.53
 14 -9 2 24.68 1.17
 -14 9 -2 24.96 1.54
 14 9 2 24.48 1.53
 15 -10 -2 1.61 0.54
 15 10 -2 1.62 0.63
 15 10 -2 0.61 0.56
 14 -10 -2 33.22 1.58
 14 10 -2 32.72 1.68
 -14 10 2 30.81 1.71
 13 -10 -2 6.74 0.78
 13 -10 -2 5.22 0.53
 -13 10 2 6.75 0.85
 13 10 -2 5.84 0.83
 12 -10 -2 41.7 1.56
 12 -10 -2 42.61 1.77
 -12 10 2 44.32 1.99
 12 10 -2 42.53 1.92
 11 -10 -2 6.53 0.58
 11 -10 -2 7.06 0.71
 11 10 -2 6.65 0.82
 -11 10 2 7.3 0.86
 10 -10 -2 60.31 2.13
 10 -10 -2 66.41 2.28
 10 10 -2 63.66 2.41
 -10 10 2 61.97 2.49
 9 -10 -2 1.58 0.37
 9 -10 -2 2.26 0.44
 9 10 -2 2.26 0.56
 -9 10 2 2.99 0.62
 -8 -10 2 16.29 0.96
 8 -10 -2 14.93 0.87
 8 -10 -2 14.67 0.85
 -8 10 2 14.64 1.09
 8 10 -2 14.62 1.04
 7 -10 -2 1.04 0.34
 -7 -10 2 0.6 0.35
 -7 10 2 0.8 0.44
 7 10 -2 0.59 0.45
 6 -10 -2 4.49 0.57
 -6 -10 2 5.84 0.67
 -6 10 2 4.25 0.71
 6 10 -2 4.54 0.66
 -6 10 2 4.32 0.57
 5 -10 -2 4.05 0.56
 -5 -10 2 4.04 0.57
 -5 10 2 5.23 0.75
 -5 10 2 3.53 0.56
 5 10 -2 5.09 0.68
 -4 -10 2 2.22 0.44
 4 -10 -2 1.26 0.36
 4 10 -2 0.81 0.45
 -4 10 2 1.44 0.54
 -4 10 2 1.44 0.42
 -3 -10 2 3.25 0.49
 3 -10 -2 2.24 0.42
 3 10 -2 3.73 0.59
 -3 10 2 2.14 0.47
 2 -10 -2 35.27 1.48
 -2 -10 2 37.51 1.54
 -2 10 2 34.42 1.53
 2 10 -2 38.84 1.63
 -1 -10 2 13.15 0.83
 1 -10 -2 14.75 0.87
 -1 10 2 13.56 0.94
 1 10 -2 13.76 0.92
 0 -10 2 73.28 2.49
 0 -10 -2 70.1 2.46
 0 10 2 71.21 2.52
 0 10 -2 71.41 2.7
 0 10 -2 73.69 2.54
 1 -10 2 6.06 0.64
 -1 -10 -2 6.98 0.68
 -1 10 -2 5.99 0.65
 1 10 2 6.79 0.71
 -1 10 -2 6.41 0.78
 2 -10 2 85.37 2.81
 -2 -10 -2 82.98 2.82
 -2 10 -2 82.62 2.83
 2 10 2 84.38 2.89
 -2 10 -2 84.64 3.01
 3 -10 2 13.25 0.81
 -3 -10 -2 13.01 0.83
 -3 10 -2 12.63 0.84
 -3 10 -2 15.28 1
 3 10 2 12.36 0.89
 4 -10 2 70.12 2.45
 -4 -10 -2 73.54 2.51
 -4 10 -2 73.96 2.5
 4 10 2 71.85 2.55
 -4 10 -2 69.5 2.63
 -5 -10 -2 1.92 0.43
 5 -10 2 1.47 0.36
 5 10 2 1.36 0.47
 -5 10 -2 1.18 0.44
 -5 10 -2 1.78 0.42
 -6 -10 -2 38.06 1.62
 6 -10 2 40.47 1.58
 -6 10 -2 38.59 1.58
 -6 10 -2 41.03 1.79
 6 10 2 39.41 1.69
 -7 -10 -2 -0.17 0.29
 7 -10 2 0.03 0.26
 7 10 2 -0.33 0.38
 -7 10 -2 -0.15 0.35
 8 -10 2 40.82 1.63
 -8 -10 -2 41.89 1.74
 -8 10 -2 40.62 1.86
 8 10 2 42.41 1.83
 9 -10 2 0.02 0.3
 9 10 2 -0.67 0.42
 -9 10 -2 0.14 0.39
 10 -10 2 7.23 0.69
 -10 10 -2 6.22 0.87
 10 10 2 7.89 0.93
 11 -10 2 1.15 0.39
 11 10 2 0.65 0.55
 -11 10 -2 1.45 0.57
 12 -10 2 -0.03 0.33
 -12 10 -2 0.22 0.47
 12 10 2 0.73 0.62
 13 -10 2 0.78 0.38
 13 10 2 0.57 0.61
 -13 10 -2 0.76 0.52
 14 -11 -2 3.34 0.7
 14 11 -2 2.61 0.71
 -14 11 2 3.99 0.82
 13 -11 -2 1.47 0.38
 13 -11 -2 1 0.48
 -13 11 2 1.77 0.64
 13 11 -2 1.55 0.62
 12 -11 -2 0.27 0.38
 12 -11 -2 0.02 0.29
 -12 11 2 0.46 0.49
 12 11 -2 0.09 0.52
 11 -11 -2 0.09 0.35
 11 -11 -2 -0.35 0.29
 -11 11 2 0.17 0.47
 11 11 -2 0.12 0.53
 10 -11 -2 9.62 0.74
 10 -11 -2 7.97 0.76
 10 11 -2 9.03 0.95
 -10 11 2 7.89 0.92
 9 -11 -2 0.57 0.34
 9 -11 -2 0.29 0.33
 -9 11 2 0.41 0.46
 9 11 -2 1.25 0.54
 8 -11 -2 21.52 1.12
 -8 -11 2 20.94 1.15
 8 11 -2 20.35 1.29
 -8 11 2 19.51 1.33
 -7 -11 2 0.04 0.29
 7 -11 -2 0.44 0.34
 -7 11 2 0.58 0.49
 7 11 -2 0.43 0.46
 6 -11 -2 57.45 2.22
 -6 -11 2 60.19 2.23
 6 11 -2 62.82 2.35
 -6 11 2 61.56 2.27
 -6 11 2 58.91 2.47
 5 -11 -2 -0.07 0.29
 -5 -11 2 0.32 0.33
 -5 11 2 0.29 0.39
 -5 11 2 0.27 0.47
 5 11 -2 0.25 0.44
 4 -11 -2 37.62 1.57
 -4 -11 2 34.79 1.54
 -4 11 2 34.01 1.58
 4 11 -2 35.87 1.65
 3 -11 -2 2.16 0.45
 -3 -11 2 2.27 0.47
 -3 11 2 1.87 0.5
 3 11 -2 2.2 0.54
 -2 -11 2 80.26 2.72
 2 -11 -2 75.68 2.66
 2 11 -2 76.62 2.75
 -2 11 2 77.5 2.74
 1 -11 -2 0.28 0.3
 -1 -11 2 -0.11 0.25
 1 11 -2 0.27 0.39
 -1 11 2 0.48 0.41
 0 -11 2 19.32 1.07
 0 -11 -2 16.92 0.98
 0 11 2 19.75 1.1
 0 11 -2 18.13 1.13
 0 11 -2 18.01 1.22
 1 -11 2 0.51 0.35
 -1 -11 -2 1.95 0.45
 1 11 2 1.17 0.49
 -1 11 -2 0.91 0.49
 -1 11 -2 0.51 0.44
 2 -11 2 3.78 0.58
 -2 -11 -2 5.07 0.64
 -2 11 -2 3.3 0.66
 -2 11 -2 4.62 0.68
 2 11 2 4.53 0.71
 -3 -11 -2 1.72 0.41
 3 -11 2 1.45 0.4
 3 11 2 2.46 0.55
 -3 11 -2 1.76 0.48
 -3 11 -2 0.78 0.51
 -4 -11 -2 1.9 0.44
 4 -11 2 1.6 0.39
 4 11 2 2.75 0.59
 -4 11 -2 2.09 0.58
 -4 11 -2 1.57 0.42
 5 -11 2 3.08 0.48
 -5 -11 -2 1.53 0.41
 -5 11 -2 1.76 0.52
 -5 11 -2 2.58 0.52
 5 11 2 2.65 0.55
 6 -11 2 6.53 0.71
 -6 -11 -2 7.39 0.77
 -6 11 -2 7.26 0.89
 -6 11 -2 9.09 0.83
 6 11 2 6.32 0.83
 -7 -11 -2 1.81 0.47
 7 -11 2 0.9 0.39
 -7 11 -2 1.26 0.54
 7 11 2 1.33 0.55
 -8 -11 -2 21.89 1.23
 8 -11 2 21.93 1.14
 -8 11 -2 21.7 1.33
 8 11 2 18.72 1.27
 9 -11 2 2.66 0.49
 9 11 2 2.03 0.62
 -9 11 -2 2.14 0.58
 10 -11 2 22.65 1.18
 -10 11 -2 20.62 1.4
 10 11 2 22.4 1.42
 11 -11 2 0.95 0.41
 -11 11 -2 0.79 0.57
 11 11 2 0.42 0.61
 12 -11 2 29.92 1.37
 -12 11 -2 27.51 1.66
 12 11 2 27.06 1.7
 13 -11 2 -0.1 0.36
 13 11 2 0.04 0.67
 -13 11 -2 -0.01 0.52
 14 12 -2 17.67 1.36
 -14 12 2 16.35 1.53
 13 -12 -2 2.23 0.45
 -13 12 2 2.4 0.75
 13 12 -2 2.27 0.71
 12 -12 -2 19 1.08
 12 12 -2 19.28 1.39
 -12 12 2 21.1 1.53
 11 -12 -2 2.09 0.48
 11 12 -2 2.9 0.71
 -11 12 2 2.03 0.66
 10 -12 -2 21.26 1.16
 10 12 -2 22.39 1.4
 -10 12 2 23.14 1.51
 9 -12 -2 2.82 0.55
 -9 12 2 2.72 0.71
 9 12 -2 2.6 0.67
 8 -12 -2 13.01 0.96
 -8 -12 2 15.3 1.01
 -8 12 2 13.83 1.27
 8 12 -2 16.98 1.2
 -7 -12 2 0.97 0.41
 7 -12 -2 0.97 0.41
 7 12 -2 0.41 0.44
 -7 12 2 0.43 0.49
 6 -12 -2 5.23 0.67
 -6 -12 2 5.15 0.66
 6 12 -2 5.45 0.76
 -6 12 2 5.7 0.76
 -6 12 2 5.12 0.83
 5 -12 -2 2.14 0.47
 -5 -12 2 2.41 0.46
 -5 12 2 2.9 0.69
 -5 12 2 2.48 0.54
 5 12 -2 2.11 0.52
 -4 -12 2 2.54 0.49
 4 -12 -2 2.47 0.48
 4 12 -2 2.74 0.58
 -4 12 2 2.04 0.53
 3 -12 -2 3.04 0.53
 -3 -12 2 3.1 0.52
 -3 12 2 4.82 0.7
 3 12 -2 2.72 0.61
 -2 -12 2 10.84 0.83
 2 -12 -2 10.51 0.83
 2 12 -2 12.58 0.97
 -2 12 2 12.79 1.03
 -1 -12 2 3.58 0.58
 1 -12 -2 1.77 0.41
 1 12 -2 1.94 0.6
 -1 12 2 2.38 0.54
 0 -12 -2 32.07 1.47
 0 -12 2 35.7 1.56
 0 12 -2 37.23 1.84
 0 12 2 28.94 1.5
 0 12 -2 33.59 1.63
 1 -12 2 18.75 1.09
 -1 -12 -2 18.99 1.1
 -1 12 -2 19.24 1.21
 1 12 2 19.71 1.22
 -1 12 -2 19.36 1.35
 2 -12 2 32.55 1.52
 -2 -12 -2 33.55 1.5
 -2 12 -2 29.83 1.66
 -2 12 -2 34.53 1.62
 2 12 2 32.38 1.56
 -3 -12 -2 3.05 0.54
 3 -12 2 2.65 0.54
 -3 12 -2 3.12 0.6
 3 12 2 3.12 0.64
 -3 12 -2 2.17 0.64
 -4 -12 -2 36.99 1.63
 4 -12 2 35.7 1.6
 -4 12 -2 34.83 1.65
 4 12 2 33.8 1.67
 -4 12 -2 34.77 1.77
 5 -12 2 1.78 0.46
 -5 -12 -2 0.84 0.39
 5 12 2 1.82 0.54
 -5 12 -2 1.84 0.51
 -5 12 -2 1.54 0.57
 6 -12 2 23.72 1.27
 -6 -12 -2 24.76 1.35
 -6 12 -2 24.3 1.32
 -6 12 -2 22.48 1.46
 6 12 2 23.57 1.42
 7 -12 2 -0.05 0.36
 -7 -12 -2 0.1 0.37
 7 12 2 -0.01 0.49
 -7 12 -2 -0.74 0.43
 -8 -12 -2 10.51 1.01
 8 -12 2 10.12 0.9
 8 12 2 9.9 1.07
 -8 12 -2 10.55 1.15
 9 -12 2 0.19 0.39
 9 12 2 0.59 0.57
 -9 12 -2 0 0.51
 10 -12 2 2.42 0.52
 10 12 2 1.07 0.67
 -10 12 -2 2.96 0.71
 11 -12 2 1.13 0.46
 11 12 2 1.2 0.69
 -11 12 -2 0.14 0.53
 12 -12 2 -0.45 0.37
 12 12 2 -0.3 0.64
 -12 12 -2 -0.11 0.57
 13 -13 -2 0.44 0.4
 13 13 -2 0.48 0.67
 -13 13 2 0.69 0.68
 12 -13 -2 -0.28 0.37
 -12 13 2 0.23 0.56
 12 13 -2 -0.16 0.55
 11 -13 -2 0.1 0.39
 -11 13 2 0.08 0.59
 11 13 -2 -0.11 0.58
 10 -13 -2 3 0.58
 -10 13 2 3.36 0.82
 10 13 -2 3.57 0.76
 9 -13 -2 -0.24 0.36
 -9 13 2 -0.57 0.55
 9 13 -2 0.01 0.51
 -8 -13 2 12.11 0.95
 8 -13 -2 7.48 0.84
 -8 13 2 13.98 1.35
 8 13 -2 12.96 1.17
 7 -13 -2 -0.09 0.37
 -7 -13 2 0.89 0.4
 7 13 -2 0.35 0.46
 -7 13 2 0.37 0.53
 6 -13 -2 23.75 1.34
 -6 -13 2 27.95 1.4
 -6 13 2 27.41 1.67
 6 13 -2 25.25 1.47
 -5 -13 2 1.1 0.42
 5 -13 -2 0.25 0.36
 -5 13 2 0.73 0.49
 5 13 -2 0.08 0.5
 -4 -13 2 34.41 1.63
 4 -13 -2 34.57 1.62
 4 13 -2 36.46 1.76
 -4 13 2 37.47 1.69
 3 -13 -2 0.14 0.28
 -3 -13 2 0.51 0.35
 3 13 -2 -0.23 0.4
 -3 13 2 0.36 0.41
 2 -13 -2 12.21 0.92
 -2 -13 2 12 0.9
 -2 13 2 14.22 1.15
 2 13 -2 11.98 1.1
 -1 -13 2 0.07 0.32
 1 -13 -2 0.84 0.36
 -1 13 2 0.39 0.48
 1 13 -2 0.18 0.4
 0 -13 2 5.36 0.7
 0 -13 -2 4.35 0.64
 0 13 -2 4.98 0.75
 0 13 2 5.46 0.76
 1 -13 2 0.5 0.38
 -1 -13 -2 0.08 0.32
 -1 13 -2 -0.36 0.41
 -1 13 -2 0.63 0.52
 1 13 2 0.59 0.51
 -2 -13 -2 2.25 0.51
 2 -13 2 1.84 0.47
 -2 13 -2 3.12 0.74
 -2 13 -2 2.47 0.58
 2 13 2 2.69 0.65
 3 -13 2 0.34 0.36
 -3 -13 -2 0.51 0.4
 -3 13 -2 -0.39 0.44
 3 13 2 0.16 0.49
 -3 13 -2 0.28 0.55
 4 -13 2 0.78 0.43
 -4 -13 -2 2.09 0.53
 4 13 2 0.09 0.52
 -4 13 -2 1.31 0.53
 -4 13 -2 1.16 0.55
 -5 -13 -2 2.89 0.59
 5 -13 2 1.01 0.44
 -5 13 -2 1.9 0.58
 5 13 2 1.35 0.61
 -5 13 -2 1.21 0.6
 -6 -13 -2 2.97 0.59
 6 -13 2 2.9 0.59
 6 13 2 2.16 0.63
 -6 13 -2 5.07 0.92
 -7 -13 -2 2.05 0.54
 7 -13 2 2.61 0.59
 7 13 2 1.55 0.64
 -7 13 -2 0.86 0.63
 8 -13 2 8.33 0.9
 -8 -13 -2 7.4 0.88
 8 13 2 7.42 0.99
 -8 13 -2 7.94 1.05
 9 -13 2 1.29 0.5
 -9 13 -2 1.44 0.64
 9 13 2 1.76 0.69
 10 -13 2 6.85 0.83
 -10 13 -2 8.27 1.12
 10 13 2 8.81 1.1
 11 -13 2 0.45 0.48
 11 13 2 0.74 0.73
 -11 13 -2 0.67 0.67
 12 -14 -2 9.37 0.9
 12 14 -2 8.9 1.09
 -12 14 2 10.72 1.35
 11 -14 -2 2.12 0.57
 -11 14 2 1.04 0.66
 11 14 -2 2.47 0.74
 10 -14 -2 8.02 0.89
 -10 14 2 7.99 1.14
 10 14 -2 8.83 1.04
 9 -14 -2 0.91 0.49
 9 14 -2 2.54 0.71
 -9 14 2 1.7 0.72
 8 -14 -2 7.83 0.85
 -8 -14 2 6.42 0.88
 8 14 -2 6.86 0.94
 -8 14 2 6.34 1
 7 -14 -2 1.34 0.51
 -7 -14 2 1.46 0.49
 -7 14 2 0.62 0.61
 7 14 -2 0.4 0.52
 6 -14 -2 1.56 0.5
 -6 -14 2 1.45 0.47
 6 14 -2 1.55 0.59
 5 -14 -2 0.8 0.43
 -5 -14 2 1.47 0.49
 -5 14 2 0.95 0.52
 5 14 -2 1.29 0.61
 4 -14 -2 0.23 0.39
 -4 -14 2 0.02 0.38
 4 14 -2 -0.06 0.45
 -4 14 2 0.08 0.45
 3 -14 -2 1.33 0.47
 -3 -14 2 1.22 0.47
 3 14 -2 1.33 0.6
 -3 14 2 1.74 0.6
 2 -14 -2 3.27 0.6
 -2 -14 2 5 0.69
 -2 14 2 5.81 0.82
 2 14 -2 4.31 0.76
 1 -14 -2 2.79 0.56
 -1 -14 2 3.31 0.61
 -1 14 2 2.35 0.64
 1 14 -2 2.79 0.68
 0 -14 -2 10.52 0.97
 0 -14 2 8.74 0.87
 0 14 2 8.58 0.97
 0 14 -2 8.36 0.93
 -1 -14 -2 1.79 0.52
 1 -14 2 1 0.44
 1 14 2 1.16 0.59
 -1 14 -2 1.54 0.59
 2 -14 2 13.22 1.03
 -2 -14 -2 13.56 1
 -2 14 -2 12.37 1.14
 -2 14 -2 12.95 1.29
 2 14 2 12.41 1.13
 3 -14 2 3.45 0.62
 -3 -14 -2 3.07 0.61
 -3 14 -2 3.38 0.76
 3 14 2 2.53 0.71
 -3 14 -2 3.24 0.71
 4 -14 2 10.13 0.99
 -4 -14 -2 12.84 0.98
 -4 14 -2 13.12 1.35
 -4 14 -2 12.09 1.12
 4 14 2 10.2 1.02
 -5 -14 -2 1.1 0.46
 5 -14 2 1.42 0.52
 -5 14 -2 2.08 0.68
 -5 14 -2 1.62 0.59
 5 14 2 0.32 0.49
 -6 -14 -2 8.5 0.93
 6 -14 2 4.75 0.73
 6 14 2 6.07 0.95
 -6 14 -2 7.25 1.09
 -7 -14 -2 -0.28 0.43
 7 -14 2 -0.45 0.39
 7 14 2 0.83 0.62
 -7 14 -2 -0.23 0.56
 -8 -14 -2 1.65 0.65
 8 -14 2 2.33 0.63
 -8 14 -2 3.71 0.89
 8 14 2 1.77 0.72
 9 -14 2 0.4 0.5
 9 14 2 -0.09 0.65
 -9 14 -2 0.41 0.67
 10 -14 2 1.78 0.59
 10 14 2 1.04 0.76
 -10 14 -2 1.8 0.78
 11 -15 -2 0.25 0.48
 11 15 -2 1.49 0.75
 -11 15 2 0.5 0.73
 10 -15 -2 0.95 0.52
 -10 15 2 0.41 0.71
 10 15 -2 0.83 0.68
 9 -15 -2 0.4 0.49
 9 15 -2 0.26 0.64
 -9 15 2 0.61 0.62
 8 -15 -2 3.04 0.63
 8 15 -2 3.57 0.8
 -8 15 2 4.4 0.93
 7 -15 -2 -0.18 0.43
 -7 -15 2 0.42 0.42
 7 15 -2 1.16 0.57
 -6 -15 2 7.39 0.84
 6 -15 -2 10.45 1.01
 6 15 -2 9.07 1.04
 5 -15 -2 0.12 0.4
 -5 -15 2 0.16 0.41
 5 15 -2 -0.13 0.48
 -4 -15 2 8.45 0.95
 4 -15 -2 8.85 0.94
 -4 15 2 8.47 0.98
 4 15 -2 7.14 0.97
 3 -15 -2 0.01 0.37
 -3 -15 2 0.42 0.42
 -3 15 2 0.42 0.49
 3 15 -2 0.56 0.58
 -2 -15 2 5.19 0.73
 2 -15 -2 7.48 0.84
 -2 15 2 6.26 0.86
 2 15 -2 7.37 0.91
 1 -15 -2 0.1 0.34
 -1 -15 2 0.36 0.42
 1 15 -2 0.07 0.55
 -1 15 2 0.29 0.51
 0 -15 -2 3.3 0.59
 0 -15 2 3.54 0.65
 0 15 2 2.15 0.64
 0 15 -2 3.85 0.76
 1 -15 2 0.05 0.39
 -1 -15 -2 0.04 0.38
 -1 15 -2 -0.98 0.39
 1 15 2 0.54 0.55
 -2 -15 -2 -0.04 0.39
 2 -15 2 0.18 0.4
 -2 15 -2 -0.03 0.52
 -2 15 -2 -0.12 0.51
 2 15 2 0.43 0.53
 3 -15 2 0.56 0.41
 -3 -15 -2 0.64 0.46
 -3 15 -2 0.04 0.52
 3 15 2 1.08 0.66
 -3 15 -2 1.19 0.72
 -4 -15 -2 -0.03 0.39
 4 -15 2 -0.04 0.43
 -4 15 -2 0.35 0.69
 -4 15 -2 -0.5 0.48
 4 15 2 0.32 0.57
 5 -15 2 -0.78 0.34
 -5 -15 -2 0.15 0.43
 5 15 2 -0.65 0.56
 -5 15 -2 -0.13 0.66
 -6 -15 -2 1.05 0.52
 6 -15 2 0.59 0.5
 -6 15 -2 0.73 0.74
 6 15 2 1.47 0.68
 7 -15 2 1.19 0.58
 -7 -15 -2 1.41 0.58
 7 15 2 1.72 0.74
 -7 15 -2 0.53 0.75
 8 -15 2 1.62 0.63
 -8 15 -2 1.89 0.82
 8 15 2 1.22 0.63
 9 -15 2 0.78 0.6
 9 15 2 0.38 0.71
 -9 15 -2 0.4 0.72
 9 -16 -2 1.89 0.62
 9 16 -2 1.39 0.72
 -9 16 2 0.67 0.7
 8 -16 -2 1.73 0.58
 8 16 -2 1.29 0.72
 7 -16 -2 -0.24 0.43
 -7 -16 2 0.75 0.47
 7 16 -2 1.1 0.64
 6 -16 -2 1.25 0.54
 -6 -16 2 0.7 0.49
 6 16 -2 0.66 0.65
 -5 -16 2 0.01 0.42
 5 -16 -2 0.66 0.46
 5 16 -2 1.34 0.65
 4 -16 -2 0.82 0.48
 -4 -16 2 -0.14 0.4
 -4 16 2 0.5 0.56
 4 16 -2 -0.08 0.56
 3 -16 -2 0.27 0.41
 -3 -16 2 0.63 0.4
 -3 16 2 1.38 0.59
 3 16 -2 0.61 0.55
 2 -16 -2 1.41 0.51
 -2 -16 2 0.81 0.48
 2 16 -2 1.66 0.61
 -2 16 2 1.23 0.6
 1 -16 -2 0.99 0.44
 -1 -16 2 1.58 0.54
 1 16 -2 0.79 0.61
 -1 16 2 1.95 0.6
 0 -16 -2 1.76 0.54
 0 -16 2 2.85 0.67
 0 16 -2 1.55 0.65
 0 16 2 0.84 0.64
 -1 -16 -2 1.31 0.48
 1 -16 2 1.32 0.55
 1 16 2 1.4 0.64
 -1 16 -2 0.56 0.6
 2 -16 2 2.19 0.6
 -2 -16 -2 2.83 0.58
 2 16 2 2.79 0.74
 -2 16 -2 4.33 0.78
 -3 -16 -2 0.57 0.48
 3 -16 2 1.08 0.53
 -3 16 -2 0.24 0.69
 -3 16 -2 0.87 0.59
 3 16 2 0.64 0.62
 4 -16 2 0.92 0.51
 -4 -16 -2 1.61 0.55
 -4 16 -2 2.76 0.88
 4 16 2 0.98 0.62
 -4 16 -2 2.22 0.69
 5 -16 2 0.88 0.54
 -5 -16 -2 0.66 0.51
 -5 16 -2 0.19 0.68
 5 16 2 0.76 0.65
 -6 -16 -2 0.51 0.47
 6 -16 2 0.89 0.54
 6 16 2 0.59 0.66
 -6 16 -2 0.78 0.72
 7 -16 2 0.23 0.55
 -7 -16 -2 0.15 0.49
 7 16 2 0.55 0.7
 -7 16 -2 -0.1 0.72
 8 -16 2 0.28 0.57
 -8 16 -2 -0.35 0.69
 8 16 2 -0.83 0.61
 8 -17 -2 0.92 0.57
 8 17 -2 1.02 0.69
 7 -17 -2 -0.11 0.48
 -7 -17 2 0.21 0.46
 7 17 -2 0.66 0.67
 -6 -17 2 1.59 0.56
 6 -17 -2 1.23 0.56
 6 17 -2 1.8 0.75
 5 -17 -2 0.44 0.49
 -5 -17 2 -0.06 0.44
 5 17 -2 -0.59 0.59
 4 -17 -2 2.24 0.59
 -4 -17 2 2.03 0.61
 4 17 -2 0.8 0.7
 3 -17 -2 0.37 0.46
 -3 -17 2 0.81 0.5
 -3 17 2 0.32 0.6
 3 17 -2 0.79 0.66
 -2 -17 2 0.68 0.52
 2 -17 -2 0.44 0.46
 -2 17 2 0.34 0.58
 2 17 -2 1.18 0.66
 1 -17 -2 0.2 0.44
 -1 -17 2 -0.19 0.43
 1 17 -2 0.54 0.62
 -1 17 2 0.15 0.55
 0 -17 -2 0.88 0.5
 0 -17 2 0.11 0.47
 0 17 2 1.33 0.68
 0 17 -2 1.16 0.69
 1 -17 2 0.09 0.46
 -1 -17 -2 -0.58 0.42
 -1 17 -2 0.73 0.62
 1 17 2 0.27 0.62
 2 -17 2 0.21 0.48
 -2 -17 -2 0.5 0.51
 2 17 2 0.43 0.68
 -2 17 -2 -0.07 0.63
 3 -17 2 0.47 0.47
 -3 -17 -2 -0.61 0.4
 3 17 2 -0.55 0.51
 -3 17 -2 -0.49 0.51
 4 -17 2 0.12 0.48
 -4 -17 -2 -0.61 0.38
 -4 17 -2 -0.67 0.72
 -4 17 -2 0.01 0.71
 4 17 2 -0.71 0.51
 5 -17 2 -0.41 0.47
 -5 -17 -2 -0.55 0.48
 -5 17 -2 -0.94 0.66
 5 17 2 0.61 0.71
 6 -17 2 0.31 0.59
 -6 -17 -2 0.69 0.49
 6 17 2 -0.09 0.65
 -6 17 -2 -0.19 0.75
 -5 -18 2 0.43 0.51
 5 -18 -2 -0.02 0.46
 5 18 -2 0.21 0.65
 -4 -18 2 0.87 0.55
 4 -18 -2 0.16 0.48
 4 18 -2 0.61 0.66
 -3 -18 2 0.27 0.43
 3 -18 -2 -0.19 0.42
 -3 18 2 0.82 0.6
 3 18 -2 0.9 0.66
 2 -18 -2 1.07 0.51
 -2 -18 2 0.09 0.49
 2 18 -2 1.23 0.7
 -2 18 2 -0.14 0.53
 1 -18 -2 0.8 0.53
 -1 -18 2 0.13 0.48
 -1 18 2 0.75 0.66
 1 18 -2 -0.26 0.59
 0 -18 -2 0.7 0.49
 0 -18 2 0.27 0.51
 0 18 -2 1.94 0.72
 0 18 2 0.82 0.71
 1 -18 2 -0.14 0.42
 -1 -18 -2 0.3 0.5
 -1 18 -2 -0.22 0.57
 1 18 2 0.45 0.67
 2 -18 2 0.86 0.54
 -2 -18 -2 1.74 0.6
 2 18 2 0.93 0.68
 -2 18 -2 0.67 0.63
 -3 -18 -2 0.09 0.49
 3 -18 2 0.81 0.56
 -3 18 -2 -0.2 0.6
 3 18 2 0.17 0.67
 18 0 -3 0.18 0.54
 17 0 -3 0.26 0.5
 16 0 -3 0.12 0.44
 15 0 -3 1.44 0.52
 14 0 -3 0.61 0.37
 13 0 -3 1.24 0.4
 12 0 -3 0.27 0.3
 12 0 -3 0.13 0.15
 11 0 -3 1.45 0.34
 11 0 -3 2.11 0.21
 10 0 -3 0.24 0.13
 10 0 -3 0.1 0.21
 9 0 -3 1.19 0.28
 9 0 -3 0.92 0.42
 9 0 -3 1.55 0.15
 9 0 -3 1.34 0.1
 8 0 -3 -0.02 0.16
 8 0 -3 -0.07 0.29
 7 0 -3 0.54 0.17
 7 0 -3 0.15 0.27
 6 0 -3 0.1 0.26
 6 0 -3 -0.2 0.12
 5 0 -3 0.29 0.25
 5 0 -3 0.17 0.13
 4 0 -3 0.6 0.15
 4 0 -3 0.32 0.24
 4 0 -3 0.24 0.04
 3 0 -3 0.73 0.29
 3 0 -3 0.72 0.14
 3 0 -3 0.38 0.06
 2 0 -3 0.75 0.08
 -1 0 3 0.45 0.07
 1 0 -3 0.54 0.08
 0 0 -3 0.07 0.07
 0 0 3 0.15 0.07
 1 0 3 0.12 0.08
 -1 0 -3 0.39 0.1
 -2 0 -3 0.1 0.09
 2 0 3 0.05 0.09
 3 0 3 0.46 0.13
 -3 0 -3 0.53 0.13
 -4 0 -3 0.23 0.12
 4 0 3 -0.03 0.1
 -5 0 -3 4.7 0.31
 5 0 3 5.06 0.32
 6 0 3 0.14 0.14
 -6 0 -3 -0.04 0.12
 -7 0 -3 5.34 0.36
 7 0 3 4.81 0.38
 8 0 3 0.12 0.18
 -8 0 -3 0.37 0.17
 9 0 3 2.52 0.33
 10 0 3 -0.02 0.21
 11 0 3 3.91 0.43
 12 0 3 0.31 0.26
 13 0 3 0.31 0.29
 14 0 3 -0.06 0.28
 15 0 3 -0.03 0.47
 15 0 3 0.1 0.31
 18 -1 -3 0.11 0.52
 18 1 -3 0.77 0.6
 17 -1 -3 2.11 0.63
 17 1 -3 2.35 0.7
 16 -1 -3 1.56 0.58
 16 1 -3 1.73 0.59
 15 -1 -3 1.67 0.48
 15 1 -3 1.22 0.51
 14 -1 -3 0.41 0.4
 14 1 -3 0.25 0.38
 13 -1 -3 1.08 0.39
 13 1 -3 0.92 0.38
 13 1 -3 0.81 0.38
 12 -1 -3 0.01 0.26
 12 -1 -3 0.22 0.13
 12 1 -3 0.32 0.28
 12 1 -3 0.07 0.19
 11 -1 -3 0.21 0.1
 11 -1 -3 0.38 0.26
 11 1 -3 0.23 0.25
 11 1 -3 -0.11 0.16
 10 -1 -3 0.1 0.08
 10 -1 -3 0.27 0.22
 10 -1 -3 0.07 0.07
 10 1 -3 -0.08 0.15
 10 1 -3 0.2 0.26
 9 -1 -3 0.13 0.36
 9 -1 -3 0.19 0.18
 9 1 -3 0.1 0.19
 9 1 -3 0.31 0.15
 9 1 -3 0.06 0.38
 8 -1 -3 0.5 0.2
 8 -1 -3 0.31 0.32
 8 1 -3 0.86 0.41
 8 1 -3 0.64 0.15
 8 1 -3 0.63 0.22
 7 -1 -3 0.07 0.14
 7 -1 -3 0.04 0.29
 7 1 -3 0.12 0.28
 7 1 -3 -0.01 0.1
 7 1 -3 -0.15 0.14
 6 -1 -3 2.18 0.43
 6 -1 -3 1.54 0.24
 6 1 -3 1.71 0.23
 6 1 -3 1.89 0.14
 6 1 -3 1.51 0.36
 5 -1 -3 0.18 0.13
 5 -1 -3 -0.04 0.25
 5 1 -3 0.14 0.25
 5 1 -3 0.13 0.06
 5 1 -3 0.31 0.14
 4 -1 -3 1.49 0.21
 4 -1 -3 1.55 0.09
 4 -1 -3 1.57 0.33
 -4 1 3 2.16 0.18
 4 1 -3 1.82 0.12
 4 1 -3 1.44 0.31
 4 1 -3 1.28 0.17
 3 -1 -3 3.18 0.28
 3 -1 -3 2.6 0.35
 3 -1 -3 3.05 0.22
 3 1 -3 3.63 0.43
 3 1 -3 2.69 0.15
 3 1 -3 2.28 0.2
 2 -1 -3 7.74 0.28
 -2 -1 3 7.47 0.3
 2 1 -3 6.47 0.33
 2 1 -3 7.76 0.29
 1 -1 -3 0.17 0.07
 -1 -1 3 0.18 0.07
 -1 1 3 0.21 0.07
 1 1 -3 0.31 0.08
 0 -1 -3 0.15 0.08
 0 -1 3 0.33 0.09
 0 1 3 0.18 0.09
 0 1 -3 0.31 0.1
 -1 -1 -3 0.65 0.12
 1 -1 3 0.58 0.12
 1 1 3 0.73 0.13
 -1 1 -3 0.72 0.13
 2 -1 3 0.67 0.12
 -2 -1 -3 0.75 0.14
 -2 1 -3 0.65 0.13
 2 1 3 0.72 0.14
 -3 -1 -3 0.23 0.11
 3 -1 3 0.03 0.08
 3 1 3 0.27 0.12
 -3 1 -3 0.12 0.1
 -4 -1 -3 1.86 0.2
 4 -1 3 1.67 0.21
 -4 1 -3 1.92 0.22
 4 1 3 2.15 0.22
 5 -1 3 0.01 0.11
 -5 -1 -3 0.2 0.12
 -5 1 -3 0 0.11
 5 1 3 0.01 0.12
 6 -1 3 0.24 0.15
 -6 -1 -3 0.42 0.15
 6 1 3 0.09 0.15
 -6 1 -3 0.57 0.16
 7 -1 3 0.65 0.19
 -7 -1 -3 0.62 0.19
 -7 1 -3 0.36 0.16
 7 1 3 0.36 0.19
 -8 -1 -3 0.48 0.19
 8 -1 3 0.19 0.18
 -8 1 -3 0.25 0.17
 8 1 3 0.11 0.19
 9 -1 3 4.01 0.39
 9 1 3 4.5 0.42
 10 -1 3 1.15 0.28
 10 1 3 1.08 0.29
 11 -1 3 3.4 0.4
 11 1 3 3.63 0.43
 12 -1 3 1.01 0.3
 12 1 3 1.62 0.34
 13 -1 3 4.47 0.51
 13 1 3 5.87 0.57
 14 -1 3 -0.33 0.35
 14 -1 3 0.58 0.32
 14 1 3 0.09 0.3
 15 -1 3 4.46 0.54
 15 -1 3 4.95 0.8
 15 1 3 4.37 0.56
 18 -2 -3 -0.37 0.53
 18 2 -3 0.1 0.61
 17 -2 -3 0.78 0.54
 17 2 -3 0.31 0.47
 16 -2 -3 1.35 0.49
 16 2 -3 1.44 0.55
 15 -2 -3 1.43 0.5
 15 2 -3 2.26 0.57
 14 -2 -3 2.8 0.56
 14 2 -3 2.81 0.57
 13 -2 -3 -0.03 0.27
 13 2 -3 0.15 0.3
 13 2 -3 -0.1 0.23
 12 -2 -3 6.42 0.37
 12 -2 -3 6.68 0.67
 12 2 -3 6.7 0.68
 12 2 -3 7.28 0.5
 11 -2 -3 2.13 0.39
 11 -2 -3 2.1 0.16
 11 2 -3 2.26 0.31
 11 2 -3 2.03 0.38
 10 -2 -3 7.46 0.28
 10 -2 -3 7.25 0.57
 10 2 -3 7.35 0.57
 10 2 -3 6.77 0.45
 9 -2 -3 0.18 0.41
 9 -2 -3 0.38 0.1
 9 -2 -3 0.35 0.07
 9 -2 -3 0.42 0.21
 9 2 -3 0.26 0.23
 9 2 -3 0.29 0.18
 9 2 -3 -0.11 0.38
 8 -2 -3 4.11 0.22
 8 -2 -3 4.81 0.45
 8 -2 -3 4.16 0.17
 8 -2 -3 3.59 0.57
 8 2 -3 4.77 0.44
 8 2 -3 3.62 0.6
 8 2 -3 3.83 0.33
 7 -2 -3 0.29 0.17
 7 -2 -3 0 0.31
 7 -2 -3 0.15 0.05
 7 2 -3 -0.3 0.27
 7 2 -3 0.07 0.14
 7 2 -3 0.18 0.17
 6 -2 -3 2.82 0.45
 6 -2 -3 2.68 0.12
 6 -2 -3 2.56 0.29
 6 2 -3 3.19 0.31
 6 2 -3 2.24 0.4
 6 2 -3 2.68 0.23
 5 -2 -3 0.24 0.07
 5 -2 -3 0.03 0.25
 5 -2 -3 0.27 0.13
 5 2 -3 0.25 0.12
 5 2 -3 0.29 0.26
 -5 2 3 0.2 0.12
 5 2 -3 0.09 0.1
 4 -2 -3 0.32 0.16
 4 -2 -3 0.48 0.11
 4 -2 -3 0.95 0.28
 -4 2 3 0.56 0.16
 4 2 -3 0.46 0.13
 4 2 -3 0.35 0.1
 4 2 -3 0.47 0.24
 3 -2 -3 0.96 0.27
 -3 -2 3 0.51 0.09
 3 -2 -3 0.88 0.19
 3 -2 -3 0.25 0.07
 3 2 -3 0.3 0.09
 3 2 -3 0.81 0.17
 3 2 -3 0.23 0.1
 3 2 -3 0.64 0.26
 -2 -2 3 0.61 0.09
 2 -2 -3 0.74 0.1
 -2 2 3 0.79 0.11
 2 2 -3 0.83 0.12
 2 2 -3 1.09 0.14
 2 2 -3 1.07 0.14
 -1 -2 3 0.26 0.08
 1 -2 -3 0.13 0.07
 -1 2 3 0.22 0.08
 1 2 -3 0.19 0.09
 0 -2 3 1.83 0.16
 0 -2 -3 2 0.17
 0 2 3 2.04 0.18
 0 2 -3 1.85 0.17
 1 -2 3 0.81 0.14
 -1 -2 -3 0.9 0.13
 1 2 3 1.15 0.15
 -1 2 -3 1.2 0.16
 2 -2 3 6.18 0.32
 -2 -2 -3 6.77 0.34
 2 2 3 6.9 0.35
 -2 2 -3 6.87 0.34
 3 -2 3 1.99 0.21
 -3 -2 -3 2.53 0.23
 3 2 3 2.08 0.23
 -3 2 -3 1.72 0.19
 4 -2 3 10.25 0.46
 -4 -2 -3 10.16 0.47
 4 2 3 9.65 0.47
 -4 2 -3 10.12 0.46
 -5 -2 -3 4.36 0.32
 5 -2 3 4.83 0.32
 -5 2 -3 4.75 0.32
 5 2 3 4.31 0.33
 -6 -2 -3 14.88 0.64
 6 -2 3 14.98 0.63
 6 2 3 15.64 0.67
 -6 2 -3 14.59 0.62
 7 -2 3 6.86 0.42
 -7 2 -3 7.02 0.42
 7 2 3 6.75 0.47
 8 -2 3 11.13 0.58
 8 2 3 12.27 0.63
 -8 2 -3 11.09 0.56
 9 -2 3 4.62 0.42
 9 2 3 4.87 0.44
 10 -2 3 2.15 0.33
 10 2 3 2.98 0.38
 11 -2 3 0.6 0.26
 11 2 3 0.73 0.3
 12 -2 3 0.53 0.27
 12 2 3 0.81 0.31
 13 -2 3 0.38 0.29
 13 -2 3 -0.15 0.37
 13 2 3 0.92 0.34
 14 -2 3 0.84 0.31
 14 -2 3 0.31 0.42
 14 2 3 -0.23 0.3
 15 -2 3 -0.31 0.37
 15 -2 3 -0.21 0.3
 15 2 3 -0.08 0.33
 18 -3 -3 7.18 0.97
 18 3 -3 8.01 1.05
 17 -3 -3 1.6 0.56
 17 3 -3 1.84 0.64
 16 -3 -3 7.53 0.88
 16 3 -3 8.44 0.95
 15 -3 -3 0.6 0.45
 15 3 -3 0.73 0.48
 14 -3 -3 1.06 0.42
 14 3 -3 2.01 0.5
 13 -3 -3 -0.11 0.31
 13 3 -3 -0.54 0.24
 13 3 -3 0.24 0.33
 12 -3 -3 0.38 0.32
 12 -3 -3 0.24 0.11
 12 3 -3 0.32 0.35
 12 3 -3 0.52 0.29
 11 -3 -3 -0.07 0.09
 11 -3 -3 -0.17 0.2
 11 3 -3 0.18 0.25
 11 3 -3 -0.05 0.28
 10 -3 -3 0.57 0.26
 10 -3 -3 0.91 0.11
 10 3 -3 0.82 0.31
 10 3 -3 0.48 0.25
 9 -3 -3 0.05 0.07
 9 -3 -3 -0.05 0.19
 9 -3 -3 -0.3 0.33
 9 3 -3 0.1 0.23
 9 3 -3 -0.09 0.37
 9 3 -3 -0.34 0.19
 8 -3 -3 6.04 0.52
 8 -3 -3 7.01 0.78
 8 -3 -3 6.08 0.25
 8 3 -3 5.47 0.66
 8 3 -3 6.97 0.5
 8 3 -3 5.4 0.44
 7 -3 -3 0.19 0.17
 7 -3 -3 0.1 0.28
 7 -3 -3 0.14 0.07
 7 3 -3 0.01 0.16
 7 3 -3 -0.4 0.24
 7 3 -3 -0.07 0.16
 6 -3 -3 11.2 0.79
 6 -3 -3 11.82 0.4
 -6 -3 3 11.31 0.54
 6 -3 -3 10.96 0.55
 6 3 -3 11.77 0.54
 6 3 -3 10.22 0.52
 6 3 -3 9.9 0.71
 -6 3 3 11.55 0.52
 5 -3 -3 0.21 0.14
 5 -3 -3 0.16 0.24
 -5 -3 3 0.06 0.1
 5 -3 -3 0.18 0.11
 5 3 -3 0.22 0.23
 5 3 -3 0.17 0.14
 -5 3 3 0.26 0.15
 5 3 -3 0.14 0.13
 4 -3 -3 11.02 0.67
 4 -3 -3 10.84 0.47
 -4 -3 3 11.32 0.45
 4 -3 -3 10.37 0.52
 4 3 -3 10.78 0.47
 4 3 -3 10.51 0.44
 -4 3 3 10 0.56
 4 3 -3 10.48 0.63
 3 -3 -3 1.01 0.14
 -3 -3 3 0.69 0.13
 3 -3 -3 0.59 0.23
 3 3 -3 0.9 0.15
 3 3 -3 0.59 0.11
 3 3 -3 0.57 0.2
 3 3 -3 0.91 0.27
 -3 3 3 0.66 0.15
 -2 -3 3 7.24 0.33
 2 -3 -3 6.86 0.32
 2 3 -3 7.89 0.42
 2 3 -3 7.09 0.29
 2 3 -3 7.01 0.33
 -2 3 3 7.44 0.34
 1 -3 -3 0.1 0.09
 -1 -3 3 0.37 0.1
 -1 3 3 0.36 0.12
 1 3 -3 0.49 0.14
 1 3 -3 0.31 0.12
 0 -3 -3 9.54 0.4
 0 -3 3 9.55 0.4
 0 3 3 9.74 0.42
 0 3 -3 9.57 0.41
 1 -3 3 0.77 0.14
 -1 -3 -3 1.28 0.18
 1 3 3 1.44 0.19
 -1 3 -3 0.92 0.16
 2 -3 3 8.25 0.4
 -2 -3 -3 8.36 0.4
 -2 3 -3 8.82 0.41
 2 3 3 9.02 0.42
 -3 -3 -3 -0.11 0.09
 3 -3 3 0.05 0.1
 -3 3 -3 0.07 0.1
 3 3 3 0.14 0.13
 -4 -3 -3 0.6 0.17
 4 -3 3 0.59 0.15
 4 3 3 0.32 0.17
 -4 3 -3 0.68 0.16
 -5 -3 -3 -0.07 0.11
 5 -3 3 -0.08 0.11
 5 3 3 0.15 0.15
 -5 3 -3 -0.04 0.12
 6 -3 3 -0.03 0.13
 -6 -3 -3 0.26 0.15
 -6 3 -3 -0.02 0.13
 6 3 3 0.09 0.17
 -7 -3 -3 1.74 0.26
 7 -3 3 2.31 0.28
 7 3 3 1.81 0.29
 -7 3 -3 1.86 0.27
 -8 -3 -3 6.49 0.45
 8 -3 3 6.85 0.44
 8 3 3 6.82 0.51
 -8 3 -3 5.01 0.4
 9 -3 3 0.03 0.18
 9 3 3 0.16 0.22
 10 -3 3 5.94 0.49
 10 3 3 5.8 0.53
 11 -3 3 6.21 0.53
 11 3 3 7.49 0.63
 12 -3 3 14.65 0.96
 12 -3 3 13.54 0.77
 12 3 3 14.58 0.84
 13 -3 3 4.95 0.51
 13 -3 3 5.39 0.71
 13 3 3 4.82 0.56
 14 -3 3 13.88 1.03
 14 -3 3 13.31 0.8
 14 3 3 10.82 0.82
 15 -3 3 7.55 0.89
 15 -3 3 6.92 0.63
 15 3 3 6.87 0.72
 18 -4 -3 1.47 0.61
 18 4 -3 0.81 0.66
 17 -4 -3 1.4 0.53
 17 4 -3 0.71 0.52
 16 -4 -3 5.81 0.79
 16 4 -3 4.29 0.79
 15 -4 -3 0.97 0.43
 15 4 -3 1 0.47
 14 -4 -3 23.7 1.25
 14 4 -3 21.98 1.05
 14 4 -3 25.1 1.35
 13 -4 -3 1.55 0.42
 13 4 -3 2.21 0.51
 13 4 -3 0.73 0.34
 12 -4 -3 14.99 0.54
 12 -4 -3 15.11 0.89
 12 4 -3 14.44 0.96
 12 4 -3 15.7 0.84
 11 -4 -3 0.45 0.29
 11 -4 -3 0.63 0.13
 11 4 -3 0.08 0.27
 11 4 -3 0.18 0.31
 10 -4 -3 23.65 1.09
 10 -4 -3 26.85 0.81
 10 4 -3 26.95 1.17
 10 4 -3 24.41 1.07
 -9 -4 3 -0.02 0.17
 9 -4 -3 -0.04 0.09
 9 -4 -3 -0.16 0.42
 9 -4 -3 0.19 0.21
 9 4 -3 -0.08 0.24
 8 -4 -3 20.01 0.64
 8 -4 -3 20.21 0.88
 8 -4 -3 19.05 1.17
 -8 -4 3 18.89 0.8
 -8 4 3 20 0.83
 8 4 -3 19.85 1.08
 8 4 -3 18.09 0.83
 7 -4 -3 0.57 0.33
 7 -4 -3 0.21 0.1
 7 -4 -3 0.09 0.16
 -7 -4 3 0.13 0.15
 -7 4 3 0.04 0.15
 7 4 -3 0.08 0.2
 7 4 -3 0.1 0.27
 6 -4 -3 10.93 0.58
 6 -4 -3 12.39 0.8
 6 -4 -3 11.66 0.47
 -6 -4 3 10.71 0.54
 6 4 -3 11.01 0.71
 6 4 -3 11.4 0.59
 -6 4 3 11.08 0.59
 -5 -4 3 0.31 0.14
 5 -4 -3 0.42 0.17
 5 -4 -3 0.66 0.17
 5 -4 -3 0.41 0.26
 5 4 -3 0.51 0.24
 5 4 -3 0.27 0.18
 -5 4 3 0.25 0.2
 4 -4 -3 0.93 0.27
 4 -4 -3 1.45 0.23
 -4 -4 3 1.19 0.2
 4 -4 -3 1.03 0.22
 4 4 -3 1.21 0.16
 4 4 -3 1.12 0.21
 -4 4 3 1.55 0.25
 4 4 -3 1.01 0.27
 -4 4 3 1.12 0.28
 -3 -4 3 0.28 0.13
 3 -4 -3 0.11 0.12
 3 -4 -3 0.24 0.2
 3 4 -3 0.28 0.22
 3 4 -3 0.67 0.24
 3 4 -3 0.37 0.1
 -3 4 3 0.36 0.17
 3 4 -3 0.48 0.16
 2 -4 -3 0.37 0.13
 2 -4 -3 0.37 0.19
 -2 -4 3 0.18 0.11
 -2 4 3 0.66 0.17
 2 4 -3 0.39 0.08
 2 4 -3 0.49 0.15
 2 4 -3 0.35 0.2
 -1 -4 3 1.84 0.21
 1 -4 -3 1.46 0.18
 1 4 -3 1.94 0.25
 1 4 -3 1.62 0.21
 -1 4 3 1.76 0.22
 0 -4 3 6.26 0.34
 0 -4 -3 6.67 0.35
 0 4 3 5.72 0.34
 0 4 -3 6.39 0.37
 -1 -4 -3 0.84 0.17
 1 -4 3 0.82 0.15
 1 4 3 0.9 0.19
 -1 4 -3 1.1 0.17
 -2 -4 -3 20.92 0.78
 2 -4 3 20.55 0.76
 -2 4 -3 21.9 0.78
 2 4 3 21.31 0.8
 -3 -4 -3 2.47 0.27
 3 -4 3 2.44 0.25
 -3 4 -3 2.28 0.25
 3 4 3 3.04 0.31
 -4 -4 -3 40.3 1.36
 4 -4 3 43.51 1.36
 4 4 3 40.87 1.39
 -4 4 -3 42.91 1.36
 5 -4 3 0.32 0.15
 -5 -4 -3 0.15 0.15
 5 4 3 0.01 0.17
 -5 4 -3 0.15 0.14
 6 -4 3 35.45 1.19
 -6 -4 -3 33.33 1.21
 6 4 3 33.33 1.23
 -6 4 -3 35.59 1.2
 -7 -4 -3 2.38 0.32
 7 -4 3 2.63 0.31
 -7 4 -3 2.38 0.3
 7 4 3 2.52 0.35
 8 -4 3 14.21 0.66
 -8 -4 -3 13.28 0.68
 -8 4 -3 13.81 0.65
 8 4 3 13.86 0.73
 9 -4 3 0.41 0.22
 9 4 3 0.39 0.27
 10 -4 3 14.95 0.85
 10 -4 3 14.3 0.73
 10 4 3 14.44 0.82
 11 -4 3 3.72 0.51
 11 -4 3 4.44 0.45
 11 4 3 3.95 0.5
 12 -4 3 1.72 0.36
 12 -4 3 2.64 0.51
 12 4 3 1.5 0.4
 13 -4 3 0.46 0.4
 13 -4 3 0.93 0.32
 13 4 3 1.71 0.44
 14 -4 3 0.15 0.29
 14 -4 3 0.37 0.4
 14 4 3 -0.36 0.33
 15 -4 3 -0.13 0.4
 15 -4 3 0.06 0.31
 15 4 3 0.05 0.39
 17 -5 -3 0.05 0.46
 17 5 -3 0.27 0.55
 16 -5 -3 13.98 1.07
 16 5 -3 16.35 1.24
 15 -5 -3 0.76 0.43
 15 5 -3 0.53 0.47
 14 -5 -3 9.31 0.84
 14 5 -3 10.4 0.76
 14 5 -3 10.91 0.99
 13 -5 -3 0.07 0.31
 13 5 -3 -0.33 0.37
 13 5 -3 0.53 0.35
 12 -5 -3 1.63 0.37
 12 -5 -3 1.73 0.2
 12 5 -3 1.78 0.41
 12 5 -3 2.36 0.49
 11 -5 -3 0.02 0.26
 11 -5 -3 -0.04 0.12
 11 5 -3 -0.16 0.27
 -11 5 3 -0.02 0.22
 11 5 -3 -0.16 0.29
 10 -5 -3 2.96 0.24
 10 -5 -3 2.92 0.44
 10 5 -3 2.47 0.43
 -10 5 3 3 0.39
 9 -5 -3 0.33 0.25
 -9 -5 3 0.14 0.23
 9 -5 -3 0.13 0.12
 9 5 -3 0.05 0.27
 -9 5 3 0.02 0.2
 8 -5 -3 7.4 0.37
 -8 -5 3 8.68 0.53
 8 -5 -3 7.21 0.53
 8 -5 -3 6.7 0.75
 8 5 -3 7.38 0.6
 -8 5 3 7.55 0.53
 8 5 -3 7.89 0.71
 7 -5 -3 0.77 0.23
 -7 -5 3 1.34 0.25
 7 -5 -3 1.59 0.2
 7 -5 -3 1.15 0.4
 7 5 -3 1.53 0.37
 7 5 -3 0.3 0.26
 -7 5 3 1.12 0.26
 6 -5 -3 39.22 1.25
 6 -5 -3 37.59 1.53
 6 -5 -3 37.62 1.33
 -6 -5 3 35.3 1.3
 6 5 -3 36.81 1.36
 6 5 -3 38.22 1.43
 -6 5 3 38.08 1.24
 -6 5 3 37.23 1.39
 5 -5 -3 0.37 0.17
 -5 -5 3 0.42 0.18
 5 -5 -3 0.18 0.23
 5 -5 -3 0.09 0.17
 5 5 -3 0.25 0.22
 -5 5 3 0.15 0.18
 5 5 -3 0.4 0.23
 -5 5 3 0.39 0.23
 -4 -5 3 49.58 1.63
 4 -5 -3 49.03 1.74
 4 -5 -3 50.64 1.64
 4 5 -3 52.04 1.69
 -4 5 3 48.31 1.64
 -4 5 3 52.04 1.82
 4 5 -3 51.54 1.66
 3 -5 -3 1.81 0.26
 -3 -5 3 2.12 0.28
 3 -5 -3 1.96 0.3
 3 5 -3 1.75 0.36
 -3 5 3 2.04 0.3
 3 5 -3 1.9 0.28
 3 5 -3 1.61 0.16
 3 5 -3 1.44 0.27
 2 -5 -3 36.82 1.29
 2 -5 -3 36.69 1.23
 -2 -5 3 39.55 1.25
 2 5 -3 35.25 1.38
 -2 5 3 36.48 1.25
 2 5 -3 37.08 1.26
 2 5 -3 36.71 1.04
 -1 -5 3 0.1 0.12
 1 -5 -3 0.07 0.12
 1 5 -3 0.55 0.22
 1 5 -3 0.15 0.16
 -1 5 3 0.19 0.15
 0 -5 -3 44.09 1.43
 0 -5 3 44.55 1.43
 0 5 3 44.37 1.45
 0 5 -3 46.48 1.45
 0 5 -3 44.63 1.51
 -1 -5 -3 0.36 0.14
 1 -5 3 0.24 0.12
 1 -5 3 0.13 0.06
 1 5 3 -0.01 0.15
 -1 5 -3 0.1 0.14
 -2 -5 -3 26.12 0.97
 2 -5 3 27.2 0.83
 2 -5 3 26.53 0.95
 -2 5 -3 26.78 0.97
 2 5 3 28.18 1
 -3 -5 -3 1.04 0.19
 3 -5 3 1.5 0.17
 3 -5 3 1.46 0.21
 -3 5 -3 1.36 0.22
 3 5 3 0.91 0.21
 4 -5 3 7.13 0.42
 -4 -5 -3 6.03 0.41
 4 -5 3 6.09 0.35
 4 5 3 5.62 0.44
 -4 5 -3 6.22 0.41
 5 -5 3 0.01 0.15
 -5 -5 -3 -0.02 0.15
 5 -5 3 0.13 0.13
 -5 5 -3 0.12 0.16
 5 5 3 -0.01 0.19
 6 -5 3 0.74 0.21
 6 -5 3 0.91 0.22
 -6 -5 -3 0.89 0.22
 6 5 3 0.61 0.26
 -6 5 -3 0.92 0.22
 -7 -5 -3 0.37 0.21
 7 -5 3 0.47 0.19
 7 -5 3 0.21 0.19
 -7 5 -3 0.4 0.19
 7 5 3 0.44 0.25
 8 -5 3 5.42 0.43
 8 -5 3 5.24 0.49
 -8 -5 -3 5.33 0.5
 -8 5 -3 5.86 0.45
 8 5 3 6.2 0.55
 9 -5 3 0.9 0.24
 9 -5 3 0.75 0.28
 9 5 3 0.73 0.3
 10 -5 3 25.79 1.15
 10 -5 3 25.59 1.05
 10 5 3 26.63 1.16
 11 -5 3 2.49 0.45
 11 -5 3 2.02 0.35
 11 5 3 2.19 0.44
 12 -5 3 24.8 1.08
 12 -5 3 26.07 1.25
 12 5 3 25.91 1.22
 13 -5 3 5.53 0.68
 13 -5 3 4.21 0.5
 13 5 3 5.37 0.65
 14 -5 3 21.31 1.25
 14 -5 3 19.58 1
 14 5 3 20.02 1.16
 15 -5 3 4.75 0.74
 15 -5 3 4.9 0.56
 15 5 3 3.93 0.66
 17 -6 -3 0.69 0.5
 17 6 -3 0.82 0.55
 16 -6 -3 9.99 0.98
 16 6 -3 8.62 0.99
 15 -6 -3 0.63 0.43
 15 6 -3 0.67 0.51
 15 6 -3 1.11 0.43
 14 -6 -3 24.55 1.3
 14 6 -3 26.97 1.42
 14 6 -3 24 1.21
 -14 6 3 25.79 1.28
 13 -6 -3 0.87 0.38
 13 6 -3 -0.09 0.4
 -13 6 3 0.24 0.31
 13 6 -3 0.53 0.37
 12 -6 -3 48.04 1.8
 12 -6 -3 43.55 1.39
 12 6 -3 44.58 1.73
 -12 6 3 45.74 1.76
 12 6 -3 46.45 1.85
 11 -6 -3 0.19 0.29
 11 -6 -3 -0.01 0.14
 -11 6 3 0.32 0.28
 11 6 -3 -0.22 0.31
 10 -6 -3 37.63 1.5
 10 -6 -3 40.38 1.24
 10 6 -3 38.82 1.52
 -10 6 3 37.39 1.5
 9 -6 -3 0.57 0.28
 -9 -6 3 0.58 0.32
 9 -6 -3 0.5 0.16
 -9 6 3 0.62 0.28
 9 6 -3 0.42 0.32
 -8 -6 3 36.92 1.37
 8 -6 -3 37.52 1.39
 8 -6 -3 36.62 1.21
 8 -6 -3 35.53 1.65
 8 6 -3 36.61 1.43
 -8 6 3 35.35 1.41
 7 -6 -3 4.15 0.37
 7 -6 -3 4.64 0.45
 7 -6 -3 4.33 0.57
 -7 -6 3 4.31 0.44
 -7 6 3 4.1 0.48
 -7 6 3 4.06 0.36
 7 6 -3 4.24 0.48
 7 6 -3 5.95 0.57
 6 -6 -3 14.97 0.87
 6 -6 -3 14.98 0.72
 6 -6 -3 16.09 0.71
 -6 -6 3 14.7 0.73
 6 6 -3 14.2 0.76
 -6 6 3 13.68 0.68
 6 6 -3 13.25 0.78
 -6 6 3 14.17 0.81
 -5 -6 3 0.06 0.17
 5 -6 -3 0.08 0.16
 5 -6 -3 0.07 0.17
 5 -6 -3 -0.08 0.2
 5 6 -3 0.02 0.2
 -5 6 3 0.16 0.21
 -5 6 3 0.46 0.27
 5 6 -3 -0.28 0.21
 -4 -6 3 6.8 0.48
 4 -6 -3 6.68 0.51
 4 -6 -3 5.96 0.46
 4 6 -3 6.93 0.53
 -4 6 3 6.69 0.5
 -4 6 3 6.29 0.63
 4 6 -3 6.7 0.45
 -3 -6 3 1.56 0.29
 3 -6 -3 1.85 0.31
 3 -6 -3 1.42 0.27
 -3 6 3 0.98 0.27
 3 6 -3 1.45 0.31
 3 6 -3 1.57 0.26
 2 -6 -3 1.95 0.27
 2 -6 -3 1.78 0.26
 -2 -6 3 1.29 0.24
 -2 6 3 2.02 0.29
 2 6 -3 2.05 0.12
 2 6 -3 2.6 0.45
 2 6 -3 1.16 0.25
 1 -6 -3 0.1 0.14
 -1 -6 3 0.06 0.15
 1 6 -3 0.06 0.18
 -1 6 3 0.15 0.17
 1 6 -3 0.4 0.24
 0 -6 3 13.5 0.64
 0 -6 -3 14.66 0.66
 0 6 -3 13.73 0.72
 0 6 -3 14.89 0.67
 0 6 3 14.88 0.7
 1 -6 3 0.1 0.07
 1 -6 3 0.12 0.13
 -1 -6 -3 0.41 0.19
 -1 6 -3 -0.07 0.18
 1 6 3 0.16 0.2
 -1 6 -3 0.05 0.16
 -2 -6 -3 56.88 1.9
 2 -6 3 58.36 1.88
 2 -6 3 59.79 1.72
 -2 6 -3 65.03 2.03
 -2 6 -3 61.57 1.91
 -3 -6 -3 2.71 0.32
 3 -6 3 2.84 0.32
 3 -6 3 2.76 0.22
 3 6 3 2.78 0.35
 -3 6 -3 2.89 0.32
 4 -6 3 49.62 1.6
 4 -6 3 48.93 1.49
 -4 -6 -3 48.14 1.63
 4 6 3 48.19 1.66
 -4 6 -3 47.59 1.6
 -5 -6 -3 0.02 0.17
 5 -6 3 0.02 0.16
 5 -6 3 0.07 0.13
 5 6 3 0.01 0.21
 -5 6 -3 0.02 0.18
 6 -6 3 62.08 1.97
 -6 -6 -3 65.46 2.08
 6 -6 3 63.96 2.03
 6 6 3 62.77 2.09
 -6 6 -3 63.35 2.03
 7 -6 3 0.68 0.23
 -7 -6 -3 0.67 0.24
 7 -6 3 0.6 0.23
 -7 6 -3 0.97 0.26
 7 6 3 0.48 0.28
 -8 -6 -3 51.02 1.76
 8 -6 3 50.14 1.69
 8 -6 3 50.17 1.71
 8 6 3 47.65 1.78
 9 -6 3 5.74 0.53
 9 -6 3 6.02 0.51
 9 6 3 6.87 0.65
 10 -6 3 20.25 0.99
 10 -6 3 21.51 0.95
 10 6 3 20.05 1.05
 11 -6 3 3.1 0.48
 11 -6 3 2.45 0.39
 11 6 3 3.07 0.52
 12 -6 3 5.29 0.53
 12 -6 3 3.95 0.55
 12 6 3 4.83 0.64
 13 -6 3 0.39 0.39
 13 -6 3 0.64 0.31
 13 6 3 0.38 0.43
 14 -6 3 -0.67 0.35
 14 -6 3 -0.12 0.3
 14 6 3 0.54 0.47
 17 -7 -3 0.3 0.5
 17 7 -3 0.38 0.55
 16 -7 -3 23.3 1.35
 16 7 -3 19.2 1.36
 15 -7 -3 0.16 0.4
 15 7 -3 0.13 0.5
 15 7 -3 0.09 0.39
 14 -7 -3 12.11 1.01
 14 7 -3 12.05 1.05
 14 7 -3 12.62 0.91
 -14 7 3 11.33 0.89
 13 -7 -3 0.43 0.26
 13 -7 -3 0.67 0.37
 13 7 -3 0.11 0.38
 -13 7 3 0.32 0.36
 13 7 -3 0.4 0.4
 12 -7 -3 2.37 0.28
 12 -7 -3 2.69 0.51
 12 7 -3 3.03 0.55
 -12 7 3 3.16 0.52
 11 -7 -3 1.22 0.37
 11 -7 -3 0.9 0.21
 -11 7 3 0.52 0.34
 11 7 -3 0.77 0.41
 10 -7 -3 1.23 0.34
 10 -7 -3 1.13 0.23
 -10 7 3 1.02 0.36
 10 7 -3 1.03 0.39
 9 -7 -3 1.41 0.34
 9 -7 -3 1.37 0.24
 9 7 -3 0.59 0.37
 -9 7 3 0.5 0.32
 8 -7 -3 25.3 0.96
 8 -7 -3 26.08 1.09
 -8 -7 3 25.34 1.1
 -8 7 3 22.65 1.16
 8 7 -3 24.28 1.17
 7 -7 -3 0.24 0.2
 7 -7 -3 -0.15 0.29
 -7 -7 3 0.1 0.21
 7 -7 -3 0 0.21
 -7 7 3 0.16 0.28
 7 7 -3 -0.39 0.29
 -7 7 3 0.26 0.21
 6 -7 -3 33.41 1.31
 6 -7 -3 36.75 1.33
 -6 -7 3 36.08 1.36
 6 -7 -3 36.55 1.46
 6 7 -3 35.73 1.42
 -6 7 3 32.28 1.3
 -6 7 3 33.35 1.47
 6 7 -3 36.21 1.3
 -5 -7 3 1.52 0.3
 5 -7 -3 2.24 0.38
 5 -7 -3 2.36 0.36
 5 7 -3 2.62 0.43
 5 7 -3 2.6 0.32
 -5 7 3 2.6 0.48
 -5 7 3 3.04 0.41
 4 -7 -3 67.33 2.17
 -4 -7 3 64.49 2.18
 4 -7 -3 65.87 2.17
 4 7 -3 67.15 2.02
 -4 7 3 66.57 2.2
 4 7 -3 63.21 2.21
 -4 7 3 71.33 2.44
 3 -7 -3 2.91 0.39
 3 -7 -3 3.51 0.37
 -3 -7 3 3.58 0.41
 3 7 -3 3.27 0.31
 3 7 -3 3.64 0.46
 -3 7 3 2.71 0.39
 2 -7 -3 69.72 2.27
 -2 -7 3 70.13 2.26
 2 -7 -3 70.94 2.16
 2 7 -3 68.8 2.46
 2 7 -3 71.53 2.3
 -2 7 3 71.27 2.3
 1 -7 -3 0.23 0.19
 1 -7 -3 0.25 0.15
 -1 -7 3 0.09 0.18
 -1 7 3 0.22 0.23
 1 7 -3 0.07 0.22
 1 7 -3 -0.05 0.27
 0 -7 -3 34.26 1.29
 0 -7 3 35.5 1.3
 0 7 -3 34.63 1.41
 0 7 -3 36.39 1.33
 0 7 3 36.66 1.34
 -1 -7 -3 -0.07 0.14
 1 -7 3 -0.08 0.15
 1 7 3 -0.1 0.19
 -1 7 -3 -0.11 0.21
 -1 7 -3 -0.14 0.2
 2 -7 3 29.06 0.9
 -2 -7 -3 28.7 1.13
 2 -7 3 30.49 1.13
 2 7 3 27.36 1.16
 -2 7 -3 29.16 1.14
 -2 7 -3 30.79 1.24
 -3 -7 -3 0.86 0.25
 3 -7 3 0.89 0.16
 3 -7 3 0.64 0.2
 -3 7 -3 0.64 0.25
 3 7 3 0.77 0.29
 -3 7 -3 0.4 0.2
 4 -7 3 2.69 0.35
 -4 -7 -3 3.12 0.39
 4 -7 3 2.85 0.27
 -4 7 -3 3.62 0.42
 4 7 3 2.43 0.4
 -5 -7 -3 0.81 0.24
 5 -7 3 0.78 0.23
 5 -7 3 1.42 0.23
 5 7 3 0.89 0.28
 -5 7 -3 1.33 0.28
 -6 -7 -3 0.56 0.23
 6 -7 3 0.77 0.25
 6 -7 3 0.79 0.22
 -6 7 -3 0.81 0.27
 6 7 3 1 0.33
 -7 -7 -3 0.86 0.29
 7 -7 3 0.66 0.22
 7 -7 3 0.55 0.24
 7 7 3 0.1 0.3
 -7 7 -3 0.6 0.25
 8 -7 3 14.14 0.76
 8 -7 3 16.07 0.78
 -8 -7 -3 15.99 0.85
 8 7 3 14.5 0.89
 9 -7 3 0.08 0.22
 9 -7 3 0.08 0.22
 9 7 3 0.09 0.32
 10 -7 3 36.91 1.41
 10 -7 3 33.1 1.32
 10 7 3 31.85 1.46
 11 -7 3 1.14 0.37
 11 -7 3 1.22 0.32
 11 7 3 0.86 0.43
 12 -7 3 39.44 1.53
 12 -7 3 38.82 1.65
 12 7 3 44.1 1.79
 13 -7 3 2.98 0.44
 13 -7 3 2.42 0.52
 13 7 3 3.7 0.62
 14 -7 3 27.22 1.37
 14 -7 3 25.27 1.19
 14 7 3 25.54 1.43
 16 -8 -3 10.4 0.99
 16 8 -3 9.21 1.01
 15 -8 -3 0.71 0.48
 15 8 -3 0.31 0.51
 15 8 -3 1.4 0.51
 14 -8 -3 31.54 1.52
 14 8 -3 31.86 1.49
 14 8 -3 28.45 1.55
 -14 8 3 33.22 1.58
 13 -8 -3 -0.05 0.18
 13 -8 -3 -0.15 0.32
 13 8 -3 0.09 0.4
 13 8 -3 -0.06 0.4
 -13 8 3 -0.14 0.35
 12 -8 -3 53.3 2.02
 12 -8 -3 52.6 1.7
 -12 8 3 51.49 2.09
 12 8 -3 54.09 2.06
 11 -8 -3 2.06 0.43
 11 -8 -3 2.35 0.3
 -11 8 3 1.62 0.45
 11 8 -3 2.08 0.51
 10 -8 -3 66.08 2.31
 10 -8 -3 66.01 2.09
 -10 8 3 67.5 2.44
 10 8 -3 67.78 2.41
 9 -8 -3 8.64 0.66
 9 -8 -3 9.47 0.58
 -9 8 3 9.07 0.78
 9 8 -3 10.13 0.85
 8 -8 -3 67.73 2.21
 8 -8 -3 68.61 2.3
 -8 -8 3 70.6 2.36
 -8 8 3 68.28 2.48
 8 8 -3 69.75 2.43
 -7 -8 3 2.11 0.4
 7 -8 -3 2.29 0.38
 7 -8 -3 2.7 0.39
 7 8 -3 3.81 0.57
 -7 8 3 1.98 0.37
 -7 8 3 3.42 0.57
 6 -8 -3 32.91 1.37
 6 -8 -3 30.64 1.28
 -6 -8 3 31.97 1.31
 -6 8 3 30.69 1.29
 6 8 -3 33.87 1.4
 -6 8 3 30.32 1.44
 -5 -8 3 1.53 0.34
 5 -8 -3 2.13 0.38
 5 -8 -3 2.07 0.37
 5 8 -3 1.58 0.4
 -5 8 3 2.2 0.49
 5 8 -3 1.85 0.27
 -5 8 3 2.63 0.45
 4 -8 -3 2.62 0.4
 4 -8 -3 2.25 0.34
 -4 -8 3 1.59 0.33
 -4 8 3 1.86 0.38
 4 8 -3 2.08 0.24
 4 8 -3 1.79 0.39
 3 -8 -3 1.73 0.28
 -3 -8 3 1.65 0.36
 3 -8 -3 0.96 0.29
 3 8 -3 1.61 0.4
 -3 8 3 1.28 0.35
 3 8 -3 1.7 0.21
 2 -8 -3 2.86 0.31
 -2 -8 3 2.57 0.39
 2 -8 -3 2.6 0.39
 -2 8 3 2.91 0.43
 2 8 -3 2.22 0.43
 2 8 -3 2.36 0.47
 1 -8 -3 3.11 0.42
 1 -8 -3 2.18 0.25
 -1 -8 3 2.34 0.36
 1 8 -3 1.81 0.41
 1 8 -3 1.96 0.37
 -1 8 3 2.85 0.42
 0 -8 3 28.37 1.18
 0 -8 -3 29.5 1.2
 0 8 -3 28.83 1.34
 0 8 -3 30.34 1.23
 0 8 3 30.6 1.25
 -1 -8 -3 2.96 0.39
 1 -8 3 2.85 0.4
 1 8 3 2.73 0.43
 -1 8 -3 4.2 0.54
 -1 8 -3 3.25 0.44
 2 -8 3 70.24 2.28
 -2 -8 -3 69.29 2.29
 -2 8 -3 70.69 2.42
 -2 8 -3 69.73 2.29
 2 8 3 70.49 2.33
 3 -8 3 3.49 0.26
 -3 -8 -3 3.29 0.43
 3 -8 3 3.48 0.42
 3 8 3 3.42 0.47
 -3 8 -3 4.11 0.52
 -3 8 -3 3.58 0.44
 4 -8 3 79.34 2.56
 -4 -8 -3 82.41 2.62
 4 -8 3 81.12 2.37
 4 8 3 80.12 2.65
 -4 8 -3 82.68 2.73
 -4 8 -3 80.26 2.58
 5 -8 3 3.15 0.32
 5 -8 3 3.32 0.42
 -5 -8 -3 4.25 0.5
 -5 8 -3 4 0.45
 -5 8 -3 3.57 0.51
 5 8 3 2.77 0.47
 6 -8 3 112.63 3.33
 6 -8 3 113.84 3.46
 -6 -8 -3 116.58 3.54
 -6 8 -3 111.16 3.45
 6 8 3 116.22 3.58
 -7 -8 -3 1.02 0.33
 7 -8 3 0.88 0.28
 7 -8 3 0.96 0.25
 7 8 3 1.83 0.45
 -7 8 -3 0.73 0.3
 8 -8 3 39.54 1.45
 8 -8 3 40.56 1.51
 -8 -8 -3 41.61 1.6
 8 8 3 37.73 1.62
 9 -8 3 1.73 0.36
 9 -8 3 1.54 0.34
 9 8 3 1.81 0.47
 10 -8 3 28.75 1.24
 10 -8 3 29.21 1.24
 10 8 3 31.19 1.46
 11 -8 3 1.99 0.43
 11 -8 3 2.4 0.42
 11 8 3 2.77 0.59
 12 -8 3 3.7 0.58
 12 -8 3 4.33 0.52
 12 8 3 3.77 0.66
 13 -8 3 1.73 0.41
 13 -8 3 1.57 0.46
 13 8 3 1.67 0.6
 14 -8 3 -0.47 0.29
 14 8 3 -0.3 0.53
 16 -9 -3 22.34 1.36
 16 9 -3 22.99 1.38
 16 9 -3 18.57 1.37
 15 -9 -3 1.23 0.5
 15 9 -3 1.56 0.57
 15 9 -3 0.65 0.52
 14 -9 -3 11.1 1.01
 14 9 -3 11.31 0.97
 -14 9 3 12.49 1.04
 14 9 -3 9.32 0.95
 13 -9 -3 0.92 0.45
 13 -9 -3 1.49 0.3
 13 9 -3 1.71 0.56
 -13 9 3 2.02 0.56
 12 -9 -3 4.3 0.43
 12 -9 -3 3.85 0.6
 12 9 -3 3.51 0.64
 -12 9 3 4.11 0.67
 11 -9 -3 0.99 0.28
 11 -9 -3 0.86 0.39
 -11 9 3 1.48 0.47
 11 9 -3 1.12 0.49
 10 -9 -3 4.77 0.47
 10 -9 -3 3.42 0.52
 -10 9 3 4.32 0.62
 10 9 -3 3.19 0.61
 9 -9 -3 0.77 0.34
 9 -9 -3 1.06 0.3
 -9 9 3 0.76 0.42
 9 9 -3 0.8 0.44
 8 -9 -3 17.98 0.91
 8 -9 -3 18.06 0.96
 -8 -9 3 20.08 1.02
 8 9 -3 16.55 1.07
 -8 9 3 17.7 1.13
 7 -9 -3 -0.01 0.26
 -7 -9 3 0.77 0.3
 7 9 -3 0.36 0.39
 -7 9 3 -0.74 0.33
 -7 9 3 -0.01 0.32
 6 -9 -3 66.07 2.26
 -6 -9 3 64.09 2.26
 -6 9 3 62.51 2.25
 6 9 -3 68.46 2.37
 -6 9 3 66.07 2.5
 5 -9 -3 0.29 0.26
 -5 -9 3 0.23 0.26
 5 -9 -3 -0.01 0.23
 5 9 -3 0.34 0.39
 -5 9 3 0.07 0.31
 -5 9 3 0.14 0.34
 4 -9 -3 111.8 3.29
 4 -9 -3 112.47 3.44
 -4 -9 3 105.13 3.42
 4 9 -3 105.25 3.47
 -4 9 3 110.79 3.47
 3 -9 -3 1.48 0.36
 3 -9 -3 0.78 0.22
 -3 -9 3 0.79 0.29
 3 9 -3 1.19 0.39
 3 9 -3 0.77 0.13
 -3 9 3 0.28 0.33
 2 -9 -3 121.22 3.9
 -2 -9 3 124.32 3.92
 2 -9 -3 127.18 3.65
 -2 9 3 127.66 3.96
 2 9 -3 131.74 3.54
 2 9 -3 125.74 3.96
 2 9 -3 138.43 4.24
 1 -9 -3 0.03 0.23
 -1 -9 3 0.24 0.26
 1 -9 -3 0.11 0.13
 1 9 -3 -0.25 0.29
 1 9 -3 0.17 0.34
 -1 9 3 -0.19 0.3
 0 -9 3 90.42 2.92
 0 -9 -3 92.91 2.94
 0 -9 -3 90.7 2.61
 0 9 -3 87.74 3.09
 0 9 -3 90.9 2.96
 0 9 3 93.43 2.99
 -1 -9 -3 0.56 0.27
 1 -9 3 0.13 0.24
 1 9 3 0.07 0.32
 -1 9 -3 0.32 0.3
 -1 9 -3 0.19 0.3
 2 -9 3 47.59 1.68
 -2 -9 -3 43.89 1.67
 2 9 3 44.97 1.73
 -2 9 -3 44.44 1.69
 -2 9 -3 41.73 1.76
 3 -9 3 2.36 0.4
 3 -9 3 1.51 0.21
 -3 -9 -3 2.26 0.41
 3 9 3 2.88 0.52
 -3 9 -3 1.88 0.4
 -3 9 -3 2.65 0.47
 -4 -9 -3 4.29 0.5
 4 -9 3 4.7 0.34
 4 -9 3 3.7 0.47
 -4 9 -3 4.53 0.61
 4 9 3 4.24 0.54
 -4 9 -3 4.46 0.53
 -5 -9 -3 0.15 0.24
 5 -9 3 0.47 0.21
 5 -9 3 0.66 0.28
 5 9 3 0.52 0.34
 -5 9 -3 0.35 0.34
 -5 9 -3 0.22 0.28
 6 -9 3 1.04 0.26
 6 -9 3 1.02 0.32
 -6 -9 -3 1.12 0.35
 6 9 3 1.33 0.44
 -6 9 -3 1.13 0.36
 -6 9 -3 1.06 0.39
 7 -9 3 3.04 0.43
 -7 -9 -3 3.51 0.5
 7 -9 3 3.24 0.39
 7 9 3 2.55 0.5
 -7 9 -3 2.92 0.55
 -7 9 -3 3.02 0.45
 8 -9 3 18.11 0.95
 -8 -9 -3 17.89 1.02
 8 -9 3 17.6 0.87
 -8 9 -3 21.19 1.21
 8 9 3 17.26 1.09
 9 -9 3 -0.26 0.34
 9 -9 3 0.46 0.3
 -9 9 -3 -0.06 0.35
 9 9 3 -0.14 0.39
 10 -9 3 34.23 1.43
 -10 9 -3 36.82 1.71
 10 9 3 33.07 1.64
 11 -9 3 0.23 0.31
 11 9 3 0.69 0.5
 12 -9 3 28.54 1.31
 12 9 3 34.48 1.66
 13 -9 3 1.66 0.43
 13 9 3 1.96 0.63
 15 -10 -3 -0.3 0.42
 15 10 -3 -0.06 0.49
 15 10 -3 -0.26 0.47
 14 -10 -3 40.37 1.79
 14 10 -3 36.78 1.83
 14 10 -3 40.55 1.86
 -14 10 3 39.44 1.96
 13 -10 -3 1.26 0.44
 13 -10 -3 0.34 0.27
 -13 10 3 -0.05 0.44
 13 10 -3 0.45 0.52
 12 -10 -3 76.03 2.6
 12 -10 -3 68.39 2.29
 -12 10 3 70.36 2.76
 12 10 -3 70.17 2.66
 11 -10 -3 1.9 0.37
 11 -10 -3 2.23 0.5
 11 10 -3 2.51 0.62
 -11 10 3 2.81 0.6
 10 -10 -3 97.19 3.16
 10 -10 -3 96.27 3.03
 -10 10 3 89.65 3.36
 10 10 -3 100.7 3.33
 9 -10 -3 4.91 0.55
 9 -10 -3 5.04 0.62
 9 10 -3 6.8 0.78
 -9 10 3 4.79 0.69
 -8 -10 3 63.48 2.25
 8 -10 -3 59.4 2.15
 8 10 -3 60.45 2.3
 -8 10 3 59.54 2.42
 7 -10 -3 3.07 0.49
 -7 -10 3 2.91 0.49
 -7 10 3 3.38 0.63
 7 10 -3 3.7 0.59
 -6 -10 3 31.41 1.37
 6 -10 -3 31.22 1.35
 -6 10 3 30.53 1.58
 6 10 -3 28.46 1.42
 -6 10 3 27.59 1.33
 5 -10 -3 6.52 0.65
 -5 -10 3 6.85 0.69
 5 10 -3 6.41 0.75
 -5 10 3 6.74 0.83
 -5 10 3 5.99 0.67
 4 -10 -3 15.75 0.92
 -4 -10 3 16.1 0.95
 -4 10 3 17.13 0.99
 4 10 -3 14.51 1.01
 3 -10 -3 1.35 0.25
 -3 -10 3 1.38 0.35
 3 -10 -3 0.77 0.31
 -3 10 3 1.3 0.42
 3 10 -3 1.05 0.44
 -2 -10 3 3.49 0.52
 2 -10 -3 4.7 0.56
 2 -10 -3 3.54 0.31
 -2 10 3 3.22 0.56
 2 10 -3 4.11 0.61
 -1 -10 3 3.03 0.48
 1 -10 -3 3.62 0.52
 1 10 -3 2.85 0.49
 -1 10 3 4.71 0.65
 1 10 -3 3.8 0.65
 0 -10 -3 42.38 1.7
 0 -10 3 42.87 1.69
 0 10 -3 41.58 1.87
 0 10 -3 45.01 1.76
 0 10 3 46.37 1.79
 -1 -10 -3 4.42 0.56
 1 -10 3 4.65 0.54
 -1 10 -3 4.85 0.71
 1 10 3 5.04 0.65
 -1 10 -3 2.72 0.47
 2 -10 3 56.83 2.07
 -2 -10 -3 57.39 2.09
 2 10 3 58.19 2.15
 -2 10 -3 59.39 2.13
 -2 10 -3 53.75 2.21
 3 -10 3 10.53 0.75
 -3 -10 -3 10.51 0.77
 -3 10 -3 12.01 0.93
 3 10 3 10.27 0.89
 -3 10 -3 10.25 0.8
 4 -10 3 94.66 3.12
 -4 -10 -3 94.92 3.15
 -4 10 -3 97.44 3.31
 4 10 3 99.1 3.23
 -4 10 -3 96.88 3.15
 -5 -10 -3 1.48 0.39
 5 -10 3 2.27 0.43
 -5 10 -3 1.51 0.4
 5 10 3 0.9 0.45
 -5 10 -3 1.9 0.49
 -6 -10 -3 68.64 2.4
 6 -10 3 67.81 2.33
 -6 10 -3 64.34 2.32
 6 10 3 66.76 2.45
 -6 10 -3 65.09 2.52
 7 -10 3 -0.09 0.28
 -7 -10 -3 0.14 0.32
 7 10 3 -0.31 0.35
 -7 10 -3 0.15 0.37
 -8 -10 -3 88.9 2.97
 8 -10 3 84.61 2.84
 8 10 3 81.37 3
 -8 10 -3 87.35 3.12
 9 -10 3 0.69 0.34
 9 10 3 0.46 0.48
 -9 10 -3 0.29 0.46
 10 -10 3 23.89 1.17
 -10 10 -3 22.94 1.43
 10 10 3 25.46 1.42
 11 -10 3 3.46 0.53
 -11 10 -3 3.42 0.75
 11 10 3 4.01 0.78
 12 -10 3 6.81 0.7
 -12 10 -3 8.21 1.03
 12 10 3 5.85 0.93
 13 -10 3 1.95 0.47
 -13 10 -3 2.1 0.69
 13 10 3 0.7 0.67
 15 -11 -3 0.4 0.47
 15 11 -3 0.22 0.52
 15 11 -3 0.85 0.58
 14 -11 -3 17.48 1.17
 -14 11 3 17.92 1.38
 14 11 -3 13.01 1.15
 14 11 -3 19.23 1.31
 13 -11 -3 3.51 0.63
 13 -11 -3 3.03 0.44
 13 11 -3 2.6 0.67
 -13 11 3 1.6 0.65
 12 -11 -3 3.76 0.64
 12 -11 -3 5.28 0.56
 12 11 -3 5.57 0.82
 -12 11 3 5.34 0.85
 11 -11 -3 0.68 0.42
 11 -11 -3 1.89 0.41
 -11 11 3 0.39 0.5
 11 11 -3 1.39 0.6
 10 -11 -3 2.21 0.44
 10 -11 -3 2.55 0.51
 10 11 -3 2.56 0.65
 -10 11 3 2.5 0.65
 9 -11 -3 -0.1 0.31
 -9 11 3 -0.21 0.41
 9 11 -3 0.18 0.45
 8 -11 -3 18.28 1.05
 -8 -11 3 19.02 1.08
 8 11 -3 20.3 1.21
 -8 11 3 18.1 1.29
 7 -11 -3 0.85 0.37
 -7 -11 3 1.49 0.43
 7 11 -3 1.09 0.5
 -7 11 3 1.11 0.51
 6 -11 -3 78.91 2.74
 -6 -11 3 79.92 2.76
 6 11 -3 77.82 2.82
 -6 11 3 78.87 2.76
 -6 11 3 81.09 3.03
 5 -11 -3 8.35 0.77
 -5 -11 3 5.83 0.67
 5 11 -3 6.55 0.76
 -5 11 3 7.12 0.75
 4 -11 -3 104.57 3.39
 -4 -11 3 100.76 3.4
 -4 11 3 108.03 3.45
 4 11 -3 103.54 3.49
 -3 -11 3 -0.3 0.23
 3 -11 -3 -0.35 0.26
 -3 11 3 0.28 0.4
 3 11 -3 0.51 0.4
 -2 -11 3 185.93 5.39
 2 -11 -3 171 5.3
 -2 11 3 173.8 5.37
 2 11 -3 177.65 5.42
 1 -11 -3 -0.19 0.26
 -1 -11 3 -0.26 0.26
 -1 11 3 0.42 0.41
 1 11 -3 -0.3 0.38
 1 11 -3 -0.13 0.43
 0 -11 3 107.2 3.47
 0 -11 -3 103.24 3.45
 0 11 -3 107.13 3.72
 0 11 3 105.98 3.52
 0 11 -3 107.24 3.52
 -1 -11 -3 0.75 0.36
 1 -11 3 0.69 0.37
 1 11 3 0.94 0.47
 -1 11 -3 0.17 0.4
 -1 11 -3 0.4 0.42
 -2 -11 -3 24.14 1.22
 2 -11 3 24.65 1.24
 -2 11 -3 27.06 1.34
 2 11 3 24.3 1.29
 -2 11 -3 24.02 1.38
 -3 -11 -3 0.4 0.3
 3 -11 3 0.28 0.29
 -3 11 -3 0.88 0.48
 -3 11 -3 0.33 0.35
 3 11 3 0.22 0.39
 4 -11 3 5.8 0.68
 -4 -11 -3 4.62 0.64
 4 11 3 5.33 0.72
 -4 11 -3 3.11 0.58
 -4 11 -3 3.4 0.62
 5 -11 3 3.57 0.55
 -5 -11 -3 2.11 0.47
 -5 11 -3 2.11 0.53
 5 11 3 3.19 0.63
 -5 11 -3 4.06 0.61
 -6 -11 -3 2.73 0.54
 6 -11 3 3.18 0.53
 -6 11 -3 3.26 0.56
 6 11 3 2.19 0.6
 -6 11 -3 2.26 0.58
 7 -11 3 4.01 0.58
 -7 -11 -3 3.78 0.62
 7 11 3 3.57 0.69
 -7 11 -3 2.44 0.59
 8 -11 3 26.22 1.27
 -8 -11 -3 26.37 1.37
 8 11 3 22.62 1.41
 -8 11 -3 25.29 1.46
 9 -11 3 1.73 0.47
 -9 11 -3 0.55 0.51
 9 11 3 0.98 0.57
 10 -11 3 28.76 1.38
 10 11 3 30.49 1.66
 -10 11 -3 27.67 1.63
 11 -11 3 0.72 0.41
 -11 11 -3 0.46 0.52
 11 11 3 0.53 0.62
 12 -11 3 46.29 1.92
 12 11 3 47.35 2.28
 -12 11 -3 53.02 2.36
 14 12 -3 28.36 1.6
 -14 12 3 26.84 1.78
 13 -12 -3 -0.28 0.31
 -13 12 3 0.64 0.6
 13 12 -3 0.01 0.55
 12 -12 -3 56.04 2.34
 12 -12 -3 56.17 2.08
 12 12 -3 56.25 2.36
 -12 12 3 57.99 2.56
 11 -12 -3 2.41 0.53
 11 -12 -3 2.84 0.52
 -11 12 3 2.86 0.71
 11 12 -3 2.55 0.67
 10 -12 -3 81.4 2.78
 -10 12 3 76.14 3.12
 10 12 -3 84.26 3
 9 -12 -3 2.97 0.52
 -9 12 3 2.53 0.68
 9 12 -3 3.53 0.7
 8 -12 -3 73.76 2.67
 -8 -12 3 78.23 2.72
 8 12 -3 72.7 2.77
 -8 12 3 74.56 2.97
 -7 -12 3 6.36 0.71
 7 -12 -3 5.95 0.7
 -7 12 3 3.56 0.73
 7 12 -3 4.66 0.73
 -6 -12 3 56.17 2.19
 6 -12 -3 55.93 2.18
 6 12 -3 58.06 2.3
 -5 -12 3 6.25 0.71
 5 -12 -3 5.69 0.69
 -5 12 3 6.26 0.77
 5 12 -3 6.19 0.77
 4 -12 -3 4.35 0.6
 -4 -12 3 3.59 0.58
 -4 12 3 3.98 0.65
 4 12 -3 3.27 0.67
 -3 -12 3 18.17 1.07
 3 -12 -3 16.02 0.97
 3 12 -3 17.1 1.16
 -3 12 3 15.58 1.03
 -2 -12 3 8.49 0.84
 2 -12 -3 7.75 0.76
 -2 12 3 6.67 0.79
 2 12 -3 7.27 0.87
 1 -12 -3 1.5 0.38
 -1 -12 3 1.42 0.41
 1 12 -3 1.43 0.53
 -1 12 3 1.45 0.46
 1 12 -3 1.61 0.5
 0 -12 -3 29.11 1.41
 0 -12 3 30.99 1.44
 0 12 -3 31.69 1.7
 0 12 -3 28.66 1.47
 0 12 3 29.95 1.51
 1 -12 3 26.03 1.31
 -1 -12 -3 24.86 1.29
 -1 12 -3 22.7 1.43
 1 12 3 25.62 1.4
 -1 12 -3 24.63 1.37
 -2 -12 -3 102.56 3.33
 2 -12 3 98.61 3.29
 -2 12 -3 93.74 3.31
 2 12 3 95.66 3.35
 -2 12 -3 94.59 3.49
 3 -12 3 3.24 0.53
 -3 -12 -3 3.89 0.6
 -3 12 -3 2.65 0.54
 -3 12 -3 2.62 0.63
 3 12 3 4.75 0.73
 -4 -12 -3 97.04 3.4
 4 -12 3 104.13 3.42
 -4 12 -3 95.38 3.59
 -4 12 -3 105.72 3.47
 4 12 3 101.5 3.49
 -5 -12 -3 2.35 0.5
 5 -12 3 2.51 0.53
 5 12 3 2.97 0.64
 -5 12 -3 2.91 0.65
 -5 12 -3 1.58 0.52
 -6 -12 -3 100.92 3.49
 6 -12 3 105.15 3.46
 6 12 3 96.74 3.53
 -6 12 -3 103.56 3.7
 -6 12 -3 102.74 3.46
 7 -12 3 0.53 0.39
 -7 -12 -3 -0.09 0.37
 -7 12 -3 0.53 0.47
 7 12 3 -0.92 0.42
 -8 -12 -3 49.35 2.06
 8 -12 3 46.52 1.93
 8 12 3 46.69 2.13
 -8 12 -3 43.79 2.16
 9 -12 3 0.65 0.44
 9 12 3 -0.16 0.56
 -9 12 -3 1.49 0.62
 10 -12 3 24.7 1.34
 10 12 3 24.19 1.57
 -10 12 -3 24.27 1.59
 11 -12 3 3.66 0.61
 -11 12 -3 2.98 0.76
 11 12 3 2.74 0.82
 13 -13 -3 2.3 0.5
 13 13 -3 2.56 0.73
 -13 13 3 4.37 0.94
 12 -13 -3 2.73 0.53
 -12 13 3 1.81 0.72
 12 13 -3 1.56 0.67
 11 -13 -3 4.2 0.63
 11 13 -3 3.94 0.79
 -11 13 3 2.99 0.77
 10 -13 -3 0.54 0.43
 10 13 -3 0.46 0.56
 -10 13 3 0.98 0.63
 9 -13 -3 3.27 0.62
 -9 13 3 4.04 0.88
 9 13 -3 3.74 0.72
 -8 -13 3 24.89 1.34
 8 -13 -3 21.76 1.29
 8 13 -3 25.67 1.47
 -8 13 3 24.57 1.54
 -7 -13 3 0.85 0.42
 7 -13 -3 0.42 0.4
 -7 13 3 1.28 0.59
 7 13 -3 1.48 0.58
 6 -13 -3 106.37 3.62
 -6 -13 3 113.37 3.67
 6 13 -3 105.57 3.71
 -5 -13 3 0.58 0.4
 5 -13 -3 1.01 0.42
 -5 13 3 3.05 0.62
 5 13 -3 0.51 0.53
 4 -13 -3 128.61 4.12
 -4 -13 3 123.99 4.11
 4 13 -3 132.62 4.24
 -4 13 3 122.91 4.13
 3 -13 -3 0.99 0.39
 -3 -13 3 0.72 0.36
 3 13 -3 0.02 0.47
 -3 13 3 0.9 0.48
 2 -13 -3 127.96 4.13
 -2 -13 3 127.33 4.16
 2 13 -3 131.78 4.28
 -2 13 3 128.67 4.21
 1 -13 -3 0.78 0.35
 -1 -13 3 1.18 0.42
 1 13 -3 0.6 0.45
 -1 13 3 0.69 0.44
 0 -13 3 66.32 2.5
 0 -13 -3 67.73 2.47
 0 13 -3 64.93 2.75
 0 13 -3 65.24 2.58
 0 13 3 64.97 2.53
 -1 -13 -3 0.37 0.33
 1 -13 3 0.54 0.43
 -1 13 -3 -0.18 0.51
 -1 13 -3 0.1 0.49
 1 13 3 0.29 0.45
 2 -13 3 53.96 2.16
 -2 -13 -3 56.56 2.2
 -2 13 -3 50.92 2.19
 2 13 3 55.04 2.27
 -2 13 -3 50.72 2.36
 3 -13 3 1.16 0.46
 -3 -13 -3 0.88 0.41
 3 13 3 0.71 0.5
 -3 13 -3 1.67 0.59
 -3 13 -3 1.35 0.63
 4 -13 3 5.21 0.72
 -4 -13 -3 2.9 0.59
 4 13 3 1.6 0.6
 -4 13 -3 3.33 0.73
 -4 13 -3 2.72 0.66
 5 -13 3 2.86 0.59
 -5 -13 -3 1.79 0.51
 -5 13 -3 2.2 0.7
 -5 13 -3 3.96 0.71
 5 13 3 2.59 0.64
 -6 -13 -3 2.74 0.61
 6 -13 3 1.68 0.51
 6 13 3 2.9 0.71
 -6 13 -3 2.14 0.68
 -7 -13 -3 3.26 0.64
 7 -13 3 3.57 0.66
 7 13 3 2.89 0.75
 -7 13 -3 3.95 0.84
 -8 -13 -3 15.92 1.19
 8 -13 3 16.03 1.12
 8 13 3 14.47 1.36
 -8 13 -3 15.5 1.41
 9 -13 3 1.93 0.56
 9 13 3 2.36 0.77
 -9 13 -3 1.68 0.71
 10 -13 3 25.23 1.46
 -10 13 -3 27.35 1.78
 10 13 3 28.76 1.77
 12 -14 -3 57.98 2.26
 12 14 -3 60 2.5
 -12 14 3 52.53 2.65
 11 -14 -3 2.72 0.58
 -11 14 3 1.73 0.78
 11 14 -3 3.38 0.77
 10 -14 -3 63.48 2.52
 10 14 -3 68.34 2.74
 -10 14 3 68.29 2.94
 9 -14 -3 4.3 0.68
 9 14 -3 5.26 0.86
 -9 14 3 4.52 0.93
 8 -14 -3 90.12 3.2
 -8 14 3 87.81 3.51
 8 14 -3 91.73 3.32
 7 -14 -3 7.8 0.87
 -7 -14 3 8.03 0.83
 7 14 -3 7.8 0.95
 6 -14 -3 58.01 2.23
 -6 -14 3 52.97 2.2
 6 14 -3 52.04 2.29
 5 -14 -3 7.07 0.79
 -5 -14 3 11.5 1.03
 -5 14 3 9.85 0.96
 5 14 -3 8.95 1
 -4 -14 3 12.27 0.97
 4 -14 -3 13.06 0.93
 4 14 -3 10.51 1.05
 -4 14 3 10.42 0.99
 -3 -14 3 3.23 0.62
 3 -14 -3 3.93 0.63
 -3 14 3 4.1 0.74
 3 14 -3 5.16 0.83
 -2 -14 3 4.58 0.67
 2 -14 -3 4.67 0.67
 -2 14 3 4.01 0.72
 2 14 -3 3.74 0.71
 1 -14 -3 19.85 1.16
 -1 -14 3 18.74 1.2
 1 14 -3 20.59 1.34
 -1 14 3 20.21 1.31
 0 -14 -3 31.17 1.55
 0 -14 3 33.02 1.63
 0 14 3 32.61 1.68
 0 14 -3 34.81 1.76
 1 -14 3 4.07 0.68
 -1 -14 -3 3.9 0.64
 -1 14 -3 3.89 0.73
 -1 14 -3 5.31 0.99
 1 14 3 4.67 0.77
 -2 -14 -3 89.41 3.15
 2 -14 3 83.31 3.14
 2 14 3 90.37 3.25
 -2 14 -3 92.65 3.51
 -2 14 -3 84.26 3.23
 -3 -14 -3 8.43 0.91
 3 -14 3 7.59 0.89
 -3 14 -3 10.06 1.07
 3 14 3 7.72 1
 -3 14 -3 7.83 1.06
 -4 -14 -3 102.07 3.5
 4 -14 3 92.79 3.43
 -4 14 -3 95.79 3.51
 4 14 3 99.64 3.58
 -4 14 -3 99.01 3.75
 5 -14 3 4.73 0.72
 -5 -14 -3 4.97 0.77
 -5 14 -3 4.11 0.76
 5 14 3 4.6 0.85
 -5 14 -3 5.88 1
 6 -14 3 67.29 2.67
 -6 -14 -3 68.37 2.71
 -6 14 -3 70.78 3.01
 6 14 3 64.71 2.79
 7 -14 3 -0.4 0.4
 -7 -14 -3 -0.1 0.46
 -7 14 -3 0.07 0.58
 7 14 3 -0.09 0.58
 -8 -14 -3 42.15 2.8
 8 -14 3 41.28 1.91
 8 14 3 35.54 2.01
 -8 14 -3 36.26 2.12
 9 -14 3 0.28 0.5
 -9 14 -3 0.63 0.65
 9 14 3 0.32 0.67
 11 -15 -3 3.04 0.67
 -11 15 3 5.45 1.05
 11 15 -3 4.13 0.86
 10 -15 -3 2.46 0.63
 -10 15 3 1.65 0.73
 10 15 -3 1.87 0.72
 9 -15 -3 0.6 0.48
 9 15 -3 1.05 0.65
 8 -15 -3 21.51 1.35
 8 15 -3 21.5 1.47
 -7 -15 3 0.58 0.43
 7 -15 -3 0.41 0.45
 7 15 -3 1.38 0.63
 6 -15 -3 81.4 2.99
 -6 -15 3 81.17 3
 6 15 -3 82.64 3.12
 5 -15 -3 0.77 0.46
 -5 -15 3 1.55 0.51
 5 15 -3 1.71 0.66
 4 -15 -3 128.93 4.32
 -4 -15 3 131.12 4.36
 4 15 -3 132.99 4.46
 -4 15 3 135.66 4.41
 3 -15 -3 0.42 0.4
 -3 -15 3 0.92 0.47
 -3 15 3 0.25 0.49
 3 15 -3 -0.2 0.54
 2 -15 -3 142.09 4.59
 -2 -15 3 138.51 4.61
 2 15 -3 145.66 4.76
 -2 15 3 143.29 4.67
 -1 -15 3 0.48 0.43
 1 -15 -3 0.81 0.46
 -1 15 3 1.19 0.58
 1 15 -3 1.44 0.65
 0 -15 -3 112.23 3.81
 0 -15 3 116.05 3.9
 0 15 -3 115.45 3.98
 0 15 3 107.07 3.88
 -1 -15 -3 1.57 0.51
 1 -15 3 0.46 0.44
 -1 15 -3 0.72 0.67
 -1 15 -3 0.53 0.51
 1 15 3 1.08 0.6
 2 -15 3 26.08 1.48
 -2 -15 -3 27.07 1.45
 -2 15 -3 24.94 1.58
 -2 15 -3 26.7 1.72
 2 15 3 23.54 1.53
 -3 -15 -3 5.06 0.7
 3 -15 3 3.81 0.7
 -3 15 -3 5.26 0.87
 -3 15 -3 4.15 0.95
 3 15 3 4.3 0.77
 -4 -15 -3 2.87 0.62
 4 -15 3 2.83 0.65
 -4 15 -3 4.68 0.97
 4 15 3 3 0.71
 -4 15 -3 3.83 0.79
 5 -15 3 2.36 0.66
 -5 -15 -3 3.77 0.71
 5 15 3 2.38 0.76
 -5 15 -3 2.11 0.8
 6 -15 3 0.73 0.53
 -6 -15 -3 0.7 0.47
 6 15 3 0.43 0.56
 -6 15 -3 1.75 0.81
 -7 -15 -3 3.02 0.68
 7 -15 3 3.79 0.74
 7 15 3 2.14 0.76
 -7 15 -3 4.82 1.02
 8 -15 3 13.91 1.26
 8 15 3 13.63 1.4
 -8 15 -3 13.58 1.54
 10 -16 -3 64.02 2.59
 10 16 -3 63.21 2.72
 9 -16 -3 5.99 0.83
 9 16 -3 6.94 1.02
 8 -16 -3 52.1 2.21
 8 16 -3 47.17 2.28
 7 -16 -3 5.82 0.81
 -7 -16 3 5.35 0.76
 7 16 -3 5.88 0.91
 -6 -16 3 40.09 1.88
 6 -16 -3 39.17 1.86
 6 16 -3 37.87 1.99
 5 -16 -3 9.03 0.92
 -5 -16 3 6.73 0.82
 5 16 -3 7.48 0.95
 -4 -16 3 10.6 1.05
 4 -16 -3 8.74 0.95
 -4 16 3 8.13 1.01
 4 16 -3 9.07 1.1
 -3 -16 3 14.08 1.1
 3 -16 -3 13.31 1.06
 -3 16 3 14.57 1.26
 3 16 -3 13.98 1.27
 -2 -16 3 3.62 0.7
 2 -16 -3 3.6 0.67
 2 16 -3 5.36 0.87
 -2 16 3 5.49 0.85
 -1 -16 3 10.48 1.02
 1 -16 -3 9.55 0.93
 -1 16 3 8.64 0.99
 1 16 -3 8.91 1.04
 0 -16 3 37.44 1.78
 0 -16 -3 36.56 1.75
 0 16 3 35.29 1.85
 0 16 -3 31.97 1.8
 -1 -16 -3 9.93 1.02
 1 -16 3 10.01 1.02
 -1 16 -3 8.27 1.04
 1 16 3 7.93 1.03
 2 -16 3 79.77 2.96
 -2 -16 -3 73.26 2.85
 2 16 3 75.67 3
 -2 16 -3 72.26 3
 -2 16 -3 71.28 3.17
 3 -16 3 2.29 0.67
 -3 -16 -3 1.15 0.52
 -3 16 -3 2.21 0.77
 3 16 3 3.03 0.77
 -3 16 -3 3.26 0.86
 4 -16 3 80.24 3.05
 -4 -16 -3 76.77 2.95
 4 16 3 69.44 3
 -4 16 -3 74.39 3.07
 -4 16 -3 79.51 3.4
 -5 -16 -3 5.45 0.86
 5 -16 3 3.71 0.76
 -5 16 -3 4.64 0.98
 5 16 3 4.06 0.9
 -6 -16 -3 53.98 2.34
 6 -16 3 45.78 2.28
 6 16 3 52.16 2.44
 -6 16 -3 49.65 2.68
 7 -16 3 -0.03 0.55
 -7 -16 -3 -0.58 0.48
 7 16 3 0.27 0.69
 -7 16 -3 -0.19 0.69
 8 -17 -3 20.36 1.38
 8 17 -3 14.01 1.32
 7 -17 -3 2.41 0.65
 -7 -17 3 2.79 0.65
 7 17 -3 2.68 0.82
 -6 -17 3 65.55 2.59
 6 -17 -3 61.25 2.53
 6 17 -3 59.15 2.64
 -5 -17 3 1.63 0.57
 5 -17 -3 1.32 0.53
 5 17 -3 2.66 0.77
 -4 -17 3 110.96 3.9
 4 -17 -3 115.62 3.91
 4 17 -3 109.06 4.01
 3 -17 -3 1 0.51
 -3 -17 3 0.14 0.46
 -3 17 3 1.06 0.64
 3 17 -3 1.3 0.68
 2 -17 -3 85.95 3.23
 -2 -17 3 92.27 3.32
 2 17 -3 92.28 3.43
 -2 17 3 84.13 3.3
 1 -17 -3 0.83 0.5
 -1 -17 3 0.26 0.42
 -1 17 3 0.99 0.64
 1 17 -3 1.67 0.74
 0 -17 3 64.42 2.71
 0 -17 -3 67.06 2.67
 0 17 -3 68.75 2.86
 0 17 3 70.09 2.81
 1 -17 3 2.2 0.65
 -1 -17 -3 2.21 0.61
 -1 17 -3 0.89 0.7
 1 17 3 2.15 0.68
 2 -17 3 29.21 1.68
 -2 -17 -3 32.78 1.71
 -2 17 -3 30.76 1.85
 2 17 3 29.63 1.81
 -3 -17 -3 2.31 0.66
 3 -17 3 1.5 0.64
 -3 17 -3 2.78 0.95
 3 17 3 1.87 0.76
 -3 17 -3 1.6 0.73
 -4 -17 -3 3.9 0.76
 4 -17 3 2.83 0.69
 -4 17 -3 3.22 0.97
 -4 17 -3 2.25 1.04
 4 17 3 3.32 0.84
 -5 -17 -3 3.95 0.8
 5 -17 3 5.57 0.88
 -5 17 -3 5.52 1.21
 5 17 3 4.78 0.97
 -5 -18 3 10.13 1.05
 5 -18 -3 9.18 0.99
 5 18 -3 10.25 1.18
 4 -18 -3 2.77 0.64
 -4 -18 3 4.17 0.72
 4 18 -3 2.69 0.77
 3 -18 -3 12.65 1.15
 -3 -18 3 10.21 1.1
 3 18 -3 9.7 1.16
 -3 18 3 12.7 1.3
 2 -18 -3 1.68 0.58
 -2 -18 3 1.27 0.6
 -2 18 3 1.72 0.72
 2 18 -3 0.77 0.7
 -1 -18 3 11.4 1.17
 1 -18 -3 12.72 1.15
 1 18 -3 17.36 1.49
 -1 18 3 9.78 1.09
 0 -18 -3 32.45 1.76
 0 -18 3 33.53 1.8
 0 18 3 33.74 1.91
 1 -18 3 6.12 0.85
 -1 -18 -3 5.26 0.81
 -1 18 -3 7.2 1.05
 1 18 3 6.25 1
 2 -18 3 43.1 2.13
 -2 -18 -3 46.43 2.16
 -2 18 -3 46.22 2.28
 2 18 3 47.42 2.31
 3 -18 3 4.55 0.83
 -3 -18 -3 4.98 0.84
 -3 18 -3 6.7 1.06
 3 18 3 4 0.9
 18 0 -4 0.99 0.55
 17 0 -4 -0.28 0.47
 16 0 -4 16.73 1.17
 15 0 -4 0.13 0.41
 14 0 -4 90.61 3.1
 13 0 -4 0.03 0.28
 12 0 -4 279.11 7.98
 11 0 -4 0.48 0.53
 11 0 -4 0.75 0.29
 10 0 -4 405.54 10.61
 10 0 -4 357.27 11.06
 9 0 -4 0.67 0.24
 9 0 -4 -0.12 0.35
 8 0 -4 340.51 9.07
 8 0 -4 315.3 9.49
 7 0 -4 -0.1 0.15
 7 0 -4 0.06 0.28
 6 0 -4 153.21 4.2
 6 0 -4 141.73 4.55
 5 0 -4 0.11 0.05
 5 0 -4 -0.22 0.23
 5 0 -4 -0.1 0.13
 4 0 -4 161.11 4.5
 4 0 -4 168.11 4.32
 4 0 -4 152 4.77
 3 0 -4 0.24 0.13
 3 0 -4 0.16 0.07
 2 0 -4 37.67 1.1
 -2 0 4 37.18 1.09
 -1 0 4 0.28 0.09
 1 0 -4 0.11 0.09
 0 0 4 12.3 0.47
 0 0 -4 13.2 0.48
 -1 0 -4 0.06 0.09
 1 0 4 0.16 0.09
 2 0 4 48.89 1.49
 -2 0 -4 49.53 1.49
 -3 0 -4 0 0.11
 3 0 4 -0.01 0.11
 -4 0 -4 64.15 1.91
 4 0 4 62.32 1.91
 -5 0 -4 0.09 0.12
 5 0 4 -0.2 0.12
 6 0 4 207.57 5.81
 -6 0 -4 209.03 5.8
 -7 0 -4 0.05 0.15
 7 0 4 0.03 0.17
 -8 0 -4 196.36 5.56
 8 0 4 197.83 5.57
 9 0 4 0 0.2
 10 0 4 173.42 5.01
 11 0 4 0.15 0.25
 12 0 4 53.77 1.9
 13 0 4 0 0.29
 14 0 4 15.57 0.93
 15 0 4 0.38 0.35
 18 -1 -4 94.35 3.49
 18 1 -4 94.44 3.52
 17 -1 -4 -0.11 0.48
 17 1 -4 0.58 0.54
 16 -1 -4 158.25 4.97
 16 1 -4 153.27 4.98
 15 -1 -4 1.06 0.43
 15 1 -4 0.39 0.46
 14 -1 -4 125.62 3.98
 14 1 -4 122.21 3.99
 13 -1 -4 1.67 0.42
 13 1 -4 2.13 0.48
 12 -1 -4 100.46 3.23
 12 1 -4 101.39 3.26
 11 -1 -4 0.29 0.27
 11 -1 -4 0.84 0.58
 11 1 -4 0.41 0.51
 11 1 -4 0.7 0.31
 10 -1 -4 4.8 0.5
 10 -1 -4 3.71 0.69
 10 1 -4 4.27 0.77
 10 1 -4 4.58 0.21
 10 1 -4 3.86 0.45
 9 -1 -4 0.04 0.36
 9 -1 -4 0.18 0.2
 9 1 -4 0.16 0.37
 9 1 -4 0.2 0.05
 9 1 -4 0.16 0.21
 8 -1 -4 14.07 0.99
 8 -1 -4 13.33 0.68
 8 1 -4 14.75 0.44
 8 1 -4 14.47 0.71
 8 1 -4 15.04 0.44
 7 -1 -4 7.77 0.47
 7 -1 -4 8.4 0.83
 7 1 -4 6.8 0.72
 7 1 -4 7.54 0.47
 7 1 -4 7.66 0.26
 6 -1 -4 142.66 4.07
 6 -1 -4 134.51 4.39
 6 1 -4 146.47 4.05
 6 1 -4 131.04 4.38
 -6 1 4 147.03 3.89
 6 1 -4 148.85 3.83
 5 -1 -4 6.02 0.21
 5 -1 -4 6.31 0.63
 5 -1 -4 6.5 0.41
 5 1 -4 5.66 0.35
 -5 1 4 4.81 0.28
 5 1 -4 6.65 0.24
 5 1 -4 4.53 0.55
 4 -1 -4 113.59 3.3
 4 -1 -4 109.54 3.19
 4 -1 -4 112.79 3.56
 4 -1 -4 120.71 3.11
 4 1 -4 106.57 3.55
 4 1 -4 114.51 3.26
 4 1 -4 122.95 3.12
 3 -1 -4 231.03 6.16
 -3 -1 4 238.38 6.17
 3 1 -4 234.08 6.17
 3 1 -4 213.33 6.27
 -2 -1 4 512.11 13.81
 2 -1 -4 494.26 13.61
 2 1 -4 509.19 13.76
 -2 1 4 501.64 13.7
 -1 -1 4 125.91 3.45
 1 -1 -4 125.46 3.45
 -1 1 4 122.36 3.44
 1 1 -4 126.98 3.45
 0 -1 4 144.55 4.03
 0 -1 -4 144.37 4.03
 0 1 -4 149.19 4.04
 0 1 4 147.65 4.03
 1 -1 4 1.77 0.19
 -1 -1 -4 2.24 0.22
 -1 1 -4 1.77 0.19
 1 1 4 3.29 0.25
 2 -1 4 125.87 3.58
 -2 -1 -4 128.24 3.59
 -2 1 -4 130.68 3.59
 2 1 4 127.74 3.59
 3 -1 4 1.02 0.16
 -3 -1 -4 1.27 0.18
 -3 1 -4 1.26 0.19
 3 1 4 0.78 0.16
 4 -1 4 47.6 1.47
 -4 -1 -4 46.77 1.47
 4 1 4 46.86 1.48
 -4 1 -4 45.29 1.46
 5 -1 4 0.27 0.15
 -5 -1 -4 0.15 0.14
 -5 1 -4 0.26 0.14
 5 1 4 0.12 0.16
 -6 -1 -4 17.49 0.75
 6 -1 4 19.65 0.77
 6 1 4 18.44 0.77
 -6 1 -4 17.98 0.75
 7 -1 4 0.82 0.22
 -7 -1 -4 1.54 0.26
 7 1 4 1.79 0.29
 -7 1 -4 1.78 0.26
 -8 -1 -4 6.39 0.46
 8 -1 4 6.7 0.49
 8 1 4 6.05 0.48
 -8 1 -4 7.55 0.48
 9 -1 4 1.02 0.26
 9 1 4 0.98 0.28
 10 -1 4 27.21 1.11
 10 1 4 27.17 1.12
 11 -1 4 1.34 0.33
 11 1 4 0.81 0.31
 12 -1 4 95.44 3.05
 12 1 4 99.19 3.09
 13 -1 4 2.03 0.41
 13 1 4 2 0.42
 14 -1 4 98.65 3.1
 14 1 4 93.02 3.08
 15 -1 4 0.01 0.49
 15 -1 4 0.3 0.36
 15 1 4 0.33 0.37
 18 -2 -4 1.8 0.6
 18 2 -4 1.73 0.67
 17 -2 -4 0.33 0.51
 17 2 -4 0.29 0.52
 16 -2 -4 18.39 1.21
 16 2 -4 15.74 1.2
 15 -2 -4 3.13 0.61
 15 2 -4 2.53 0.59
 14 -2 -4 62.81 2.36
 14 2 -4 67.46 2.45
 13 -2 -4 2.01 0.42
 13 2 -4 1.67 0.42
 12 -2 -4 259.22 7.45
 12 2 -4 264.14 7.48
 12 2 -4 255.96 7.05
 11 -2 -4 0.07 0.22
 11 -2 -4 1.02 0.51
 11 2 -4 0.4 0.52
 11 2 -4 -0.24 0.15
 11 2 -4 -0.22 0.24
 10 -2 -4 288.03 8.04
 10 -2 -4 275.5 8.56
 10 2 -4 288.48 7.73
 10 2 -4 294.06 8.06
 10 2 -4 282.64 8.51
 9 -2 -4 1.78 0.33
 9 -2 -4 1.81 0.51
 9 2 -4 2.12 0.2
 9 2 -4 1.73 0.32
 9 2 -4 1.4 0.47
 8 -2 -4 317.35 9.44
 8 -2 -4 318.99 8.99
 8 2 -4 329.39 8.98
 8 2 -4 340.18 8.75
 8 2 -4 319.63 9.39
 7 -2 -4 20.49 1.12
 7 -2 -4 17.41 0.79
 7 2 -4 18.59 0.61
 -7 2 4 18.89 0.68
 7 2 -4 19.14 1.09
 7 2 -4 18.59 0.78
 6 -2 -4 231.87 6.2
 6 -2 -4 222.55 6.77
 6 -2 -4 231.56 6.45
 6 2 -4 235.34 6.23
 6 2 -4 218.54 6.73
 6 2 -4 235.71 6.4
 -6 2 4 242.19 6.34
 5 -2 -4 10.16 0.72
 5 -2 -4 11.22 0.38
 5 -2 -4 9.74 0.52
 5 2 -4 11.68 0.5
 5 2 -4 10.68 0.39
 5 2 -4 10.97 0.75
 -5 2 4 9.24 0.49
 4 -2 -4 83.08 2.3
 4 -2 -4 83.75 2.72
 4 -2 -4 80.44 2.49
 -4 -2 4 86.04 2.32
 4 2 -4 86.01 2.32
 4 2 -4 77.24 2.7
 4 2 -4 84.87 2.41
 -3 -2 4 0.8 0.11
 3 -2 -4 0.63 0.1
 3 2 -4 0.59 0.11
 3 2 -4 0.8 0.13
 3 2 -4 1.05 0.18
 -3 2 4 0.88 0.12
 -2 -2 4 12.48 0.46
 -2 2 4 12.57 0.47
 2 2 -4 12.33 0.47
 1 -2 -4 10.86 0.44
 -1 -2 4 11.4 0.44
 1 2 -4 11.18 0.45
 -1 2 4 11.66 0.45
 0 -2 -4 4.11 0.26
 0 -2 4 4.01 0.26
 0 2 -4 4.2 0.27
 0 2 4 4.31 0.28
 1 -2 4 3.74 0.26
 -1 -2 -4 3.74 0.26
 1 2 4 4.06 0.27
 -1 2 -4 4.16 0.28
 2 -2 4 103.2 2.95
 -2 -2 -4 103.52 2.96
 2 2 4 104.05 2.97
 -2 2 -4 103.83 2.96
 -3 -2 -4 11.1 0.49
 3 -2 4 10.04 0.48
 -3 2 -4 10.29 0.49
 3 2 4 10.91 0.5
 4 -2 4 124.57 3.6
 -4 -2 -4 127.06 3.62
 -4 2 -4 129.71 3.62
 4 2 4 126.57 3.63
 -5 -2 -4 1.12 0.21
 5 -2 4 0.77 0.18
 -5 2 -4 0.96 0.19
 5 2 4 1.2 0.22
 -6 -2 -4 212.85 5.93
 6 -2 4 207.82 5.91
 -6 2 -4 212.46 5.91
 6 2 4 215.81 5.95
 -7 -2 -4 0.07 0.16
 7 -2 4 0.17 0.17
 -7 2 -4 0.01 0.15
 7 2 4 0.14 0.2
 8 -2 4 232.41 6.67
 8 2 4 242.03 6.72
 -8 2 -4 242.51 6.68
 9 -2 4 7.83 0.54
 9 2 4 7.78 0.56
 10 -2 4 107.8 3.3
 10 2 4 111 3.36
 11 -2 4 0.02 0.23
 11 2 4 0.15 0.27
 12 -2 4 62.95 2.12
 12 2 4 61.39 2.15
 13 -2 4 0.37 0.31
 13 2 4 0.47 0.35
 14 -2 4 13.86 0.87
 14 -2 4 14.43 1.2
 14 2 4 12.81 0.9
 15 -2 4 -0.25 0.31
 15 -2 4 -0.04 0.44
 15 2 4 0.15 0.38
 18 -3 -4 90.67 3.38
 18 3 -4 92.2 3.47
 17 -3 -4 -0.3 0.4
 17 3 -4 0.59 0.51
 16 -3 -4 125.91 4.18
 16 3 -4 129.16 4.27
 15 -3 -4 0.11 0.38
 15 3 -4 0.29 0.43
 14 -3 -4 111.5 3.62
 14 3 -4 109.63 3.66
 13 -3 -4 12.48 0.84
 13 3 -4 12.56 0.9
 13 3 -4 11 0.6
 12 -3 -4 40.56 1.66
 12 3 -4 43.95 1.44
 12 3 -4 47.68 1.76
 11 -3 -4 0.97 0.54
 11 -3 -4 1.49 0.35
 11 3 -4 0.98 0.25
 11 3 -4 1.72 0.4
 10 -3 -4 8.48 0.95
 10 -3 -4 10.18 0.65
 10 3 -4 8.48 0.92
 10 3 -4 9.51 0.51
 10 3 -4 9.2 0.63
 9 -3 -4 0.67 0.46
 9 -3 -4 1.69 0.33
 -9 3 4 1.21 0.23
 9 3 -4 1.88 0.33
 9 3 -4 1.06 0.46
 9 3 -4 1.37 0.23
 8 -3 -4 13.29 0.7
 8 -3 -4 14.32 1
 8 -3 -4 14.7 0.44
 8 3 -4 14.82 0.71
 -8 3 4 14.28 0.63
 8 3 -4 14.56 0.6
 8 3 -4 14.88 0.98
 7 -3 -4 1.33 0.26
 7 -3 -4 1.84 0.14
 7 -3 -4 1.75 0.43
 7 3 -4 1.17 0.36
 -7 3 4 2.13 0.27
 7 3 -4 2.3 0.29
 7 3 -4 1.7 0.21
 -6 -3 4 120.1 3.27
 6 -3 -4 107.87 3.2
 6 -3 -4 118.49 3.41
 6 -3 -4 117.59 3.71
 -6 3 4 114.39 3.36
 6 3 -4 116.86 3.23
 6 3 -4 112.45 3.64
 6 3 -4 116.86 3.32
 5 -3 -4 4.77 0.29
 5 -3 -4 5.64 0.41
 5 -3 -4 5.48 0.6
 -5 -3 4 5.07 0.27
 5 3 -4 4.92 0.55
 -5 3 4 4.75 0.4
 5 3 -4 5.21 0.33
 5 3 -4 4.7 0.28
 4 -3 -4 152.44 4.45
 4 -3 -4 157.84 4.28
 4 -3 -4 159.26 4.66
 -4 -3 4 156.64 4.29
 4 3 -4 158.56 4.3
 4 3 -4 153.82 4.65
 4 3 -4 155.26 4.32
 -3 -3 4 0.1 0.09
 3 -3 -4 0.08 0.08
 3 3 -4 0 0.09
 3 3 -4 0.22 0.12
 3 3 -4 0.02 0.14
 -3 3 4 0.11 0.1
 2 -3 -4 151.16 4.22
 -2 -3 4 151.87 4.22
 -2 3 4 155.63 4.23
 2 3 -4 153.94 4.23
 2 3 -4 154.29 4.26
 -1 -3 4 2.2 0.22
 1 -3 -4 2.05 0.19
 -1 3 4 2.31 0.21
 1 3 -4 3.11 0.25
 0 -3 -4 144.27 4.04
 0 -3 4 143.55 4.03
 0 3 4 145.84 4.05
 0 3 -4 147.44 4.05
 1 -3 4 7.04 0.36
 -1 3 -4 7.29 0.38
 1 3 4 6.52 0.38
 2 -3 4 131.3 3.78
 2 3 4 136.73 3.81
 -2 3 -4 134.95 3.79
 3 -3 4 2.14 0.25
 -3 3 -4 1.91 0.23
 3 3 4 2.68 0.28
 4 -3 4 111.01 3.23
 -4 3 -4 114.28 3.25
 4 3 4 111.47 3.26
 5 -3 4 0.12 0.15
 -5 3 -4 0.25 0.16
 5 3 4 0.23 0.18
 6 -3 4 7.18 0.45
 -6 3 -4 7 0.45
 6 3 4 7.36 0.5
 -7 -3 -4 0.6 0.21
 7 -3 4 0.11 0.18
 7 3 4 0.33 0.22
 -7 3 -4 0.35 0.19
 8 -3 4 0.77 0.24
 -8 -3 -4 0.33 0.21
 8 3 4 0.34 0.25
 -8 3 -4 0.16 0.2
 9 -3 4 6.57 0.51
 9 3 4 6.85 0.58
 10 -3 4 49.51 1.7
 10 3 4 48.46 1.76
 11 -3 4 0.07 0.26
 11 3 4 0.07 0.27
 12 -3 4 68.44 2.28
 12 3 4 68.84 2.36
 13 -3 4 1.85 0.4
 13 -3 4 1.87 0.5
 13 3 4 2.26 0.45
 14 -3 4 106.64 3.35
 14 -3 4 111.04 3.68
 14 3 4 101.08 3.41
 18 -4 -4 -0.05 0.52
 18 4 -4 0.29 0.62
 17 -4 -4 0.24 0.49
 17 4 -4 0.24 0.57
 16 -4 -4 6.38 0.77
 16 4 -4 5.86 0.8
 15 -4 -4 0.4 0.41
 15 4 -4 1.05 0.46
 14 -4 -4 101.47 3.41
 14 4 -4 105.47 3.5
 13 -4 -4 0.47 0.31
 13 4 -4 0.29 0.27
 13 4 -4 0.17 0.36
 12 -4 -4 119.68 3.74
 12 4 -4 123.06 3.81
 12 4 -4 117.22 3.52
 11 -4 -4 0.11 0.08
 11 -4 -4 0.58 0.28
 -11 4 4 0.12 0.21
 11 4 -4 0.28 0.25
 11 4 -4 0.33 0.32
 10 -4 -4 295.15 8.65
 10 -4 -4 292.21 7.69
 10 -4 -4 281.94 8.09
 10 4 -4 288.3 8.46
 10 4 -4 271.49 7.91
 -10 4 4 289.75 7.99
 10 4 -4 292.49 8.11
 9 -4 -4 18.41 1.2
 9 -4 -4 15.84 0.53
 9 -4 -4 15.91 0.83
 9 4 -4 16.5 1.09
 9 4 -4 16.05 0.73
 -9 4 4 15.15 0.73
 9 4 -4 16.59 0.82
 -8 -4 4 318.18 8.76
 8 -4 -4 320.65 8.61
 8 -4 -4 320.8 8.93
 8 -4 -4 322.2 9.33
 8 4 -4 317.64 9.19
 8 4 -4 317.87 8.78
 8 4 -4 324.78 8.88
 -8 4 4 326.9 8.86
 7 -4 -4 0.1 0.11
 7 -4 -4 -0.02 0.16
 -7 -4 4 0.06 0.13
 7 -4 -4 0.13 0.3
 7 4 -4 0.19 0.3
 7 4 -4 0.04 0.17
 7 4 -4 0.17 0.17
 -7 4 4 0.11 0.17
 6 -4 -4 219.82 6.55
 -6 -4 4 228.86 6.15
 6 -4 -4 224.61 6.28
 6 -4 -4 201.93 6.12
 6 4 -4 233.16 6.18
 -6 4 4 219.69 6.31
 6 4 -4 227.27 6.49
 6 4 -4 230.59 6.17
 5 -4 -4 9.07 0.52
 -5 -4 4 8.87 0.43
 5 -4 -4 9.68 0.69
 5 -4 -4 8.84 0.46
 5 4 -4 9.05 0.45
 -5 4 4 8.48 0.58
 5 4 -4 8.2 0.42
 5 4 -4 9.3 0.66
 -5 4 4 8.02 0.46
 4 -4 -4 80.07 2.59
 -4 -4 4 78.84 2.31
 4 -4 -4 79.53 2.32
 4 4 -4 77.56 2.58
 4 4 -4 79.53 2.33
 -4 4 4 80.29 2.33
 4 4 -4 80.8 2.28
 -3 -4 4 3.41 0.25
 3 -4 -4 3.87 0.26
 3 -4 -4 4.42 0.47
 3 4 -4 3.4 0.29
 -3 4 4 4.06 0.29
 3 4 -4 4.48 0.41
 3 4 -4 3.51 0.24
 -2 -4 4 22.2 0.78
 2 -4 -4 22.68 0.78
 2 4 -4 22.51 0.85
 -2 4 4 22.89 0.8
 2 4 -4 22.25 0.8
 1 -4 -4 0.57 0.14
 -1 -4 4 0.43 0.12
 1 4 -4 0.6 0.16
 -1 4 4 0.57 0.16
 0 -4 -4 1.27 0.19
 0 -4 4 0.96 0.17
 0 4 -4 1.3 0.2
 0 4 4 1.28 0.2
 -1 -4 -4 8.97 0.44
 1 -4 4 7.82 0.42
 1 4 4 8.38 0.45
 -1 4 -4 7.67 0.43
 -2 -4 -4 70.77 2.16
 2 -4 4 72.76 2.16
 -2 4 -4 72.17 2.16
 2 4 4 72.79 2.19
 3 -4 4 0.41 0.16
 -3 -4 -4 0.12 0.14
 -3 4 -4 0.7 0.18
 3 4 4 0.23 0.16
 -4 -4 -4 107.13 3.18
 4 -4 4 109.28 3.16
 -4 4 -4 109.02 3.16
 4 4 4 109.02 3.2
 -5 -4 -4 17.64 0.76
 5 -4 4 18.35 0.75
 -5 4 -4 16.74 0.74
 5 4 4 16.67 0.78
 6 -4 4 181.19 5.11
 -6 -4 -4 179.49 5.14
 -6 4 -4 180.61 5.11
 6 4 4 180.82 5.16
 -7 -4 -4 10.24 0.58
 7 -4 4 9.36 0.54
 7 4 4 9.46 0.6
 -7 4 -4 8.87 0.55
 8 -4 4 95.87 2.92
 -8 -4 -4 98.22 2.96
 -8 4 -4 96.49 2.92
 8 4 4 95.54 2.98
 9 -4 4 8.08 0.54
 9 4 4 7.97 0.61
 10 -4 4 155.38 4.52
 10 4 4 153.86 4.6
 11 -4 4 1.62 0.35
 11 -4 4 1.12 0.39
 11 4 4 1.2 0.38
 12 -4 4 44.59 1.82
 12 -4 4 42.13 1.62
 12 4 4 46.89 1.77
 13 -4 4 0.6 0.33
 13 -4 4 0.37 0.4
 13 4 4 1.13 0.4
 14 -4 4 10.53 0.76
 14 -4 4 10.51 1
 14 4 4 10.91 0.94
 18 -5 -4 72.34 2.83
 18 5 -4 67.31 2.86
 17 -5 -4 0.32 0.49
 17 5 -4 0.27 0.58
 16 -5 -4 117.04 3.93
 16 5 -4 116.97 4.01
 15 -5 -4 1.26 0.44
 15 5 -4 -0.07 0.45
 14 -5 -4 95.67 3.23
 14 5 -4 98.96 3.32
 14 5 -4 92.66 2.94
 13 -5 -4 0.34 0.32
 -13 5 4 0.56 0.3
 13 5 -4 0.27 0.3
 13 5 -4 0.74 0.43
 12 -5 -4 64.68 2.26
 12 5 -4 64.43 2.29
 -12 5 4 61.93 2.15
 12 5 -4 61.5 2.09
 11 -5 -4 5.83 0.62
 11 -5 -4 6.49 0.31
 11 5 -4 6.27 0.56
 11 5 -4 7.03 0.67
 -11 5 4 6.8 0.56
 10 -5 -4 2.1 0.61
 10 -5 -4 1.16 0.31
 10 -5 -4 1.34 0.16
 10 5 -4 1.31 0.37
 10 5 -4 1.45 0.34
 10 5 -4 1.1 0.52
 -10 5 4 1.73 0.33
 9 -5 -4 0.92 0.27
 9 -5 -4 1.06 0.16
 9 -5 -4 1.16 0.52
 9 5 -4 1.29 0.32
 9 5 -4 1.42 0.33
 9 5 -4 0.98 0.43
 -9 5 4 0.59 0.26
 8 -5 -4 8.82 0.88
 8 -5 -4 8.85 0.41
 8 -5 -4 9.03 0.6
 -8 -5 4 8.03 0.5
 8 5 -4 8.47 0.57
 8 5 -4 8.71 0.77
 -8 5 4 8.5 0.6
 8 5 -4 9.75 0.59
 7 -5 -4 0.07 0.26
 7 -5 -4 0.07 0.19
 -7 -5 4 -0.01 0.14
 7 -5 -4 0.09 0.15
 7 5 -4 -0.36 0.25
 7 5 -4 -0.08 0.16
 7 5 -4 -0.1 0.21
 -7 5 4 0.22 0.22
 6 -5 -4 80.69 2.4
 6 -5 -4 84.21 2.74
 -6 -5 4 79.58 2.4
 6 -5 -4 76.44 2.47
 6 5 -4 80.14 2.42
 6 5 -4 81.38 2.37
 -6 5 4 75.47 2.56
 -6 5 4 75.25 2.39
 6 5 -4 80.37 2.62
 5 -5 -4 3.38 0.39
 5 -5 -4 3.76 0.5
 5 -5 -4 4.57 0.4
 -5 -5 4 4.29 0.37
 5 5 -4 3.62 0.46
 5 5 -4 4.39 0.31
 -5 5 4 4.86 0.43
 5 5 -4 4.97 0.38
 -5 5 4 4.47 0.51
 4 -5 -4 210.4 5.78
 4 -5 -4 200.78 5.96
 -4 -5 4 209.73 5.76
 4 5 -4 206.81 5.77
 4 5 -4 207.24 5.65
 -4 5 4 202.21 5.78
 4 5 -4 213.53 5.97
 3 -5 -4 8.38 0.56
 -3 -5 4 8.41 0.44
 3 -5 -4 8.53 0.45
 3 5 -4 8.32 0.35
 -3 5 4 8.46 0.47
 3 5 -4 7.87 0.57
 3 5 -4 8.17 0.45
 -2 -5 4 99.86 2.88
 2 -5 -4 100.34 2.88
 -2 5 4 99.39 2.89
 2 5 -4 98.71 2.99
 2 5 -4 98.16 2.89
 1 -5 -4 0.13 0.12
 -1 -5 4 0.12 0.12
 1 5 -4 0.06 0.15
 -1 5 4 0.1 0.15
 1 5 -4 0.24 0.16
 0 -5 -4 252.74 6.93
 0 -5 4 252.14 6.92
 0 5 -4 250.64 6.93
 0 5 4 250.38 6.94
 1 -5 4 0.53 0.16
 -1 -5 -4 0.62 0.18
 1 5 4 0.34 0.18
 -1 5 -4 0.56 0.18
 -2 -5 -4 141.38 4.05
 2 -5 4 138.8 4.03
 2 5 4 140.26 4.07
 -2 5 -4 146.38 4.06
 3 -5 4 0.04 0.14
 -3 -5 -4 0.29 0.16
 -3 5 -4 0.39 0.18
 3 5 4 0.43 0.2
 4 -5 4 32.77 1.17
 -4 -5 -4 33.21 1.19
 4 5 4 31.81 1.2
 -4 5 -4 33.19 1.18
 5 -5 4 0.08 0.16
 -5 -5 -4 0.19 0.18
 5 5 4 0.3 0.22
 -5 5 -4 0.21 0.19
 -6 -5 -4 9.32 0.56
 6 -5 4 8.08 0.52
 6 5 4 8.43 0.59
 -6 5 -4 9.27 0.56
 7 -5 4 0.52 0.22
 -7 -5 -4 0.21 0.21
 -7 5 -4 0.45 0.23
 7 5 4 0.38 0.27
 8 -5 4 2.1 0.33
 -8 -5 -4 2.53 0.37
 8 5 4 1.99 0.37
 -8 5 -4 2.25 0.51
 9 -5 4 3.7 0.42
 9 -5 4 3.1 0.43
 9 5 4 2.76 0.45
 10 -5 4 32.78 1.31
 10 -5 4 36.05 1.43
 10 5 4 34.4 1.43
 11 -5 4 7.76 0.62
 11 -5 4 8.45 0.75
 11 5 4 7.93 0.73
 12 -5 4 61.38 2.27
 12 -5 4 61.56 2.11
 12 5 4 60.73 2.23
 13 -5 4 3.13 0.48
 13 -5 4 2.67 0.54
 13 5 4 1.02 0.45
 14 -5 4 77.74 2.61
 14 -5 4 79.31 2.84
 14 5 4 77.53 2.77
 17 -6 -4 1.18 0.53
 17 6 -4 0.19 0.55
 16 -6 -4 10.92 1.04
 16 6 -4 9.18 1.01
 15 -6 -4 1.29 0.47
 15 6 -4 0.87 0.51
 14 -6 -4 48.11 1.95
 14 6 -4 44.98 1.72
 14 6 -4 49.71 2.03
 13 -6 -4 0.53 0.38
 -13 6 4 -0.05 0.29
 13 6 -4 0.28 0.32
 13 6 -4 0.69 0.45
 12 -6 -4 128.85 3.99
 12 -6 -4 128.12 3.52
 -12 6 4 128.73 3.93
 12 6 -4 121.17 3.99
 12 6 -4 125.72 3.84
 11 -6 -4 1.98 0.4
 11 -6 -4 2.05 0.22
 -11 6 4 1.69 0.38
 11 6 -4 1.57 0.43
 11 6 -4 1.79 0.41
 10 -6 -4 143.09 3.96
 10 -6 -4 144.73 4.32
 10 -6 -4 141.03 4.72
 -10 6 4 143.99 4.31
 10 6 -4 140.05 4.23
 10 6 -4 141.72 4.3
 9 -6 -4 4.73 0.53
 9 -6 -4 5.02 0.34
 9 -6 -4 3.94 0.68
 -9 6 4 4.86 0.53
 9 6 -4 3.79 0.48
 9 6 -4 4.83 0.62
 9 6 -4 5.89 0.57
 -8 -6 4 187.54 5.67
 8 -6 -4 204.35 6.08
 8 -6 -4 206.34 5.56
 8 -6 -4 198.55 5.75
 8 6 -4 191.2 5.71
 8 6 -4 202.68 5.89
 8 6 -4 208.39 5.71
 -8 6 4 198.67 5.82
 -7 -6 4 41.94 1.5
 7 -6 -4 44.94 1.58
 7 -6 -4 41.28 1.46
 7 -6 -4 44.12 1.79
 7 6 -4 42.81 1.55
 -7 6 4 43.08 1.46
 -7 6 4 43.55 1.67
 7 6 -4 44.58 1.49
 7 6 -4 44.02 1.67
 6 -6 -4 134.58 4.08
 6 -6 -4 141.33 4.35
 6 -6 -4 138.13 4.16
 -6 -6 4 141 4.1
 6 6 -4 149.08 4.24
 6 6 -4 140.02 4.13
 6 6 -4 144.72 4.02
 -6 6 4 137.65 4.09
 -6 6 4 141.93 4.31
 5 -6 -4 5.05 0.55
 -5 -6 4 4.34 0.4
 5 -6 -4 5.39 0.47
 -5 6 4 4.93 0.47
 5 6 -4 5.61 0.34
 5 6 -4 3.87 0.42
 -5 6 4 4.47 0.56
 5 6 -4 4.46 0.48
 -4 -6 4 95.64 2.87
 4 -6 -4 98.39 2.91
 4 -6 -4 96.59 3.01
 -4 6 4 94.64 2.91
 4 6 -4 98.91 2.97
 4 6 -4 92.78 2.89
 4 6 -4 95.18 2.7
 3 -6 -4 7.81 0.53
 3 -6 -4 7.26 0.46
 -3 -6 4 7.59 0.46
 -3 6 4 7.08 0.5
 3 6 -4 8.24 0.65
 3 6 -4 6.53 0.48
 3 6 -4 8.16 0.32
 2 -6 -4 3.13 0.32
 -2 -6 4 3.97 0.36
 -2 6 4 3.98 0.4
 2 6 -4 2.78 0.32
 2 6 -4 3.97 0.46
 1 -6 -4 1.19 0.23
 -1 -6 4 0.89 0.21
 1 6 -4 1 0.24
 1 6 -4 1.23 0.28
 -1 6 4 1.28 0.25
 0 -6 -4 4.81 0.38
 0 -6 4 5.46 0.44
 0 6 4 4.99 0.44
 0 6 -4 4.92 0.47
 0 6 -4 5.18 0.45
 1 -6 4 0.16 0.07
 1 -6 4 0.17 0.15
 -1 -6 -4 0.18 0.14
 -1 6 -4 0.02 0.16
 1 6 4 0.04 0.16
 -1 6 -4 0.18 0.19
 -2 -6 -4 45.12 1.54
 2 -6 4 46.45 1.52
 2 -6 4 44.84 1.33
 2 6 4 45.56 1.56
 -2 6 -4 45.95 1.54
 3 -6 4 12.79 0.51
 3 -6 4 12.36 0.63
 -3 -6 -4 12.58 0.64
 -3 6 -4 12.6 0.65
 3 6 4 13.38 0.68
 4 -6 4 105.95 3.09
 4 -6 4 106.5 3.2
 -4 -6 -4 110.21 3.26
 -4 6 -4 108.27 3.22
 4 6 4 111.28 3.28
 -5 -6 -4 9.33 0.58
 5 -6 4 9.25 0.49
 5 -6 4 9.1 0.55
 5 6 4 9.05 0.61
 -5 6 -4 8.19 0.54
 6 -6 4 107.04 3.17
 -6 -6 -4 106.6 3.28
 6 -6 4 110.55 3.25
 -6 6 -4 108.54 3.24
 6 6 4 107.1 3.31
 7 -6 4 6.56 0.49
 7 -6 4 6.38 0.49
 -7 -6 -4 6.32 0.57
 -7 6 -4 7.22 0.53
 7 6 4 7.53 0.64
 -8 -6 -4 121.66 3.66
 8 -6 4 120.15 3.59
 8 -6 4 117.91 3.58
 8 6 4 118.71 3.68
 9 -6 4 5.12 0.52
 9 -6 4 5 0.51
 9 6 4 4.56 0.55
 10 -6 4 86.3 2.76
 10 -6 4 81.53 2.67
 10 6 4 84.85 2.81
 11 -6 4 0.73 0.33
 11 -6 4 -0.04 0.27
 11 6 4 1.04 0.41
 12 -6 4 33.17 1.39
 12 -6 4 34.35 1.5
 12 6 4 36.43 1.59
 13 -6 4 -0.54 0.3
 13 -6 4 -0.15 0.3
 13 6 4 0.02 0.41
 14 -6 4 7.4 0.85
 14 -6 4 7.83 0.72
 14 6 4 7.78 0.87
 17 -7 -4 0.46 0.51
 17 7 -4 0.84 0.56
 16 -7 -4 66.76 2.55
 16 7 -4 60.78 2.57
 15 -7 -4 1.02 0.49
 15 7 -4 0.94 0.54
 15 7 -4 0.96 0.4
 14 -7 -4 51.91 2.07
 14 7 -4 50.84 1.91
 14 7 -4 50.13 2.1
 13 -7 -4 0.55 0.4
 -13 7 4 0.29 0.35
 13 7 -4 0.78 0.38
 13 7 -4 0.1 0.39
 12 -7 -4 25.96 1.26
 12 -7 -4 24.73 0.89
 12 7 -4 26.68 1.24
 12 7 -4 25.8 1.3
 -12 7 4 25.69 1.27
 11 -7 -4 4.61 0.56
 11 -7 -4 4.38 0.34
 -11 7 4 3.44 0.54
 11 7 -4 5.32 0.6
 11 7 -4 4.6 0.59
 10 -7 -4 5.49 0.59
 10 -7 -4 4.08 0.35
 -10 7 4 4.71 0.59
 10 7 -4 4.21 0.57
 10 7 -4 4.7 0.55
 9 -7 -4 0.77 0.46
 9 -7 -4 0.67 0.3
 9 -7 -4 0.7 0.21
 9 7 -4 0.39 0.34
 -9 7 4 0.43 0.32
 9 7 -4 0.16 0.28
 8 -7 -4 2.65 0.34
 -8 -7 4 2.67 0.39
 8 -7 -4 2.84 0.56
 8 -7 -4 2.22 0.38
 8 7 -4 3.07 0.41
 8 7 -4 3.67 0.52
 -8 7 4 2.26 0.44
 8 7 -4 1.98 0.42
 7 -7 -4 -0.16 0.19
 -7 -7 4 -0.06 0.2
 7 -7 -4 0.03 0.31
 7 -7 -4 0 0.23
 7 7 -4 -0.34 0.27
 -7 7 4 -0.09 0.22
 7 7 -4 -0.08 0.27
 7 7 -4 0.03 0.21
 -7 7 4 -0.04 0.29
 6 -7 -4 59.24 1.99
 -6 -7 4 57.31 2
 6 -7 -4 59.64 2.16
 -6 7 4 60.64 2.23
 6 7 -4 60.51 2.05
 6 7 -4 62.12 1.88
 6 7 -4 62.37 2.03
 -6 7 4 56.67 1.99
 -5 -7 4 1.09 0.26
 5 -7 -4 2.21 0.34
 5 -7 -4 1.23 0.33
 5 7 -4 1.13 0.21
 5 7 -4 1.63 0.32
 5 7 -4 1.06 0.33
 -5 7 4 1.08 0.3
 4 -7 -4 75.48 2.42
 -4 -7 4 70.62 2.34
 4 -7 -4 73.32 2.39
 4 7 -4 74.24 2.12
 4 7 -4 75.38 2.33
 -4 7 4 73.98 2.41
 4 7 -4 76.02 2.41
 3 -7 -4 -0.11 0.16
 -3 -7 4 0.33 0.2
 3 -7 -4 0.3 0.2
 3 7 -4 -0.2 0.27
 3 7 -4 0.26 0.09
 -3 7 4 0.51 0.25
 3 7 -4 -0.19 0.2
 -2 -7 4 160.37 4.65
 2 -7 -4 162.38 4.65
 2 -7 -4 159.74 4.65
 -2 7 4 159.28 4.68
 2 7 -4 168.22 4.7
 2 7 -4 158.46 4.84
 1 -7 -4 10.58 0.58
 -1 -7 4 10.15 0.58
 1 7 -4 9.56 0.68
 1 7 -4 9.65 0.61
 -1 7 4 9.7 0.61
 0 -7 4 102.28 3.06
 0 -7 -4 100.07 3.06
 0 7 -4 103.02 3.19
 0 7 -4 102.22 3.08
 0 7 4 101.83 3.09
 -1 -7 -4 1.58 0.27
 1 -7 4 1.16 0.11
 1 -7 4 0.93 0.23
 -1 7 -4 1.23 0.29
 1 7 4 1.2 0.27
 -1 7 -4 0.96 0.26
 2 -7 4 91.24 2.49
 2 -7 4 89.6 2.73
 -2 -7 -4 88.36 2.75
 -2 7 -4 90.02 2.75
 2 7 4 86.3 2.77
 -3 -7 -4 0.84 0.26
 3 -7 4 1.5 0.19
 3 -7 4 1.1 0.25
 -3 7 -4 0.85 0.26
 3 7 4 1.23 0.32
 4 -7 4 52.68 1.76
 4 -7 4 51.76 1.59
 -4 -7 -4 50.7 1.77
 4 7 4 51.75 1.81
 -4 7 -4 51.74 1.76
 5 -7 4 2.91 0.38
 5 -7 4 2.31 0.28
 -5 -7 -4 2.72 0.39
 5 7 4 2.72 0.43
 -5 7 -4 2.64 0.38
 -6 -7 -4 2.4 0.39
 6 -7 4 2.13 0.29
 6 -7 4 2.07 0.33
 -6 7 -4 1.92 0.33
 6 7 4 1.39 0.38
 7 -7 4 6.51 0.47
 -7 -7 -4 6.63 0.62
 7 -7 4 6.85 0.58
 7 7 4 7.22 0.67
 -7 7 -4 6.9 0.55
 8 -7 4 2.21 0.36
 -8 -7 -4 2.06 0.38
 8 -7 4 2.04 0.36
 8 7 4 3.12 0.49
 9 -7 4 2.22 0.38
 9 -7 4 2.63 0.39
 9 7 4 2.03 0.47
 10 -7 4 28.08 1.2
 10 -7 4 26.76 1.17
 10 7 4 26.71 1.32
 11 -7 4 5.68 0.57
 11 -7 4 6.82 0.65
 11 7 4 5.22 0.69
 12 -7 4 38.56 1.55
 12 -7 4 40.65 1.67
 12 7 4 40 1.74
 13 -7 4 9.12 0.86
 13 -7 4 9.27 0.73
 13 7 4 8.77 0.91
 17 -8 -4 0.98 0.55
 17 8 -4 -0.04 0.56
 16 -8 -4 4.86 0.74
 16 8 -4 5.79 0.85
 15 -8 -4 0.32 0.45
 15 8 -4 1.95 0.62
 15 8 -4 1.14 0.46
 14 -8 -4 32.79 1.57
 14 8 -4 32.55 1.62
 14 8 -4 33.06 1.47
 13 -8 -4 0.51 0.4
 13 8 -4 0.45 0.43
 -13 8 4 0.9 0.42
 13 8 -4 1.2 0.44
 12 -8 -4 48.83 1.56
 12 -8 -4 48.13 1.92
 12 8 -4 48.7 1.91
 12 8 -4 50.7 1.96
 -12 8 4 46.84 1.97
 11 -8 -4 3.43 0.35
 11 -8 -4 3.1 0.52
 11 8 -4 3.8 0.57
 -11 8 4 2.79 0.54
 11 8 -4 3.83 0.56
 10 -8 -4 148.68 4.23
 10 -8 -4 144.81 4.49
 -10 8 4 147.68 4.62
 10 8 -4 146.51 4.47
 10 8 -4 149.05 4.51
 9 -8 -4 12.79 0.68
 9 -8 -4 11.9 0.81
 9 8 -4 12.71 0.89
 -9 8 4 12.19 0.92
 8 -8 -4 119.64 3.6
 8 -8 -4 117.04 3.79
 -8 -8 4 113.62 3.57
 8 -8 -4 117.02 3.49
 8 8 -4 112.46 3.55
 -8 8 4 112.14 3.76
 8 8 -4 116.12 3.63
 7 -8 -4 7.71 0.61
 -7 -8 4 8.06 0.62
 7 -8 -4 8.19 0.78
 7 8 -4 8.39 0.75
 7 8 -4 8.05 0.62
 -7 8 4 10.09 0.84
 -7 8 4 8.79 0.65
 -6 -8 4 99.67 3.19
 6 -8 -4 102.56 3.27
 6 -8 -4 104.68 3.19
 -6 8 4 99.16 3.17
 -6 8 4 109.27 3.47
 6 8 -4 99.2 3.23
 6 8 -4 99.88 3.07
 5 -8 -4 6.8 0.6
 5 -8 -4 6.09 0.6
 -5 -8 4 6.09 0.57
 5 8 -4 5.11 0.37
 5 8 -4 5.51 0.47
 5 8 -4 5.27 0.6
 -5 8 4 6.39 0.63
 4 -8 -4 42.81 1.51
 4 -8 -4 41.89 1.55
 -4 -8 4 39.24 1.52
 4 8 -4 40.39 1.57
 4 8 -4 40.91 1.25
 -4 8 4 40.5 1.57
 4 8 -4 41.5 1.4
 -3 -8 4 5.59 0.53
 3 -8 -4 5.11 0.55
 3 -8 -4 5.15 0.44
 3 8 -4 5.81 0.7
 3 8 -4 5.58 0.47
 3 8 -4 4.93 0.55
 -3 8 4 4.95 0.54
 2 -8 -4 3.01 0.35
 -2 -8 4 2.91 0.41
 2 -8 -4 2.89 0.37
 -2 8 4 2.78 0.4
 2 8 -4 3.58 0.54
 2 8 -4 3.81 0.49
 1 -8 -4 2.13 0.35
 -1 -8 4 1.64 0.3
 -1 8 4 2.39 0.41
 1 8 -4 1.36 0.33
 1 8 -4 1.22 0.38
 0 -8 4 1.67 0.33
 0 -8 -4 2.62 0.36
 0 8 -4 2.11 0.39
 0 8 -4 1.72 0.41
 0 8 4 2.05 0.37
 1 -8 4 3.58 0.43
 -1 -8 -4 4.48 0.46
 -1 8 -4 3.86 0.47
 -1 8 -4 3.21 0.46
 1 8 4 3.59 0.47
 -2 -8 -4 55.44 1.91
 2 -8 4 54.79 1.89
 2 -8 4 52.6 1.59
 -2 8 -4 59.3 2.05
 2 8 4 56.03 1.96
 -2 8 -4 57.29 1.93
 -3 -8 -4 4.97 0.52
 3 -8 4 3.95 0.28
 3 -8 4 4.42 0.48
 -3 8 -4 4.04 0.47
 3 8 4 5.91 0.6
 -3 8 -4 3.95 0.52
 4 -8 4 59.24 2.02
 -4 -8 -4 60.24 2.06
 4 -8 4 59.41 1.81
 4 8 4 61.08 2.11
 -4 8 -4 61.05 2.19
 -4 8 -4 59.39 2.03
 5 -8 4 28.43 1.17
 5 -8 4 28.92 1.02
 -5 -8 -4 28.17 1.22
 -5 8 -4 27.81 1.19
 5 8 4 29.19 1.28
 6 -8 4 148.75 4.44
 -6 -8 -4 153.76 4.52
 6 -8 4 149.21 4.29
 -6 8 -4 153.01 4.47
 6 8 4 146.32 4.54
 -7 -8 -4 15.94 0.88
 7 -8 4 13.17 0.69
 7 -8 4 14.08 0.8
 -7 8 -4 13.28 0.78
 7 8 4 12.24 0.87
 8 -8 4 61.35 2.01
 8 -8 4 61.41 2.08
 -8 -8 -4 60.91 2.17
 8 8 4 56.87 2.19
 9 -8 4 6.32 0.58
 9 -8 4 5.07 0.54
 9 8 4 4.81 0.67
 10 -8 4 52.41 1.91
 10 -8 4 53.51 1.9
 10 8 4 52 2.08
 11 -8 4 0.56 0.5
 11 -8 4 0.79 0.34
 11 8 4 0.44 0.44
 12 -8 4 19.86 1.03
 12 8 4 17.94 1.22
 13 -8 4 -0.07 0.32
 13 8 4 1.24 0.57
 16 -9 -4 28.97 1.54
 16 9 -4 24.39 1.55
 15 -9 -4 0.8 0.49
 15 9 -4 1.31 0.5
 15 9 -4 0.84 0.56
 14 -9 -4 25.72 1.38
 14 9 -4 26.12 1.36
 14 9 -4 25.16 1.42
 13 -9 -4 2.8 0.42
 13 -9 -4 3.46 0.59
 -13 9 4 2.36 0.57
 13 9 -4 3.37 0.6
 13 9 -4 2.22 0.57
 12 -9 -4 30.72 1.14
 12 -9 -4 32.68 1.48
 -12 9 4 31.97 1.57
 12 9 -4 27.37 1.41
 12 9 -4 29.87 1.45
 11 -9 -4 5.38 0.48
 11 -9 -4 5.37 0.66
 -11 9 4 4.45 0.69
 11 9 -4 5.68 0.66
 11 9 -4 4.71 0.66
 10 -9 -4 1.39 0.39
 10 -9 -4 1.41 0.31
 10 9 -4 1.93 0.51
 -10 9 4 1.48 0.51
 9 -9 -4 3.81 0.46
 9 -9 -4 3.81 0.52
 9 9 -4 5.17 0.67
 -9 9 4 4.62 0.68
 8 -9 -4 0.85 0.39
 -8 -9 4 1.35 0.35
 8 -9 -4 0.88 0.33
 8 9 -4 0.85 0.45
 -8 9 4 1.11 0.47
 7 -9 -4 0.39 0.29
 7 -9 -4 0.39 0.31
 -7 -9 4 0.07 0.27
 -7 9 4 0.2 0.36
 7 9 -4 -0.06 0.37
 6 -9 -4 24.92 1.15
 -6 -9 4 24.28 1.14
 6 -9 -4 23.93 1.15
 6 9 -4 23.11 1.21
 -6 9 4 25.2 1.17
 -6 9 4 27.89 1.43
 6 9 -4 23.71 0.97
 5 -9 -4 0.36 0.25
 5 -9 -4 0.48 0.28
 -5 -9 4 0.03 0.24
 -5 9 4 0.56 0.33
 5 9 -4 0.2 0.37
 5 9 -4 0.02 0.19
 4 -9 -4 70.77 2.35
 4 -9 -4 68.14 2.24
 -4 -9 4 69.66 2.35
 4 9 -4 67.96 1.98
 -4 9 4 64 2.34
 4 9 -4 66.02 2.37
 4 9 -4 72.87 2.09
 3 -9 -4 -0.11 0.23
 3 -9 -4 0.22 0.2
 -3 -9 4 0.13 0.22
 3 9 -4 -0.21 0.38
 3 9 -4 0.34 0.21
 -3 9 4 0.38 0.32
 3 9 -4 0.09 0.29
 2 -9 -4 106.96 3.16
 -2 -9 4 111.01 3.37
 2 -9 -4 111.73 3.38
 2 9 -4 105.93 3.38
 -2 9 4 102.24 3.36
 2 9 -4 103.21 3.57
 1 -9 -4 0.28 0.24
 -1 -9 4 0.57 0.27
 1 -9 -4 0.09 0.17
 1 9 -4 0.37 0.3
 1 9 -4 0.39 0.37
 -1 9 4 0.36 0.29
 0 -9 -4 107 3.3
 0 -9 4 107.34 3.31
 0 9 4 102.15 3.32
 0 9 -4 103.62 3.46
 0 9 -4 107.54 3.34
 -1 -9 -4 0.01 0.24
 1 -9 4 0.15 0.25
 -1 9 -4 -0.12 0.28
 -1 9 -4 0.03 0.28
 1 9 4 0.06 0.3
 2 -9 4 62.92 2.13
 -2 -9 -4 59.85 2.13
 2 9 4 63.18 2.2
 -2 9 -4 61.55 2.27
 -2 9 -4 61.38 2.15
 3 -9 4 0.55 0.25
 -3 -9 -4 0.71 0.3
 -3 9 -4 0.39 0.35
 -3 9 -4 0.51 0.28
 3 9 4 0.67 0.38
 -4 -9 -4 17.43 0.94
 4 -9 4 16.5 0.87
 -4 9 -4 17.26 1.01
 -4 9 -4 15.92 0.88
 4 9 4 17.96 1.02
 5 -9 4 0.16 0.23
 -5 -9 -4 0.06 0.25
 -5 9 -4 -0.12 0.25
 -5 9 -4 0.02 0.35
 5 9 4 -0.03 0.3
 6 -9 4 4.2 0.5
 -6 -9 -4 5.71 0.62
 6 9 4 5.1 0.64
 -6 9 -4 5.57 0.7
 -6 9 -4 5.47 0.58
 7 -9 4 0.12 0.26
 -7 -9 -4 0.24 0.29
 7 9 4 0.19 0.38
 -7 9 -4 -0.22 0.35
 -7 9 -4 -0.15 0.29
 -8 -9 -4 2.19 0.45
 8 -9 4 3.22 0.48
 8 9 4 1.85 0.5
 9 -9 4 3.87 0.51
 9 9 4 3.56 0.64
 10 -9 4 15.38 0.9
 10 9 4 14.77 1.08
 11 -9 4 3.86 0.55
 11 9 4 4.2 0.72
 12 -9 4 17.23 1
 12 9 4 14.44 1.24
 16 -10 -4 1.79 0.61
 16 10 -4 2.3 0.59
 16 10 -4 2.72 0.7
 15 -10 -4 0.01 0.45
 15 10 -4 0.01 0.5
 15 10 -4 -0.47 0.45
 14 -10 -4 10.81 0.98
 14 10 -4 9.05 0.95
 14 10 -4 11.33 0.97
 13 -10 -4 -0.06 0.23
 13 -10 -4 0.03 0.37
 13 10 -4 0.05 0.44
 13 10 -4 0.05 0.42
 -13 10 4 -0.35 0.41
 12 -10 -4 54.2 2.08
 12 -10 -4 48.94 1.76
 -12 10 4 51.77 2.23
 12 10 -4 49.37 2.04
 12 10 -4 53.85 2.12
 11 -10 -4 2.44 0.4
 11 -10 -4 2.85 0.55
 11 10 -4 2.08 0.56
 -11 10 4 1.98 0.59
 11 10 -4 2.52 0.53
 10 -10 -4 42.2 1.76
 10 -10 -4 41.55 1.61
 10 10 -4 48.19 1.91
 -10 10 4 40.82 1.94
 9 -10 -4 2.81 0.46
 -9 10 4 3.15 0.63
 9 10 -4 3.33 0.61
 -8 -10 4 75.79 2.59
 8 -10 -4 73.16 2.53
 8 10 -4 75.61 2.67
 -8 10 4 71.74 2.79
 7 -10 -4 9.69 0.73
 -7 -10 4 9.41 0.75
 7 10 -4 8.53 0.85
 -7 10 4 9.73 0.97
 -6 -10 4 36.17 1.49
 6 -10 -4 35.8 1.48
 6 -10 -4 33.83 1.41
 -6 10 4 36.08 1.52
 6 10 -4 31.43 1.52
 5 -10 -4 6.51 0.55
 -5 -10 4 7.1 0.72
 5 -10 -4 6.9 0.66
 -5 10 4 6.34 0.68
 5 10 -4 4.36 0.65
 4 -10 -4 52.17 1.95
 4 -10 -4 53.28 1.8
 -4 -10 4 51.97 1.97
 -4 10 4 55.15 2.02
 4 10 -4 53.35 2.05
 3 -10 -4 4.24 0.41
 -3 -10 4 3.75 0.5
 3 -10 -4 3.58 0.52
 3 10 -4 3.99 0.58
 -3 10 4 3.6 0.58
 -2 -10 4 8.46 0.66
 2 -10 -4 7.82 0.71
 2 -10 -4 7.42 0.46
 2 10 -4 5.94 0.69
 -2 10 4 7.7 0.77
 2 10 -4 8.25 0.89
 1 -10 -4 0.32 0.17
 1 -10 -4 0.35 0.28
 -1 -10 4 0.03 0.23
 1 10 -4 0.22 0.41
 -1 10 4 0.5 0.38
 1 10 -4 0.1 0.34
 0 -10 4 3.25 0.5
 0 -10 -4 2.98 0.45
 0 10 -4 4.2 0.6
 0 10 -4 3.74 0.61
 0 10 4 3.21 0.51
 -1 -10 -4 6.7 0.65
 1 -10 4 7.54 0.69
 1 10 4 6.06 0.65
 -1 10 -4 6.81 0.72
 -1 10 -4 5.86 0.7
 -2 -10 -4 13.97 0.86
 2 -10 4 13.05 0.81
 2 10 4 11.86 0.91
 -2 10 -4 12.53 0.85
 -2 10 -4 13.65 0.95
 3 -10 4 2.87 0.47
 -3 -10 -4 2.72 0.44
 3 10 4 2.08 0.47
 -3 10 -4 3.17 0.53
 -3 10 -4 3.06 0.54
 4 -10 4 46.85 1.79
 -4 -10 -4 46.4 1.8
 -4 10 -4 47.21 1.8
 4 10 4 46.02 1.86
 -4 10 -4 46.43 1.96
 -5 -10 -4 6.33 0.69
 5 -10 4 5.64 0.61
 -5 10 -4 5.26 0.63
 -5 10 -4 5.87 0.72
 5 10 4 5.87 0.73
 6 -10 4 51.29 1.92
 -6 -10 -4 51.6 1.98
 6 10 4 50.54 2.05
 -6 10 -4 51.28 2.13
 -6 10 -4 50.8 1.93
 -7 -10 -4 12.13 0.86
 7 -10 4 13.41 0.86
 -7 10 -4 13.08 1
 7 10 4 12.12 0.94
 -8 -10 -4 55.22 2.18
 8 -10 4 57.48 2.11
 8 10 4 57.92 2.28
 -8 10 -4 59.2 2.38
 9 -10 4 5.86 0.64
 9 10 4 6.82 0.87
 -9 10 -4 4.83 0.74
 10 -10 4 31.51 1.44
 10 10 4 32.3 1.65
 -10 10 -4 31.43 1.7
 11 -10 4 1.71 0.45
 -11 10 -4 1.38 0.57
 11 10 4 2.23 0.7
 12 -10 4 7.68 0.74
 -12 10 -4 6.28 0.92
 12 10 4 6.41 0.94
 15 -11 -4 1.94 0.61
 15 11 -4 1.69 0.58
 15 11 -4 0.6 0.55
 14 -11 -4 14.36 1.18
 14 11 -4 11.86 1.08
 14 11 -4 12.27 1.08
 13 -11 -4 2.53 0.59
 13 -11 -4 1.91 0.38
 13 11 -4 2.38 0.64
 13 11 -4 1.49 0.51
 -13 11 4 2.67 0.7
 12 -11 -4 10.53 0.71
 12 -11 -4 8.09 0.86
 12 11 -4 9.05 0.93
 -12 11 4 8.49 1.02
 12 11 -4 8.1 0.82
 11 -11 -4 1.52 0.4
 11 -11 -4 0.7 0.42
 11 11 -4 1.31 0.48
 11 11 -4 1.08 0.54
 -11 11 4 1.12 0.55
 10 -11 -4 0.88 0.36
 -10 11 4 0.73 0.53
 10 11 -4 0.73 0.54
 9 -11 -4 0 0.32
 9 11 -4 0.15 0.45
 -9 11 4 -0.39 0.42
 8 -11 -4 0.86 0.39
 -8 -11 4 1.07 0.39
 -8 11 4 0.35 0.48
 8 11 -4 0.45 0.46
 -7 -11 4 1.67 0.45
 7 -11 -4 1.51 0.42
 7 11 -4 0.91 0.49
 -6 -11 4 11.23 0.83
 6 -11 -4 10.5 0.82
 6 11 -4 9.63 0.9
 -6 11 4 10.94 0.92
 5 -11 -4 2.39 0.41
 5 -11 -4 1.99 0.43
 -5 -11 4 3.15 0.53
 -5 11 4 2.58 0.52
 5 11 -4 3.66 0.65
 -4 -11 4 34.24 1.52
 4 -11 -4 35.1 1.51
 -4 11 4 34.47 1.56
 4 11 -4 35.41 1.59
 3 -11 -4 0.01 0.24
 -3 -11 4 -0.04 0.29
 3 11 -4 -0.22 0.35
 -3 11 4 -0.23 0.3
 2 -11 -4 69.8 2.48
 -2 -11 4 69.73 2.5
 2 11 -4 69.47 2.56
 -2 11 4 72.04 2.55
 2 11 -4 71.61 2.78
 1 -11 -4 0.27 0.29
 -1 -11 4 0.68 0.34
 -1 11 4 0.4 0.38
 1 11 -4 0.6 0.44
 1 11 -4 -0.06 0.46
 0 -11 -4 57.73 2.14
 0 -11 4 54.55 2.08
 0 11 -4 54.36 2.31
 0 11 -4 54.8 2.15
 0 11 4 59.66 2.22
 1 -11 4 1.64 0.44
 -1 -11 -4 1.7 0.43
 -1 11 -4 2.06 0.54
 1 11 4 1.86 0.53
 -1 11 -4 1.34 0.53
 -2 -11 -4 30.81 1.42
 2 -11 4 34.88 1.46
 2 11 4 28.98 1.48
 -2 11 -4 29.09 1.45
 -2 11 -4 29.4 1.53
 -3 -11 -4 0.51 0.34
 3 -11 4 0.39 0.32
 -3 11 -4 -0.01 0.39
 -3 11 -4 0.19 0.38
 3 11 4 0.08 0.38
 -4 -11 -4 11.18 0.86
 4 -11 4 11.22 0.84
 4 11 4 11.33 0.98
 -4 11 -4 13.85 1.02
 -4 11 -4 10.79 0.93
 -5 -11 -4 0.26 0.35
 5 -11 4 0.4 0.33
 -5 11 -4 0.31 0.38
 -5 11 -4 0.49 0.47
 5 11 4 0.51 0.46
 6 -11 4 -0.14 0.32
 -6 -11 -4 0.56 0.41
 6 11 4 0.29 0.46
 -6 11 -4 0.6 0.48
 -6 11 -4 1 0.42
 7 -11 4 2.77 0.54
 -7 -11 -4 3.37 0.58
 -7 11 -4 2.05 0.61
 7 11 4 2.65 0.64
 8 -11 4 4.58 0.64
 -8 -11 -4 4.47 0.69
 8 11 4 3.91 0.75
 -8 11 -4 4.68 0.79
 9 -11 4 3.52 0.58
 -9 11 -4 3.42 0.72
 9 11 4 1.61 0.61
 10 -11 4 8.31 0.83
 -10 11 -4 9.62 1.1
 10 11 4 9.13 1.05
 11 -11 4 5.89 0.71
 11 11 4 6.29 0.95
 -11 11 -4 7.63 1.02
 14 -12 -4 4.89 0.78
 14 12 -4 6.11 0.85
 13 -12 -4 0.16 0.43
 13 -12 -4 0.03 0.32
 13 12 -4 -1.19 0.44
 -13 12 4 -0.15 0.53
 12 -12 -4 12.72 0.87
 12 12 -4 13.31 1.16
 -12 12 4 13.68 1.32
 11 -12 -4 0.79 0.39
 -11 12 4 0.36 0.54
 11 12 -4 1.07 0.57
 10 -12 -4 23.02 1.24
 10 12 -4 28.05 1.54
 -10 12 4 27.2 1.66
 9 -12 -4 1.08 0.43
 9 12 -4 1.37 0.54
 -9 12 4 0.41 0.55
 -8 -12 4 26.01 1.36
 8 -12 -4 26.42 1.36
 -8 12 4 29.48 1.66
 8 12 -4 27.81 1.5
 -7 -12 4 1.69 0.44
 7 -12 -4 3.22 0.55
 7 12 -4 2.14 0.59
 6 -12 -4 36.18 1.57
 -6 -12 4 34.52 1.57
 6 12 -4 32.77 1.66
 -5 -12 4 6.96 0.76
 5 -12 -4 6.62 0.7
 -5 12 4 7.35 0.79
 5 12 -4 6.88 0.83
 4 -12 -4 9.07 0.83
 -4 -12 4 10.75 0.85
 -4 12 4 12.23 1
 4 12 -4 10.04 0.92
 3 -12 -4 3.68 0.53
 -3 -12 4 4.35 0.59
 3 12 -4 3.03 0.63
 -3 12 4 4.64 0.64
 2 -12 -4 1.62 0.42
 -2 -12 4 0.79 0.37
 2 12 -4 1.06 0.46
 -2 12 4 1.34 0.49
 1 -12 -4 1.02 0.41
 -1 -12 4 0.94 0.41
 1 12 -4 0.94 0.56
 1 12 -4 1.16 0.52
 -1 12 4 0.69 0.47
 0 -12 4 0.34 0.35
 0 -12 -4 0.64 0.37
 0 12 4 0.4 0.49
 0 12 -4 0.53 0.48
 0 12 -4 0.56 0.46
 -1 -12 -4 4.18 0.6
 1 -12 4 5.05 0.65
 1 12 4 4.25 0.65
 -1 12 -4 4.19 0.71
 -1 12 -4 5.05 0.73
 -2 -12 -4 23.41 1.27
 2 -12 4 24.45 1.28
 2 12 4 24.48 1.34
 -2 12 -4 24.72 1.36
 -2 12 -4 20.87 1.41
 3 -12 4 4.34 0.59
 -3 -12 -4 5.18 0.68
 -3 12 -4 3.99 0.64
 -3 12 -4 3.48 0.65
 3 12 4 4.21 0.75
 4 -12 4 25.12 1.28
 -4 -12 -4 24.11 1.32
 -4 12 -4 21.36 1.39
 4 12 4 25.8 1.43
 -4 12 -4 23.68 1.31
 -5 -12 -4 5.75 0.75
 5 -12 4 5.6 0.7
 -5 12 -4 6.94 0.8
 -5 12 -4 7.78 0.99
 5 12 4 6.42 0.85
 -6 -12 -4 35.66 1.69
 6 -12 4 37 1.66
 -6 12 -4 34.88 1.7
 -6 12 -4 37.5 1.88
 6 12 4 34.51 1.77
 -7 -12 -4 3.94 0.67
 7 -12 4 4.69 0.65
 -7 12 -4 6.3 0.9
 7 12 4 5.28 0.82
 -8 -12 -4 21.14 1.26
 8 -12 4 20.3 1.2
 -8 12 -4 18.19 1.39
 8 12 4 19.41 1.32
 9 -12 4 4.07 0.65
 9 12 4 3.97 0.82
 -9 12 -4 3.7 0.74
 10 -12 4 12.45 0.98
 10 12 4 11.01 1.21
 -10 12 -4 10.6 1.18
 11 -12 4 0.35 0.44
 11 12 4 1.2 0.69
 -11 12 -4 -0.68 0.51
 13 -13 -4 1.41 0.44
 13 13 -4 1.6 0.65
 -13 13 4 -0.06 0.58
 12 -13 -4 2.08 0.5
 -12 13 4 3.67 0.84
 12 13 -4 3.05 0.74
 11 -13 -4 1.95 0.5
 -11 13 4 1.93 0.72
 11 13 -4 1.85 0.64
 10 -13 -4 0.7 0.42
 10 13 -4 0.55 0.58
 -10 13 4 0.57 0.53
 9 -13 -4 0.57 0.44
 9 13 -4 0.83 0.6
 -9 13 4 0.71 0.59
 -8 -13 4 -0.02 0.33
 8 -13 -4 0.06 0.38
 8 13 -4 0.03 0.5
 -7 -13 4 0.11 0.35
 7 -13 -4 0.21 0.37
 7 13 -4 -0.16 0.47
 -6 -13 4 9.75 0.94
 6 -13 -4 11.01 0.95
 6 13 -4 8.22 0.93
 -5 -13 4 0.07 0.34
 5 -13 -4 0.59 0.35
 -5 13 4 0.38 0.42
 5 13 -4 0.55 0.47
 -4 -13 4 7.59 0.82
 4 -13 -4 8.47 0.85
 4 13 -4 7.46 0.87
 -4 13 4 9.36 0.94
 -3 -13 4 0.9 0.4
 3 -13 -4 0.45 0.32
 -3 13 4 0.68 0.47
 3 13 -4 0.35 0.49
 -2 -13 4 28.4 1.46
 2 -13 -4 29.33 1.43
 2 13 -4 32.04 1.62
 -2 13 4 28.79 1.52
 1 -13 -4 0.17 0.35
 -1 -13 4 0.46 0.36
 1 13 -4 0.5 0.47
 -1 13 4 0.93 0.51
 1 13 -4 0.51 0.54
 0 -13 -4 19.49 1.18
 0 -13 4 20.35 1.21
 0 13 4 20.9 1.32
 0 13 -4 19.42 1.31
 0 13 -4 19.08 1.41
 -1 -13 -4 0.62 0.4
 1 -13 4 0.13 0.36
 -1 13 -4 -0.21 0.44
 -1 13 -4 -0.39 0.46
 1 13 4 0.13 0.47
 -2 -13 -4 23.46 1.34
 2 -13 4 24.79 1.37
 2 13 4 25.62 1.47
 -2 13 -4 25.49 1.48
 -2 13 -4 29.51 1.64
 3 -13 4 0.56 0.38
 -3 -13 -4 0.55 0.45
 3 13 4 0 0.53
 -3 13 -4 0.25 0.55
 -3 13 -4 0.66 0.49
 4 -13 4 5.21 0.71
 -4 -13 -4 6.37 0.82
 4 13 4 5.32 0.86
 -4 13 -4 5.58 0.93
 -4 13 -4 5.26 0.79
 5 -13 4 0.03 0.38
 -5 -13 -4 0.08 0.36
 5 13 4 -0.35 0.43
 -5 13 -4 0.06 0.49
 -5 13 -4 -0.37 0.43
 6 -13 4 0.16 0.41
 -6 -13 -4 0.05 0.38
 -6 13 -4 1.38 0.62
 6 13 4 -0.46 0.48
 7 -13 4 -0.23 0.4
 -7 -13 -4 0.01 0.41
 7 13 4 0.01 0.57
 -7 13 -4 0.55 0.55
 8 -13 4 0.74 0.47
 -8 -13 -4 0.59 0.5
 8 13 4 0.99 0.62
 -8 13 -4 0.55 0.54
 9 -13 4 1.87 0.56
 9 13 4 3.28 0.84
 -9 13 -4 1.72 0.74
 10 -13 4 3.15 0.64
 10 13 4 3.38 0.9
 -10 13 -4 2.97 0.84
 12 -14 -4 5.73 0.73
 12 14 -4 5.8 0.94
 -12 14 4 4.81 0.92
 11 -14 -4 0.41 0.44
 -11 14 4 0.3 0.62
 11 14 -4 -0.3 0.56
 10 -14 -4 6.26 0.77
 10 14 -4 5.88 0.92
 -10 14 4 4.21 0.88
 9 -14 -4 1.13 0.51
 9 14 -4 0.94 0.62
 8 -14 -4 15.14 1.06
 8 14 -4 11.12 1.11
 7 -14 -4 1.79 0.51
 -7 -14 4 2.08 0.53
 7 14 -4 1.43 0.63
 -6 -14 4 10 0.95
 6 -14 -4 8.97 0.88
 6 14 -4 8.92 0.97
 -5 -14 4 0.77 0.42
 5 -14 -4 0.35 0.36
 -5 14 4 0.37 0.57
 5 14 -4 0.55 0.55
 -4 -14 4 5.98 0.75
 4 -14 -4 5.73 0.69
 -4 14 4 6.13 0.78
 4 14 -4 8.29 0.98
 3 -14 -4 1.33 0.46
 -3 -14 4 0.78 0.39
 3 14 -4 -0.06 0.42
 -3 14 4 0.94 0.52
 2 -14 -4 0.03 0.34
 -2 -14 4 0.91 0.43
 2 14 -4 0.4 0.53
 -2 14 4 0.11 0.5
 1 -14 -4 2.58 0.54
 -1 -14 4 1.46 0.51
 1 14 -4 1.52 0.61
 -1 14 4 2.14 0.66
 0 -14 4 -0.18 0.33
 0 -14 -4 0.49 0.4
 0 14 -4 -0.25 0.44
 0 14 4 1.56 0.57
 0 14 -4 0.69 0.59
 1 -14 4 1.63 0.53
 -1 -14 -4 2.04 0.55
 -1 14 -4 2.05 0.74
 1 14 4 2.01 0.65
 -1 14 -4 2.2 0.67
 2 -14 4 7.79 0.91
 -2 -14 -4 7.13 0.87
 -2 14 -4 7.34 0.97
 -2 14 -4 8.25 1.12
 2 14 4 8.03 1
 3 -14 4 1.69 0.52
 -3 -14 -4 2.6 0.61
 -3 14 -4 4.53 0.96
 -3 14 -4 1.34 0.63
 3 14 4 1.79 0.71
 4 -14 4 11.95 1.08
 -4 -14 -4 13 1.16
 4 14 4 12.77 1.27
 -4 14 -4 14.49 1.44
 -4 14 -4 12.67 1.17
 5 -14 4 3.51 0.66
 -5 -14 -4 2.93 0.64
 -5 14 -4 3.87 0.86
 5 14 4 3.75 0.76
 -5 14 -4 3.75 0.75
 -6 -14 -4 7.37 0.94
 6 -14 4 9.17 1.01
 6 14 4 8.24 1.06
 -6 14 -4 10.66 1.29
 -7 -14 -4 2.27 0.63
 7 -14 4 1.28 0.55
 7 14 4 1.63 0.74
 -7 14 -4 2.16 0.78
 8 -14 4 9.32 0.99
 8 14 4 5.89 0.98
 -8 14 -4 10.25 1.29
 9 -14 4 4.07 0.77
 9 14 4 4.14 0.89
 -9 14 -4 4.03 0.93
 11 -15 -4 0.44 0.49
 11 15 -4 1.67 0.74
 10 -15 -4 -0.01 0.44
 10 15 -4 -0.15 0.61
 9 -15 -4 0.16 0.42
 9 15 -4 -0.64 0.57
 8 -15 -4 0.28 0.45
 8 15 -4 0.42 0.59
 -7 -15 4 0.34 0.4
 7 -15 -4 0.73 0.43
 7 15 -4 0.6 0.55
 6 -15 -4 0.34 0.43
 -6 -15 4 2.47 0.57
 6 15 -4 1.62 0.59
 -5 -15 4 -0.15 0.4
 5 -15 -4 0.42 0.43
 5 15 -4 0.31 0.56
 4 -15 -4 4.68 0.69
 -4 -15 4 5.5 0.77
 -4 15 4 5.27 0.81
 4 15 -4 6.18 0.89
 3 -15 -4 0.88 0.43
 -3 -15 4 0.52 0.47
 3 15 -4 0.3 0.54
 -3 15 4 0.15 0.52
 2 -15 -4 7.8 0.86
 -2 -15 4 6.6 0.81
 -2 15 4 6.12 0.91
 2 15 -4 7.52 0.98
 1 -15 -4 0.75 0.46
 -1 -15 4 0.18 0.41
 1 15 -4 -0.07 0.56
 -1 15 4 -0.1 0.53
 0 -15 4 8.62 0.94
 0 -15 -4 7.78 0.83
 0 15 -4 8.26 1.1
 0 15 -4 9.02 1.05
 0 15 4 6.2 0.87
 -1 -15 -4 0.15 0.37
 1 -15 4 -0.07 0.36
 1 15 4 -0.28 0.5
 -1 15 -4 0.11 0.56
 -1 15 -4 -0.26 0.48
 -2 -15 -4 2.66 0.62
 2 -15 4 2.57 0.65
 -2 15 -4 2.5 0.71
 2 15 4 5.51 0.89
 -2 15 -4 5.08 1.01
 3 -15 4 0.6 0.48
 -3 -15 -4 -0.11 0.4
 -3 15 -4 0.38 0.65
 -3 15 -4 -0.03 0.54
 3 15 4 -0.61 0.48
 4 -15 4 0.74 0.5
 -4 -15 -4 1.01 0.5
 4 15 4 1.63 0.66
 -4 15 -4 1.1 0.74
 -4 15 -4 2.05 0.7
 5 -15 4 -0.28 0.43
 -5 -15 -4 -0.5 0.43
 -5 15 -4 -0.36 0.67
 5 15 4 1.51 0.71
 6 -15 4 0.01 0.48
 -6 -15 -4 -0.23 0.49
 6 15 4 -0.04 0.65
 -6 15 -4 -0.47 0.67
 7 -15 4 0.29 0.52
 -7 -15 -4 0.29 0.51
 -7 15 -4 0.9 0.78
 7 15 4 -0.71 0.62
 8 -15 4 -0.16 0.51
 8 15 4 0.89 0.77
 -8 15 -4 0.5 0.74
 10 -16 -4 1.33 0.54
 10 16 -4 1.67 0.77
 9 -16 -4 0.56 0.53
 9 16 -4 -0.59 0.6
 8 -16 -4 1.47 0.58
 8 16 -4 2.98 0.79
 -7 -16 4 -0.2 0.4
 7 -16 -4 0.45 0.47
 7 16 -4 0.07 0.55
 -6 -16 4 2.04 0.58
 6 -16 -4 1.67 0.54
 6 16 -4 0.87 0.59
 -5 -16 4 0.63 0.47
 5 -16 -4 0.79 0.47
 5 16 -4 0.05 0.58
 -4 -16 4 1.11 0.47
 4 -16 -4 0.9 0.48
 4 16 -4 0.84 0.56
 -4 16 4 1.54 0.73
 -3 -16 4 0.77 0.44
 3 -16 -4 0.78 0.45
 -3 16 4 0.4 0.55
 3 16 -4 1.02 0.64
 -2 -16 4 0.61 0.47
 2 -16 -4 0.46 0.46
 2 16 -4 0.26 0.59
 -2 16 4 0.79 0.57
 -1 -16 4 0.55 0.47
 1 -16 -4 0.47 0.46
 -1 16 4 0.25 0.59
 1 16 -4 1.11 0.68
 0 -16 -4 0.27 0.42
 0 -16 4 0.46 0.5
 0 16 -4 1.42 0.68
 0 16 4 -0.11 0.51
 1 -16 4 0.38 0.48
 -1 -16 -4 0.52 0.44
 1 16 4 0.93 0.58
 -1 16 -4 -0.09 0.65
 -1 16 -4 1.64 0.68
 -2 -16 -4 1.66 0.59
 2 -16 4 1.85 0.61
 -2 16 -4 1.6 0.81
 2 16 4 1.57 0.74
 -2 16 -4 1.98 0.74
 -3 -16 -4 1.27 0.6
 3 -16 4 0.63 0.49
 -3 16 -4 0.92 0.63
 -3 16 -4 2.33 0.81
 3 16 4 1.19 0.71
 4 -16 4 2.33 0.65
 -4 -16 -4 1.98 0.65
 -4 16 -4 1.88 0.75
 -4 16 -4 2.15 0.87
 4 16 4 1.55 0.79
 5 -16 4 1.25 0.59
 -5 -16 -4 1.63 0.62
 5 16 4 1.47 0.75
 -5 16 -4 2.24 0.92
 6 -16 4 5.03 0.89
 -6 -16 -4 3.94 0.8
 6 16 4 2.04 0.84
 -6 16 -4 4.88 1.08
 8 -17 -4 0.29 0.51
 8 17 -4 -0.48 0.57
 7 -17 -4 1.48 0.55
 -7 -17 4 0.25 0.47
 7 17 -4 0.47 0.66
 6 -17 -4 -0.26 0.43
 -6 -17 4 0.08 0.46
 6 17 -4 0.82 0.65
 -5 -17 4 -0.16 0.42
 5 -17 -4 0.32 0.48
 5 17 -4 0.53 0.64
 4 -17 -4 0.84 0.53
 -4 -17 4 0.21 0.42
 4 17 -4 1.89 0.75
 3 -17 -4 0.1 0.41
 -3 -17 4 0.4 0.49
 -3 17 4 0.68 0.57
 3 17 -4 1.42 0.73
 -2 -17 4 0.6 0.52
 2 -17 -4 0.47 0.44
 -2 17 4 1.87 0.65
 2 17 -4 1.96 0.76
 -1 -17 4 -0.01 0.45
 1 -17 -4 0.33 0.47
 1 17 -4 -0.22 0.51
 -1 17 4 -0.06 0.55
 0 -17 -4 1.82 0.57
 0 -17 4 1.45 0.58
 0 17 4 1.76 0.65
 0 17 -4 1.9 0.77
 -1 -17 -4 -0.13 0.47
 1 -17 4 0.77 0.52
 1 17 4 0.92 0.69
 -1 17 -4 0.25 0.63
 2 -17 4 0.84 0.51
 -2 -17 -4 0.65 0.55
 -2 17 -4 2.33 0.76
 2 17 4 0.93 0.71
 -2 17 -4 1.61 0.75
 3 -17 4 0.69 0.57
 -3 -17 -4 0.32 0.5
 -3 17 -4 1.24 0.82
 -3 17 -4 0.71 0.71
 3 17 4 1.39 0.76
 4 -17 4 0.31 0.53
 -4 -17 -4 0 0.46
 -4 17 -4 -0.53 0.91
 4 17 4 0.6 0.69
 -4 17 -4 0.5 0.71
 5 -18 -4 0.37 0.5
 -5 -18 4 0.37 0.52
 5 18 -4 0.1 0.66
 -4 -18 4 1.21 0.57
 4 -18 -4 0.2 0.49
 4 18 -4 0.71 0.69
 -3 -18 4 0.62 0.55
 3 -18 -4 0.1 0.48
 3 18 -4 0.8 0.7
 -3 18 4 -0.19 1.04
 2 -18 -4 -0.19 0.5
 -2 -18 4 -0.27 0.48
 2 18 -4 0.17 0.64
 -2 18 4 -0.6 0.61
 -1 -18 4 0.4 0.5
 1 -18 -4 -0.28 0.43
 1 18 -4 -0.39 0.66
 -1 18 4 0.32 0.6
 0 -18 -4 -0.33 0.41
 0 -18 4 0.29 0.48
 0 18 4 0.02 0.64
 0 18 -4 0.41 0.62
 1 -18 4 0.5 0.5
 -1 -18 -4 -0.5 0.48
 -1 18 -4 0.36 0.69
 1 18 4 0.41 0.7
 -2 18 -4 0.64 0.71
 19 0 -5 -0.2 0.57
 18 0 -5 0.24 0.53
 17 0 -5 0.35 0.5
 16 0 -5 -0.2 0.44
 15 0 -5 -0.24 0.34
 14 0 -5 -0.15 0.35
 13 0 -5 0.38 0.35
 13 0 -5 0.77 0.58
 12 0 -5 0.3 0.28
 12 0 -5 -0.07 0.49
 11 0 -5 0.12 0.51
 11 0 -5 0.63 0.28
 10 0 -5 0.38 0.24
 10 0 -5 0.1 0.49
 9 0 -5 0.16 0.4
 9 0 -5 0.15 0.19
 8 0 -5 0.23 0.34
 8 0 -5 -0.07 0.18
 7 0 -5 0.16 0.29
 7 0 -5 0.49 0.21
 6 0 -5 0.16 0.05
 6 0 -5 0.26 0.33
 6 0 -5 0.19 0.17
 5 0 -5 0.43 0.18
 5 0 -5 0.2 0.28
 5 0 -5 0.59 0.08
 4 0 -5 0.06 0.07
 4 0 -5 0.19 0.18
 -3 0 5 4.79 0.23
 3 0 -5 4.12 0.22
 -2 0 5 0.02 0.08
 2 0 -5 -0.03 0.08
 -1 0 5 1.79 0.19
 1 0 -5 2.13 0.2
 0 0 5 -0.02 0.09
 0 0 -5 0.09 0.1
 -1 0 -5 0.43 0.13
 1 0 5 0.36 0.11
 2 0 5 0.14 0.12
 -2 0 -5 0.12 0.12
 3 0 5 0.18 0.13
 -3 0 -5 0.14 0.12
 4 0 5 0.1 0.15
 -4 0 -5 -0.13 0.13
 -5 0 -5 1.06 0.22
 5 0 5 1.22 0.24
 6 0 5 -0.03 0.17
 -6 0 -5 0.22 0.17
 -7 0 -5 2.86 0.33
 7 0 5 1.84 0.3
 8 0 5 0.01 0.2
 -8 0 -5 -0.12 0.17
 9 0 5 6.04 0.54
 10 0 5 -0.25 0.23
 11 0 5 3.55 0.48
 12 0 5 -0.5 0.27
 13 0 5 1.91 0.44
 14 0 5 0.01 0.33
 18 -1 -5 0.54 0.49
 18 1 -5 0.03 0.57
 17 -1 -5 2.13 0.61
 17 1 -5 1.54 0.59
 16 -1 -5 1.1 0.51
 16 1 -5 1.75 0.52
 15 -1 -5 0.46 0.42
 15 1 -5 -0.19 0.34
 14 -1 -5 1.56 0.42
 14 1 -5 2.56 0.53
 13 -1 -5 0.74 0.35
 13 -1 -5 0.44 0.59
 13 1 -5 0.52 0.32
 12 -1 -5 1.19 0.62
 12 -1 -5 1.51 0.35
 12 1 -5 0.62 0.64
 12 1 -5 2.01 0.4
 11 -1 -5 0.19 0.48
 11 -1 -5 0.11 0.25
 11 1 -5 0 0.23
 11 1 -5 -0.97 0.39
 10 -1 -5 1.01 0.29
 10 -1 -5 1.71 0.57
 10 1 -5 1.55 0.62
 10 1 -5 2.12 0.39
 9 -1 -5 -0.06 0.17
 9 -1 -5 -0.28 0.32
 9 1 -5 -0.02 0.18
 9 1 -5 0.34 0.43
 8 -1 -5 -0.2 0.17
 8 -1 -5 0.3 0.39
 8 1 -5 0.13 0.05
 -8 1 5 0.13 0.09
 8 1 -5 0.35 0.4
 8 1 -5 0.19 0.17
 7 -1 -5 0.33 0.19
 7 -1 -5 0.23 0.31
 7 1 -5 0.02 0.16
 -7 1 5 0.09 0.1
 7 1 -5 0.2 0.35
 7 1 -5 0.2 0.06
 6 -1 -5 0.71 0.22
 6 -1 -5 0.37 0.06
 6 -1 -5 0.64 0.32
 6 1 -5 0.5 0.32
 6 1 -5 0.39 0.08
 6 1 -5 0.49 0.18
 5 -1 -5 0.36 0.08
 5 -1 -5 0.52 0.11
 5 -1 -5 0.72 0.32
 5 -1 -5 0.38 0.17
 5 1 -5 0.38 0.32
 5 1 -5 0.18 0.17
 5 1 -5 0.32 0.08
 4 -1 -5 2.73 0.17
 -4 -1 5 2.67 0.17
 4 1 -5 3.2 0.33
 4 1 -5 2.51 0.18
 -3 -1 5 1.75 0.16
 3 -1 -5 2.09 0.17
 -3 1 5 1.74 0.16
 3 1 -5 1.8 0.17
 2 -1 -5 0.57 0.12
 -2 -1 5 0.48 0.11
 2 1 -5 0.47 0.11
 -2 1 5 0.35 0.11
 1 -1 -5 1.61 0.19
 -1 -1 5 1.42 0.17
 -1 1 5 1.28 0.17
 1 1 -5 1.59 0.18
 0 -1 5 3.08 0.26
 0 -1 -5 2.59 0.23
 0 1 -5 3.19 0.27
 0 1 5 3.14 0.23
 -1 -1 -5 1.73 0.2
 1 -1 5 1.82 0.2
 1 1 5 1.79 0.2
 -1 1 -5 2.18 0.23
 -2 -1 -5 0.9 0.17
 2 -1 5 1.17 0.18
 -2 1 -5 0.88 0.17
 2 1 5 1.06 0.17
 3 -1 5 1.76 0.23
 -3 -1 -5 2.26 0.26
 3 1 5 1.55 0.22
 -3 1 -5 1.63 0.22
 4 -1 5 2.64 0.3
 -4 -1 -5 1.76 0.24
 -4 1 -5 2.65 0.3
 4 1 5 2.02 0.27
 5 -1 5 1.6 0.26
 -5 -1 -5 1.42 0.22
 5 1 5 2.03 0.28
 -5 1 -5 1.54 0.26
 -6 -1 -5 0.77 0.22
 6 -1 5 0.67 0.21
 6 1 5 0.85 0.22
 -6 1 -5 0.83 0.23
 7 -1 5 0.71 0.23
 -7 -1 -5 0.51 0.21
 7 1 5 0.42 0.22
 -7 1 -5 0.51 0.22
 8 -1 5 0.1 0.2
 -8 -1 -5 0.36 0.22
 8 1 5 0.4 0.24
 -8 1 -5 0.14 0.18
 9 -1 5 -0.37 0.19
 9 1 5 -0.13 0.21
 10 -1 5 0.07 0.25
 10 1 5 0.15 0.26
 11 -1 5 1.83 0.38
 11 1 5 0.86 0.33
 12 -1 5 -0.26 0.28
 12 1 5 -0.28 0.29
 13 -1 5 2.78 0.48
 13 1 5 2.1 0.47
 14 -1 5 0.36 0.36
 14 1 5 0.07 0.36
 18 -2 -5 -0.14 0.44
 18 2 -5 0.99 0.61
 17 -2 -5 0.19 0.4
 17 2 -5 0.38 0.53
 16 -2 -5 0.05 0.42
 16 2 -5 0.15 0.46
 15 -2 -5 0.79 0.42
 15 2 -5 0.76 0.45
 14 -2 -5 0.23 0.32
 14 2 -5 0.25 0.39
 13 -2 -5 0.38 0.31
 13 2 -5 0.14 0.32
 12 -2 -5 4.55 0.89
 12 -2 -5 5.27 0.59
 12 2 -5 3.95 0.55
 12 2 -5 4.3 0.87
 11 -2 -5 0.44 0.26
 11 -2 -5 1.15 0.57
 11 2 -5 0.58 0.31
 11 2 -5 0.4 0.53
 11 2 -5 0.67 0.11
 10 -2 -5 9.26 0.64
 10 -2 -5 7.96 1.02
 10 2 -5 8.56 0.33
 10 2 -5 9 1.02
 10 2 -5 8.91 0.64
 9 -2 -5 0.18 0.4
 9 -2 -5 0.85 0.27
 9 2 -5 0.3 0.38
 9 2 -5 0.25 0.24
 9 2 -5 0.55 0.1
 -9 2 5 0.46 0.15
 8 -2 -5 18.1 0.87
 8 -2 -5 18.05 1.17
 8 2 -5 18.59 1.2
 8 2 -5 19.96 0.85
 -8 2 5 19.59 0.73
 8 2 -5 20.16 0.62
 7 -2 -5 1.18 0.45
 7 -2 -5 1.02 0.09
 7 -2 -5 0.9 0.25
 7 2 -5 1.42 0.25
 7 2 -5 0.9 0.12
 -7 2 5 1.12 0.2
 7 2 -5 1.04 0.42
 6 -2 -5 14.85 0.94
 6 -2 -5 14.95 0.5
 6 -2 -5 15.27 0.71
 6 2 -5 15.38 0.67
 6 2 -5 15.62 0.52
 6 2 -5 14.06 0.92
 5 -2 -5 2.73 0.48
 -5 -2 5 2.13 0.17
 5 -2 -5 2.21 0.16
 5 -2 -5 2.09 0.3
 5 2 -5 2.31 0.18
 5 2 -5 1.91 0.25
 5 2 -5 2.36 0.45
 -4 -2 5 13.4 0.48
 4 2 -5 13.25 0.59
 4 2 -5 13.64 0.5
 4 2 -5 13.25 0.49
 -4 2 5 13.16 0.48
 -3 -2 5 0.21 0.09
 3 -2 -5 0.17 0.09
 3 2 -5 0.19 0.1
 -3 2 5 0.13 0.1
 2 -2 -5 0.82 0.14
 -2 -2 5 0.76 0.13
 2 2 -5 0.99 0.15
 -2 2 5 0.98 0.16
 -1 -2 5 0.28 0.12
 1 -2 -5 0.27 0.11
 1 2 -5 0.14 0.12
 -1 2 5 0.35 0.11
 0 -2 5 0.33 0.12
 0 -2 -5 0.71 0.15
 0 2 -5 0.56 0.15
 0 2 5 0.67 0.15
 1 -2 5 0.14 0.11
 -1 -2 -5 0.15 0.12
 -1 2 -5 0.03 0.11
 1 2 5 -0.09 0.12
 2 -2 5 0.27 0.14
 -2 -2 -5 0.2 0.12
 -2 2 -5 0.24 0.15
 2 2 5 0.2 0.13
 3 -2 5 0.63 0.17
 -3 -2 -5 0.74 0.18
 3 2 5 0.55 0.17
 -3 2 -5 0.81 0.19
 -4 -2 -5 2.25 0.27
 4 -2 5 1.78 0.24
 -4 2 -5 2.65 0.3
 4 2 5 2.88 0.32
 -5 -2 -5 1.88 0.26
 5 -2 5 2.4 0.31
 -5 2 -5 2.45 0.3
 5 2 5 1.95 0.29
 -6 -2 -5 3.48 0.38
 6 -2 5 3.07 0.34
 -6 2 -5 2.97 0.34
 6 2 5 3.7 0.39
 -7 -2 -5 8.23 0.53
 7 -2 5 7.27 0.5
 -7 2 -5 7.43 0.51
 7 2 5 7.59 0.54
 8 -2 5 2.58 0.36
 -8 -2 -5 3.55 0.41
 8 2 5 2.82 0.39
 -8 2 -5 3.4 0.4
 9 -2 5 1.05 0.3
 9 2 5 1.94 0.37
 10 -2 5 2.74 0.42
 10 2 5 2.29 0.42
 11 -2 5 3.77 0.47
 11 2 5 4.92 0.55
 12 -2 5 1.67 0.4
 12 2 5 1.32 0.4
 13 -2 5 2.42 0.47
 13 2 5 2.17 0.48
 14 -2 5 1.38 0.56
 14 -2 5 1.6 0.44
 14 2 5 0.94 0.44
 18 -3 -5 4.25 0.78
 18 3 -5 5.1 0.86
 17 -3 -5 1.44 0.57
 17 3 -5 2.51 0.68
 16 -3 -5 12.11 1.05
 16 3 -5 10.76 1.01
 15 -3 -5 1.51 0.49
 15 3 -5 1.02 0.52
 14 -3 -5 6.69 0.73
 14 3 -5 9.59 0.89
 13 -3 -5 0.26 0.32
 13 3 -5 0.27 0.33
 12 -3 -5 11.09 1.29
 12 -3 -5 11.98 0.78
 -12 3 5 11.63 0.64
 12 3 -5 10.35 0.81
 12 3 -5 12.02 0.5
 12 3 -5 14.74 1.38
 11 -3 -5 0.09 0.51
 11 -3 -5 0.08 0.23
 -11 3 5 0.16 0.18
 11 3 -5 -0.06 0.13
 11 3 -5 -0.02 0.27
 11 3 -5 0.09 0.44
 10 -3 -5 6.17 0.86
 10 -3 -5 4.25 0.48
 10 3 -5 5.88 0.84
 10 3 -5 5.64 0.33
 -10 3 5 5.76 0.43
 10 3 -5 7 0.62
 9 -3 -5 0.15 0.2
 9 -3 -5 0.8 0.46
 9 3 -5 0.26 0.4
 -9 3 5 0.31 0.18
 9 3 -5 0.25 0.13
 9 3 -5 -0.09 0.21
 8 -3 -5 1.04 0.47
 8 -3 -5 1.13 0.1
 8 -3 -5 1.47 0.31
 8 -3 -5 1.12 0.1
 8 3 -5 1.16 0.17
 8 3 -5 1.67 0.3
 8 3 -5 1.95 0.5
 -8 3 5 1.48 0.25
 7 -3 -5 0.91 0.15
 7 -3 -5 0.89 0.39
 7 -3 -5 0.98 0.26
 7 3 -5 0.72 0.39
 -7 3 5 1.2 0.25
 7 3 -5 0.92 0.15
 7 3 -5 1.21 0.24
 6 -3 -5 2.82 0.49
 6 -3 -5 2.81 0.34
 -6 -3 5 3.89 0.23
 6 -3 -5 3.29 0.24
 6 3 -5 3.74 0.24
 6 3 -5 3.2 0.53
 6 3 -5 3.04 0.31
 5 -3 -5 0.59 0.29
 5 -3 -5 0.32 0.1
 -5 -3 5 0.54 0.11
 5 -3 -5 0.57 0.2
 5 3 -5 0.15 0.25
 5 3 -5 0.51 0.13
 5 3 -5 0.21 0.14
 4 -3 -5 12.47 0.78
 -4 -3 5 10.95 0.44
 4 -3 -5 10.45 0.43
 4 3 -5 11.29 0.52
 4 3 -5 10.81 0.46
 -4 3 5 10.99 0.44
 4 3 -5 10.93 0.52
 -3 -3 5 1.84 0.2
 3 -3 -5 1.42 0.17
 -3 3 5 2.05 0.2
 3 3 -5 1.65 0.2
 3 3 -5 1.58 0.19
 -2 -3 5 20.52 0.74
 2 -3 -5 21.07 0.74
 -2 3 5 21.37 0.75
 2 3 -5 21.92 0.76
 -1 -3 5 0.74 0.14
 -1 3 5 1.21 0.19
 1 3 -5 0.96 0.16
 0 -3 5 18.19 0.69
 0 3 -5 18.18 0.7
 0 3 5 18.46 0.7
 -1 -3 -5 4.06 0.31
 1 -3 5 3.85 0.29
 1 3 5 3.79 0.33
 -1 3 -5 4.04 0.3
 2 -3 5 13.61 0.61
 -2 -3 -5 14.1 0.62
 2 3 5 14.11 0.63
 -2 3 -5 15.32 0.63
 3 -3 5 4.99 0.35
 -3 -3 -5 5.31 0.42
 -3 3 -5 5.09 0.36
 3 3 5 5.51 0.4
 4 -3 5 12.71 0.61
 -4 -3 -5 13.03 0.63
 -4 3 -5 12.86 0.62
 4 3 5 13.13 0.64
 5 -3 5 1.99 0.29
 -5 3 -5 2.78 0.32
 5 3 5 2.68 0.35
 6 -3 5 2.83 0.35
 -6 3 -5 2.7 0.34
 6 3 5 2.49 0.35
 7 -3 5 0.35 0.22
 -7 3 -5 0.4 0.22
 7 3 5 0.14 0.23
 -8 -3 -5 0.12 0.2
 8 -3 5 0.31 0.21
 8 3 5 0.06 0.24
 -8 3 -5 0.18 0.21
 9 -3 5 0.31 0.24
 9 3 5 0.19 0.26
 10 -3 5 0.1 0.25
 10 3 5 0.3 0.31
 11 -3 5 1.62 0.37
 11 3 5 0.75 0.35
 12 -3 5 1.11 0.35
 12 3 5 0.67 0.39
 13 -3 5 3.05 0.6
 13 -3 5 3.36 0.5
 13 3 5 3.38 0.56
 14 -3 5 5.53 0.81
 14 -3 5 6.37 0.67
 14 3 5 5.51 0.7
 18 -4 -5 0.41 0.56
 18 4 -5 2.27 0.75
 17 -4 -5 -0.55 0.37
 17 4 -5 -0.15 0.51
 16 -4 -5 -0.38 0.39
 16 4 -5 0.78 0.49
 15 -4 -5 1.44 0.48
 15 4 -5 1.48 0.56
 14 -4 -5 2.86 0.55
 14 4 -5 4.21 0.66
 13 -4 -5 0.9 0.37
 13 4 -5 0.59 0.39
 13 4 -5 0.65 0.23
 12 -4 -5 12.54 0.85
 12 -4 -5 12.24 1.27
 12 4 -5 13.45 1.27
 12 4 -5 11.36 0.85
 12 4 -5 13.33 0.62
 -12 4 5 13.38 0.72
 11 -4 -5 2.18 0.39
 11 -4 -5 2.83 0.66
 11 4 -5 3.03 0.32
 11 4 -5 2.14 0.62
 -11 4 5 2.3 0.34
 11 4 -5 2.71 0.46
 10 -4 -5 33.71 1.84
 10 -4 -5 36.79 1.44
 -10 4 5 34.84 1.3
 10 4 -5 35.44 1.19
 10 4 -5 37.31 1.42
 10 4 -5 34.3 1.77
 9 -4 -5 -0.21 0.21
 9 -4 -5 0.3 0.41
 9 -4 -5 0.16 0.08
 9 4 -5 -0.62 0.34
 -9 4 5 0.39 0.21
 9 4 -5 0.06 0.16
 9 4 -5 0.23 0.24
 -8 -4 5 55.88 1.72
 8 -4 -5 53.49 2.26
 8 -4 -5 58.27 1.96
 8 -4 -5 58.2 1.67
 8 4 -5 58.14 1.75
 8 4 -5 58.89 2.25
 8 4 -5 58.11 1.88
 -8 4 5 55.91 1.9
 7 -4 -5 -0.28 0.29
 7 -4 -5 0.15 0.19
 -7 -4 5 0.08 0.1
 7 -4 -5 -0.15 0.12
 7 4 -5 -0.08 0.16
 7 4 -5 0.1 0.33
 -7 4 5 -0.11 0.18
 7 4 -5 0.11 0.13
 6 -4 -5 56.58 2.15
 6 -4 -5 58.51 1.76
 6 -4 -5 56.71 1.93
 -6 -4 5 55.08 1.71
 6 4 -5 59.34 1.74
 6 4 -5 56.53 2.12
 6 4 -5 59.02 1.8
 5 -4 -5 0.94 0.3
 5 -4 -5 1.32 0.18
 -5 -4 5 1.1 0.17
 -5 4 5 1.2 0.2
 5 4 -5 1.03 0.19
 5 4 -5 1.23 0.19
 5 4 -5 0.44 0.31
 4 -4 -5 37.82 1.46
 4 -4 -5 34.91 1.12
 -4 -4 5 34.83 1.12
 4 4 -5 33.86 1.13
 -4 4 5 34.64 1.13
 4 4 -5 33.07 1.25
 4 4 -5 35.97 1.14
 3 -4 -5 7.99 0.4
 -3 -4 5 8.33 0.4
 3 4 -5 8.81 0.48
 3 4 -5 8.35 0.42
 -3 4 5 8.42 0.42
 -2 -4 5 16.02 0.62
 2 -4 -5 14.19 0.6
 -2 4 5 15.33 0.62
 2 4 -5 15.35 0.63
 2 4 -5 16.89 0.67
 1 -4 -5 0.85 0.17
 -1 -4 5 0.82 0.17
 1 4 -5 0.85 0.19
 -1 4 5 0.51 0.17
 0 -4 -5 3.78 0.29
 0 -4 5 2.76 0.27
 0 4 5 3.41 0.31
 0 4 -5 3.28 0.29
 -1 -4 -5 0.26 0.15
 1 -4 5 0.19 0.13
 -1 4 -5 0.36 0.16
 1 4 5 0.18 0.16
 2 -4 5 2.16 0.25
 -2 -4 -5 1.98 0.26
 -2 4 -5 2.03 0.27
 2 4 5 1.82 0.27
 3 -4 5 -0.2 0.12
 -3 -4 -5 -0.07 0.12
 -3 4 -5 0.11 0.14
 3 4 5 0.1 0.15
 -4 -4 -5 1.7 0.26
 4 -4 5 1.87 0.27
 -4 4 -5 1.5 0.25
 4 4 5 1.89 0.28
 5 -4 5 3.21 0.36
 -5 -4 -5 2.89 0.36
 5 4 5 2.62 0.36
 -5 4 -5 3.43 0.37
 -6 -4 -5 9.73 0.59
 6 -4 5 11.15 0.6
 6 4 5 10.72 0.65
 -6 4 -5 9.91 0.58
 -7 -4 -5 0.14 0.21
 7 -4 5 0.39 0.22
 7 4 5 0.54 0.25
 -7 4 -5 0.56 0.23
 8 -4 5 6.66 0.55
 -8 -4 -5 5.86 0.54
 -8 4 -5 6.76 0.59
 8 4 5 6.33 0.59
 9 -4 5 4.84 0.48
 9 4 5 2.54 0.43
 10 -4 5 15.47 0.82
 10 4 5 14.8 0.88
 11 -4 5 1.8 0.39
 11 4 5 1.87 0.45
 12 -4 5 9.09 0.7
 12 -4 5 8.82 0.83
 12 4 5 8.46 0.78
 13 -4 5 1.16 0.39
 13 -4 5 2.12 0.55
 13 4 5 3.15 0.57
 14 -4 5 3.25 0.52
 14 -4 5 3.24 0.62
 14 4 5 3.37 0.62
 18 -5 -5 14.64 1.29
 18 5 -5 11.34 1.19
 17 -5 -5 3.64 0.68
 17 5 -5 2.72 0.71
 16 -5 -5 23.57 1.37
 16 5 -5 23.04 1.45
 15 -5 -5 3.55 0.58
 15 5 -5 3.14 0.67
 14 -5 -5 39.62 1.7
 14 5 -5 37.81 1.43
 14 5 -5 37.18 1.72
 13 -5 -5 0.66 0.34
 13 5 -5 1.56 0.46
 13 5 -5 1.5 0.31
 12 -5 -5 24.14 1.66
 12 -5 -5 23.26 1.17
 12 5 -5 25.31 1
 12 5 -5 25.2 1.24
 -12 5 5 24.74 1.11
 11 -5 -5 0.29 0.3
 11 -5 -5 0.2 0.44
 11 -5 -5 0.67 0.11
 11 5 -5 0.42 0.33
 -11 5 5 0.35 0.26
 11 5 -5 0.18 0.24
 11 5 -5 0.49 0.49
 10 -5 -5 12.87 0.47
 10 -5 -5 12.73 1.12
 10 -5 -5 12.7 0.78
 10 5 -5 12.95 1.09
 10 5 -5 13.58 0.68
 -10 5 5 12.82 0.76
 10 5 -5 13.33 0.79
 9 -5 -5 -0.06 0.39
 9 -5 -5 0.18 0.12
 9 -5 -5 -0.29 0.23
 9 5 -5 0.26 0.24
 -9 5 5 -0.07 0.22
 9 5 -5 -0.06 0.38
 9 5 -5 -0.29 0.19
 8 -5 -5 0.43 0.27
 -8 -5 5 0.99 0.21
 8 -5 -5 0.67 0.19
 8 -5 -5 1.07 0.4
 8 5 -5 0.8 0.25
 8 5 -5 1.01 0.25
 8 5 -5 0.53 0.4
 -8 5 5 0.29 0.27
 7 -5 -5 0.78 0.27
 7 -5 -5 0.31 0.3
 7 -5 -5 0.91 0.21
 -7 -5 5 0.44 0.17
 7 5 -5 0.58 0.21
 7 5 -5 0.5 0.36
 -7 5 5 0.62 0.29
 7 5 -5 0.79 0.23
 6 -5 -5 3.82 0.56
 6 -5 -5 3.94 0.45
 -6 -5 5 3.33 0.32
 6 -5 -5 3.89 0.37
 6 5 -5 3.35 0.34
 6 5 -5 3.26 0.5
 -6 5 5 3.81 0.38
 6 5 -5 3.48 0.33
 -5 -5 5 1.45 0.22
 5 -5 -5 1.31 0.22
 5 -5 -5 0.9 0.31
 -5 5 5 1.1 0.23
 5 5 -5 1.48 0.38
 5 5 -5 0.89 0.21
 5 5 -5 0.84 0.18
 4 -5 -5 27.87 1.2
 4 -5 -5 26.6 0.94
 -4 -5 5 24.9 0.92
 4 5 -5 25.23 1.1
 -4 5 5 28.05 0.96
 4 5 -5 25.06 0.88
 4 5 -5 26.47 0.96
 3 -5 -5 1.38 0.2
 -3 -5 5 1.49 0.21
 3 5 -5 1.48 0.28
 3 5 -5 1.78 0.25
 -3 5 5 1.44 0.23
 2 -5 -5 27.34 0.98
 -2 -5 5 27.88 0.99
 2 5 -5 29.04 1.07
 -2 5 5 28.13 1.01
 2 5 -5 28.84 1.02
 -1 -5 5 4.53 0.33
 1 -5 -5 4.55 0.34
 -1 5 5 4.63 0.35
 1 5 -5 5 0.4
 1 5 -5 4.76 0.36
 0 -5 -5 60.52 1.85
 0 -5 5 56.76 1.83
 0 5 -5 57.69 1.84
 0 5 5 61.39 1.88
 -1 -5 -5 12.71 0.61
 1 -5 5 13.65 0.62
 1 5 5 13.98 0.65
 -1 5 -5 13.44 0.64
 -2 -5 -5 47.32 1.6
 2 -5 5 49.93 1.59
 -2 5 -5 47.49 1.6
 2 5 5 49.51 1.63
 3 -5 5 2.29 0.3
 -3 -5 -5 1.76 0.28
 -3 5 -5 2.12 0.31
 3 5 5 2.33 0.34
 -4 -5 -5 14.5 0.71
 4 -5 5 15.64 0.72
 4 5 5 15.79 0.75
 -4 5 -5 14.78 0.72
 5 -5 5 0.68 0.23
 -5 -5 -5 0.51 0.2
 -5 5 -5 1.08 0.26
 5 5 5 0.74 0.24
 -6 -5 -5 6.11 0.54
 6 -5 5 5.17 0.46
 6 5 5 5.56 0.55
 -6 5 -5 6.18 0.48
 7 -5 5 0.16 0.21
 -7 -5 -5 0.26 0.22
 7 5 5 0.38 0.28
 -7 5 -5 0.13 0.21
 8 -5 5 3.74 0.43
 -8 -5 -5 3.69 0.47
 8 5 5 3.74 0.5
 9 -5 5 -0.02 0.24
 9 5 5 0.54 0.34
 10 -5 5 0.66 0.29
 10 -5 5 0.36 0.29
 10 5 5 0.42 0.34
 11 -5 5 0.02 0.3
 11 -5 5 0.7 0.32
 11 5 5 0.23 0.37
 12 -5 5 3.52 0.58
 12 -5 5 3 0.47
 12 5 5 3.71 0.59
 13 -5 5 0.96 0.45
 13 -5 5 1.23 0.4
 13 5 5 0.5 0.43
 18 -6 -5 3.72 0.79
 18 6 -5 2.8 0.77
 17 -6 -5 -0.01 0.43
 17 6 -5 -0.25 0.54
 16 -6 -5 0.01 0.41
 16 6 -5 0.63 0.52
 15 -6 -5 0.63 0.45
 15 6 -5 0.5 0.48
 14 -6 -5 5.02 0.69
 14 6 -5 3.1 0.62
 14 6 -5 3.57 0.45
 13 -6 -5 2.05 0.46
 13 6 -5 3.01 0.43
 -13 6 5 2.57 0.61
 13 6 -5 3.64 0.59
 12 -6 -5 20.53 1.11
 12 6 -5 20.27 1.12
 -12 6 5 21.94 1.09
 12 6 -5 20.19 0.96
 11 -6 -5 0.94 0.16
 11 -6 -5 0.46 0.3
 11 -6 -5 0.94 0.55
 11 6 -5 0.24 0.45
 11 6 -5 0.99 0.32
 -11 6 5 0.5 0.32
 11 6 -5 0.83 0.34
 10 -6 -5 54.89 1.65
 10 -6 -5 57.62 2.4
 10 -6 -5 53.5 1.98
 10 6 -5 53.58 1.94
 10 6 -5 55.53 2.21
 -10 6 5 55.87 2.01
 10 6 -5 54.94 1.86
 9 -6 -5 0.32 0.41
 9 -6 -5 0.09 0.15
 9 -6 -5 0.37 0.28
 9 6 -5 0.33 0.28
 -9 6 5 0.5 0.29
 9 6 -5 0.02 0.37
 9 6 -5 -0.3 0.22
 8 -6 -5 84.13 2.55
 -8 -6 5 83.28 2.58
 8 -6 -5 84.05 2.72
 8 -6 -5 84.79 3.01
 8 6 -5 83.92 2.62
 -8 6 5 82.03 2.8
 8 6 -5 84.32 2.61
 8 6 -5 87.58 2.9
 7 -6 -5 5.1 0.55
 7 -6 -5 4.68 0.63
 -7 -6 5 4.78 0.42
 7 -6 -5 5.48 0.47
 7 6 -5 4.79 0.6
 -7 6 5 5.07 0.58
 7 6 -5 3.62 0.42
 7 6 -5 5.54 0.43
 -7 6 5 6.32 0.51
 6 -6 -5 100.63 3.37
 6 -6 -5 102.92 3.12
 -6 -6 5 104.84 3.08
 6 6 -5 103.83 3.02
 6 6 -5 106.48 3.12
 -6 6 5 101.53 3.13
 6 6 -5 106.86 3.33
 5 -6 -5 9.48 0.68
 5 -6 -5 9.52 0.55
 -5 -6 5 9.62 0.52
 5 6 -5 7.89 0.55
 5 6 -5 9.03 0.45
 -5 6 5 8.77 0.55
 5 6 -5 9.84 0.71
 4 -6 -5 69.06 2.09
 -4 -6 5 66.2 2.07
 4 -6 -5 66.67 2.27
 4 6 -5 63.78 1.94
 4 6 -5 66.93 2.1
 -4 6 5 67.69 2.11
 4 6 -5 68.25 2.3
 -3 -6 5 6.66 0.42
 3 -6 -5 6.7 0.53
 3 -6 -5 5.6 0.41
 3 6 -5 6.17 0.43
 -3 6 5 6.59 0.45
 3 6 -5 7.09 0.63
 -2 -6 5 23.76 0.91
 2 -6 -5 22.61 0.9
 -2 6 5 23.38 0.92
 2 6 -5 23.16 0.93
 2 6 -5 23.3 1
 1 -6 -5 8.34 0.48
 -1 -6 5 7.14 0.46
 1 6 -5 7.87 0.5
 -1 6 5 8.01 0.5
 1 6 -5 8.6 0.56
 0 -6 5 2.86 0.13
 0 -6 -5 2.67 0.32
 0 -6 5 3 0.34
 0 6 -5 2.75 0.35
 0 6 -5 3.31 0.37
 0 6 5 3.42 0.36
 1 -6 5 0.26 0.18
 -1 -6 -5 -0.02 0.16
 -1 6 -5 0.21 0.2
 1 6 5 0.02 0.2
 2 -6 5 0.8 0.22
 -2 -6 -5 0.48 0.2
 -2 6 -5 0.61 0.24
 2 6 5 0.44 0.23
 -3 -6 -5 -0.27 0.13
 3 -6 5 -0.08 0.17
 3 6 5 -0.02 0.2
 -3 6 -5 0.2 0.21
 -4 -6 -5 14.05 0.73
 4 -6 5 16.15 0.76
 -4 6 -5 15.59 0.76
 4 6 5 15.17 0.78
 5 -6 5 -0.06 0.17
 -5 -6 -5 -0.2 0.17
 -5 6 -5 0.32 0.23
 5 6 5 -0.01 0.25
 6 -6 5 16.65 0.82
 -6 -6 -5 17.3 0.84
 -6 6 -5 17 0.83
 6 6 5 17.45 0.91
 -7 -6 -5 2.55 0.4
 7 -6 5 2.59 0.36
 7 -6 5 2.34 0.36
 7 6 5 2.53 0.45
 -7 6 -5 2.89 0.4
 8 -6 5 27.35 1.17
 -8 -6 -5 29.6 1.25
 8 -6 5 30.35 1.21
 8 6 5 30.31 1.31
 9 -6 5 0.75 0.28
 9 -6 5 1.08 0.33
 9 6 5 1.03 0.39
 10 -6 5 25.33 1.17
 10 -6 5 22.37 1.1
 10 6 5 26.77 1.26
 11 -6 5 2.38 0.47
 11 -6 5 1.5 0.38
 11 6 5 1.21 0.44
 12 -6 5 14.4 0.97
 12 -6 5 15.49 0.9
 12 6 5 13.07 0.99
 13 -6 5 1.37 0.46
 13 -6 5 0.72 0.37
 13 6 5 0.59 0.49
 17 -7 -5 4.7 0.78
 17 7 -5 2.91 0.74
 16 -7 -5 33.13 1.68
 16 7 -5 33.59 1.75
 15 -7 -5 3.76 0.67
 15 7 -5 3.68 0.68
 15 7 -5 2.03 0.52
 14 -7 -5 37.57 1.68
 14 7 -5 36.47 1.7
 14 7 -5 35.48 1.44
 13 -7 -5 0.62 0.39
 13 7 -5 0.95 0.44
 13 7 -5 0.89 0.36
 -13 7 5 1.45 0.46
 12 -7 -5 33.02 1.5
 12 -7 -5 33.65 1.09
 12 7 -5 32.34 1.38
 -12 7 5 35.23 1.53
 12 7 -5 35.44 1.54
 11 -7 -5 0.04 0.4
 11 -7 -5 0.38 0.32
 11 -7 -5 -0.11 0.14
 -11 7 5 -0.02 0.31
 11 7 -5 0.48 0.35
 11 7 -5 0.04 0.3
 10 -7 -5 14.45 0.89
 10 -7 -5 15.99 1.17
 10 -7 -5 13.78 0.63
 10 7 -5 13.43 0.83
 10 7 -5 14.55 1.04
 10 7 -5 14.46 0.86
 -10 7 5 14.01 0.93
 9 -7 -5 3.29 0.36
 9 -7 -5 3.05 0.46
 9 -7 -5 3.01 0.6
 9 7 -5 3.87 0.59
 9 7 -5 2.55 0.45
 9 7 -5 3.61 0.46
 -9 7 5 3.02 0.53
 8 -7 -5 6.59 0.75
 8 -7 -5 5.92 0.59
 -8 -7 5 4.9 0.48
 8 -7 -5 5.76 0.51
 8 7 -5 6.25 0.53
 8 7 -5 6.92 0.7
 8 7 -5 5.78 0.57
 -8 7 5 6.01 0.68
 7 -7 -5 0.79 0.28
 -7 -7 5 0.97 0.26
 7 -7 -5 1.33 0.4
 7 7 -5 0.65 0.25
 7 7 -5 0.87 0.36
 -7 7 5 1.04 0.39
 7 7 -5 1.2 0.33
 -7 7 5 0.92 0.31
 6 -7 -5 13.16 0.71
 -6 -7 5 13.78 0.7
 6 -7 -5 13.03 0.86
 6 7 -5 13.47 0.83
 -6 7 5 12.38 0.74
 6 7 -5 12.74 0.6
 6 7 -5 12.71 0.74
 -5 -7 5 0.44 0.21
 5 -7 -5 0.66 0.3
 5 -7 -5 0.82 0.27
 5 7 -5 0.57 0.17
 -5 7 5 0.8 0.28
 5 7 -5 0.8 0.31
 5 7 -5 0.49 0.25
 4 -7 -5 29.13 1.1
 -4 -7 5 26.65 1.06
 4 -7 -5 25.46 1.15
 4 7 -5 25.76 0.87
 4 7 -5 26.91 1.28
 -4 7 5 26.97 1.1
 4 7 -5 27.38 1.11
 4 7 -5 29.1 1.22
 3 -7 -5 2.69 0.34
 -3 -7 5 1.56 0.27
 3 -7 -5 2.18 0.36
 3 7 -5 1.35 0.38
 3 7 -5 1.58 0.3
 -3 7 5 2.56 0.35
 2 -7 -5 67.46 2.12
 -2 -7 5 67.68 2.12
 2 7 -5 65.81 2.26
 -2 7 5 65.17 2.13
 2 7 -5 64 2.12
 1 -7 -5 18.64 0.83
 -1 -7 5 18.03 0.82
 1 7 -5 19.99 0.93
 1 7 -5 19.11 0.87
 -1 7 5 17.34 0.84
 0 -7 5 91.6 2.8
 0 -7 -5 89.52 2.81
 0 7 -5 95.92 2.94
 0 7 5 92.99 2.84
 0 7 -5 90.25 2.82
 1 -7 5 3.24 0.37
 1 -7 5 3.15 0.17
 -1 -7 -5 3.37 0.38
 1 7 5 3.51 0.43
 -1 7 -5 2.43 0.38
 -1 7 -5 3.57 0.4
 2 -7 5 54.12 1.58
 2 -7 5 55.76 1.83
 -2 -7 -5 54.86 1.85
 -2 7 -5 52.81 1.83
 2 7 5 54.41 1.88
 3 -7 5 6.73 0.51
 -3 -7 -5 7.11 0.54
 3 -7 5 6.87 0.36
 -3 7 -5 7.33 0.55
 3 7 5 6.89 0.61
 -4 -7 -5 54.77 1.9
 4 -7 5 53.71 1.85
 4 -7 5 54.92 1.68
 -4 7 -5 54.47 1.87
 4 7 5 55.33 1.93
 -5 -7 -5 0.51 0.27
 5 -7 5 1.03 0.22
 5 -7 5 0.56 0.25
 5 7 5 1.55 0.38
 -5 7 -5 0.66 0.28
 6 -7 5 19.93 0.83
 -6 -7 -5 20.13 0.98
 6 -7 5 19.99 0.93
 6 7 5 18.93 1
 -6 7 -5 19.34 0.93
 -7 -7 -5 0.97 0.32
 7 -7 5 1.62 0.33
 7 -7 5 1.71 0.31
 7 7 5 0.67 0.32
 -7 7 -5 1.41 0.34
 8 -7 5 0.69 0.29
 8 -7 5 0.84 0.27
 -8 -7 -5 1.07 0.33
 8 7 5 1.05 0.39
 9 -7 5 -0.1 0.23
 9 -7 5 0.26 0.28
 9 7 5 0.12 0.35
 10 -7 5 0.82 0.33
 10 -7 5 0.46 0.29
 10 7 5 0.51 0.43
 11 -7 5 -0.14 0.29
 11 -7 5 -0.03 0.3
 11 7 5 -0.31 0.41
 12 -7 5 5.42 0.62
 12 -7 5 5.1 0.66
 12 7 5 4.73 0.74
 13 -7 5 0.15 0.35
 13 7 5 -0.28 0.47
 17 -8 -5 0.46 0.52
 17 8 -5 0.6 0.59
 16 -8 -5 0.18 0.46
 16 8 -5 -0.46 0.5
 15 -8 -5 2.06 0.55
 15 8 -5 1.64 0.44
 15 8 -5 1.19 0.55
 14 -8 -5 9.63 0.93
 14 8 -5 8.14 0.73
 14 8 -5 10.26 0.99
 13 -8 -5 7.46 0.8
 -13 8 5 6.4 0.76
 13 8 -5 6.35 0.75
 13 8 -5 4.64 0.62
 12 -8 -5 27.77 1.35
 12 -8 -5 28.8 0.99
 12 8 -5 26.68 1.27
 -12 8 5 25.13 1.37
 12 8 -5 26.23 1.35
 11 -8 -5 0.6 0.22
 11 -8 -5 1.06 0.4
 11 8 -5 1.32 0.43
 11 8 -5 1.23 0.41
 -11 8 5 0.88 0.41
 10 -8 -5 90.24 3.22
 10 -8 -5 89.12 2.92
 10 -8 -5 89.91 2.66
 10 8 -5 85.86 2.86
 10 8 -5 86.57 2.84
 -10 8 5 82.79 3
 10 8 -5 83.77 2.95
 9 -8 -5 0.36 0.3
 9 -8 -5 0.55 0.41
 9 -8 -5 -0.15 0.21
 -9 8 5 0.27 0.37
 9 8 -5 0.37 0.35
 9 8 -5 -0.03 0.34
 9 8 -5 0.39 0.29
 8 -8 -5 103.62 3.44
 -8 -8 5 97.92 3.14
 8 -8 -5 100.02 3.13
 8 8 -5 98.53 3.2
 8 8 -5 100.96 3.22
 8 8 -5 99.5 3.07
 -8 8 5 104.69 3.43
 -7 -8 5 2.02 0.37
 7 -8 -5 2.1 0.47
 7 -8 -5 3.06 0.44
 7 8 -5 2.49 0.44
 7 8 -5 2.4 0.45
 7 8 -5 2.74 0.35
 -7 8 5 3.21 0.46
 -6 -8 5 94.17 3.01
 6 -8 -5 98.65 3.18
 6 -8 -5 98.15 3.04
 6 8 -5 96.09 2.83
 -6 8 5 97.79 3.06
 6 8 -5 94.15 3.06
 6 8 -5 97.55 3.02
 5 -8 -5 3.73 0.49
 5 -8 -5 2.6 0.41
 -5 -8 5 3.42 0.45
 -5 8 5 3 0.46
 5 8 -5 3.19 0.43
 5 8 -5 3.25 0.28
 5 8 -5 3.72 0.49
 4 -8 -5 84.23 2.79
 -4 -8 5 90.69 2.8
 4 -8 -5 89.45 2.83
 4 8 -5 87.15 2.82
 -4 8 5 84.7 2.81
 4 8 -5 95.12 3.09
 4 8 -5 83.34 2.47
 4 8 -5 95.74 2.83
 3 -8 -5 12.41 0.69
 -3 -8 5 11.38 0.67
 3 -8 -5 11.25 0.68
 -3 8 5 11.15 0.69
 3 8 -5 10.24 0.83
 3 8 -5 12.69 0.75
 -2 -8 5 27.27 1.11
 2 -8 -5 27.69 1.13
 2 -8 -5 28.09 1.13
 2 8 -5 26.13 1.25
 -2 8 5 24.61 1.13
 2 8 -5 28.35 1.16
 1 -8 -5 5.02 0.49
 -1 -8 5 3.81 0.42
 1 8 -5 4.2 0.55
 -1 8 5 3.54 0.46
 1 8 -5 3 0.41
 0 -8 -5 4.64 0.47
 0 -8 5 4.41 0.44
 0 8 -5 4.74 0.55
 0 8 5 4.59 0.48
 0 8 -5 4.01 0.46
 -1 -8 -5 2.33 0.38
 1 -8 5 2.59 0.4
 -1 8 -5 2.41 0.42
 1 8 5 2.32 0.42
 -1 8 -5 2.68 0.42
 -2 -8 -5 1.79 0.36
 2 -8 5 1.45 0.29
 -2 8 -5 0.71 0.28
 -2 8 -5 1.44 0.4
 2 8 5 1.27 0.37
 -3 -8 -5 0.03 0.23
 3 -8 5 -0.09 0.12
 3 -8 5 -0.11 0.2
 -3 8 -5 0.51 0.27
 3 8 5 -0.06 0.27
 -3 8 -5 -0.15 0.25
 -4 -8 -5 19.63 0.96
 4 -8 5 20.23 0.76
 4 -8 5 19.47 0.94
 -4 8 -5 20.07 0.97
 4 8 5 19.58 1.01
 -5 -8 -5 0.06 0.24
 5 -8 5 0.18 0.23
 5 -8 5 0.27 0.17
 -5 8 -5 -0.03 0.23
 5 8 5 0.01 0.29
 6 -8 5 33.26 1.36
 -6 -8 -5 35.09 1.43
 6 -8 5 33.99 1.25
 6 8 5 34.52 1.48
 -6 8 -5 32.91 1.36
 -7 -8 -5 0.17 0.26
 7 -8 5 -0.12 0.23
 7 -8 5 -0.22 0.24
 -7 8 -5 0.35 0.28
 7 8 5 0.01 0.3
 -8 -8 -5 44.54 1.77
 8 -8 5 45.27 1.7
 8 8 5 44.9 1.83
 9 -8 5 0.93 0.32
 9 8 5 0.48 0.41
 10 -8 5 34.83 1.45
 10 8 5 33.28 1.61
 11 -8 5 -0.23 0.3
 11 8 5 0.1 0.45
 12 -8 5 17.6 1.02
 12 8 5 17.06 1.25
 16 -9 -5 35.68 1.76
 16 9 -5 33.5 1.77
 15 -9 -5 2.89 0.65
 15 9 -5 3.14 0.57
 15 9 -5 3.61 0.71
 14 -9 -5 57.69 2.26
 14 9 -5 51.99 2.06
 14 9 -5 54.28 2.24
 13 -9 -5 0.88 0.45
 13 9 -5 1.46 0.51
 13 9 -5 1.46 0.47
 -13 9 5 0.18 0.44
 12 -9 -5 49.14 1.98
 12 -9 -5 50.25 1.63
 12 9 -5 47.08 1.93
 -12 9 5 49.37 2.09
 12 9 -5 47.78 1.92
 11 -9 -5 3.1 0.38
 11 -9 -5 2.66 0.53
 11 9 -5 1.93 0.51
 11 9 -5 2.77 0.49
 -11 9 5 3.76 0.66
 10 -9 -5 24.89 1.43
 10 -9 -5 24.14 1.26
 10 -9 -5 27.45 1.1
 10 9 -5 22.41 1.15
 10 9 -5 24.86 1.26
 -10 9 5 24.97 1.4
 9 -9 -5 3.71 0.61
 9 -9 -5 2.62 0.41
 -9 9 5 2.79 0.61
 9 9 -5 2.72 0.48
 9 9 -5 3.18 0.44
 9 9 -5 2.31 0.5
 8 -9 -5 1.66 0.45
 -8 -9 5 1.7 0.38
 8 -9 -5 1.39 0.37
 8 9 -5 1.7 0.39
 8 9 -5 1.03 0.46
 8 9 -5 1.55 0.34
 -8 9 5 1.76 0.51
 -7 -9 5 1.03 0.33
 7 -9 -5 1.7 0.43
 7 -9 -5 1.67 0.38
 7 9 -5 1.38 0.43
 7 9 -5 1.82 0.37
 7 9 -5 1.4 0.28
 6 -9 -5 2.3 0.42
 -6 -9 5 2.84 0.42
 6 -9 -5 2.34 0.45
 6 9 -5 2.32 0.38
 -6 9 5 2.18 0.44
 6 9 -5 2.03 0.28
 6 9 -5 2.49 0.5
 -5 -9 5 0.31 0.26
 5 -9 -5 0.3 0.27
 5 -9 -5 0.16 0.24
 5 9 -5 -0.23 0.23
 -5 9 5 -0.07 0.29
 5 9 -5 0.27 0.35
 5 9 -5 0.3 0.16
 4 -9 -5 40.2 1.59
 -4 -9 5 39.8 1.55
 4 -9 -5 39.6 1.53
 4 9 -5 40.88 1.61
 4 9 -5 44.25 1.5
 -4 9 5 40.37 1.62
 -3 -9 5 1.87 0.37
 3 -9 -5 1.71 0.33
 3 -9 -5 2.04 0.37
 3 9 -5 2.36 0.46
 3 9 -5 1.57 0.5
 -3 9 5 2.25 0.43
 2 -9 -5 78.76 2.63
 2 -9 -5 83.08 2.57
 -2 -9 5 80.59 2.64
 2 9 -5 86.47 2.71
 2 9 -5 78.72 2.85
 -2 9 5 79.31 2.67
 1 -9 -5 6.75 0.63
 -1 -9 5 8.2 0.67
 -1 9 5 7.59 0.68
 1 9 -5 7.02 0.74
 1 9 -5 7.72 0.7
 0 -9 -5 111.16 3.44
 0 -9 5 112.54 3.44
 0 9 -5 106.55 3.44
 0 9 5 114.21 3.49
 0 9 -5 108.61 3.58
 1 -9 5 18.06 0.91
 -1 -9 -5 17.66 0.93
 -1 9 -5 18.61 1.06
 -1 9 -5 17.93 0.95
 1 9 5 19.39 1.02
 2 -9 5 87.12 2.86
 -2 -9 -5 91.53 2.9
 2 9 5 89.13 2.93
 -2 9 -5 90.49 3.01
 -2 9 -5 86.8 2.88
 -3 -9 -5 2.75 0.46
 3 -9 5 1.8 0.37
 -3 9 -5 2.42 0.51
 3 9 5 2.74 0.49
 -3 9 -5 2.45 0.45
 4 -9 5 47.96 1.79
 -4 -9 -5 49.28 1.82
 4 9 5 46.46 1.84
 -4 9 -5 49.87 1.82
 -4 9 -5 48.4 1.95
 5 -9 5 1.77 0.39
 -5 -9 -5 1.94 0.39
 -5 9 -5 1.23 0.37
 -5 9 -5 2.29 0.52
 5 9 5 1.78 0.43
 -6 -9 -5 21.19 1.12
 6 -9 5 22.79 1.09
 6 9 5 22.03 1.2
 -6 9 -5 21.33 1.08
 -7 -9 -5 -0.21 0.29
 7 -9 5 -0.17 0.26
 7 9 5 0.13 0.41
 -8 -9 -5 2.88 0.5
 8 -9 5 4.2 0.54
 8 9 5 2.36 0.54
 9 -9 5 0.36 0.32
 9 9 5 0.26 0.45
 10 -9 5 1.59 0.43
 10 9 5 1.93 0.6
 11 -9 5 1.4 0.41
 11 9 5 1.41 0.55
 12 -9 5 6.92 0.74
 12 9 5 7.19 0.95
 16 -10 -5 2.05 0.63
 16 10 -5 0.78 0.58
 16 10 -5 0.22 0.58
 15 -10 -5 1.79 0.59
 15 10 -5 2.19 0.63
 15 10 -5 2.03 0.57
 14 -10 -5 4.81 0.74
 14 10 -5 4.69 0.73
 14 10 -5 4.31 0.67
 13 -10 -5 3.9 0.66
 13 10 -5 4.02 0.66
 13 10 -5 4.04 0.64
 -13 10 5 4.01 0.78
 12 -10 -5 56.05 2.13
 12 -10 -5 51.62 1.76
 -12 10 5 48.35 2.21
 12 10 -5 49.38 2.02
 12 10 -5 50.63 2.05
 11 -10 -5 2.1 0.38
 11 -10 -5 1.16 0.44
 -11 10 5 1.45 0.54
 11 10 -5 1.43 0.5
 11 10 -5 1.49 0.45
 10 -10 -5 50.86 1.82
 -10 10 5 46.43 2.13
 10 10 -5 51.24 1.86
 10 10 -5 48.33 1.97
 9 -10 -5 0.24 0.3
 9 -10 -5 0.53 0.39
 -9 10 5 0.83 0.45
 9 10 -5 0.04 0.42
 9 10 -5 0.07 0.28
 8 -10 -5 105.5 3.53
 8 -10 -5 113.33 3.45
 -8 -10 5 104.47 3.43
 8 10 -5 104.25 3.51
 7 -10 -5 7.67 0.7
 7 -10 -5 9.18 0.74
 -7 -10 5 6.59 0.68
 7 10 -5 8.57 0.82
 6 -10 -5 100.71 3.22
 6 -10 -5 103.73 3.25
 -6 -10 5 94.06 3.21
 -6 10 5 103.45 3.27
 6 10 -5 97.86 3.3
 -5 -10 5 9.74 0.73
 5 -10 -5 8.61 0.68
 5 -10 -5 7.5 0.61
 -5 10 5 9.55 0.8
 5 10 -5 7.7 0.77
 -4 -10 5 112.57 3.59
 4 -10 -5 114.96 3.46
 4 -10 -5 114.97 3.61
 -4 10 5 109.74 3.62
 4 10 -5 114.81 3.65
 3 -10 -5 19.75 1.02
 3 -10 -5 17.89 0.85
 -3 -10 5 18.02 0.99
 3 10 -5 18.58 1.21
 -3 10 5 17.68 1.04
 3 10 -5 18.17 1.07
 2 -10 -5 58.79 2.16
 2 -10 -5 62.05 2
 -2 -10 5 62.85 2.19
 2 10 -5 62.34 2.25
 2 10 -5 61.04 2.41
 -2 10 5 60.92 2.22
 1 -10 -5 6.34 0.49
 -1 -10 5 7.82 0.71
 1 -10 -5 6.26 0.62
 1 10 -5 7.56 0.85
 1 10 -5 7.77 0.76
 -1 10 5 5.74 0.64
 0 -10 5 13.87 0.83
 0 -10 -5 13.71 0.84
 0 10 -5 13.31 0.87
 0 10 5 12.09 0.89
 0 10 -5 13.3 0.98
 1 -10 5 9.44 0.72
 -1 -10 -5 10.43 0.75
 -1 10 -5 11.51 0.85
 -1 10 -5 10.56 0.9
 1 10 5 9.05 0.83
 2 -10 5 2.16 0.42
 -2 -10 -5 1.89 0.42
 -2 10 -5 1.83 0.46
 -2 10 -5 2.21 0.54
 2 10 5 1.48 0.47
 -3 -10 -5 0.06 0.27
 3 -10 5 -0.19 0.27
 3 10 5 0.39 0.4
 -3 10 -5 -0.48 0.32
 -3 10 -5 0.57 0.36
 4 -10 5 14.36 0.88
 -4 -10 -5 14.98 0.93
 4 10 5 13.21 0.98
 -4 10 -5 13.93 0.92
 -4 10 -5 16.12 1.07
 5 -10 5 0.13 0.29
 -5 -10 -5 1.34 0.41
 -5 10 -5 0.68 0.37
 -5 10 -5 1.09 0.48
 5 10 5 0.82 0.44
 -6 -10 -5 64.33 2.39
 6 -10 5 68.52 2.36
 -6 10 -5 67.25 2.55
 -6 10 -5 62.04 2.33
 6 10 5 66 2.46
 7 -10 5 -0.26 0.3
 -7 -10 -5 0.42 0.35
 7 10 5 -0.07 0.4
 -7 10 -5 -0.21 0.37
 -8 -10 -5 54.36 2.12
 8 -10 5 53.29 2.03
 -8 10 -5 53.29 2.28
 8 10 5 51.54 2.14
 9 -10 5 0.25 0.37
 9 10 5 0.93 0.53
 -9 10 -5 0.09 0.47
 10 -10 5 42.19 1.78
 -10 10 -5 43.1 2.08
 10 10 5 46.09 2.03
 11 -10 5 0.13 0.36
 -11 10 -5 -0.2 0.48
 11 10 5 -0.17 0.53
 15 -11 -5 0.9 0.52
 15 11 -5 1.56 0.57
 14 -11 -5 47.67 2.09
 14 11 -5 46.84 2
 13 -11 -5 0.42 0.29
 13 -11 -5 1.42 0.53
 -13 11 5 0.53 0.54
 13 11 -5 0.66 0.51
 12 -11 -5 36.57 1.46
 12 -11 -5 39.45 1.78
 -12 11 5 36.82 1.91
 12 11 -5 37.64 1.75
 11 -11 -5 -0.31 0.28
 -11 11 5 -0.27 0.44
 11 11 -5 0.53 0.47
 10 -11 -5 19.69 1.06
 -10 11 5 21.13 1.38
 10 11 -5 20.8 1.26
 9 -11 -5 2.87 0.5
 -9 11 5 2.3 0.64
 9 11 -5 2.62 0.59
 -8 -11 5 0.82 0.34
 8 -11 -5 1.3 0.4
 8 11 -5 0.82 0.5
 7 -11 -5 4.7 0.61
 7 -11 -5 3.84 0.53
 -7 -11 5 4.17 0.58
 7 11 -5 3.05 0.6
 -6 -11 5 3.21 0.53
 6 -11 -5 2.9 0.45
 6 -11 -5 2.59 0.47
 6 11 -5 2.98 0.59
 -6 11 5 3.5 0.59
 5 -11 -5 -0.1 0.24
 5 -11 -5 0.17 0.29
 -5 -11 5 0.32 0.32
 -5 11 5 0.79 0.39
 5 11 -5 -0.49 0.38
 -4 -11 5 38.8 1.62
 4 -11 -5 36.69 1.57
 4 11 -5 37.22 1.67
 -4 11 5 38.9 1.65
 -3 -11 5 1.35 0.42
 3 -11 -5 1.93 0.43
 -3 11 5 2.32 0.51
 3 11 -5 1.25 0.48
 3 11 -5 1.31 0.6
 -2 -11 5 103.93 3.41
 2 -11 -5 106.64 3.44
 -2 11 5 103.03 3.46
 2 11 -5 106.03 3.48
 2 11 -5 102.5 3.66
 -1 -11 5 9.78 0.77
 1 -11 -5 9.09 0.82
 -1 11 5 8.6 0.83
 1 11 -5 8.1 0.92
 1 11 -5 8.33 0.85
 0 -11 -5 99.07 3.32
 0 -11 5 101.38 3.33
 0 11 5 104.31 3.4
 0 11 -5 99.07 3.53
 0 11 -5 101.49 3.38
 1 -11 5 0.69 0.32
 -1 -11 -5 1.1 0.37
 -1 11 -5 0.74 0.39
 -1 11 -5 1.59 0.5
 1 11 5 1.3 0.48
 -2 -11 -5 104.68 3.46
 2 -11 5 108.69 3.47
 2 11 5 106.94 3.54
 -2 11 -5 105.88 3.49
 -2 11 -5 101.52 3.61
 3 -11 5 10.12 0.86
 -3 -11 -5 10.37 0.89
 -3 11 -5 9.14 0.87
 3 11 5 9.46 0.92
 -3 11 -5 10.92 1.04
 4 -11 5 74.87 2.61
 -4 -11 -5 74.11 2.64
 -4 11 -5 70.24 2.6
 4 11 5 72.81 2.7
 -4 11 -5 74.29 2.79
 -5 -11 -5 7.99 0.83
 5 -11 5 7.71 0.77
 -5 11 -5 8.03 0.94
 -5 11 -5 6.38 0.76
 5 11 5 6.14 0.8
 6 -11 5 24.94 1.28
 -6 -11 -5 27.38 1.37
 -6 11 -5 27.05 1.52
 -6 11 -5 25.28 1.31
 6 11 5 22.91 1.38
 -7 -11 -5 2.59 0.56
 7 -11 5 2.27 0.49
 -7 11 -5 2.84 0.66
 7 11 5 1.73 0.6
 -8 -11 -5 3.29 0.63
 8 -11 5 2.62 0.54
 -8 11 -5 3.2 0.74
 8 11 5 2.93 0.69
 9 -11 5 2.51 0.54
 9 11 5 3.61 0.76
 -9 11 -5 2.28 0.71
 10 -11 5 1.65 0.49
 -10 11 -5 0.79 0.59
 10 11 5 2.06 0.69
 11 -11 5 1.03 0.46
 -11 11 -5 1.57 0.71
 11 11 5 0.97 0.68
 14 -12 -5 7.7 0.93
 14 12 -5 6.07 0.83
 13 -12 -5 3.93 0.51
 13 12 -5 4.81 0.78
 -13 12 5 3.43 0.82
 12 -12 -5 28.67 1.31
 12 12 -5 28.93 1.57
 -12 12 5 28.2 1.7
 11 -12 -5 2.22 0.48
 11 12 -5 2.13 0.62
 -11 12 5 2.58 0.67
 10 -12 -5 56.82 2.21
 10 12 -5 57.41 2.4
 -10 12 5 67.03 2.66
 9 -12 -5 0.03 0.35
 9 12 -5 0.67 0.53
 8 -12 -5 94.8 3.21
 -8 -12 5 96.24 3.25
 8 12 -5 94.63 3.32
 7 -12 -5 0.38 0.36
 -7 -12 5 0.54 0.35
 7 12 -5 0.27 0.48
 6 -12 -5 100.2 3.26
 -6 -12 5 97.06 3.28
 6 12 -5 93.11 3.32
 5 -12 -5 32.17 1.45
 -5 -12 5 31.03 1.48
 -5 12 5 32.16 1.52
 5 12 -5 30.52 1.52
 4 -12 -5 79.9 2.79
 -4 -12 5 78.04 2.82
 4 12 -5 84.15 2.94
 -4 12 5 81.32 2.86
 -3 -12 5 10.53 0.93
 3 -12 -5 11.03 0.85
 3 12 -5 10.56 0.98
 -3 12 5 12.66 1.03
 2 -12 -5 33.62 1.54
 -2 -12 5 32.42 1.52
 -2 12 5 33.68 1.63
 2 12 -5 35.17 1.8
 2 12 -5 32.85 1.61
 1 -12 -5 7.18 0.75
 -1 -12 5 7.91 0.77
 -1 12 5 7.26 0.81
 1 12 -5 10.23 1.08
 1 12 -5 7.91 0.83
 0 -12 5 11.52 0.97
 0 -12 -5 11.16 0.85
 0 12 -5 11.11 0.99
 0 12 -5 12.59 1.18
 0 12 5 10.25 0.97
 -1 -12 -5 1.79 0.44
 1 -12 5 1.9 0.47
 -1 12 -5 2.37 0.68
 1 12 5 1.49 0.48
 -1 12 -5 1.8 0.55
 -2 -12 -5 6.58 0.74
 2 -12 5 6.29 0.71
 -2 12 -5 6.73 0.88
 -2 12 -5 6.67 0.78
 2 12 5 9.69 0.99
 -3 -12 -5 1.99 0.47
 3 -12 5 2.39 0.51
 -3 12 -5 1.93 0.57
 3 12 5 2.38 0.59
 -3 12 -5 3.01 0.68
 4 -12 5 30.24 1.47
 -4 -12 -5 28.36 1.47
 -4 12 -5 28.89 1.61
 4 12 5 28.39 1.56
 -4 12 -5 32.05 1.55
 -5 -12 -5 -0.1 0.37
 5 -12 5 -0.29 0.34
 5 12 5 -0.24 0.48
 -5 12 -5 0.32 0.51
 -5 12 -5 0.02 0.43
 -6 -12 -5 62.05 2.42
 6 -12 5 61.72 2.37
 -6 12 -5 63.46 2.62
 6 12 5 58.16 2.48
 -6 12 -5 58.19 3.03
 -7 -12 -5 0.63 0.45
 7 -12 5 0.86 0.45
 7 12 5 0.5 0.56
 -7 12 -5 0.73 0.54
 -8 -12 -5 71.24 2.73
 8 -12 5 73.87 2.68
 -8 12 -5 67.2 2.87
 8 12 5 69.24 2.81
 9 -12 5 0.46 0.46
 9 12 5 0.56 0.65
 -9 12 -5 0.88 0.63
 10 -12 5 46.54 2.03
 -10 12 -5 49.43 2.35
 10 12 5 44.43 2.23
 13 -13 -5 -0.33 0.34
 -13 13 5 -0.35 0.62
 13 13 -5 0.65 0.61
 12 -13 -5 30.96 1.45
 -12 13 5 30.74 1.83
 12 13 -5 32.65 1.69
 11 -13 -5 1.33 0.45
 11 13 -5 1.61 0.65
 10 -13 -5 14.31 1.01
 10 13 -5 15.7 1.21
 9 -13 -5 2.35 0.54
 9 13 -5 1.93 0.64
 -8 -13 5 6.3 1.14
 8 -13 -5 5.44 0.7
 8 13 -5 4.18 0.78
 7 -13 -5 3.81 0.62
 -7 -13 5 2.23 0.51
 7 13 -5 3.55 0.72
 6 -13 -5 4.29 0.61
 -6 -13 5 5.03 0.67
 6 13 -5 4.23 0.69
 -5 -13 5 1.06 0.41
 5 -13 -5 1.24 0.45
 -5 13 5 0.33 0.46
 5 13 -5 1.03 0.49
 4 -13 -5 22 1.22
 -4 -13 5 23.56 1.29
 -4 13 5 24.58 1.36
 4 13 -5 21.64 1.32
 -3 -13 5 0.87 0.42
 3 -13 -5 0.1 0.28
 -3 13 5 1.18 0.46
 3 13 -5 0.42 0.5
 2 -13 -5 69.7 2.57
 -2 -13 5 64.22 2.56
 -2 13 5 70.35 2.65
 2 13 -5 75.58 2.93
 2 13 -5 69.81 2.69
 -1 -13 5 -0.34 0.29
 1 -13 -5 0.39 0.35
 1 13 -5 0.08 0.47
 1 13 -5 0.37 0.56
 -1 13 5 0.22 0.42
 0 -13 -5 121.46 3.89
 0 -13 5 110.99 3.82
 0 13 5 115.7 3.93
 0 13 -5 111.74 4.09
 0 13 -5 114.1 3.91
 1 -13 5 6.06 0.77
 -1 -13 -5 4.63 0.67
 -1 13 -5 4.28 0.73
 1 13 5 7.19 0.9
 -1 13 -5 6.48 0.91
 -2 -13 -5 136.94 4.48
 2 -13 5 136.71 4.47
 -2 13 -5 132.34 4.69
 -2 13 -5 138.41 4.53
 2 13 5 142.26 4.59
 -3 -13 -5 4.65 0.74
 3 -13 5 2.77 0.59
 -3 13 -5 4.44 0.75
 3 13 5 3.73 0.76
 -3 13 -5 3.27 0.73
 -4 -13 -5 92.73 3.25
 4 -13 5 87.06 3.18
 -4 13 -5 88.3 3.43
 -4 13 -5 85.93 3.22
 4 13 5 93.84 3.35
 -5 -13 -5 4.98 0.77
 5 -13 5 3.07 0.62
 5 13 5 4.73 0.84
 -5 13 -5 2.58 0.64
 -5 13 -5 4.06 0.82
 -6 -13 -5 27.91 1.55
 6 -13 5 27.52 1.5
 6 13 5 27.16 1.65
 -6 13 -5 27.06 1.66
 7 -13 5 1.49 0.55
 -7 -13 -5 1.56 0.57
 7 13 5 1.97 0.73
 -7 13 -5 0.98 0.66
 -8 -13 -5 2.82 1.02
 8 -13 5 3.21 0.66
 8 13 5 2.74 0.81
 -8 13 -5 2.51 0.75
 9 -13 5 2.7 0.64
 9 13 5 2.18 0.78
 -9 13 -5 2.35 0.75
 -13 14 5 4.64 1.39
 12 -14 -5 22.26 1.3
 12 14 -5 26.85 1.57
 11 -14 -5 3.23 0.6
 11 14 -5 2.21 0.72
 10 -14 -5 40.83 1.8
 10 14 -5 38.07 1.92
 9 -14 -5 -0.06 0.4
 9 14 -5 0.19 0.56
 8 -14 -5 95.84 3.27
 8 14 -5 91.58 3.4
 -7 -14 5 3.86 0.64
 7 -14 -5 3.83 0.63
 7 14 -5 3.13 0.68
 6 -14 -5 99.28 3.44
 -6 -14 5 105.28 3.53
 6 14 -5 99.71 3.59
 -5 -14 5 1.19 0.46
 5 -14 -5 0.62 0.37
 5 14 -5 0.72 0.49
 4 -14 -5 71.35 2.68
 -4 -14 5 75.83 2.78
 4 14 -5 70.42 2.81
 -4 14 5 78.81 2.82
 3 -14 -5 14.58 1.02
 -3 -14 5 14.68 1.08
 -3 14 5 14.13 1.18
 3 14 -5 16.3 1.25
 -2 -14 5 41.58 1.87
 2 -14 -5 40.9 1.81
 -2 14 5 38.94 1.88
 2 14 -5 42.92 1.95
 -1 -14 5 12.38 0.96
 1 -14 -5 12.86 1.1
 1 14 -5 12.69 1.33
 1 14 -5 9.75 1.01
 -1 14 5 13.75 1.22
 0 -14 -5 7.82 0.86
 0 -14 5 11.83 1.06
 0 14 -5 10.7 1.18
 0 14 5 8.78 1
 0 14 -5 9.08 1.04
 -1 -14 -5 8.78 0.91
 1 -14 5 8.43 0.9
 -1 14 -5 9.71 1.04
 -1 14 -5 8.21 1.1
 1 14 5 10.62 1.09
 2 -14 5 1.31 0.52
 -2 -14 -5 1.23 0.52
 -2 14 -5 3.47 0.85
 -2 14 -5 2.26 0.71
 2 14 5 1.95 0.7
 3 -14 5 2.72 0.61
 -3 -14 -5 2.94 0.65
 3 14 5 2.97 0.76
 -3 14 -5 1.73 0.66
 -3 14 -5 3.2 0.84
 -4 -14 -5 29.73 1.61
 4 -14 5 29.15 1.58
 4 14 5 29.92 1.72
 -4 14 -5 25.28 1.74
 -4 14 -5 25.88 1.6
 -5 -14 -5 2.29 0.64
 5 -14 5 1.58 0.59
 -5 14 -5 2.18 0.76
 5 14 5 1.74 0.74
 -5 14 -5 2.38 0.68
 6 -14 5 43.79 2.09
 -6 -14 -5 49.22 2.2
 6 14 5 46.59 2.28
 -6 14 -5 46.97 2.41
 -7 -14 -5 1.9 0.63
 7 -14 5 0.82 0.52
 7 14 5 1.21 0.74
 -7 14 -5 2.18 0.78
 8 -14 5 66.55 2.67
 8 14 5 57.41 2.73
 -8 14 -5 64.28 2.93
 11 -15 -5 1.31 0.53
 11 15 -5 1.31 0.71
 10 -15 -5 11.14 1.01
 10 15 -5 11.36 1.2
 9 -15 -5 1.45 0.52
 9 15 -5 2.4 0.75
 8 -15 -5 0.89 0.47
 8 15 -5 0.77 0.59
 -7 -15 5 2.55 0.57
 7 -15 -5 3.38 0.62
 7 15 -5 3.2 0.77
 6 -15 -5 1.39 0.48
 -6 -15 5 1.47 0.48
 6 15 -5 3.04 0.71
 5 -15 -5 2.04 0.54
 -5 -15 5 1.47 0.53
 5 15 -5 1.49 0.66
 4 -15 -5 23.28 1.31
 -4 -15 5 25.51 1.44
 -4 15 5 25.69 1.47
 4 15 -5 24.09 1.54
 -3 -15 5 0.47 0.46
 3 -15 -5 0.04 0.36
 -3 15 5 0.79 0.54
 3 15 -5 0.91 0.6
 -2 -15 5 64.97 2.56
 2 -15 -5 63.61 2.5
 -2 15 5 65.67 2.62
 2 15 -5 63.93 2.68
 -1 -15 5 1.61 0.54
 1 -15 -5 0.47 0.38
 -1 15 5 0.42 0.49
 1 15 -5 0.13 0.58
 0 -15 -5 99.35 3.51
 0 -15 5 98.62 3.54
 0 15 -5 98.45 3.83
 0 15 5 97.94 3.59
 0 15 -5 99.12 3.64
 -1 -15 -5 8.25 0.93
 1 -15 5 6.82 0.83
 -1 15 -5 5.02 0.84
 1 15 5 5.91 0.91
 -1 15 -5 6.2 1.07
 -2 -15 -5 119.51 4.05
 2 -15 5 105.67 3.95
 2 15 5 119.44 4.14
 -2 15 -5 114.4 4.32
 -2 15 -5 114.97 4.09
 -3 -15 -5 2.87 0.69
 3 -15 5 2.25 0.65
 -3 15 -5 2.14 0.73
 3 15 5 3.81 0.87
 -3 15 -5 3.66 0.94
 4 -15 5 69.82 2.81
 -4 -15 -5 72.18 2.85
 -4 15 -5 67.65 3.04
 4 15 5 67.51 2.91
 -4 15 -5 66.84 2.85
 -5 -15 -5 6.23 0.94
 5 -15 5 4.5 0.8
 5 15 5 4.48 0.96
 -5 15 -5 3.89 0.92
 -6 -15 -5 19.14 1.45
 6 -15 5 18.53 1.39
 -6 15 -5 21.02 1.89
 6 15 5 19.26 1.62
 7 -15 5 4.56 0.8
 -7 -15 -5 3.68 0.8
 7 15 5 2.28 0.83
 -7 15 -5 3.06 0.94
 10 -16 -5 32.56 1.68
 10 16 -5 32.8 1.87
 9 -16 -5 0.92 0.49
 9 16 -5 0.81 0.68
 8 -16 -5 49.22 2.16
 8 16 -5 54.43 2.4
 7 -16 -5 0.09 0.45
 -7 -16 5 0.51 0.47
 7 16 -5 0.89 0.64
 -6 -16 5 67.83 2.74
 6 -16 -5 70.75 2.7
 6 16 -5 73.22 2.91
 -5 -16 5 4.24 0.69
 5 -16 -5 5.17 0.76
 5 16 -5 5.32 0.91
 -4 -16 5 57.1 2.33
 4 -16 -5 51.67 2.2
 4 16 -5 49.02 2.36
 -3 -16 5 12.3 1.15
 3 -16 -5 9.86 0.96
 3 16 -5 13.82 1.34
 -3 16 5 9.43 0.99
 2 -16 -5 36.65 1.79
 -2 -16 5 42.36 1.95
 2 16 -5 39.74 2.05
 -2 16 5 39.22 1.97
 -1 -16 5 8.89 1.02
 1 -16 -5 8.09 0.93
 -1 16 5 8.71 1.06
 1 16 -5 9.85 1.16
 0 -16 -5 3.59 0.65
 0 -16 5 4.79 0.78
 0 16 -5 5.18 0.89
 0 16 5 2.65 0.74
 0 16 -5 4.7 1.01
 1 -16 5 6.31 0.91
 -1 -16 -5 7.89 0.94
 -1 16 -5 8.35 1.1
 1 16 5 7.6 1.03
 -1 16 -5 7.31 1.11
 2 -16 5 4.42 0.8
 -2 -16 -5 4.08 0.74
 2 16 5 3.16 0.79
 -2 16 -5 4.49 0.92
 -2 16 -5 3.65 0.96
 3 -16 5 7.27 0.96
 -3 -16 -5 6.43 0.87
 -3 16 -5 7.41 1.07
 -3 16 -5 7.54 1.18
 3 16 5 8.12 1.06
 4 -16 5 20.31 1.48
 -4 -16 -5 23.23 1.55
 4 16 5 22.15 1.66
 -4 16 -5 21.45 1.61
 -4 16 -5 23.68 1.83
 5 -16 5 7.68 1.01
 -5 -16 -5 5.14 0.88
 5 16 5 4.13 0.97
 -5 16 -5 7.04 1.18
 8 -17 -5 0.64 0.53
 8 17 -5 0.49 0.63
 -7 -17 5 4.72 1.18
 7 -17 -5 4.63 0.74
 7 17 -5 1.96 0.76
 -6 -17 5 2.37 0.62
 6 -17 -5 1.83 0.58
 6 17 -5 0.84 0.69
 5 -17 -5 2.98 0.65
 -5 -17 5 4.11 0.78
 5 17 -5 4.88 0.98
 4 -17 -5 24.9 1.45
 -4 -17 5 23.84 1.48
 4 17 -5 22.04 1.53
 -3 -17 5 0.91 0.48
 3 -17 -5 1.24 0.53
 -3 17 5 1.5 0.66
 3 17 -5 1.12 0.72
 -2 -17 5 43.7 2.09
 2 -17 -5 47.57 2.11
 -2 17 5 48.93 2.24
 2 17 -5 45.3 2.23
 -1 -17 5 -0.11 0.46
 1 -17 -5 0.59 0.5
 1 17 -5 0.09 0.64
 -1 17 5 -0.01 0.61
 0 -17 5 101.8 3.72
 0 -17 -5 98.48 3.64
 0 17 5 99.64 3.77
 0 17 -5 106.34 3.85
 -1 -17 -5 0.64 0.56
 1 -17 5 1.17 0.54
 1 17 5 3.11 0.87
 -1 17 -5 1.21 0.8
 -1 17 -5 1.25 0.7
 -2 -17 -5 82.28 3.29
 2 -17 5 91.8 3.44
 2 17 5 89.1 3.47
 -2 17 -5 90.93 3.78
 -2 17 -5 82.1 3.43
 -3 -17 -5 1.11 0.63
 3 -17 5 1.46 0.6
 -3 17 -5 0.08 0.67
 -3 17 -5 0.86 0.83
 3 17 5 1.57 0.81
 5 18 -5 0.54 0.69
 -4 -18 5 46.58 2.19
 4 -18 -5 46.99 2.14
 4 18 -5 45.48 2.31
 -3 -18 5 6.39 0.93
 3 -18 -5 6.52 0.88
 3 18 -5 5.93 1.04
 -2 -18 5 16.83 1.3
 2 -18 -5 16.52 1.27
 2 18 -5 14.19 1.41
 -2 18 5 16.45 1.44
 -1 -18 5 6.36 0.95
 1 -18 -5 7.17 0.95
 -1 18 5 7.48 1.08
 1 18 -5 6.26 1.09
 0 -18 5 5.12 0.83
 0 -18 -5 3.87 0.81
 0 18 -5 3.35 0.84
 0 18 5 3.08 0.87
 19 0 -6 0.09 0.56
 18 0 -6 30.47 1.72
 17 0 -6 -0.22 0.44
 16 0 -6 20.24 1.23
 15 0 -6 -0.14 0.35
 14 0 -6 0.84 0.72
 14 0 -6 0.97 0.39
 13 0 -6 0.56 0.6
 13 0 -6 0.12 0.31
 12 0 -6 31.72 1.34
 12 0 -6 26.62 1.77
 11 0 -6 0.12 0.46
 11 0 -6 0 0.25
 10 0 -6 172.95 4.83
 10 0 -6 151.5 5.35
 9 0 -6 -0.04 0.35
 -9 0 6 0.17 0.08
 9 0 -6 -0.22 0.19
 8 0 -6 362.92 9.58
 8 0 -6 325.41 10.04
 7 0 -6 0.01 0.19
 7 0 -6 0.14 0.06
 7 0 -6 0.26 0.32
 6 0 -6 496.46 14.48
 6 0 -6 526.95 14.08
 6 0 -6 526.94 13.88
 5 0 -6 0.13 0.08
 5 0 -6 0.47 0.23
 4 0 -6 1000 26.89
 -4 0 6 990.62 26.9
 -3 0 6 0.22 0.1
 3 0 -6 0.16 0.1
 2 0 -6 583.37 15.98
 -2 0 6 591.38 16.1
 1 0 -6 0.08 0.11
 -1 0 6 0.07 0.1
 0 0 -6 98.29 2.82
 0 0 6 97.82 2.82
 -1 0 -6 0.19 0.13
 1 0 6 0 0.12
 2 0 6 0.32 0.16
 -2 0 -6 0.26 0.15
 -3 0 -6 0.05 0.15
 3 0 6 -0.02 0.15
 4 0 6 1.64 0.25
 -4 0 -6 2.17 0.29
 5 0 6 -0.09 0.16
 -5 0 -6 -0.01 0.16
 6 0 6 55.72 1.86
 -6 0 -6 57.05 1.86
 -7 0 -6 -0.29 0.16
 7 0 6 0 0.21
 8 0 6 72.77 2.38
 -8 0 -6 74.73 2.39
 9 0 6 0 0.25
 10 0 6 57.01 2.01
 11 0 6 0.82 0.34
 12 0 6 61.48 2.21
 13 0 6 0.66 0.39
 19 -1 -6 -0.4 0.54
 19 1 -6 -0.82 0.52
 18 -1 -6 28.36 1.64
 18 1 -6 26.76 1.58
 17 -1 -6 -0.25 0.45
 17 1 -6 0.09 0.44
 16 -1 -6 60.19 2.38
 16 1 -6 61.86 2.45
 15 -1 -6 0.11 0.33
 15 1 -6 0 0.38
 14 -1 -6 161.84 4.91
 14 -1 -6 153.27 5.63
 14 1 -6 166.49 4.95
 14 1 -6 150.54 5.56
 13 -1 -6 0.75 0.32
 13 -1 -6 -0.4 0.49
 13 1 -6 -0.01 0.54
 13 1 -6 0.46 0.32
 12 -1 -6 227.39 6.6
 12 -1 -6 223 7.31
 12 1 -6 237.2 6.62
 12 1 -6 217.24 7.24
 11 -1 -6 1.48 0.68
 11 -1 -6 1.27 0.34
 11 1 -6 1.28 0.34
 -11 1 6 2.11 0.23
 11 1 -6 0.33 0.54
 10 -1 -6 197.21 6.36
 10 -1 -6 196.38 5.73
 10 1 -6 197.92 5.71
 -10 1 6 206.37 5.42
 10 1 -6 186.75 6.28
 9 -1 -6 0.02 0.21
 9 -1 -6 -0.08 0.33
 9 1 -6 0.09 0.38
 9 1 -6 0.36 0.24
 -9 1 6 0.12 0.12
 8 -1 -6 76.32 2.37
 8 -1 -6 71.56 2.78
 8 1 -6 66.26 2.74
 8 1 -6 73.49 2.33
 8 1 -6 74.53 1.99
 7 -1 -6 0.78 0.26
 7 -1 -6 1.07 0.1
 7 -1 -6 1.42 0.46
 7 1 -6 1.57 0.29
 7 1 -6 1.32 0.46
 7 1 -6 1 0.11
 6 -1 -6 9.8 0.61
 6 -1 -6 11.13 0.38
 6 -1 -6 9.83 0.81
 6 1 -6 10.5 0.39
 6 1 -6 10.63 0.58
 6 1 -6 10.71 0.88
 5 -1 -6 1.65 0.41
 5 -1 -6 2.78 0.18
 -5 -1 6 2.7 0.18
 5 1 -6 2.73 0.15
 5 1 -6 1.5 0.28
 5 1 -6 2.31 0.19
 -4 -1 6 77.98 2.22
 4 -1 -6 77.85 2.21
 4 1 -6 77.63 2.22
 -4 1 6 79.85 2.22
 3 -1 -6 4.62 0.27
 -3 -1 6 5.36 0.28
 3 1 -6 5.49 0.29
 -3 1 6 5.31 0.28
 2 -1 -6 257.32 6.97
 -2 -1 6 257.47 6.97
 -2 1 6 253.54 6.97
 2 1 -6 257.98 6.98
 -1 -1 6 2.06 0.21
 1 -1 -6 1.95 0.21
 -1 1 6 2.2 0.21
 1 1 -6 2.2 0.22
 0 -1 6 310.88 8.63
 0 -1 -6 322.24 8.64
 0 1 6 320.29 8.64
 1 -1 6 3.58 0.29
 -1 -1 -6 4.09 0.3
 -1 1 -6 3.88 0.3
 1 1 6 3.92 0.3
 2 -1 6 217.05 6.07
 -2 -1 -6 224.86 6.09
 -2 1 -6 224.9 6.09
 2 1 6 210.02 6.07
 3 -1 6 9.53 0.5
 -3 -1 -6 8.75 0.5
 3 1 6 9.15 0.5
 -3 1 -6 9.6 0.51
 -4 -1 -6 165.28 4.73
 4 -1 6 171.08 4.74
 -4 1 -6 167.28 4.74
 4 1 6 162.57 4.73
 -5 -1 -6 0.63 0.2
 5 -1 6 0.78 0.22
 5 1 6 0.46 0.21
 -5 1 -6 0.47 0.19
 6 -1 6 79.07 2.43
 -6 -1 -6 77.3 2.43
 -6 1 -6 77.56 2.43
 6 1 6 76.14 2.43
 7 -1 6 -0.09 0.19
 -7 -1 -6 0.06 0.2
 -7 1 -6 0.27 0.21
 7 1 6 -0.03 0.22
 8 -1 6 36.69 1.35
 -8 -1 -6 35.04 1.34
 -8 1 -6 34.37 1.32
 8 1 6 32.92 1.34
 9 -1 6 2.18 0.38
 9 1 6 1.72 0.36
 10 -1 6 1.74 0.39
 10 1 6 0.92 0.34
 11 -1 6 -0.15 0.27
 11 1 6 0.61 0.35
 12 -1 6 0.85 0.38
 12 1 6 1.48 0.44
 13 -1 6 0.26 0.37
 13 1 6 0.21 0.36
 19 -2 -6 0.75 0.63
 19 2 -6 -0.1 0.58
 18 -2 -6 27.33 1.61
 18 2 -6 27.06 1.65
 17 -2 -6 0.94 0.55
 17 2 -6 -0.33 0.5
 16 -2 -6 7.5 0.86
 16 2 -6 5.56 0.81
 15 -2 -6 0.24 0.39
 15 2 -6 -0.02 0.36
 14 -2 -6 -0.18 0.56
 14 -2 -6 0 0.29
 14 2 -6 0.58 0.4
 14 2 -6 0.27 0.71
 13 -2 -6 0.13 0.28
 13 -2 -6 0.46 0.62
 13 2 -6 0.09 0.3
 13 2 -6 -0.07 0.61
 12 -2 -6 38.85 2.14
 12 -2 -6 41.2 1.63
 12 2 -6 40.2 1.63
 12 2 -6 39.69 2.1
 11 -2 -6 1.01 0.35
 11 -2 -6 0.17 0.47
 11 2 -6 1.41 0.36
 -11 2 6 1.45 0.23
 11 2 -6 0.93 0.53
 10 -2 -6 115.2 4.17
 10 -2 -6 115.2 3.6
 10 2 -6 119.03 3.16
 10 2 -6 111.29 4.1
 -10 2 6 120.41 3.36
 10 2 -6 117.14 3.58
 9 -2 -6 1.37 0.52
 9 -2 -6 1.66 0.35
 -9 2 6 1.22 0.22
 9 2 -6 0.58 0.5
 9 2 -6 1.17 0.13
 9 2 -6 1.35 0.29
 8 -2 -6 492.61 13.94
 8 -2 -6 492.59 13.42
 8 2 -6 446.61 13.82
 8 2 -6 497.73 13.37
 8 2 -6 515.21 13.06
 7 -2 -6 0.35 0.08
 7 -2 -6 0.47 0.24
 7 -2 -6 0.52 0.36
 7 2 -6 0.49 0.39
 7 2 -6 0.27 0.1
 7 2 -6 0.52 0.2
 -6 -2 6 583.57 15.03
 6 -2 -6 551.89 15.45
 6 -2 -6 556.4 14.87
 6 -2 -6 556.87 15.1
 6 2 -6 573.53 14.8
 6 2 -6 560.13 15.01
 6 2 -6 493.19 15.4
 -5 -2 6 21.22 0.69
 5 -2 -6 19.45 1.1
 5 2 -6 20.46 0.69
 5 2 -6 21.25 0.71
 5 2 -6 18.7 0.84
 -5 2 6 20.21 0.68
 4 -2 -6 564.16 15.43
 -4 -2 6 555.16 15.25
 4 2 -6 580.28 15.37
 -4 2 6 582.14 15.26
 3 -2 -6 3.11 0.23
 -3 -2 6 3.58 0.24
 3 2 -6 3.08 0.24
 -3 2 6 3.36 0.25
 -2 -2 6 277.01 7.5
 2 -2 -6 270.57 7.5
 -2 2 6 278.47 7.51
 2 2 -6 277.41 7.51
 -1 -2 6 1.11 0.18
 1 -2 -6 0.65 0.15
 1 2 -6 1.02 0.18
 -1 2 6 0.38 0.14
 0 -2 6 127.49 3.66
 0 -2 -6 129.66 3.66
 0 2 6 128.02 3.66
 0 2 -6 131.32 3.67
 -1 -2 -6 1.89 0.25
 1 -2 6 1.24 0.21
 -1 2 -6 1.33 0.22
 1 2 6 2.22 0.27
 -2 -2 -6 6.05 0.41
 2 -2 6 5.42 0.38
 2 2 6 6.5 0.42
 -2 2 -6 6.43 0.42
 -3 -2 -6 0.36 0.17
 3 -2 6 0.28 0.17
 -3 2 -6 0.33 0.18
 3 2 6 0.33 0.18
 -4 -2 -6 9.2 0.54
 4 -2 6 9.49 0.53
 4 2 6 9.19 0.55
 -4 2 -6 9.73 0.56
 -5 -2 -6 0.1 0.18
 5 -2 6 0.09 0.18
 5 2 6 0.2 0.2
 -5 2 -6 0.25 0.2
 6 -2 6 56.95 1.91
 -6 -2 -6 60.98 1.94
 6 2 6 57.24 1.93
 -6 2 -6 57.36 1.91
 7 -2 6 0.14 0.22
 -7 -2 -6 0.25 0.21
 7 2 6 -0.01 0.22
 -7 2 -6 0.17 0.2
 -8 -2 -6 57.13 1.92
 8 -2 6 55.76 1.9
 -8 2 -6 53.98 1.88
 8 2 6 55.72 1.93
 9 -2 6 3.19 0.44
 9 2 6 2.41 0.42
 10 -2 6 63.67 2.21
 10 2 6 66.31 2.26
 11 -2 6 0.89 0.33
 11 2 6 0.49 0.35
 12 -2 6 57.55 2.09
 12 2 6 57.18 2.13
 13 -2 6 0.27 0.35
 13 2 6 0.06 0.37
 18 -3 -6 20.37 1.43
 18 3 -6 21.87 1.5
 17 -3 -6 0.9 0.47
 17 3 -6 2.03 0.67
 16 -3 -6 78.3 2.92
 16 3 -6 82.95 3.02
 15 -3 -6 -0.24 0.34
 15 3 -6 0.54 0.45
 14 -3 -6 97.73 4.02
 14 -3 -6 93.48 3.29
 14 3 -6 103.03 3.38
 14 3 -6 104.58 3.96
 13 -3 -6 0.74 0.36
 13 -3 -6 1.66 0.68
 13 3 -6 0.49 0.56
 13 3 -6 1.32 0.42
 12 -3 -6 195.13 6.33
 12 -3 -6 183.2 5.62
 12 3 -6 187.74 5.62
 12 3 -6 193.45 5.13
 12 3 -6 188.84 6.19
 11 -3 -6 2.16 0.4
 11 -3 -6 3.29 0.77
 11 3 -6 2.11 0.6
 11 3 -6 3.13 0.23
 11 3 -6 3.15 0.45
 -11 3 6 3.42 0.37
 10 -3 -6 180.88 5.42
 10 -3 -6 176.15 5.93
 -10 3 6 189.57 5.25
 10 3 -6 188.28 5.39
 10 3 -6 186.4 5.93
 10 3 -6 185.95 5.03
 9 -3 -6 0.53 0.27
 9 -3 -6 0.8 0.49
 9 3 -6 0.65 0.14
 9 3 -6 1.05 0.29
 9 3 -6 0.82 0.5
 -9 3 6 0.5 0.22
 8 -3 -6 94.84 3.38
 8 -3 -6 86.15 2.64
 8 -3 -6 97.1 2.98
 8 3 -6 97.63 3.39
 8 3 -6 97.96 2.9
 8 3 -6 96.66 2.66
 7 -3 -6 5.8 0.31
 7 -3 -6 5.94 0.75
 -7 -3 6 5.95 0.29
 7 -3 -6 5.32 0.5
 7 3 -6 5.21 0.73
 7 3 -6 5.58 0.31
 7 3 -6 6.21 0.46
 6 -3 -6 4.34 0.26
 -6 -3 6 4.45 0.26
 6 -3 -6 4.55 0.46
 6 -3 -6 4.91 0.63
 6 3 -6 5.91 0.3
 6 3 -6 4.96 0.42
 6 3 -6 3.56 0.55
 -5 -3 6 0.39 0.11
 5 -3 -6 0.58 0.3
 5 -3 -6 0.38 0.11
 5 3 -6 0.29 0.13
 5 3 -6 0.44 0.18
 -5 3 6 0.32 0.11
 5 3 -6 0.45 0.19
 4 -3 -6 83.86 2.37
 -4 -3 6 82.39 2.37
 4 3 -6 84.19 2.39
 -4 3 6 83.22 2.38
 4 3 -6 80.07 2.39
 3 -3 -6 0.02 0.1
 -3 -3 6 0.05 0.1
 3 3 -6 0.18 0.12
 -3 3 6 0.18 0.12
 -2 -3 6 166.66 4.72
 -2 3 6 174.45 4.74
 2 3 -6 169.3 4.73
 -1 -3 6 5.2 0.34
 1 -3 -6 5.05 0.34
 -1 3 6 5.31 0.35
 1 3 -6 4 0.32
 0 -3 -6 327.99 9.07
 0 -3 6 330.56 9.07
 0 3 6 335.56 9.09
 0 3 -6 337.56 9.08
 -1 -3 -6 6.92 0.43
 1 -3 6 7.73 0.43
 1 3 6 6.62 0.43
 -1 3 -6 7.06 0.42
 -2 -3 -6 327.03 8.99
 2 -3 6 328.71 8.98
 -2 3 -6 335.38 9
 2 3 6 320.5 8.99
 -3 -3 -6 0.34 0.18
 3 -3 6 0.23 0.16
 -3 3 -6 0.41 0.2
 3 3 6 0.05 0.19
 4 -3 6 191.64 5.37
 -4 -3 -6 187.92 5.37
 4 3 6 190.61 5.39
 -4 3 -6 188.21 5.37
 5 -3 6 4.49 0.42
 -5 -3 -6 4.27 0.44
 -5 3 -6 5.2 0.47
 5 3 6 4.95 0.48
 6 -3 6 73.91 2.35
 6 3 6 73.2 2.38
 -6 3 -6 75.32 2.36
 7 -3 6 0.72 0.25
 -7 3 -6 0.27 0.23
 7 3 6 0.57 0.27
 8 -3 6 21.87 0.99
 -8 3 -6 21.98 1
 8 3 6 22.11 1.04
 9 -3 6 1.07 0.32
 9 3 6 1.07 0.35
 10 -3 6 1.55 0.37
 10 3 6 1.47 0.41
 11 -3 6 -0.07 0.27
 11 3 6 0.02 0.33
 12 -3 6 2.06 0.43
 12 3 6 1.62 0.46
 13 -3 6 0.9 0.39
 13 3 6 0.39 0.4
 18 -4 -6 31.85 1.76
 18 4 -6 34.09 1.86
 17 -4 -6 0.84 0.55
 17 4 -6 0.31 0.55
 16 -4 -6 13.5 1.15
 16 4 -6 14.6 1.15
 15 -4 -6 0.27 0.4
 15 4 -6 0.52 0.47
 14 -4 -6 0.65 0.37
 14 -4 -6 0.23 0.59
 14 4 -6 0.91 0.42
 13 -4 -6 1.7 0.45
 13 -4 -6 0.88 0.67
 13 4 -6 1.29 0.21
 13 4 -6 1.22 0.43
 13 4 -6 1.23 0.67
 12 -4 -6 30.8 1.4
 12 -4 -6 30.67 1.88
 12 4 -6 30.75 1.39
 12 4 -6 32.59 1.82
 12 4 -6 30.85 1.02
 11 -4 -6 10.6 1.14
 11 -4 -6 10.26 0.74
 11 4 -6 11.47 0.51
 11 4 -6 11.19 0.78
 11 4 -6 11.97 1.19
 -11 4 6 11.21 0.68
 10 -4 -6 114.01 3.6
 10 -4 -6 119.43 4.11
 -10 4 6 113.48 3.49
 10 4 -6 112.71 3.26
 10 4 -6 119.23 3.57
 10 4 -6 117.54 4.04
 9 -4 -6 4.64 0.26
 9 -4 -6 4.28 0.5
 9 -4 -6 5.58 0.77
 9 4 -6 4.86 0.73
 9 4 -6 4.2 0.47
 -9 4 6 4.22 0.47
 9 4 -6 4.64 0.32
 8 -4 -6 346.9 9.9
 -8 -4 6 367.11 9.88
 8 -4 -6 362.9 10.59
 8 -4 -6 367.88 10.2
 8 4 -6 372.06 9.9
 8 4 -6 372.5 10.09
 8 4 -6 375.14 10.59
 -7 -4 6 3.95 0.27
 7 -4 -6 4.27 0.65
 7 -4 -6 4.04 0.33
 7 -4 -6 4 0.49
 7 4 -6 3.48 0.38
 7 4 -6 3.84 0.61
 7 4 -6 4.08 0.31
 -6 -4 6 425.84 11.61
 6 -4 -6 425.11 11.62
 6 -4 -6 443.2 12.18
 6 4 -6 436.79 11.74
 -6 4 6 422.97 11.62
 6 4 -6 434.57 11.63
 6 4 -6 431.4 12.19
 5 -4 -6 0.21 0.11
 5 -4 -6 0.48 0.28
 -5 -4 6 0.1 0.11
 5 4 -6 0.03 0.19
 -5 4 6 -0.11 0.12
 5 4 -6 0.03 0.17
 5 4 -6 0.09 0.13
 4 -4 -6 458.12 12.5
 -4 -4 6 453.25 12.51
 -4 4 6 466.48 12.52
 4 4 -6 475.29 12.6
 4 4 -6 469.61 12.53
 -3 -4 6 4.73 0.31
 3 -4 -6 5.21 0.33
 3 4 -6 5.17 0.35
 -3 4 6 4.39 0.32
 3 4 -6 5.49 0.37
 2 -4 -6 263.28 7.26
 -2 -4 6 261.37 7.26
 2 4 -6 263.61 7.28
 -2 4 6 272.29 7.28
 1 -4 -6 6.92 0.4
 -1 -4 6 6.09 0.38
 1 4 -6 7.29 0.41
 0 -4 6 95.99 2.79
 0 -4 -6 95.12 2.79
 0 4 -6 96.03 2.8
 0 4 6 91.85 2.8
 1 -4 6 0.74 0.19
 -1 -4 -6 0.87 0.2
 1 4 6 0.68 0.2
 -1 4 -6 0.32 0.17
 -2 -4 -6 4.98 0.43
 2 -4 6 4.97 0.39
 2 4 6 4.19 0.41
 -2 4 -6 4.78 0.42
 3 -4 6 9.36 0.53
 -3 -4 -6 8.48 0.53
 -3 4 -6 8.94 0.54
 3 4 6 8.33 0.55
 4 -4 6 3.64 0.38
 -4 -4 -6 4.88 0.46
 -4 4 -6 5.7 0.48
 4 4 6 5.38 0.48
 -5 -4 -6 8.5 0.55
 5 -4 6 7.27 0.5
 -5 4 -6 8.93 0.56
 5 4 6 8.83 0.59
 -6 -4 -6 31.09 1.21
 6 -4 6 31.25 1.2
 6 4 6 30.21 1.23
 -6 4 -6 29.75 1.19
 -7 -4 -6 2.16 0.35
 7 -4 6 3.26 0.42
 -7 4 -6 2.33 0.37
 7 4 6 2.71 0.39
 8 -4 6 51.78 1.79
 -8 -4 -6 50.96 1.82
 8 4 6 48.95 1.83
 9 -4 6 1.09 0.31
 9 4 6 0.52 0.33
 10 -4 6 73.39 2.46
 10 4 6 74.7 2.54
 11 -4 6 0.29 0.31
 11 4 6 0.12 0.35
 12 -4 6 53.36 2.01
 12 4 6 56.32 2.12
 13 -4 6 1.13 0.49
 13 -4 6 2.23 0.49
 13 4 6 1.12 0.48
 18 -5 -6 19.71 1.41
 18 5 -6 20.6 1.49
 17 -5 -6 1.06 0.58
 17 5 -6 0.3 0.54
 16 -5 -6 72.08 2.75
 16 5 -6 73.05 2.81
 15 -5 -6 5.7 0.75
 15 5 -6 5.85 0.81
 14 -5 -6 131.54 4.22
 14 5 -6 129.87 4.23
 13 -5 -6 2.5 0.77
 13 -5 -6 2.27 0.49
 13 5 -6 2.29 0.53
 13 5 -6 3.16 0.34
 13 5 -6 2.62 0.78
 12 -5 -6 115.13 4.27
 12 -5 -6 112.38 3.71
 12 5 -6 120.42 4.14
 -12 5 6 119.35 3.76
 12 5 -6 116.62 3.72
 12 5 -6 116.31 3.36
 11 -5 -6 0.07 0.27
 11 -5 -6 0.11 0.09
 11 -5 -6 0.32 0.48
 -11 5 6 0.27 0.28
 11 5 -6 0.01 0.3
 11 5 -6 -0.04 0.19
 11 5 -6 -0.48 0.46
 10 -5 -6 117.62 4.14
 10 -5 -6 116.25 3.69
 10 -5 -6 120.77 3.27
 -10 5 6 113.71 3.65
 10 5 -6 119.12 3.64
 10 5 -6 120.07 3.42
 10 5 -6 122.47 4.07
 9 -5 -6 0.29 0.29
 9 -5 -6 0.14 0.15
 9 -5 -6 -0.08 0.42
 9 5 -6 0.15 0.24
 -9 5 6 -0.11 0.25
 9 5 -6 0.21 0.42
 9 5 -6 0.09 0.19
 8 -5 -6 60.76 2.39
 -8 -5 6 60.33 1.84
 8 -5 -6 57.5 1.87
 8 -5 -6 59.3 2.08
 8 5 -6 58.55 1.96
 8 5 -6 64.05 2.38
 8 5 -6 61.56 1.87
 -7 -5 6 1.76 0.23
 7 -5 -6 2.11 0.47
 7 -5 -6 1.72 0.35
 7 -5 -6 2.18 0.3
 7 5 -6 1.43 0.24
 -7 5 6 2.34 0.31
 7 5 -6 2.14 0.5
 7 5 -6 2.79 0.34
 -6 -5 6 4.25 0.32
 6 -5 -6 5.46 0.67
 6 -5 -6 4.81 0.35
 -6 5 6 4.61 0.38
 6 5 -6 4.4 0.37
 6 5 -6 5.6 0.68
 6 5 -6 3.72 0.36
 5 -5 -6 2.99 0.49
 -5 -5 6 3.08 0.29
 5 -5 -6 2.8 0.29
 5 5 -6 3.21 0.32
 5 5 -6 3.31 0.32
 5 5 -6 3.25 0.42
 -5 5 6 2.74 0.29
 5 5 -6 3.5 0.56
 4 -5 -6 14.25 0.63
 4 -5 -6 16.23 0.91
 -4 -5 6 15.21 0.64
 4 5 -6 15.16 0.66
 4 5 -6 15.46 0.76
 -4 5 6 14.96 0.65
 -3 -5 6 0.11 0.13
 3 -5 -6 0.08 0.13
 -3 5 6 -0.09 0.13
 3 5 -6 0 0.15
 3 5 -6 0.17 0.18
 -2 -5 6 102.16 2.96
 2 -5 -6 103.57 2.97
 2 5 -6 97.16 2.97
 2 5 -6 101.79 3.02
 -2 5 6 102.25 2.98
 1 -5 -6 0.24 0.14
 -1 -5 6 0.57 0.18
 1 5 -6 0.41 0.19
 -1 5 6 0.36 0.17
 0 -5 6 227.4 6.43
 0 -5 -6 234.43 6.45
 0 5 6 231.09 6.46
 0 5 -6 232.44 6.45
 -1 -5 -6 16.94 0.76
 1 -5 6 16.84 0.75
 1 5 6 19.43 0.81
 2 -5 6 169.52 4.92
 -2 -5 -6 173.87 4.94
 -2 5 -6 175.53 4.94
 2 5 6 172.93 4.95
 -3 -5 -6 2.54 0.32
 3 -5 6 1.85 0.3
 -3 5 -6 2.67 0.35
 3 5 6 2.28 0.34
 -4 -5 -6 120.13 3.61
 4 -5 6 123.42 3.61
 -4 5 -6 122.7 3.61
 4 5 6 119.06 3.63
 -5 -5 -6 1 0.28
 5 -5 6 0.51 0.24
 5 5 6 0.48 0.28
 -5 5 -6 0.92 0.28
 6 -5 6 42.32 1.55
 -6 -5 -6 43.51 1.59
 -6 5 -6 42.72 1.56
 6 5 6 45.09 1.62
 -7 -5 -6 0.31 0.23
 7 -5 6 0.8 0.28
 7 5 6 0.42 0.29
 -7 5 -6 0.22 0.25
 8 -5 6 31.56 1.26
 -8 -5 -6 28.16 1.26
 8 5 6 31.1 1.33
 9 -5 6 0.16 0.26
 9 5 6 -0.02 0.3
 10 -5 6 0.74 0.33
 10 5 6 0.38 0.37
 11 -5 6 0.17 0.3
 11 -5 6 0.08 0.33
 11 5 6 -0.55 0.33
 12 -5 6 0.63 0.4
 12 -5 6 1.19 0.4
 12 5 6 1.35 0.49
 13 -5 6 3.34 0.54
 13 -5 6 3.14 0.62
 13 5 6 2.97 0.59
 18 -6 -6 26.23 1.61
 18 6 -6 28.99 1.72
 17 -6 -6 -0.05 0.46
 17 6 -6 -0.11 0.52
 16 -6 -6 8.71 0.94
 16 6 -6 10.84 1.1
 15 -6 -6 -0.12 0.38
 15 6 -6 -0.46 0.42
 14 -6 -6 -0.15 0.31
 14 6 -6 0.59 0.47
 14 6 -6 0.19 0.25
 13 -6 -6 0.58 0.55
 13 -6 -6 0.96 0.39
 13 6 -6 0.77 0.28
 13 6 -6 0.08 0.37
 12 -6 -6 13.37 1.34
 12 -6 -6 11.33 0.85
 -12 6 6 11.5 0.83
 12 6 -6 11.47 1.12
 12 6 -6 11.33 0.66
 12 6 -6 11.18 0.88
 11 -6 -6 4.11 0.54
 11 -6 -6 4.26 0.28
 11 -6 -6 5.12 0.89
 11 6 -6 4.22 0.44
 11 6 -6 4.84 0.59
 -11 6 6 4.41 0.56
 11 6 -6 4.1 0.74
 10 -6 -6 117.9 3.76
 10 -6 -6 121.5 4.17
 10 -6 -6 119.8 3.38
 10 6 -6 122 3.53
 10 6 -6 119.23 4
 10 6 -6 121.06 3.69
 -10 6 6 115.43 3.76
 9 -6 -6 0.28 0.19
 9 -6 -6 0.4 0.3
 9 -6 -6 0.29 0.43
 9 6 -6 0.6 0.25
 9 6 -6 -0.03 0.25
 9 6 -6 0.7 0.46
 -9 6 6 0.7 0.34
 8 -6 -6 170.12 5.3
 8 -6 -6 167.32 5.01
 8 -6 -6 165.91 4.8
 -8 -6 6 163.34 4.76
 8 6 -6 169.22 4.84
 8 6 -6 173.94 5.22
 8 6 -6 167.67 4.8
 7 -6 -6 2.05 0.46
 -7 -6 6 1.99 0.28
 7 -6 -6 1.9 0.33
 7 6 -6 2.29 0.5
 7 6 -6 1.58 0.3
 7 6 -6 2.33 0.33
 -7 6 6 2.25 0.36
 6 -6 -6 376.82 10.63
 -6 -6 6 362.02 10.22
 6 -6 -6 377.83 10.27
 6 6 -6 371.1 10.21
 6 6 -6 395.19 10.64
 6 6 -6 373.03 10.25
 -6 6 6 367.77 10.27
 5 -6 -6 0.41 0.18
 -5 -6 6 0.96 0.2
 5 -6 -6 0.12 0.27
 5 6 -6 0.4 0.21
 5 6 -6 1.11 0.34
 -5 6 6 0.81 0.23
 5 6 -6 0.68 0.38
 5 6 -6 0.4 0.18
 4 -6 -6 258.7 7.25
 -4 -6 6 248.87 6.92
 4 -6 -6 251.4 6.92
 -4 6 6 242.61 6.93
 4 6 -6 248.18 6.94
 4 6 -6 248.17 7.11
 3 -6 -6 10.55 0.56
 -3 -6 6 11.35 0.56
 3 6 -6 10.53 0.65
 -3 6 6 11.26 0.59
 3 6 -6 10.33 0.59
 2 -6 -6 157.32 4.47
 -2 -6 6 154.17 4.46
 -2 6 6 156.5 4.48
 2 6 -6 156.56 4.48
 2 6 -6 156.94 4.55
 -1 -6 6 10.49 0.57
 1 -6 -6 10.47 0.57
 1 6 -6 10.64 0.6
 1 6 -6 10.55 0.63
 -1 6 6 10.76 0.6
 0 -6 6 86.81 2.62
 0 -6 -6 86.33 2.63
 0 6 -6 84.72 2.64
 1 -6 6 3.59 0.37
 -1 -6 -6 4.02 0.39
 1 6 6 3.44 0.39
 -1 6 -6 2.75 0.34
 2 -6 6 5.86 0.45
 -2 -6 -6 6.36 0.53
 2 6 6 6.94 0.57
 -2 6 -6 6.58 0.49
 3 -6 6 1.01 0.26
 -3 -6 -6 0.39 0.22
 -3 6 -6 0.35 0.23
 3 6 6 0.63 0.27
 4 -6 6 14.26 0.74
 -4 -6 -6 13.27 0.75
 -4 6 -6 15.05 0.78
 4 6 6 15.63 0.83
 -5 -6 -6 2.75 0.38
 5 -6 6 2.34 0.35
 -5 6 -6 2.5 0.37
 5 6 6 2.12 0.38
 6 -6 6 21.81 0.99
 -6 -6 -6 22.61 1.04
 6 6 6 22.52 1.08
 -6 6 -6 22.26 1.01
 7 -6 6 0.31 0.25
 -7 -6 -6 -0.25 0.23
 7 6 6 0.25 0.31
 -7 6 -6 -0.2 0.24
 -8 -6 -6 55.45 2.03
 8 -6 6 58.26 2
 8 6 6 56.85 2.08
 9 -6 6 2.13 0.41
 9 -6 6 0.91 0.33
 9 6 6 1.23 0.43
 10 -6 6 60.86 2.16
 10 -6 6 60.53 2.18
 10 6 6 63.13 2.29
 11 -6 6 5.16 0.6
 11 -6 6 5.4 0.64
 11 6 6 5.1 0.68
 12 -6 6 46.44 1.93
 12 -6 6 48.31 1.87
 12 6 6 49.74 2.03
 17 -7 -6 0.68 0.55
 17 7 -6 1.22 0.63
 16 -7 -6 46.13 2.06
 16 7 -6 46.61 2.13
 15 -7 -6 4.18 0.68
 15 7 -6 3.9 0.7
 14 -7 -6 66.98 2.55
 14 7 -6 70.36 2.6
 14 7 -6 67.91 2.24
 13 -7 -6 5.37 0.66
 13 7 -6 5.62 0.56
 13 7 -6 6.98 0.77
 12 -7 -6 87.69 3.39
 12 -7 -6 85.68 2.58
 12 -7 -6 85.32 2.97
 12 7 -6 88.95 2.76
 12 7 -6 87.7 2.95
 -12 7 6 84.01 2.97
 12 7 -6 89.21 3.22
 11 -7 -6 4.05 0.77
 11 -7 -6 3.12 0.3
 11 -7 -6 3.36 0.55
 11 7 -6 4.16 0.54
 -11 7 6 3.44 0.56
 11 7 -6 2.89 0.43
 10 -7 -6 79.48 2.4
 10 -7 -6 81.81 3.05
 10 -7 -6 75.84 2.67
 10 7 -6 76.42 2.59
 10 7 -6 82.25 2.55
 -10 7 6 78.7 2.77
 10 7 -6 79.89 2.87
 9 -7 -6 1.74 0.51
 9 -7 -6 2.16 0.47
 9 -7 -6 2 0.33
 9 7 -6 2.15 0.37
 -9 7 6 2.15 0.47
 9 7 -6 2.43 0.54
 9 7 -6 2.26 0.38
 -8 -7 6 48.48 1.65
 8 -7 -6 48.21 2.03
 8 -7 -6 47.14 1.67
 8 7 -6 47.34 1.65
 8 7 -6 48.7 1.94
 8 7 -6 48.48 1.69
 -7 -7 6 3.5 0.4
 7 -7 -6 4.49 0.47
 7 -7 -6 4.65 0.65
 -7 7 6 4.49 0.49
 7 7 -6 3.99 0.4
 7 7 -6 3.83 0.44
 7 7 -6 4.85 0.62
 -6 -7 6 0.32 0.19
 6 -7 -6 0.59 0.32
 6 -7 -6 0.32 0.22
 6 7 -6 0.45 0.35
 -6 7 6 0.34 0.27
 6 7 -6 0.85 0.22
 6 7 -6 0.24 0.25
 5 -7 -6 4.99 0.58
 -5 -7 6 4.55 0.42
 5 -7 -6 4.75 0.45
 5 7 -6 4.53 0.36
 5 7 -6 4.46 0.46
 -5 7 6 5.45 0.5
 5 7 -6 4.97 0.61
 5 7 -6 7.06 0.69
 4 -7 -6 22.19 0.92
 4 -7 -6 23.6 1.1
 -4 -7 6 21.57 0.91
 -4 7 6 23.59 0.97
 4 7 -6 20.69 0.94
 4 7 -6 20.89 1.1
 -3 -7 6 2.86 0.34
 3 -7 -6 3.49 0.38
 3 7 -6 2.54 0.35
 -3 7 6 2.86 0.37
 3 7 -6 3.21 0.46
 -2 -7 6 54.39 1.84
 2 -7 -6 56.26 1.85
 2 7 -6 54.36 1.86
 2 7 -6 58.46 1.98
 -2 7 6 56.03 1.87
 1 -7 -6 6.22 0.47
 -1 -7 6 6.07 0.47
 1 7 -6 6.9 0.57
 -1 7 6 6.62 0.5
 1 7 -6 5.86 0.52
 0 -7 6 187.04 5.35
 0 -7 -6 191.68 5.38
 0 7 -6 191.07 5.48
 0 7 6 186.42 5.39
 0 7 -6 181 5.36
 -1 -7 -6 0.42 0.2
 1 -7 6 0.48 0.23
 1 -7 6 0.49 0.1
 -1 7 -6 0.2 0.25
 1 7 6 0.82 0.28
 2 -7 6 112.23 3.38
 -2 -7 -6 111.11 3.4
 -2 7 -6 111.92 3.4
 2 7 6 111.72 3.42
 -3 -7 -6 -0.13 0.2
 3 -7 6 0.34 0.24
 -3 7 -6 0.38 0.28
 3 7 6 0.66 0.29
 -4 -7 -6 158.1 4.6
 4 -7 6 157.23 4.57
 4 7 6 151.79 4.61
 -4 7 -6 153.2 4.57
 5 -7 6 2.36 0.35
 5 -7 6 2.39 0.3
 -5 -7 -6 2.49 0.41
 5 7 6 2.68 0.46
 -5 7 -6 1.94 0.37
 6 -7 6 40.21 1.4
 -6 -7 -6 41.18 1.57
 6 -7 6 39.26 1.52
 -6 7 -6 39.72 1.54
 6 7 6 40.47 1.6
 -7 -7 -6 -0.07 0.25
 7 -7 6 0.14 0.21
 7 -7 6 0.31 0.25
 7 7 6 0.49 0.33
 -7 7 -6 0.25 0.28
 -8 -7 -6 16.36 0.94
 8 -7 6 15.19 0.88
 8 -7 6 15.14 0.81
 8 7 6 16.1 0.99
 9 -7 6 0.12 0.25
 9 -7 6 -0.08 0.28
 9 7 6 -0.03 0.35
 10 -7 6 0.25 0.32
 10 7 6 1.76 0.51
 11 -7 6 -0.18 0.32
 11 7 6 -0.49 0.39
 12 -7 6 0.95 0.42
 12 7 6 1.04 0.55
 17 -8 -6 -0.32 0.47
 17 8 -6 -0.26 0.56
 16 -8 -6 5.74 0.83
 16 8 -6 4.59 0.82
 15 -8 -6 -0.36 0.39
 15 8 -6 -0.3 0.46
 15 8 -6 0.02 0.32
 14 -8 -6 0 0.4
 14 8 -6 0.4 0.35
 14 8 -6 0.04 0.41
 13 -8 -6 6.57 0.76
 13 8 -6 6.86 0.66
 13 8 -6 8.11 0.83
 12 -8 -6 15.7 1.31
 12 -8 -6 16.25 0.69
 12 -8 -6 15.79 1.04
 12 8 -6 16.68 0.95
 -12 8 6 17.15 1.12
 12 8 -6 16.49 1.02
 11 -8 -6 1.6 0.44
 11 -8 -6 1.41 0.58
 11 -8 -6 1.25 0.26
 11 8 -6 1.46 0.41
 -11 8 6 1.03 0.46
 11 8 -6 1.62 0.42
 11 8 -6 1.24 0.5
 10 -8 -6 55.34 1.87
 10 -8 -6 57.11 2.14
 10 -8 -6 57.92 2.39
 10 8 -6 56.68 2
 -10 8 6 57.31 2.22
 10 8 -6 56.08 2.19
 10 8 -6 53.68 1.99
 9 -8 -6 12.61 0.74
 9 -8 -6 13.3 1.04
 9 8 -6 12.25 0.8
 9 8 -6 12.15 0.91
 9 8 -6 13.04 0.78
 8 -8 -6 133.68 4.33
 -8 -8 6 131.26 3.99
 8 -8 -6 133.86 4.01
 8 8 -6 130.64 4.15
 8 8 -6 135.19 3.93
 8 8 -6 136.11 4.05
 7 -8 -6 1.11 0.31
 7 -8 -6 0.46 0.34
 -7 -8 6 0.74 0.27
 7 8 -6 0.27 0.31
 7 8 -6 0.38 0.22
 7 8 -6 0.64 0.36
 6 -8 -6 129.23 3.95
 -6 -8 6 122.83 3.71
 6 -8 -6 120.71 3.75
 6 8 -6 127 3.77
 -6 8 6 121.04 3.77
 6 8 -6 128.05 3.85
 6 8 -6 116.3 3.52
 5 -8 -6 1.16 0.29
 5 -8 -6 1.18 0.37
 -5 -8 6 1.07 0.27
 5 8 -6 0.86 0.3
 -5 8 6 0.88 0.32
 5 8 -6 1.24 0.4
 5 8 -6 0.93 0.2
 4 -8 -6 177.82 5.31
 4 -8 -6 176.24 5.2
 -4 -8 6 185.72 5.21
 4 8 -6 182.54 5.47
 4 8 -6 178.88 5.23
 -4 8 6 178.22 5.23
 3 -8 -6 4.15 0.51
 3 -8 -6 4.91 0.49
 -3 -8 6 4.19 0.47
 3 8 -6 5.11 0.55
 -3 8 6 3.92 0.47
 3 8 -6 3.8 0.55
 2 -8 -6 92.99 2.94
 -2 -8 6 94.98 2.94
 2 8 -6 96.91 2.99
 -2 8 6 95.47 2.97
 2 8 -6 94.67 3.1
 1 -8 -6 6.35 0.5
 -1 -8 6 7.39 0.53
 1 8 -6 6.78 0.64
 -1 8 6 7.6 0.58
 1 8 -6 5.74 0.54
 0 -8 6 26.99 1.12
 0 -8 -6 29.08 1.17
 0 8 6 26.92 1.18
 0 8 -6 26.89 1.17
 0 8 -6 27 1.24
 1 -8 6 8.2 0.59
 -1 -8 -6 8.79 0.62
 -1 8 -6 8.38 0.65
 -1 8 -6 6.95 0.67
 1 8 6 7.88 0.68
 -2 -8 -6 8.29 0.61
 2 -8 6 9.19 0.63
 -2 8 -6 9.39 0.75
 2 8 6 9.92 0.69
 -2 8 -6 8.73 0.71
 -3 -8 -6 -0.06 0.24
 3 -8 6 -0.08 0.22
 3 8 6 0.28 0.32
 -3 8 -6 0.07 0.27
 4 -8 6 6.14 0.59
 -4 -8 -6 6.06 0.61
 4 8 6 6.39 0.67
 -4 8 -6 5.45 0.57
 -5 -8 -6 1.78 0.36
 5 -8 6 1.99 0.36
 -5 8 -6 1.77 0.39
 5 8 6 2.1 0.43
 -6 -8 -6 21.83 1.06
 6 -8 6 19.51 1
 6 8 6 21.18 1.1
 -6 8 -6 19.79 1.02
 -7 -8 -6 0.32 0.32
 7 -8 6 0.57 0.3
 -7 8 -6 -0.21 0.28
 7 8 6 -0.18 0.34
 -8 -8 -6 42.28 1.72
 8 -8 6 40.52 1.64
 8 8 6 41.37 1.76
 9 -8 6 1.38 0.4
 9 8 6 1.99 0.54
 10 -8 6 37.93 1.58
 10 8 6 35.2 1.69
 11 -8 6 3.87 0.58
 11 8 6 5.52 0.79
 12 -8 6 28.4 1.42
 12 8 6 34.55 1.68
 16 -9 -6 32.45 1.67
 16 9 -6 26.22 1.61
 15 -9 -6 3.38 0.68
 15 9 -6 2.79 0.52
 15 9 -6 2.01 0.63
 14 -9 -6 50.5 2.09
 14 9 -6 47.95 2.07
 14 9 -6 46.93 1.85
 13 -9 -6 1.58 0.53
 13 9 -6 3.38 0.56
 13 9 -6 3.03 0.57
 12 -9 -6 73.13 2.61
 12 -9 -6 67.98 2.17
 12 9 -6 64.84 2.4
 12 9 -6 69.4 2.5
 -12 9 6 72.89 2.71
 11 -9 -6 -0.33 0.39
 11 -9 -6 -0.07 0.22
 11 -9 -6 -0.08 0.36
 -11 9 6 0.2 0.39
 11 9 -6 -0.08 0.32
 11 9 -6 0.3 0.38
 10 -9 -6 41.69 1.58
 10 -9 -6 47.27 2.02
 -10 9 6 44.59 1.94
 10 9 -6 43.44 1.92
 10 9 -6 41.47 1.65
 10 9 -6 41.35 1.71
 9 -9 -6 -0.12 0.26
 9 -9 -6 -0.26 0.34
 9 9 -6 0.75 0.32
 9 9 -6 0.35 0.35
 9 9 -6 0.37 0.37
 -8 -9 6 12.02 0.75
 8 -9 -6 10.26 0.73
 8 -9 -6 11.26 0.88
 8 9 -6 11.48 0.81
 8 9 -6 9.65 0.81
 8 9 -6 10.56 0.66
 7 -9 -6 -0.09 0.3
 -7 -9 6 -0.24 0.22
 7 -9 -6 0.13 0.25
 7 9 -6 0.16 0.34
 7 9 -6 -0.11 0.28
 7 9 -6 -0.05 0.24
 6 -9 -6 7.39 0.67
 6 -9 -6 6.17 0.67
 -6 -9 6 6.65 0.62
 6 9 -6 5.81 0.6
 6 9 -6 6.86 0.69
 -6 9 6 6.64 0.67
 5 -9 -6 6.87 0.66
 5 -9 -6 5.89 0.6
 -5 -9 6 5.6 0.56
 5 9 -6 5 0.58
 5 9 -6 6.77 0.63
 -5 9 6 4.83 0.57
 4 -9 -6 10.41 0.7
 4 -9 -6 10.28 0.69
 -4 -9 6 10.39 0.69
 4 9 -6 11.65 0.8
 -4 9 6 9.92 0.74
 4 9 -6 11.41 0.95
 3 -9 -6 0.15 0.24
 -3 -9 6 0.1 0.21
 3 -9 -6 0.36 0.26
 -3 9 6 -0.01 0.28
 3 9 -6 -0.11 0.26
 3 9 -6 0.04 0.37
 -2 -9 6 33.53 1.4
 2 -9 -6 35.3 1.42
 2 9 -6 39.67 1.51
 2 9 -6 37.18 1.63
 -2 9 6 39.37 1.52
 -1 -9 6 0.25 0.22
 1 -9 -6 0.05 0.23
 1 9 -6 0.09 0.27
 -1 9 6 0.53 0.34
 1 9 -6 -0.25 0.29
 0 -9 -6 62.69 2.16
 0 -9 6 64.53 2.15
 0 9 6 61.41 2.19
 0 9 -6 61.84 2.18
 0 9 -6 59.86 2.26
 -1 -9 -6 3.09 0.45
 1 -9 6 2.38 0.39
 1 9 6 1.62 0.43
 -1 9 -6 2 0.4
 -1 9 -6 2.82 0.5
 -2 -9 -6 68.58 2.34
 2 -9 6 66.71 2.31
 -2 9 -6 65.5 2.33
 -2 9 -6 70.94 2.48
 2 9 6 67.21 2.38
 -3 -9 -6 3.92 0.54
 3 -9 6 4.65 0.54
 -3 9 -6 4.49 0.55
 -3 9 -6 3.28 0.53
 3 9 6 3.85 0.56
 -4 -9 -6 64.44 2.23
 4 -9 6 60.66 2.16
 4 9 6 57.87 2.23
 -4 9 -6 62.09 2.19
 -4 9 -6 64.24 2.36
 -5 -9 -6 1.01 0.35
 5 -9 6 1.15 0.36
 -5 9 -6 0.81 0.35
 5 9 6 1.24 0.44
 -6 -9 -6 52.98 2
 6 -9 6 49.22 1.91
 6 9 6 53.38 2.05
 -6 9 -6 51.27 1.94
 7 -9 6 -0.21 0.28
 -7 -9 -6 -0.18 0.24
 7 9 6 0.32 0.37
 8 -9 6 10.27 0.8
 -8 -9 -6 12.25 0.91
 8 9 6 12.92 1.06
 9 -9 6 0.09 0.32
 9 9 6 0.33 0.47
 10 -9 6 -0.06 0.32
 10 9 6 0.01 0.46
 11 -9 6 1.52 0.47
 11 9 6 0.72 0.57
 16 -10 -6 1.43 0.63
 16 10 -6 1.08 0.67
 15 -10 -6 1.01 0.54
 15 10 -6 1.58 0.49
 15 10 -6 0.7 0.56
 14 -10 -6 1.47 0.55
 14 10 -6 0.62 0.45
 14 10 -6 1.07 0.54
 13 -10 -6 1.84 0.54
 13 10 -6 2.18 0.54
 13 10 -6 1.74 0.58
 12 -10 -6 14.68 1.06
 12 -10 -6 13.92 0.77
 -12 10 6 13.85 1.17
 12 10 -6 16.45 1.05
 11 -10 -6 1.73 0.37
 -11 10 6 1.2 0.51
 11 10 -6 0.68 0.45
 10 -10 -6 20.6 1.07
 10 -10 -6 22.31 1.35
 10 10 -6 22.54 1.24
 9 -10 -6 6.64 0.67
 9 -10 -6 6.21 0.76
 9 10 -6 5.62 0.71
 8 -10 -6 51.9 2.11
 8 -10 -6 59.73 2.03
 -8 -10 6 50.67 1.97
 8 10 -6 51.17 2.04
 7 -10 -6 0.37 0.3
 7 -10 -6 0.38 0.3
 -7 -10 6 -0.09 0.25
 7 10 -6 -0.16 0.38
 6 -10 -6 74.59 2.55
 6 -10 -6 73.31 2.51
 -6 -10 6 71.8 2.5
 6 10 -6 73.81 2.58
 -6 10 6 72.68 2.54
 -5 -10 6 0.53 0.3
 5 -10 -6 0.89 0.33
 5 -10 -6 0.79 0.33
 -5 10 6 0.12 0.37
 5 10 -6 0.46 0.36
 4 -10 -6 82.28 2.85
 4 -10 -6 89.92 2.81
 -4 -10 6 83.82 2.83
 4 10 -6 87.23 2.9
 -4 10 6 79.78 2.86
 4 10 -6 94.98 3.2
 3 -10 -6 3.44 0.49
 3 -10 -6 3.54 0.45
 -3 -10 6 4.93 0.55
 -3 10 6 4.64 0.59
 3 10 -6 3.71 0.56
 3 10 -6 4.07 0.69
 2 -10 -6 60.51 2.18
 2 -10 -6 62.4 2.09
 -2 -10 6 62.68 2.18
 2 10 -6 61.8 2.22
 2 10 -6 59.1 2.35
 -2 10 6 60.5 2.22
 1 -10 -6 3.06 0.46
 -1 -10 6 3.85 0.51
 1 10 -6 4.52 0.6
 -1 10 6 4.08 0.57
 1 10 -6 3.81 0.63
 0 -10 -6 29.43 1.31
 0 -10 6 28.57 1.28
 0 10 -6 29.18 1.45
 0 10 -6 30.24 1.35
 0 10 6 27.95 1.36
 -1 -10 -6 4.3 0.57
 1 -10 6 3.98 0.54
 -1 10 -6 3.47 0.54
 1 10 6 4.58 0.64
 -1 10 -6 2.77 0.52
 2 -10 6 0.62 0.31
 -2 -10 -6 0.68 0.31
 2 10 6 1.52 0.44
 -2 10 -6 0.88 0.39
 -2 10 -6 0.08 0.34
 -3 -10 -6 1.37 0.4
 3 -10 6 1.76 0.41
 -3 10 -6 1.35 0.43
 -3 10 -6 1.41 0.45
 3 10 6 1.04 0.45
 4 -10 6 0.03 0.31
 -4 -10 -6 0.52 0.31
 -4 10 -6 0.36 0.4
 -4 10 -6 0.44 0.37
 4 10 6 0.37 0.38
 -5 -10 -6 2.51 0.51
 5 -10 6 1.31 0.39
 -5 10 -6 2.38 0.51
 5 10 6 3.15 0.6
 -5 10 -6 2.66 0.57
 6 -10 6 27.21 1.32
 -6 -10 -6 27.53 1.35
 -6 10 -6 26.37 1.34
 6 10 6 30.22 1.45
 -6 10 -6 28.59 1.5
 -7 -10 -6 2.18 0.49
 7 -10 6 2.28 0.48
 -7 10 -6 1.19 0.55
 7 10 6 2.1 0.56
 -8 -10 -6 26.7 1.4
 8 -10 6 24.93 1.3
 -8 10 -6 28.51 1.59
 8 10 6 27.17 1.48
 9 -10 6 3.46 0.58
 9 10 6 3.86 0.77
 10 -10 6 30.08 1.44
 10 10 6 28.66 1.61
 11 -10 6 1.88 0.51
 15 -11 -6 0.52 0.52
 15 11 -6 1.65 0.56
 14 -11 -6 26.96 1.53
 14 11 -6 26.81 1.44
 13 11 -6 0.33 0.45
 12 -11 -6 23.02 1.11
 -12 11 6 26.61 1.56
 12 11 -6 25.33 1.38
 11 -11 -6 1.14 0.39
 11 11 -6 0.69 0.48
 10 -11 -6 19.19 1.06
 10 11 -6 17.89 1.16
 9 -11 -6 0.16 0.34
 9 -11 -6 0.09 0.32
 9 11 -6 -0.03 0.43
 -8 -11 6 4.34 0.59
 8 -11 -6 5.4 0.68
 8 -11 -6 8.35 0.77
 8 11 -6 3.83 0.66
 7 -11 -6 3.62 0.54
 7 -11 -6 3.18 0.51
 -7 -11 6 5.07 0.62
 7 11 -6 2.22 0.56
 6 -11 -6 0.65 0.29
 -6 -11 6 0.26 0.32
 6 -11 -6 0.15 0.29
 6 11 -6 -0.3 0.36
 -5 -11 6 2.08 0.47
 5 -11 -6 2.02 0.44
 5 -11 -6 1.73 0.52
 5 11 -6 2.49 0.57
 -5 11 6 2.61 0.52
 4 -11 -6 2.2 0.46
 -4 -11 6 2.31 0.46
 4 11 -6 1.75 0.51
 -4 11 6 2.6 0.55
 3 -11 -6 0.4 0.32
 -3 -11 6 0.74 0.35
 3 11 -6 -0.05 0.41
 3 11 -6 -0.03 0.4
 -3 11 6 0.02 0.37
 2 -11 -6 22.14 1.14
 -2 -11 6 22.15 1.15
 2 11 -6 21.16 1.22
 -2 11 6 19.49 1.18
 2 11 -6 20.68 1.32
 -1 -11 6 0.97 0.35
 1 -11 -6 0.45 0.34
 -1 11 6 0.33 0.42
 1 11 -6 0.2 0.36
 1 11 -6 0.56 0.44
 0 -11 -6 29.5 1.35
 0 -11 6 28.91 1.32
 0 11 6 26.48 1.39
 0 11 -6 28.02 1.5
 0 11 -6 26.4 1.34
 -1 -11 -6 0.59 0.35
 1 -11 6 0.2 0.28
 1 11 6 -0.37 0.34
 -1 11 -6 0.3 0.36
 -1 11 -6 0.64 0.44
 2 -11 6 39.46 1.7
 -2 -11 -6 40.55 1.72
 2 11 6 42.63 1.82
 -2 11 -6 39.7 1.75
 -2 11 -6 41.84 1.89
 -3 -11 -6 0.25 0.34
 3 -11 6 0.08 0.3
 -3 11 -6 0.27 0.43
 -3 11 -6 -0.29 0.3
 3 11 6 0.53 0.46
 4 -11 6 37.67 1.64
 -4 -11 -6 36.79 1.66
 -4 11 -6 38.2 1.69
 4 11 6 38.95 1.77
 -4 11 -6 38.12 1.83
 5 -11 6 1.63 0.47
 -5 -11 -6 3.12 0.57
 5 11 6 1.88 0.57
 -5 11 -6 2.66 0.56
 -5 11 -6 3.09 0.67
 6 -11 6 14.75 1
 -6 -11 -6 14.91 1.01
 -6 11 -6 16.64 1.23
 6 11 6 14.12 1.07
 -6 11 -6 14.26 1.03
 7 -11 6 -0.04 0.34
 -7 -11 -6 0.12 0.34
 7 11 6 0.09 0.43
 -7 11 -6 -0.27 0.47
 8 -11 6 7.89 0.84
 -8 -11 -6 9.8 0.97
 -8 11 -6 8.69 1.05
 8 11 6 7.36 0.94
 9 -11 6 0.22 0.38
 9 11 6 -0.53 0.51
 -9 11 -6 -0.07 0.52
 10 -11 6 0.47 0.44
 -10 11 -6 0.2 0.56
 10 11 6 -0.25 0.57
 14 12 -6 0.24 0.53
 13 -12 -6 0.87 0.45
 13 12 -6 0.66 0.54
 12 -12 -6 3.58 0.53
 12 12 -6 3.92 0.69
 11 -12 -6 2.88 0.49
 11 12 -6 2.6 0.64
 10 -12 -6 11.35 0.87
 10 12 -6 8.89 0.95
 9 -12 -6 2.25 0.5
 9 12 -6 0.87 0.51
 8 -12 -6 33.05 1.48
 -8 -12 6 29.44 1.97
 8 12 -6 29.23 1.55
 7 -12 -6 1.13 0.4
 -7 -12 6 0.55 0.36
 7 12 -6 0.92 0.51
 -6 -12 6 17.57 1.09
 6 -12 -6 19.18 1.09
 6 12 -6 16.44 1.17
 -5 -12 6 2.84 0.55
 5 -12 -6 1.13 0.4
 -5 12 6 1.76 0.5
 5 12 -6 3.3 0.67
 4 -12 -6 36.97 1.59
 -4 -12 6 32.43 1.53
 4 12 -6 38.1 1.71
 -4 12 6 34.43 1.63
 -3 -12 6 0.24 0.34
 3 -12 -6 0.33 0.33
 3 12 -6 0.09 0.44
 3 12 -6 0.12 0.46
 -3 12 6 0.49 0.45
 2 -12 -6 14.75 0.96
 -2 -12 6 14.69 0.98
 -2 12 6 14.15 1.02
 2 12 -6 13.49 1.17
 2 12 -6 15.84 1.12
 -1 -12 6 0.35 0.33
 1 -12 -6 0.48 0.33
 1 12 -6 0.15 0.4
 -1 12 6 0.05 0.37
 1 12 -6 0.23 0.47
 0 -12 -6 13.03 0.97
 0 -12 6 14 0.98
 0 12 -6 16.14 1.23
 0 12 6 14.86 1.12
 0 12 -6 16.84 1.15
 1 -12 6 1.58 0.47
 -1 -12 -6 3.15 0.58
 1 12 6 1.57 0.58
 -1 12 -6 0.92 0.48
 -1 12 -6 2.44 0.6
 -2 -12 -6 0.2 0.37
 2 -12 6 0.63 0.4
 -2 12 -6 0.25 0.52
 -2 12 -6 0.84 0.5
 2 12 6 0.03 0.5
 3 -12 6 1.27 0.42
 -3 -12 -6 1.95 0.51
 -3 12 -6 1.7 0.62
 -3 12 -6 1.36 0.47
 3 12 6 2.56 0.66
 4 -12 6 0.54 0.41
 -4 -12 -6 1.45 0.46
 -4 12 -6 0.98 0.51
 -4 12 -6 0.55 0.53
 4 12 6 1.33 0.55
 -5 -12 -6 0.52 0.43
 5 -12 6 0.5 0.37
 -5 12 -6 0.89 0.46
 -5 12 -6 0.32 0.52
 5 12 6 2.25 0.63
 -6 -12 -6 9.77 1
 6 -12 6 8.1 0.87
 6 12 6 10.13 1.1
 -6 12 -6 8.3 1.02
 7 -12 6 4.28 0.68
 -7 -12 -6 4.5 0.74
 7 12 6 4.52 0.84
 -7 12 -6 3.44 0.82
 -8 -12 -6 17.6 1.36
 8 -12 6 17.76 1.17
 8 12 6 14.24 1.3
 -8 12 -6 18.48 1.41
 9 -12 6 2.63 0.62
 -9 12 -6 3.58 0.84
 9 12 6 2.71 0.81
 14 13 -6 9.81 1.05
 13 -13 -6 -0.07 0.33
 13 13 -6 0.96 0.61
 12 -13 -6 9.41 0.84
 12 13 -6 10.13 1.06
 11 -13 -6 0.38 0.39
 11 13 -6 0.05 0.52
 10 -13 -6 6.07 0.72
 10 13 -6 5.98 0.88
 9 -13 -6 0.17 0.38
 9 13 -6 0.09 0.5
 8 -13 -6 4.18 0.65
 8 13 -6 4.16 0.73
 -7 -13 6 0.23 0.37
 7 -13 -6 0.12 0.34
 7 13 -6 0.15 0.49
 -6 -13 6 0.09 0.36
 6 -13 -6 0.94 0.39
 6 13 -6 0.66 0.5
 -5 -13 6 0.93 0.4
 5 -13 -6 1.36 0.43
 5 13 -6 0.44 0.52
 -5 13 6 1.89 0.58
 4 -13 -6 2.76 0.53
 -4 -13 6 2.47 0.52
 -4 13 6 3.08 0.63
 4 13 -6 1.84 0.56
 3 -13 -6 0.49 0.37
 -3 -13 6 0.33 0.4
 3 13 -6 0.73 0.56
 -3 13 6 0.36 0.48
 2 -13 -6 2.69 0.53
 -2 -13 6 2.6 0.56
 2 13 -6 2.94 0.67
 2 13 -6 3.09 0.75
 -2 13 6 3.25 0.68
 -1 -13 6 1.87 0.53
 1 -13 -6 0.75 0.42
 1 13 -6 0.45 0.53
 -1 13 6 1.51 0.59
 1 13 -6 0.75 0.59
 0 -13 6 18.68 1.14
 0 -13 -6 19.32 1.19
 0 13 6 17.57 1.22
 0 13 -6 15.86 1.17
 0 13 -6 18.17 1.4
 1 -13 6 0.55 0.42
 -1 -13 -6 0.55 0.36
 1 13 6 0.22 0.46
 -1 13 -6 0.22 0.53
 -1 13 -6 0.44 0.58
 2 -13 6 19.42 1.22
 -2 -13 -6 18.1 1.21
 2 13 6 19.76 1.35
 -2 13 -6 17.87 1.34
 -2 13 -6 19.48 1.32
 3 -13 6 0.22 0.42
 -3 -13 -6 0.82 0.44
 -3 13 -6 1.17 0.61
 3 13 6 0.39 0.51
 -3 13 -6 0.51 0.5
 -4 -13 -6 15.1 1.15
 4 -13 6 16.18 1.14
 4 13 6 16.66 1.31
 -4 13 -6 13.33 1.18
 5 -13 6 0.42 0.44
 -5 -13 -6 0.06 0.44
 5 13 6 0.2 0.61
 -5 13 -6 0.14 0.55
 -5 13 -6 -0.18 0.44
 6 -13 6 12.26 1.09
 -6 -13 -6 10.12 1.01
 -6 13 -6 9.78 1.12
 6 13 6 10.24 1.11
 7 -13 6 -0.14 0.45
 -7 -13 -6 0.94 0.52
 -7 13 -6 0.65 0.62
 7 13 6 -0.34 0.58
 8 -13 6 1.02 0.56
 -8 13 -6 2.11 0.77
 8 13 6 1.69 0.74
 13 -14 -6 1.19 0.46
 13 14 -6 1.65 0.68
 12 -14 -6 0.98 0.47
 12 14 -6 1.61 0.65
 11 -14 -6 0.99 0.46
 11 14 -6 1.08 0.62
 10 -14 -6 2.46 0.56
 10 14 -6 2.15 0.7
 9 -14 -6 1.23 0.47
 9 14 -6 -0.03 0.52
 8 -14 -6 8.23 0.85
 8 14 -6 8.44 0.99
 7 -14 -6 -0.43 0.34
 -7 -14 6 -0.17 0.36
 7 14 -6 0.21 0.56
 -6 -14 6 9.5 0.95
 6 -14 -6 12.71 0.95
 6 14 -6 10.75 1.11
 5 -14 -6 0.74 0.42
 -5 -14 6 0.22 0.42
 5 14 -6 -0.02 0.54
 4 -14 -6 5.29 0.69
 -4 -14 6 7.9 0.89
 -4 14 6 7.06 0.86
 4 14 -6 7.53 0.96
 -3 -14 6 0.13 0.38
 3 -14 -6 0.34 0.38
 3 14 -6 -0.44 0.5
 -3 14 6 -0.24 0.44
 2 -14 -6 6.2 0.78
 -2 -14 6 5.41 0.8
 2 14 -6 8.18 1.07
 2 14 -6 8.27 1
 -2 14 6 6.95 0.9
 1 -14 -6 0.96 0.47
 -1 -14 6 0.51 0.44
 1 14 -6 0.86 0.59
 -1 14 6 0.1 0.52
 1 14 -6 0.57 0.63
 0 -14 -6 1.57 0.5
 0 -14 6 1.83 0.56
 0 14 6 1.26 0.57
 0 14 -6 2.97 0.75
 0 14 -6 3.92 0.85
 -1 -14 -6 0.58 0.47
 1 -14 6 0.74 0.43
 -1 14 -6 0.1 0.48
 -1 14 -6 0.55 0.67
 1 14 6 1.01 0.61
 -2 -14 -6 0.47 0.43
 2 -14 6 1.31 0.56
 2 14 6 -0.12 0.48
 -2 14 -6 0.07 0.61
 -2 14 -6 0.18 0.58
 3 -14 6 1.3 0.56
 -3 -14 -6 1.05 0.53
 3 14 6 0.57 0.61
 -3 14 -6 0.8 0.68
 -3 14 -6 1.52 0.64
 -4 -14 -6 0.54 0.54
 4 -14 6 1.03 0.55
 -4 14 -6 -0.06 0.6
 -4 14 -6 0.26 0.58
 4 14 6 0.62 0.62
 5 -14 6 1.39 0.56
 -5 -14 -6 0.84 0.55
 -5 14 -6 1.34 0.7
 -5 14 -6 0.04 0.53
 5 14 6 1.61 0.73
 6 -14 6 3.86 0.73
 -6 -14 -6 3.57 0.75
 -6 14 -6 3.03 0.86
 6 14 6 4.03 0.9
 7 -14 6 1.25 0.56
 -7 -14 -6 1.92 0.65
 7 14 6 1.8 0.79
 -7 14 -6 2.94 0.89
 11 -15 -6 0.04 0.43
 11 15 -6 -0.23 0.58
 10 -15 -6 1.83 0.55
 10 15 -6 2.53 0.73
 9 -15 -6 0.45 0.44
 9 15 -6 -0.04 0.57
 8 -15 -6 0.14 0.41
 8 15 -6 -0.36 0.53
 7 -15 -6 0.56 0.42
 -7 -15 6 -0.22 0.37
 7 15 -6 -0.58 0.55
 6 -15 -6 0.07 0.37
 -6 -15 6 0.1 0.38
 6 15 -6 -1.01 0.5
 5 -15 -6 0.37 0.4
 -5 -15 6 -0.1 0.41
 5 15 -6 1.43 0.64
 4 -15 -6 0.24 0.39
 -4 -15 6 0.06 0.41
 4 15 -6 -0.25 0.56
 -4 15 6 0.57 0.54
 -3 -15 6 -0.68 0.34
 3 -15 -6 0.8 0.42
 -3 15 6 0.57 0.56
 3 15 -6 -0.26 0.55
 -2 -15 6 1.46 0.56
 2 -15 -6 1.36 0.51
 2 15 -6 0.88 0.65
 -2 15 6 1.5 0.65
 1 -15 -6 0.97 0.5
 -1 -15 6 0.42 0.47
 1 15 -6 1.39 0.65
 1 15 -6 0.29 0.59
 -1 15 6 0.09 0.54
 0 -15 -6 1.9 0.61
 0 -15 6 3.14 0.7
 0 15 6 1.38 0.66
 0 15 -6 2.58 0.76
 0 15 -6 2.81 0.76
 -1 -15 -6 -0.25 0.44
 1 -15 6 1.24 0.55
 -1 15 -6 0.95 0.69
 1 15 6 -0.76 0.57
 -1 15 -6 1.16 0.63
 2 -15 6 3.52 0.72
 -2 -15 -6 4.64 0.74
 2 15 6 4.45 0.84
 -2 15 -6 4.29 0.95
 -2 15 -6 4.02 0.83
 -3 -15 -6 1.25 0.56
 3 -15 6 1.1 0.57
 3 15 6 0.41 0.67
 -3 15 -6 1.19 0.64
 -3 15 -6 2.2 0.79
 4 -15 6 4.03 0.77
 -4 -15 -6 3.43 0.75
 -4 15 -6 3.63 0.84
 -4 15 -6 4.97 1.02
 4 15 6 3.31 0.86
 -5 -15 -6 0.25 0.53
 5 -15 6 -0.05 0.5
 -5 15 -6 0.33 0.61
 5 15 6 -0.23 0.64
 6 -15 6 1.13 0.59
 -6 -15 -6 1.19 0.63
 6 15 6 1.42 0.8
 -6 15 -6 0.49 0.74
 10 -16 -6 0.54 0.47
 10 16 -6 1.36 0.7
 9 -16 -6 0.57 0.49
 9 16 -6 -0.18 0.6
 8 -16 -6 1.08 0.51
 8 16 -6 1.29 0.71
 7 -16 -6 0.22 0.47
 -7 -16 6 0.44 0.45
 7 16 -6 0.47 0.62
 6 -16 -6 1.78 0.56
 -6 -16 6 1.64 0.54
 6 16 -6 0.76 0.59
 5 -16 -6 0.07 0.39
 -5 -16 6 0.24 0.46
 5 16 -6 -0.22 0.56
 4 -16 -6 0.95 0.47
 -4 -16 6 0.82 0.51
 4 16 -6 1.34 0.66
 -3 -16 6 0.51 0.45
 3 -16 -6 -0.52 0.39
 -3 16 6 -0.61 0.55
 3 16 -6 0.77 0.6
 -2 -16 6 0.81 0.53
 2 -16 -6 1.77 0.56
 -2 16 6 2.01 0.72
 2 16 -6 1.59 0.72
 -1 -16 6 0.74 0.46
 1 -16 -6 0.48 0.49
 1 16 -6 0.03 0.56
 -1 16 6 -0.12 0.58
 0 -16 6 0.8 0.55
 0 -16 -6 -0.07 0.47
 0 16 6 0.75 0.69
 0 16 -6 1.6 0.77
 0 16 -6 1.64 0.7
 1 -16 6 -0.69 0.42
 -1 -16 -6 0.58 0.51
 -1 16 -6 -0.73 0.56
 -1 16 -6 -0.01 0.68
 1 16 6 -0.63 0.55
 -2 -16 -6 -0.2 0.51
 2 -16 6 0.3 0.45
 -2 16 -6 -0.19 0.58
 -2 16 -6 0.82 0.74
 2 16 6 0.55 0.68
 -3 -16 -6 0.33 0.47
 3 -16 6 0.58 0.57
 -3 16 -6 -0.57 0.7
 -3 16 -6 1.03 0.73
 3 16 6 0.69 0.65
 4 -16 6 -0.36 0.51
 -4 -16 -6 0.35 0.59
 4 16 6 0.1 0.75
 -4 16 -6 0.31 0.76
 -4 16 -6 -0.19 0.62
 8 -17 -6 0.31 0.48
 8 17 -6 -0.14 0.64
 7 -17 -6 -0.25 0.44
 7 17 -6 0.85 0.7
 -6 -17 6 0.18 0.48
 6 -17 -6 0.15 0.47
 6 17 -6 0.3 0.68
 5 -17 -6 0.26 0.48
 -5 -17 6 0.17 0.47
 5 17 -6 0.52 0.69
 4 -17 -6 0.85 0.49
 -4 -17 6 -0.39 0.46
 4 17 -6 -0.34 0.64
 -3 -17 6 0.24 0.47
 3 -17 -6 -0.91 0.38
 -3 17 6 1.27 0.69
 3 17 -6 0.13 0.58
 -2 -17 6 0.59 0.53
 2 -17 -6 0.23 0.47
 2 17 -6 0.59 0.66
 -2 17 6 -0.2 0.54
 1 -17 -6 1.82 0.62
 -1 -17 6 0.51 0.55
 1 17 -6 2 0.77
 -1 17 6 0.22 0.63
 0 -17 -6 0.14 0.51
 0 -17 6 -0.08 0.51
 0 17 -6 0.76 0.74
 0 17 -6 0.82 0.72
 0 17 6 0.32 0.66
 1 -17 6 1.67 0.63
 -1 -17 -6 1.08 0.57
 1 17 6 1.72 0.77
 -1 17 -6 0.22 0.62
 -1 17 -6 1.12 0.84
 -2 -17 -6 0.42 0.58
 2 -17 6 0.76 0.59
 2 17 6 1.67 0.82
 -2 17 -6 1.46 0.75
 -2 17 -6 -0.3 0.74
 19 0 -7 0.16 0.54
 18 0 -7 0.62 0.56
 17 0 -7 1.08 0.55
 16 0 -7 0.02 0.43
 15 0 -7 -0.14 0.34
 15 0 -7 -0.36 0.63
 14 0 -7 0.25 0.36
 14 0 -7 0 0.6
 13 0 -7 0.46 0.67
 13 0 -7 0 0.28
 12 0 -7 -0.19 0.56
 12 0 -7 0.36 0.28
 11 0 -7 0.57 0.31
 11 0 -7 0.2 0.52
 10 0 -7 -0.37 0.44
 10 0 -7 0.06 0.27
 9 0 -7 0.57 0.46
 9 0 -7 0.2 0.22
 8 0 -7 0.14 0.36
 8 0 -7 0.09 0.24
 8 0 -7 0.03 0.06
 7 0 -7 0.99 0.42
 7 0 -7 1.14 0.13
 7 0 -7 1.42 0.33
 6 0 -7 0.72 0.38
 6 0 -7 0.22 0.09
 6 0 -7 0.22 0.23
 -5 0 7 2.21 0.19
 5 0 -7 1.86 0.18
 -4 0 7 0.18 0.1
 4 0 -7 0.3 0.11
 3 0 -7 14.4 0.56
 -3 0 7 14.25 0.56
 -2 0 7 0.07 0.1
 2 0 -7 0.2 0.12
 1 0 -7 3.86 0.28
 -1 0 7 2.68 0.26
 0 0 7 -0.15 0.1
 0 0 -7 0.07 0.12
 1 0 7 0.38 0.18
 -1 0 -7 0.7 0.19
 2 0 7 -0.1 0.14
 -2 0 -7 -0.06 0.15
 3 0 7 3.82 0.39
 -3 0 -7 3.31 0.37
 -4 0 -7 -0.02 0.17
 4 0 7 0.05 0.18
 -5 0 -7 0.27 0.21
 5 0 7 0.01 0.2
 -6 0 -7 -0.09 0.17
 6 0 7 0.05 0.19
 -7 0 -7 0.88 0.26
 7 0 7 0.44 0.25
 8 0 7 -0.16 0.22
 -8 0 -7 0.13 0.21
 9 0 7 1.43 0.35
 10 0 7 0.31 0.32
 11 0 7 3.81 0.55
 12 0 7 0.33 0.38
 13 0 7 2.09 0.52
 19 -1 -7 -0.28 0.54
 19 1 -7 0.03 0.56
 18 -1 -7 1.53 0.57
 18 1 -7 0.55 0.55
 17 -1 -7 0.45 0.51
 17 1 -7 0.17 0.5
 16 -1 -7 0.6 0.51
 16 1 -7 0.1 0.39
 15 -1 -7 0.24 0.37
 15 -1 -7 -0.5 0.63
 15 1 -7 0 0.33
 15 1 -7 -0.67 0.72
 14 -1 -7 0.82 0.7
 14 -1 -7 0.87 0.37
 14 1 -7 0.19 0.75
 14 1 -7 0.82 0.42
 13 -1 -7 0.06 0.32
 13 -1 -7 -0.11 0.56
 13 1 -7 0.3 0.35
 13 1 -7 0.78 0.66
 12 -1 -7 2.24 0.72
 12 -1 -7 1.29 0.39
 12 1 -7 0.25 0.34
 12 1 -7 -0.51 0.58
 11 -1 -7 0.11 0.55
 11 -1 -7 -0.18 0.27
 11 1 -7 0.05 0.49
 11 1 -7 0.26 0.27
 10 -1 -7 1.99 0.63
 10 -1 -7 1.45 0.37
 10 1 -7 0.64 0.55
 10 1 -7 1.65 0.36
 9 -1 -7 0.06 0.39
 9 -1 -7 -0.04 0.2
 9 1 -7 -0.04 0.06
 9 1 -7 -0.09 0.21
 9 1 -7 -0.14 0.44
 8 -1 -7 1.37 0.31
 8 -1 -7 0.93 0.45
 8 -1 -7 1.06 0.11
 8 1 -7 0.89 0.11
 8 1 -7 1.22 0.5
 8 1 -7 0.93 0.28
 7 -1 -7 0.76 0.28
 7 -1 -7 1.12 0.13
 7 -1 -7 0.69 0.42
 7 1 -7 1.15 0.45
 7 1 -7 0.93 0.12
 7 1 -7 0.98 0.29
 6 -1 -7 2.56 0.19
 6 -1 -7 2.32 0.54
 -6 -1 7 2.21 0.18
 6 1 -7 2.22 0.19
 6 1 -7 1.91 0.49
 6 1 -7 2.86 0.42
 -5 -1 7 0.47 0.11
 5 -1 -7 0.34 0.11
 5 1 -7 0.37 0.12
 -5 1 7 0.43 0.11
 4 -1 -7 0.61 0.14
 -4 -1 7 0.84 0.14
 -4 1 7 0.81 0.14
 4 1 -7 0.81 0.14
 -3 -1 7 0.11 0.1
 3 -1 -7 0.34 0.13
 -3 1 7 0.44 0.12
 3 1 -7 0.07 0.11
 2 -1 -7 0.67 0.16
 -2 -1 7 1.58 0.21
 -2 1 7 0.97 0.16
 2 1 -7 0.95 0.18
 1 -1 -7 1.31 0.19
 -1 -1 7 1.57 0.22
 1 1 -7 1.12 0.2
 -1 1 7 0.99 0.17
 0 -1 -7 0.86 0.18
 0 -1 7 0.92 0.19
 0 1 -7 1.16 0.23
 0 1 7 0.92 0.18
 -1 -1 -7 3.7 0.36
 1 -1 7 2.84 0.3
 -1 1 -7 3.16 0.31
 1 1 7 4.31 0.38
 2 -1 7 4.33 0.39
 -2 -1 -7 3.36 0.35
 2 1 7 3.17 0.35
 -2 1 -7 3.82 0.37
 3 -1 7 5.73 0.44
 -3 -1 -7 6.08 0.43
 3 1 7 5.65 0.46
 -3 1 -7 5.72 0.47
 4 -1 7 2.66 0.34
 -4 -1 -7 2.19 0.33
 4 1 7 2.42 0.34
 -4 1 -7 2.95 0.36
 5 -1 7 8.67 0.55
 -5 -1 -7 7.12 0.52
 -5 1 -7 7.66 0.54
 5 1 7 8.5 0.56
 -6 -1 -7 1.52 0.31
 6 -1 7 1.64 0.33
 6 1 7 1.73 0.34
 -6 1 -7 2 0.34
 7 -1 7 7.26 0.56
 -7 -1 -7 6.23 0.56
 -7 1 -7 5.74 0.53
 7 1 7 6.76 0.58
 8 -1 7 2.48 0.4
 -8 -1 -7 2.89 0.43
 -8 1 -7 3.1 0.42
 8 1 7 2.67 0.43
 9 -1 7 2.96 0.45
 9 1 7 2.08 0.41
 10 -1 7 -0.17 0.27
 10 1 7 0.17 0.31
 11 -1 7 0.6 0.37
 11 1 7 0.22 0.36
 12 -1 7 -0.25 0.32
 12 1 7 0.7 0.4
 13 -1 7 -0.5 0.35
 13 1 7 0.02 0.38
 19 -2 -7 0.06 0.58
 19 2 -7 1.01 0.66
 18 -2 -7 0.82 0.59
 18 2 -7 0.73 0.6
 17 -2 -7 0.13 0.48
 17 2 -7 -0.36 0.41
 16 -2 -7 -0.28 0.41
 16 2 -7 -0.21 0.43
 15 -2 -7 -0.05 0.4
 15 -2 -7 0.22 0.78
 15 2 -7 -0.01 0.65
 15 2 -7 0.47 0.44
 14 -2 -7 0.55 0.4
 14 -2 -7 -0.25 0.65
 14 2 -7 -0.03 0.62
 14 2 -7 0.79 0.42
 13 -2 -7 -0.45 0.55
 13 -2 -7 0.02 0.28
 13 2 -7 -0.26 0.31
 13 2 -7 -0.49 0.6
 12 -2 -7 0.39 0.32
 12 -2 -7 -0.77 0.55
 12 2 -7 0.17 0.31
 12 2 -7 -0.62 0.55
 11 -2 -7 -0.18 0.52
 11 -2 -7 -0.32 0.24
 11 2 -7 -0.04 0.27
 11 2 -7 -0.34 0.53
 10 -2 -7 0.88 0.31
 10 -2 -7 0.82 0.51
 10 2 -7 1.48 0.13
 10 2 -7 0.97 0.59
 10 2 -7 1.05 0.33
 9 -2 -7 -0.42 0.33
 9 -2 -7 -0.15 0.24
 9 2 -7 0.13 0.09
 9 2 -7 0.73 0.47
 9 2 -7 0.18 0.23
 8 -2 -7 5.31 0.74
 8 -2 -7 5.49 0.25
 8 -2 -7 6.78 0.62
 8 2 -7 3.89 0.69
 8 2 -7 5.73 0.28
 8 2 -7 4.62 0.47
 7 -2 -7 0.58 0.39
 7 -2 -7 -0.02 0.21
 7 -2 -7 0.06 0.08
 7 2 -7 0.03 0.09
 7 2 -7 0.1 0.36
 7 2 -7 -0.27 0.18
 -6 -2 7 16.36 0.58
 6 -2 -7 15.99 1.05
 -6 2 7 15.92 0.62
 6 2 -7 14.26 0.57
 6 2 -7 17.28 0.8
 6 2 -7 17.01 0.59
 6 2 -7 16.5 1.12
 -5 -2 7 4.17 0.26
 5 -2 -7 3.93 0.26
 5 2 -7 4.33 0.27
 -5 2 7 4.17 0.27
 4 -2 -7 14.78 0.57
 -4 -2 7 15.17 0.58
 4 2 -7 14.03 0.58
 -4 2 7 15.44 0.58
 -3 -2 7 1.56 0.2
 3 -2 -7 2 0.23
 -3 2 7 1.54 0.2
 3 2 -7 1.53 0.19
 2 -2 -7 21.09 0.79
 -2 -2 7 22.24 0.8
 -2 2 7 20.7 0.79
 2 2 -7 22.14 0.81
 1 -2 -7 6.09 0.37
 -1 -2 7 6.2 0.38
 1 2 -7 6.49 0.4
 -1 2 7 6.68 0.38
 0 -2 7 7.85 0.45
 0 2 7 8.42 0.45
 -1 -2 -7 8.25 0.49
 1 -2 7 9.52 0.49
 -1 2 -7 7.85 0.47
 1 2 7 9.02 0.5
 2 -2 7 2.81 0.32
 -2 -2 -7 2.78 0.34
 2 2 7 3.47 0.37
 -2 2 -7 2.21 0.31
 3 -2 7 0.8 0.23
 -3 -2 -7 0.74 0.21
 -3 2 -7 0.86 0.25
 3 2 7 1.02 0.23
 4 -2 7 1.02 0.25
 -4 -2 -7 0.94 0.23
 -4 2 -7 1.3 0.28
 4 2 7 1.21 0.25
 -5 -2 -7 0.76 0.26
 5 -2 7 0.48 0.23
 5 2 7 0.19 0.22
 -5 2 -7 0.62 0.24
 6 -2 7 1.02 0.28
 -6 -2 -7 0.66 0.24
 -6 2 -7 0.5 0.26
 6 2 7 0.65 0.27
 -7 -2 -7 0.26 0.23
 7 -2 7 0.32 0.24
 -7 2 -7 0.29 0.24
 7 2 7 0.21 0.26
 -8 -2 -7 0.14 0.23
 8 -2 7 0.09 0.23
 -8 2 -7 0.15 0.22
 8 2 7 -0.02 0.25
 9 -2 7 1.41 0.36
 9 2 7 1.54 0.39
 10 -2 7 2.27 0.43
 10 2 7 1.3 0.41
 11 -2 7 2.4 0.47
 11 2 7 2.95 0.53
 12 -2 7 1.63 0.43
 12 2 7 1.91 0.5
 19 -3 -7 -0.55 0.54
 19 3 -7 -0.5 0.52
 18 -3 -7 0.62 0.52
 18 3 -7 1.07 0.63
 17 -3 -7 0.46 0.45
 17 3 -7 -0.11 0.49
 16 -3 -7 4.6 0.72
 16 3 -7 4.99 0.78
 15 -3 -7 -0.39 0.75
 15 -3 -7 0.13 0.34
 15 3 -7 -0.04 0.41
 15 3 -7 1.78 0.87
 14 -3 -7 3.85 0.6
 14 -3 -7 3.28 0.98
 14 3 -7 2.85 0.82
 14 3 -7 3.86 0.63
 13 -3 -7 0.27 0.29
 13 -3 -7 0.67 0.7
 13 3 -7 0.94 0.69
 13 3 -7 0.39 0.35
 12 -3 -7 10.25 0.79
 12 -3 -7 8.91 1.13
 12 3 -7 10.06 0.79
 12 3 -7 10.37 0.38
 12 3 -7 11.6 1.29
 11 -3 -7 0.18 0.57
 11 -3 -7 0.32 0.29
 11 3 -7 0.58 0.13
 11 3 -7 0.74 0.6
 11 3 -7 0.48 0.31
 10 -3 -7 15.82 0.92
 10 -3 -7 15.38 1.3
 10 3 -7 16.97 0.58
 10 3 -7 16.24 0.88
 10 3 -7 15.3 1.3
 9 -3 -7 0.82 0.44
 9 -3 -7 0.23 0.25
 9 -3 -7 -0.01 0.11
 9 -3 -7 0.08 0.07
 9 3 -7 -0.12 0.22
 9 3 -7 0.44 0.48
 9 3 -7 0.13 0.11
 8 -3 -7 13.03 0.77
 -8 -3 7 12.01 0.55
 8 -3 -7 12.27 0.49
 8 -3 -7 11.28 0.96
 8 3 -7 11.92 1.04
 8 3 -7 11.57 0.69
 8 3 -7 12.94 0.5
 7 -3 -7 0.36 0.32
 7 -3 -7 -0.85 0.19
 -7 -3 7 0.08 0.09
 7 -3 -7 0.14 0.1
 7 3 -7 0.08 0.12
 7 3 -7 0.04 0.34
 7 3 -7 0.31 0.23
 6 -3 -7 6.02 0.73
 -6 -3 7 4.69 0.28
 6 -3 -7 4.49 0.27
 -6 3 7 4.47 0.28
 6 3 -7 4.1 0.35
 6 3 -7 4.62 0.46
 6 3 -7 4.7 0.3
 6 3 -7 3.53 0.59
 -5 -3 7 0.25 0.11
 5 -3 -7 0.25 0.11
 5 3 -7 0.18 0.13
 5 3 -7 0.11 0.13
 -5 3 7 0.18 0.12
 -4 -3 7 0.4 0.13
 4 3 -7 0.24 0.14
 -4 3 7 0.02 0.12
 -3 -3 7 0.21 0.13
 -3 3 7 0.3 0.14
 3 3 -7 0.2 0.14
 2 -3 -7 4.63 0.36
 -2 -3 7 4.03 0.31
 -2 3 7 4.24 0.33
 2 3 -7 4.28 0.35
 -1 -3 7 1.98 0.26
 1 -3 -7 1.35 0.23
 1 3 -7 1.92 0.26
 -1 3 7 1.56 0.24
 0 -3 7 15.13 0.66
 0 -3 -7 14.27 0.66
 0 3 7 15.5 0.69
 0 3 -7 16.15 0.68
 -1 -3 -7 6.09 0.41
 1 -3 7 5.64 0.4
 1 3 7 5.53 0.41
 2 -3 7 29.44 1.1
 -2 -3 -7 29.24 1.1
 2 3 7 30.31 1.13
 -3 -3 -7 11.86 0.63
 3 -3 7 12.24 0.64
 3 3 7 11.5 0.63
 -3 3 -7 11.92 0.64
 4 -3 7 20.49 0.92
 -4 -3 -7 22.95 0.96
 -4 3 -7 21.73 0.94
 4 3 7 22.39 0.96
 -5 -3 -7 12.77 0.72
 5 -3 7 14.49 0.73
 -5 3 -7 12.7 0.72
 5 3 7 13.41 0.74
 -6 -3 -7 14.05 0.74
 6 -3 7 12.07 0.69
 -6 3 -7 11.46 0.69
 6 3 7 10.8 0.7
 7 -3 7 2.63 0.4
 7 3 7 3.11 0.46
 -7 3 -7 2.78 0.4
 8 -3 7 2.25 0.39
 8 3 7 2.29 0.43
 9 -3 7 2.29 0.42
 9 3 7 3.09 0.49
 10 -3 7 2.72 0.46
 10 3 7 2.8 0.52
 11 -3 7 0.81 0.36
 11 3 7 0.68 0.4
 12 -3 7 0.68 0.38
 12 3 7 0.68 0.44
 18 -4 -7 6.46 0.95
 18 4 -7 5.11 0.88
 17 -4 -7 0.24 0.51
 17 4 -7 -0.12 0.49
 16 -4 -7 3.93 0.67
 16 4 -7 4.05 0.75
 15 -4 -7 -0.03 0.38
 15 -4 -7 -0.09 0.71
 15 4 -7 0.14 0.41
 15 4 -7 0.26 0.75
 14 -4 -7 1.35 0.74
 14 -4 -7 0.79 0.42
 14 4 -7 1.34 0.5
 14 4 -7 1.36 0.76
 13 -4 -7 0.45 0.59
 13 -4 -7 0.17 0.31
 13 4 -7 0.26 0.55
 13 4 -7 0.05 0.36
 12 -4 -7 0.54 0.63
 12 -4 -7 -0.13 0.27
 12 4 -7 0.29 0.59
 12 4 -7 0.77 0.35
 12 4 -7 0.02 0.13
 11 -4 -7 0.62 0.34
 11 -4 -7 0.03 0.5
 11 4 -7 0.6 0.16
 -11 4 7 0.68 0.37
 11 4 -7 0.22 0.53
 11 4 -7 0.27 0.3
 10 -4 -7 1.98 0.15
 10 -4 -7 2.82 0.71
 10 -4 -7 2.24 0.41
 10 4 -7 1.87 0.6
 10 4 -7 1.75 0.39
 10 4 -7 1.57 0.21
 9 -4 -7 0.95 0.32
 9 -4 -7 1.12 0.2
 9 -4 -7 0.9 0.45
 9 4 -7 0.52 0.49
 9 4 -7 1.39 0.2
 9 4 -7 1.66 0.35
 8 -4 -7 24.7 1.41
 8 -4 -7 23.9 0.86
 8 -4 -7 22.24 1.1
 -8 -4 7 23.98 0.82
 8 4 -7 24.95 1.43
 8 4 -7 23.91 0.84
 8 4 -7 23.16 1.01
 7 -4 -7 0.34 0.33
 -7 -4 7 0.38 0.13
 7 -4 -7 0.23 0.13
 7 4 -7 0.29 0.38
 7 4 -7 0.15 0.15
 7 4 -7 0.18 0.21
 -6 -4 7 36.5 1.15
 6 -4 -7 34.96 1.14
 6 -4 -7 36.4 1.63
 6 4 -7 37.84 1.18
 6 4 -7 33.1 1.25
 6 4 -7 34.46 1.67
 -6 4 7 35.15 1.15
 6 4 -7 33.96 1.28
 5 -4 -7 0.63 0.15
 5 -4 -7 0.58 0.32
 -5 -4 7 0.78 0.16
 -5 4 7 0.61 0.16
 5 4 -7 0.85 0.22
 5 4 -7 0.34 0.16
 4 -4 -7 64.98 1.98
 -4 -4 7 66.01 1.99
 -4 4 7 65.4 2
 4 4 -7 67.1 2.03
 4 4 -7 67.26 2.01
 3 -4 -7 2.58 0.27
 -3 -4 7 3.41 0.32
 3 4 -7 3.31 0.33
 -3 4 7 2.91 0.29
 -2 -4 7 49.54 1.58
 2 -4 -7 50.19 1.59
 2 4 -7 49.39 1.6
 -1 -4 7 5.29 0.39
 1 -4 -7 4.66 0.37
 -1 4 7 5.21 0.38
 1 4 -7 5.38 0.41
 0 -4 7 38.59 1.33
 0 4 -7 38.92 1.35
 1 -4 7 6.3 0.43
 1 4 7 5.26 0.42
 -1 4 -7 6.65 0.45
 2 -4 7 16.65 0.76
 2 4 7 16.36 0.79
 -2 4 -7 16.97 0.77
 3 -4 7 5.5 0.5
 -3 4 -7 5.77 0.51
 3 4 7 5.63 0.5
 4 -4 7 0.11 0.2
 4 4 7 0.14 0.24
 -4 4 -7 0.19 0.22
 5 -4 7 0.38 0.21
 -5 -4 -7 0.19 0.21
 5 4 7 0.32 0.24
 -5 4 -7 0.06 0.22
 -6 -4 -7 0.15 0.23
 6 -4 7 0.09 0.23
 6 4 7 0.33 0.28
 -6 4 -7 0.39 0.27
 7 -4 7 0.52 0.26
 -7 -4 -7 0.26 0.26
 -7 4 -7 0.12 0.23
 7 4 7 0.01 0.27
 8 -4 7 5.04 0.54
 -8 -4 -7 6.97 0.63
 8 4 7 7.3 0.68
 9 -4 7 4.54 0.54
 9 4 7 4.06 0.56
 10 -4 7 5.62 0.61
 10 4 7 6.63 0.7
 11 -4 7 4.28 0.57
 11 4 7 5.69 0.7
 12 -4 7 7.79 0.77
 12 4 7 7.53 0.81
 18 -5 -7 1.6 0.65
 18 5 -7 2.24 0.78
 17 -5 -7 0.61 0.51
 17 5 -7 -0.23 0.51
 16 -5 -7 6.59 0.83
 16 5 -7 5.74 0.82
 15 -5 -7 1.13 0.47
 15 -5 -7 1.86 0.85
 15 5 -7 2.91 0.64
 14 -5 -7 18.21 1.15
 14 -5 -7 16.94 1.68
 14 5 -7 17.3 1.16
 14 5 -7 19.28 1.56
 13 -5 -7 1.74 0.76
 13 -5 -7 0.15 0.36
 13 5 -7 0.51 0.19
 13 5 -7 0.31 0.39
 13 5 -7 0.19 0.6
 12 -5 -7 23.43 1.21
 12 -5 -7 24.1 1.68
 12 5 -7 23.66 0.86
 12 5 -7 24.04 1.58
 12 5 -7 21.33 1.18
 11 -5 -7 1.2 0.13
 11 -5 -7 1.29 0.42
 11 -5 -7 1.66 0.67
 11 5 -7 1.34 0.38
 11 5 -7 1.15 0.6
 -11 5 7 0.96 0.35
 11 5 -7 1.1 0.24
 10 -5 -7 24.32 1.21
 10 -5 -7 26.12 1.56
 10 -5 -7 26.9 0.89
 10 5 -7 25.62 1.17
 10 5 -7 26.56 0.95
 10 5 -7 28.35 1.59
 9 -5 -7 0.09 0.18
 9 -5 -7 -0.05 0.3
 9 -5 -7 0.11 0.39
 9 5 -7 0.13 0.43
 9 5 -7 0.18 0.18
 9 5 -7 0.27 0.25
 8 -5 -7 32.46 1.14
 8 -5 -7 31.77 1.62
 8 -5 -7 30.5 1.35
 -8 -5 7 30.61 1.06
 8 5 -7 32.64 1.62
 8 5 -7 30.53 1.08
 8 5 -7 30.89 1.22
 -7 -5 7 0.11 0.13
 7 -5 -7 0.11 0.15
 7 -5 -7 -0.04 0.33
 7 5 -7 0.09 0.4
 7 5 -7 0.09 0.17
 7 5 -7 0.28 0.22
 -7 5 7 0.02 0.17
 6 -5 -7 13.08 0.57
 6 -5 -7 12.84 0.88
 -6 -5 7 12.72 0.56
 6 5 -7 11.09 0.95
 6 5 -7 12.26 0.59
 -6 5 7 11.46 0.56
 6 5 -7 12.53 0.72
 6 5 -7 11.26 0.64
 5 -5 -7 2.12 0.46
 -5 -5 7 3.48 0.32
 5 -5 -7 2.59 0.28
 -5 5 7 2.95 0.31
 5 5 -7 2.68 0.38
 5 5 -7 2.84 0.3
 -4 -5 7 2.05 0.25
 4 -5 -7 1.99 0.26
 4 5 -7 2 0.28
 -4 5 7 1.95 0.27
 4 5 -7 2.27 0.31
 3 -5 -7 0.43 0.18
 -3 -5 7 0.38 0.15
 3 5 -7 0.35 0.19
 3 5 -7 0.2 0.18
 -3 5 7 0.7 0.2
 2 -5 -7 4.94 0.39
 -2 -5 7 4.43 0.35
 -2 5 7 5.46 0.42
 2 5 -7 5.31 0.4
 1 -5 -7 -0.02 0.13
 -1 -5 7 0.2 0.17
 -1 5 7 -0.06 0.15
 1 5 -7 -0.13 0.18
 0 -5 7 42.37 1.45
 0 -5 -7 43.04 1.46
 0 5 -7 41.21 1.46
 0 5 7 42.16 1.47
 -1 -5 -7 5.58 0.43
 1 -5 7 4.66 0.43
 1 5 7 5.74 0.45
 -1 5 -7 4.17 0.42
 2 -5 7 33.34 1.27
 -2 -5 -7 34 1.27
 2 5 7 34.99 1.3
 -2 5 -7 35.19 1.29
 -3 -5 -7 5.97 0.47
 3 -5 7 3.91 0.41
 3 5 7 5.5 0.5
 -3 5 -7 5.16 0.47
 4 -5 7 47.59 1.63
 -4 -5 -7 45.42 1.63
 4 5 7 45.23 1.66
 -4 5 -7 43.7 1.62
 -5 -5 -7 6.15 0.55
 5 -5 7 5.24 0.49
 -5 5 -7 5.66 0.54
 5 5 7 5.51 0.54
 6 -5 7 19.76 0.95
 -6 -5 -7 19.97 0.98
 6 5 7 19.82 1
 -6 5 -7 20.56 0.97
 -7 -5 -7 11.85 0.75
 7 -5 7 12.15 0.74
 7 5 7 11.1 0.78
 -7 5 -7 12.67 0.76
 8 -5 7 20.14 1
 -8 -5 -7 20.03 1.02
 8 5 7 20.47 1.07
 9 -5 7 4.15 0.55
 9 5 7 2.98 0.51
 10 -5 7 5.1 0.6
 10 5 7 5.86 0.69
 11 -5 7 0.99 0.4
 11 5 7 1.15 0.48
 12 -5 7 -0.22 0.35
 12 -5 7 -0.03 0.38
 12 5 7 -0.62 0.37
 18 -6 -7 10.66 1.14
 18 6 -7 11.42 1.23
 17 -6 -7 -0.05 0.43
 17 6 -7 0.23 0.6
 16 -6 -7 6.57 0.86
 16 6 -7 6.93 0.92
 15 -6 -7 -0.45 0.34
 15 6 -7 -0.71 0.42
 14 -6 -7 3.04 0.84
 14 -6 -7 3.21 0.59
 14 6 -7 3.57 0.4
 14 6 -7 2.12 0.59
 14 6 -7 3.41 0.87
 13 -6 -7 -0.05 0.56
 13 -6 -7 0.09 0.34
 13 6 -7 0.54 0.6
 13 6 -7 -0.03 0.22
 13 6 -7 -0.05 0.37
 12 -6 -7 1.04 0.59
 12 -6 -7 0.28 0.35
 12 6 -7 -0.25 0.31
 12 6 -7 0.17 0.22
 12 6 -7 -0.86 0.47
 11 -6 -7 1.33 0.54
 11 -6 -7 1.08 0.41
 11 -6 -7 1.55 0.19
 11 6 -7 1.33 0.29
 11 6 -7 1.23 0.39
 11 6 -7 1.64 0.62
 -11 6 7 1.03 0.38
 10 -6 -7 16.31 1.26
 10 -6 -7 14.68 0.92
 10 -6 -7 14.38 0.66
 10 6 -7 13.73 0.85
 10 6 -7 15.36 0.71
 10 6 -7 15.68 1.19
 9 -6 -7 0.66 0.37
 9 -6 -7 0.84 0.43
 9 -6 -7 0.65 0.24
 9 6 -7 0.75 0.23
 9 6 -7 0.52 0.49
 9 6 -7 1.01 0.29
 8 -6 -7 30.15 1.14
 -8 -6 7 29.72 1.07
 8 -6 -7 28.45 1.52
 8 6 -7 26.77 1.47
 8 6 -7 30.9 1.18
 8 6 -7 28.99 1.1
 7 -6 -7 2.08 0.51
 7 -6 -7 1.52 0.27
 -7 -6 7 1.86 0.27
 7 6 -7 1.81 0.5
 7 6 -7 1.64 0.29
 -7 6 7 1.78 0.31
 7 6 -7 1.48 0.29
 -6 -6 7 91.7 2.7
 6 -6 -7 90.59 2.71
 6 -6 -7 93.75 3.12
 6 6 -7 97.69 3.21
 -6 6 7 87.4 2.71
 6 6 -7 83.29 2.7
 6 6 -7 89.64 2.72
 5 -6 -7 0.51 0.31
 -5 -6 7 0.97 0.22
 5 -6 -7 1.1 0.22
 5 6 -7 0.62 0.31
 -5 6 7 0.63 0.22
 5 6 -7 0.67 0.24
 -4 -6 7 81.29 2.45
 4 -6 -7 80.95 2.45
 4 6 -7 80.46 2.58
 4 6 -7 78.53 2.46
 -4 6 7 80.09 2.46
 3 -6 -7 5.49 0.41
 -3 -6 7 5.83 0.41
 3 6 -7 5.11 0.5
 3 6 -7 4.26 0.4
 -3 6 7 5.03 0.43
 2 -6 -7 96.06 2.99
 -2 -6 7 101.98 3.01
 -2 6 7 100.72 3.03
 2 6 -7 103.43 3.04
 2 6 -7 101.39 3.09
 1 -6 -7 10.55 0.59
 -1 -6 7 9.45 0.56
 1 6 -7 10.45 0.62
 -1 6 7 10.7 0.62
 0 -6 -7 68.25 2.15
 0 -6 7 66.48 2.13
 0 6 7 68.77 2.18
 0 6 -7 63.35 2.13
 -1 -6 -7 9.26 0.58
 1 -6 7 9.16 0.57
 -1 6 -7 8.23 0.59
 1 6 7 8.84 0.61
 2 -6 7 14.2 0.73
 -2 -6 -7 15.12 0.77
 2 6 7 12.97 0.77
 -2 6 -7 14.31 0.75
 3 -6 7 3.63 0.43
 -3 -6 -7 2.8 0.41
 3 6 7 3.54 0.47
 -3 6 -7 3.35 0.44
 -4 -6 -7 2.24 0.38
 4 -6 7 1.66 0.33
 -4 6 -7 1.51 0.34
 4 6 7 2.35 0.42
 5 -6 7 1.37 0.31
 -5 -6 -7 1.69 0.33
 5 6 7 1.4 0.34
 -5 6 -7 1.44 0.33
 -6 -6 -7 0 0.22
 6 -6 7 0.08 0.25
 -6 6 -7 -0.14 0.25
 6 6 7 0.3 0.31
 7 -6 7 0.07 0.26
 -7 -6 -7 0.17 0.27
 -7 6 -7 0.39 0.29
 7 6 7 0.38 0.33
 -8 -6 -7 7.63 0.72
 8 -6 7 7.9 0.68
 8 6 7 7.39 0.73
 9 -6 7 2.15 0.44
 9 6 7 2.34 0.53
 10 -6 7 13.44 0.86
 10 -6 7 12.48 0.87
 10 6 7 12.39 0.98
 11 -6 7 2.01 0.46
 11 -6 7 2.64 0.77
 11 6 7 3.48 0.63
 12 -6 7 8.86 0.83
 12 6 7 10.57 0.99
 18 -7 -7 2.66 0.76
 18 7 -7 3.76 0.86
 17 -7 -7 0.2 0.48
 17 7 -7 -0.06 0.57
 16 -7 -7 14.16 1.09
 16 7 -7 14.56 1.26
 15 -7 -7 2.83 0.64
 15 7 -7 1.72 0.6
 14 -7 -7 25.88 1.45
 14 -7 -7 31.26 1.98
 14 7 -7 29.06 1.14
 14 7 -7 28.22 1.47
 13 -7 -7 3.64 0.6
 13 -7 -7 3.96 0.81
 13 7 -7 3.83 0.45
 13 7 -7 3.11 0.58
 13 7 -7 3.9 0.79
 12 -7 -7 39.27 2.07
 12 -7 -7 37.87 1.68
 12 7 -7 36.26 1.87
 12 7 -7 38.12 1.41
 12 7 -7 38.74 1.64
 11 -7 -7 1.38 0.43
 11 -7 -7 1.07 0.56
 11 -7 -7 1.91 0.27
 11 7 -7 1.85 0.44
 11 7 -7 2.08 0.37
 -11 7 7 1.82 0.46
 11 7 -7 1.59 0.56
 10 -7 -7 60.86 2.04
 10 -7 -7 65.57 2.36
 10 -7 -7 66.73 2.65
 10 7 -7 64.57 2.22
 10 7 -7 64.18 2.55
 10 7 -7 66.38 2.12
 9 -7 -7 0.16 0.39
 9 -7 -7 0.68 0.27
 9 7 -7 0.17 0.26
 9 7 -7 0.45 0.44
 9 7 -7 0.3 0.27
 8 -7 -7 35.93 1.65
 -8 -7 7 30.93 1.21
 8 -7 -7 33.75 1.29
 8 7 -7 31.25 1.26
 8 7 -7 34.47 1.62
 8 7 -7 35.35 1.28
 7 -7 -7 0.18 0.22
 7 -7 -7 0.1 0.33
 -7 -7 7 0.33 0.19
 7 7 -7 0.5 0.42
 -7 7 7 0.32 0.32
 7 7 -7 0.57 0.25
 7 7 -7 0.88 0.26
 -6 -7 7 15.6 0.73
 6 -7 -7 16.1 0.98
 6 -7 -7 15.52 0.76
 6 7 -7 13.75 0.68
 6 7 -7 16.9 1.08
 -6 7 7 14.63 0.78
 6 7 -7 14.83 0.77
 5 -7 -7 0.76 0.33
 5 -7 -7 0.72 0.23
 -5 -7 7 0.62 0.22
 -5 7 7 1.24 0.31
 5 7 -7 0.95 0.3
 5 7 -7 0.42 0.34
 -4 -7 7 -0.02 0.17
 4 -7 -7 0.07 0.17
 4 -7 -7 0.07 0.28
 4 7 -7 -0.08 0.28
 4 7 -7 -0.13 0.19
 -4 7 7 0.18 0.2
 -3 -7 7 1.35 0.27
 3 -7 -7 1.37 0.29
 -3 7 7 1.58 0.32
 3 7 -7 1.23 0.31
 3 7 -7 1.28 0.33
 2 -7 -7 13.49 0.7
 -2 -7 7 13.84 0.71
 -2 7 7 13.93 0.75
 2 7 -7 13.76 0.75
 2 7 -7 12.92 0.78
 -1 -7 7 0.22 0.18
 1 -7 -7 0.25 0.22
 -1 7 7 0.15 0.25
 1 7 -7 0.26 0.23
 1 7 -7 0.22 0.24
 0 -7 7 49.25 1.68
 0 -7 -7 49.44 1.69
 0 7 7 46.99 1.7
 0 7 -7 45.58 1.68
 -1 -7 -7 3.47 0.42
 1 -7 7 3.8 0.44
 -1 7 -7 3.37 0.44
 1 7 7 3.93 0.47
 -2 -7 -7 74.06 2.41
 2 -7 7 71.8 2.39
 2 7 7 73.73 2.45
 -2 7 -7 75.6 2.43
 3 -7 7 7.98 0.57
 -3 -7 -7 7.18 0.62
 -3 7 -7 5.71 0.55
 3 7 7 8.66 0.67
 4 -7 7 76.62 2.61
 -4 -7 -7 83.22 2.67
 -4 7 -7 86.34 2.66
 4 7 7 77.89 2.68
 5 -7 7 19.35 0.96
 -5 -7 -7 19.67 1
 -5 7 -7 19.3 0.98
 5 7 7 18.18 1.02
 -6 -7 -7 53.72 1.92
 6 -7 7 49.01 1.85
 6 7 7 49.12 1.92
 -6 7 -7 53.04 1.9
 7 -7 7 6.03 0.61
 -7 -7 -7 8.53 0.74
 7 7 7 6.82 0.71
 -7 7 -7 7.82 0.7
 -8 -7 -7 27.45 1.31
 8 -7 7 27.7 1.25
 8 7 7 26.86 1.35
 9 -7 7 6.09 0.65
 9 7 7 7.84 0.78
 10 -7 7 5.51 0.65
 10 7 7 7.74 0.84
 11 -7 7 1.1 0.42
 11 7 7 0.5 0.51
 17 -8 -7 -0.01 0.52
 17 8 -7 0.1 0.57
 16 -8 -7 11.06 1.09
 16 8 -7 9.95 1.05
 15 -8 -7 0.15 0.4
 15 8 -7 -0.09 0.46
 15 8 -7 1.13 0.51
 14 -8 -7 2.13 0.59
 14 8 -7 3.1 0.48
 14 8 -7 3.08 0.64
 13 -8 -7 1.35 0.65
 13 -8 -7 0.98 0.48
 13 8 -7 1.03 0.36
 13 8 -7 1.47 0.62
 13 8 -7 1.4 0.48
 12 -8 -7 1.91 0.27
 12 -8 -7 1.76 0.63
 12 -8 -7 1.9 0.52
 12 8 -7 1.79 0.41
 12 8 -7 0.67 0.4
 12 8 -7 1.84 0.59
 11 -8 -7 1.07 0.45
 11 -8 -7 2.1 0.33
 11 -8 -7 2.07 0.62
 11 8 -7 1.39 0.39
 11 8 -7 1.05 0.39
 11 8 -7 1.92 0.58
 10 -8 -7 10.36 1.07
 10 -8 -7 8.23 0.62
 10 8 -7 9.09 0.93
 10 8 -7 9.84 0.71
 10 8 -7 8.77 0.73
 9 -8 -7 11.28 1.07
 9 -8 -7 9.5 0.65
 9 8 -7 7.93 0.66
 9 8 -7 7.16 0.8
 9 8 -7 7.99 0.63
 8 -8 -7 48.23 2.03
 8 -8 -7 50.99 1.77
 -8 -8 7 47.1 1.69
 8 8 -7 50.09 1.99
 8 8 -7 45.3 1.66
 8 8 -7 49.55 1.75
 7 -8 -7 5.12 0.53
 -7 -8 7 6.52 0.5
 7 -8 -7 4.82 0.67
 7 8 -7 5.61 0.57
 7 8 -7 4.86 0.45
 7 8 -7 6.02 0.7
 6 -8 -7 86.55 2.92
 -6 -8 7 83.55 2.65
 6 -8 -7 84.8 2.69
 6 8 -7 84.39 2.7
 6 8 -7 89.27 2.94
 -6 8 7 82.93 2.71
 6 8 -7 79.98 2.53
 5 -8 -7 3.41 0.4
 -5 -8 7 3.06 0.39
 5 -8 -7 3.6 0.52
 5 8 -7 2.84 0.42
 5 8 -7 3.9 0.59
 -5 8 7 3.42 0.45
 4 -8 -7 124.32 3.84
 4 -8 -7 120.61 3.64
 -4 -8 7 121.9 3.64
 4 8 -7 122.72 3.68
 -4 8 7 121 3.67
 4 8 -7 116.25 3.85
 -3 -8 7 1.4 0.3
 3 -8 -7 0.75 0.26
 3 8 -7 0.91 0.32
 3 8 -7 0.74 0.34
 -3 8 7 0.85 0.29
 2 -8 -7 105.36 3.23
 -2 -8 7 108.08 3.24
 2 8 -7 103.12 3.35
 2 8 -7 105.81 3.26
 -2 8 7 102.61 3.25
 1 -8 -7 7.95 0.59
 -1 -8 7 8.91 0.6
 1 8 -7 7.86 0.68
 1 8 -7 8.1 0.69
 -1 8 7 8.92 0.64
 0 -8 7 59.02 2.09
 0 -8 -7 63.02 2.13
 0 8 -7 63.19 2.23
 0 8 7 64.57 2.17
 0 8 -7 62.68 2.14
 1 -8 7 13.82 0.76
 -1 -8 -7 14.86 0.81
 1 8 7 13.88 0.85
 -1 8 -7 13.43 0.79
 -1 8 -7 11.88 0.85
 -2 -8 -7 37.61 1.49
 2 -8 7 39.8 1.48
 2 8 7 37.26 1.53
 -2 8 -7 36.2 1.48
 -3 -8 -7 5.71 0.62
 3 -8 7 4.08 0.48
 3 8 7 4.58 0.59
 -3 8 -7 5.34 0.57
 4 -8 7 3.03 0.46
 -4 -8 -7 2.34 0.43
 4 8 7 2.81 0.51
 -4 8 -7 2.32 0.42
 -5 -8 -7 0.72 0.34
 5 -8 7 1.17 0.35
 5 8 7 0.95 0.42
 -5 8 -7 1.08 0.37
 -6 -8 -7 2.23 0.44
 6 -8 7 2.42 0.43
 -6 8 -7 2.36 0.46
 6 8 7 1.38 0.41
 7 -8 7 1.17 0.35
 -7 -8 -7 2.21 0.46
 7 8 7 0.91 0.44
 -8 -8 -7 14.6 0.98
 8 -8 7 15.85 0.94
 8 8 7 13.97 1.02
 9 -8 7 2.83 0.5
 9 8 7 2.66 0.59
 10 -8 7 16.38 1.02
 10 8 7 17.92 1.24
 11 -8 7 0.93 0.43
 11 8 7 0.86 0.56
 17 -9 -7 0.89 0.56
 17 9 -7 1.03 0.65
 16 -9 -7 21.26 1.4
 16 9 -7 21.67 1.42
 15 -9 -7 2.86 0.67
 15 9 -7 2.93 0.5
 15 9 -7 2.44 0.65
 14 -9 -7 50.66 2.14
 14 9 -7 50.95 1.89
 14 9 -7 49.21 2.11
 13 -9 -7 3.78 0.68
 13 -9 -7 3.67 0.83
 13 9 -7 3.9 0.64
 13 9 -7 4.81 0.61
 12 -9 -7 75.09 2.96
 12 -9 -7 71.6 2.65
 12 -9 -7 65.9 2.2
 12 9 -7 72.62 2.45
 12 9 -7 69.12 2.51
 11 -9 -7 2.84 0.41
 11 -9 -7 3.37 0.71
 11 9 -7 2.42 0.48
 11 9 -7 2.32 0.48
 10 -9 -7 60.48 2.06
 10 -9 -7 61.44 2.47
 10 9 -7 58.15 2.11
 10 9 -7 55.66 2.11
 10 9 -7 59.31 2.36
 9 -9 -7 2.18 0.42
 9 -9 -7 1.55 0.5
 9 9 -7 1.91 0.44
 9 9 -7 2.22 0.51
 8 -9 -7 40.46 1.51
 -8 -9 7 36.59 1.45
 8 -9 -7 36.41 1.69
 8 9 -7 34.99 1.56
 8 9 -7 36.24 1.5
 -7 -9 7 1.72 0.36
 7 -9 -7 1.51 0.37
 7 -9 -7 1.69 0.46
 7 9 -7 1.77 0.43
 7 9 -7 1.31 0.42
 6 -9 -7 20.55 1.12
 -6 -9 7 20.73 0.98
 6 -9 -7 18.9 0.99
 -6 9 7 20.74 1.07
 6 9 -7 21.41 1.12
 6 9 -7 20.13 1.05
 5 -9 -7 2.23 0.39
 -5 -9 7 2.63 0.42
 5 -9 -7 2.92 0.48
 5 9 -7 2.82 0.52
 -5 9 7 2.38 0.42
 5 9 -7 2.54 0.58
 5 9 -7 2.58 0.46
 4 -9 -7 -0.09 0.21
 -4 -9 7 0.19 0.25
 4 -9 -7 0.63 0.29
 4 9 -7 -0.35 0.32
 4 9 -7 0.29 0.33
 -4 9 7 0.54 0.32
 -3 -9 7 1.88 0.36
 3 -9 -7 1.06 0.33
 3 -9 -7 1.79 0.34
 3 9 -7 1.6 0.42
 -3 9 7 1.36 0.38
 3 9 -7 1.97 0.49
 2 -9 -7 11.1 0.71
 -2 -9 7 8.99 0.66
 2 9 -7 9.35 0.8
 -2 9 7 9.73 0.74
 2 9 -7 9.87 0.75
 -1 -9 7 -0.04 0.21
 1 -9 -7 0.49 0.27
 1 9 -7 0.15 0.27
 1 9 -7 0.57 0.36
 -1 9 7 -0.17 0.29
 0 -9 7 39.06 1.52
 0 -9 -7 38.84 1.53
 0 9 -7 37.01 1.62
 0 9 -7 40.17 1.57
 0 9 7 40.97 1.62
 1 -9 7 0.29 0.26
 -1 -9 -7 0.4 0.27
 -1 9 -7 0.49 0.37
 1 9 7 0.07 0.36
 -1 9 -7 0.2 0.32
 2 -9 7 55 2.04
 -2 -9 -7 60.1 2.1
 2 9 7 56.94 2.13
 -2 9 -7 57.63 2.2
 -2 9 -7 58.16 2.1
 3 -9 7 14.48 0.83
 -3 -9 -7 13.27 0.86
 3 9 7 13.35 0.93
 -3 9 -7 11.69 0.81
 -3 9 -7 13.36 0.97
 -4 -9 -7 80.57 2.75
 4 -9 7 80.36 2.71
 4 9 7 82.12 2.81
 -4 9 -7 78.55 2.72
 5 -9 7 5.51 0.63
 -5 -9 -7 6.81 0.72
 5 9 7 7.03 0.77
 -5 9 -7 5.98 0.68
 6 -9 7 69.45 2.46
 -6 -9 -7 71.24 2.53
 -6 9 -7 70.48 2.48
 6 9 7 68.8 2.56
 7 -9 7 15.5 0.97
 -7 -9 -7 15.64 1.01
 7 9 7 13.62 0.99
 8 -9 7 32.93 1.52
 -8 -9 -7 34.91 1.61
 8 9 7 36.44 1.69
 9 -9 7 3.31 0.57
 9 9 7 3.7 0.7
 10 -9 7 12 0.94
 10 9 7 11.84 1.1
 16 -10 -7 17.69 1.33
 15 -10 -7 0.95 0.56
 15 10 -7 -0.38 0.39
 14 -10 -7 8.56 0.95
 14 10 -7 8.13 0.81
 13 -10 -7 1.02 0.5
 13 10 -7 0.63 0.44
 12 -10 -7 -0.3 0.48
 12 -10 -7 -0.06 0.25
 12 10 -7 0.6 0.42
 11 -10 -7 3.45 0.69
 11 -10 -7 2.51 0.43
 11 10 -7 1.68 0.49
 10 -10 -7 22.33 1.1
 10 -10 -7 21.17 1.31
 10 10 -7 19.29 1.13
 9 -10 -7 11.13 0.94
 9 -10 -7 10.8 0.76
 9 10 -7 9.01 0.85
 8 -10 -7 45.21 1.71
 8 -10 -7 41.72 1.85
 -8 -10 7 41.86 1.68
 8 10 -7 44.13 1.77
 7 -10 -7 3.52 0.5
 7 -10 -7 3.2 0.52
 -7 -10 7 3.23 0.47
 7 10 -7 3.05 0.52
 -6 -10 7 97.47 2.98
 6 -10 -7 90.11 3.03
 6 -10 -7 84.43 2.95
 -6 10 7 88.44 3.13
 6 10 -7 89.14 3
 -5 -10 7 3.42 0.5
 5 -10 -7 3.72 0.52
 5 -10 -7 3.47 0.52
 5 10 -7 3.23 0.53
 -5 10 7 3.18 0.52
 4 -10 -7 125.57 3.97
 4 -10 -7 129.57 4
 -4 -10 7 129.04 3.99
 -4 10 7 128.63 4.03
 4 10 -7 133.8 4.06
 4 10 -7 127.11 4.25
 3 -10 -7 1.22 0.35
 -3 -10 7 1.01 0.35
 3 -10 -7 1.04 0.34
 3 10 -7 1.13 0.42
 -3 10 7 1.32 0.41
 3 10 -7 1.52 0.5
 -2 -10 7 121.47 3.78
 2 -10 -7 120.74 3.78
 2 10 -7 124.92 3.84
 -2 10 7 119.39 3.82
 2 10 -7 117.46 3.96
 -1 -10 7 12.22 0.81
 1 -10 -7 12.27 0.82
 -1 10 7 11.8 0.89
 1 10 -7 13.27 0.97
 1 10 -7 12.92 0.9
 0 -10 7 75.11 2.54
 0 -10 -7 73.93 2.53
 0 10 -7 69.68 2.66
 0 10 7 74.3 2.58
 0 10 -7 74.62 2.57
 -1 -10 -7 9.85 0.83
 1 -10 7 6.26 0.67
 -1 10 -7 8.88 0.88
 -1 10 -7 7.45 0.73
 1 10 7 8.94 0.84
 2 -10 7 17.66 1.01
 -2 -10 -7 17.47 1.02
 -2 10 -7 18.93 1.16
 -2 10 -7 17.23 1.06
 2 10 7 18.23 1.11
 3 -10 7 7.41 0.72
 -3 -10 -7 5.96 0.66
 3 10 7 7.58 0.79
 -3 10 -7 8.14 0.87
 -3 10 -7 9.64 0.83
 -4 -10 -7 3.91 0.59
 4 -10 7 2.73 0.49
 4 10 7 2.85 0.58
 -4 10 -7 3.49 0.58
 -4 10 -7 4.07 0.7
 -5 -10 -7 3.57 0.57
 5 -10 7 3.06 0.52
 -5 10 -7 2.01 0.49
 -5 10 -7 2.55 0.64
 5 10 7 3.23 0.6
 6 -10 7 2.62 0.52
 -6 -10 -7 2.24 0.52
 6 10 7 3.6 0.67
 -6 10 -7 3.2 0.59
 -6 10 -7 3.09 0.68
 -7 -10 -7 0.39 0.4
 7 -10 7 -0.13 0.33
 7 10 7 0.51 0.44
 -8 -10 -7 11.55 1.02
 8 -10 7 15.61 1.01
 8 10 7 13.94 1.18
 9 -10 7 0.12 0.38
 9 10 7 -0.54 0.48
 10 -10 7 21.52 1.24
 10 10 7 21.63 1.45
 15 -11 -7 2.93 0.7
 15 11 -7 1.1 0.52
 14 11 -7 50.26 2.02
 13 11 -7 4.44 0.67
 12 -11 -7 67.43 2.32
 12 11 -7 70.68 2.55
 11 -11 -7 5.56 0.82
 11 -11 -7 4.79 0.59
 11 11 -7 4.67 0.71
 10 -11 -7 67.38 2.59
 10 -11 -7 65.48 2.32
 10 11 -7 61.45 2.4
 9 -11 -7 3.47 0.62
 9 -11 -7 3.09 0.51
 9 11 -7 2.21 0.57
 8 -11 -7 34.61 1.46
 -8 -11 7 31.48 1.76
 8 -11 -7 33.41 1.55
 8 11 -7 31.5 1.56
 7 -11 -7 2.46 0.45
 7 -11 -7 2.34 0.49
 -7 -11 7 2.2 0.48
 7 11 -7 2.25 0.56
 6 -11 -7 8.48 0.77
 -6 -11 7 9.76 0.77
 6 -11 -7 10.41 0.76
 6 11 -7 8.49 0.85
 5 -11 -7 3.58 0.74
 -5 -11 7 4.92 0.61
 5 -11 -7 3.74 0.54
 -5 11 7 3.97 0.61
 5 11 -7 4.16 0.64
 4 -11 -7 0.48 0.32
 -4 -11 7 1.18 0.35
 4 11 -7 0.66 0.39
 -4 11 7 1.44 0.45
 4 11 -7 1.04 0.52
 -3 -11 7 1.27 0.36
 3 -11 -7 1.37 0.39
 3 11 -7 1.55 0.49
 -3 11 7 1.1 0.42
 3 11 -7 1.4 0.53
 2 -11 -7 11.56 0.84
 -2 -11 7 10.66 0.79
 2 11 -7 11.67 0.89
 -2 11 7 12.81 0.96
 2 11 -7 12.58 1.04
 1 -11 -7 7.04 0.74
 -1 -11 7 6.49 0.72
 1 11 -7 5.39 0.72
 1 11 -7 4.3 0.71
 -1 11 7 6.17 0.74
 0 -11 7 34.79 1.49
 0 -11 -7 33.82 1.5
 0 11 -7 31.43 1.5
 0 11 7 35.16 1.59
 0 11 -7 30.28 1.58
 -1 -11 -7 3.04 0.51
 1 -11 7 3.08 0.53
 -1 11 -7 2.25 0.52
 1 11 7 2.36 0.53
 -1 11 -7 2.92 0.59
 -2 -11 -7 72.72 2.61
 2 -11 7 76.69 2.64
 -2 11 -7 71.28 2.64
 -2 11 -7 71.52 2.77
 2 11 7 73.28 2.68
 -3 -11 -7 6.14 0.72
 3 -11 7 4.79 0.61
 3 11 7 5.72 0.78
 -3 11 -7 5.37 0.75
 -3 11 -7 4.89 0.65
 -4 -11 -7 88.26 3.1
 4 -11 7 89.7 3.07
 -4 11 -7 89.1 3.26
 4 11 7 86.83 3.15
 -4 11 -7 90.18 3.1
 -5 -11 -7 22.47 1.26
 5 -11 7 20.95 1.2
 -5 11 -7 18.97 1.21
 -5 11 -7 22.29 1.4
 5 11 7 19.81 1.28
 -6 -11 -7 80.36 2.88
 6 -11 7 76.15 2.8
 -6 11 -7 78.01 2.86
 -6 11 -7 76.86 3
 6 11 7 78.87 2.93
 -7 -11 -7 5.02 0.71
 7 -11 7 6.06 0.75
 7 11 7 5.7 0.83
 -7 11 -7 5.92 0.93
 -8 -11 -7 44.48 2.18
 8 -11 7 48.61 2.02
 -8 11 -7 48.52 2.26
 8 11 7 45.74 2.13
 9 -11 7 5.27 0.73
 9 11 7 8.03 1.04
 -9 11 -7 8.02 1.03
 15 12 -7 -0.01 0.47
 14 12 -7 1.32 0.57
 13 12 -7 0.3 0.5
 12 -12 -7 2.28 0.47
 12 12 -7 0.87 0.56
 11 -12 -7 6.27 0.68
 11 12 -7 6.01 0.81
 10 -12 -7 13.41 0.94
 10 12 -7 11.87 1.08
 9 -12 -7 12.05 0.88
 9 12 -7 7.16 0.87
 8 -12 -7 75.83 2.6
 8 12 -7 69.2 2.68
 7 -12 -7 5.58 0.67
 -7 -12 7 4.3 0.62
 7 12 -7 3.98 0.68
 -6 -12 7 67.71 2.48
 6 -12 -7 69.99 2.47
 6 12 -7 65.95 2.55
 -5 -12 7 0.45 0.32
 5 -12 -7 0.38 0.34
 -5 12 7 0.16 0.41
 5 12 -7 0.62 0.49
 -4 -12 7 113.81 3.74
 4 -12 -7 114.8 3.75
 4 12 -7 119.83 4.05
 -4 12 7 110.64 3.78
 4 12 -7 111.63 3.78
 -3 -12 7 -0.05 0.31
 3 -12 -7 0.09 0.33
 3 12 -7 0.85 0.56
 -3 12 7 -0.51 0.39
 3 12 -7 0.31 0.44
 2 -12 -7 77.6 2.77
 -2 -12 7 82.16 2.79
 2 12 -7 74.02 2.81
 -2 12 7 78.62 2.83
 2 12 -7 74.75 2.98
 -1 -12 7 0.08 0.31
 1 -12 -7 -0.2 0.32
 1 12 -7 -0.48 0.44
 1 12 -7 0.34 0.42
 -1 12 7 -0.52 0.4
 0 -12 7 64.7 2.36
 0 -12 -7 61.25 2.34
 0 12 7 63.13 2.44
 0 12 -7 55.61 2.47
 0 12 -7 60.23 2.39
 -1 -12 -7 8.39 0.82
 1 -12 7 8.7 0.82
 1 12 7 8.1 0.86
 -1 12 -7 8.01 0.84
 -1 12 -7 9.41 1
 -2 -12 -7 35.45 1.64
 2 -12 7 36.34 1.66
 2 12 7 34.75 1.7
 -2 12 -7 35.42 1.83
 -2 12 -7 35.92 1.72
 -3 -12 -7 9.41 0.91
 3 -12 7 8.87 0.88
 3 12 7 10.83 1.06
 -3 12 -7 8.33 0.9
 -3 12 -7 9.05 1.02
 4 -12 7 4.66 0.65
 -4 -12 -7 6.95 0.83
 -4 12 -7 5.19 0.85
 4 12 7 4.99 0.8
 -4 12 -7 5.67 0.77
 -5 -12 -7 1.83 0.57
 5 -12 7 2.77 0.6
 -5 12 -7 1.74 0.59
 -5 12 -7 2.12 0.67
 5 12 7 1.8 0.64
 -6 -12 -7 1.94 0.59
 6 -12 7 1.99 0.53
 -6 12 -7 1.8 0.68
 6 12 7 3.07 0.75
 -7 -12 -7 0.92 0.52
 7 -12 7 1.44 0.52
 7 12 7 1.49 0.68
 -7 12 -7 0.94 0.61
 8 -12 7 15.12 1.14
 8 12 7 13.45 1.28
 -8 12 -7 14.87 1.42
 14 13 -7 55.11 2.31
 13 -13 -7 1.8 0.7
 13 13 -7 1.49 0.62
 12 -13 -7 65.95 2.38
 12 13 -7 64.93 2.58
 11 -13 -7 6.83 0.73
 11 13 -7 6.73 0.9
 10 -13 -7 71.29 2.55
 10 13 -7 67.7 2.71
 9 -13 -7 1.26 0.46
 9 13 -7 1.19 0.59
 8 -13 -7 43.96 1.82
 8 13 -7 39.53 1.91
 7 -13 -7 -0.26 0.31
 -7 -13 7 0.12 0.35
 7 13 -7 0.3 0.53
 -6 -13 7 17.93 1.14
 6 -13 -7 20.75 1.15
 6 13 -7 18.5 1.28
 -5 -13 7 3.14 0.6
 5 -13 -7 2.35 0.51
 5 13 -7 2.4 0.63
 4 -13 -7 4.78 0.68
 -4 -13 7 3.52 0.6
 -4 13 7 5.13 0.78
 4 13 -7 4.6 0.76
 3 -13 -7 2.1 0.53
 -3 -13 7 2.86 0.55
 3 13 -7 1.3 0.55
 -3 13 7 1.87 0.62
 3 13 -7 2.35 0.68
 2 -13 -7 2.39 0.56
 -2 -13 7 2.4 0.51
 2 13 -7 2.39 0.58
 -2 13 7 3.54 0.7
 2 13 -7 2.66 0.72
 -1 -13 7 0.63 0.38
 1 -13 -7 0.83 0.4
 -1 13 7 0.68 0.48
 1 13 -7 1.14 0.52
 1 13 -7 0.89 0.6
 0 -13 7 40.59 1.85
 0 -13 -7 43.12 1.88
 0 13 -7 40.48 2.08
 0 13 7 43.02 1.95
 0 13 -7 42.54 1.97
 1 -13 7 0.7 0.45
 -1 -13 -7 1.01 0.47
 -1 13 -7 0.81 0.6
 1 13 7 -0.26 0.5
 -1 13 -7 0.4 0.53
 -2 -13 -7 67.55 2.58
 2 -13 7 64.19 2.54
 2 13 7 64.05 2.64
 -2 13 -7 64.98 2.6
 -2 13 -7 63.74 2.76
 -3 -13 -7 6.14 0.78
 3 -13 7 7.18 0.85
 -3 13 -7 4.95 0.78
 -3 13 -7 5.29 0.85
 3 13 7 6.91 0.9
 4 -13 7 73.62 2.84
 -4 -13 -7 80.78 2.92
 4 13 7 78.23 2.99
 -4 13 -7 70.29 3
 -4 13 -7 72.8 2.87
 5 -13 7 10.38 1.04
 -5 -13 -7 7.91 0.92
 -5 13 -7 8.04 1.09
 5 13 7 7.74 1.01
 -5 13 -7 9.1 1.03
 6 -13 7 73.32 2.83
 -6 -13 -7 74.45 2.88
 -6 13 -7 72.59 3.06
 6 13 7 69.69 2.92
 -7 -13 -7 4.4 0.76
 7 -13 7 5.22 0.84
 7 13 7 4.43 0.9
 -7 13 -7 5.96 0.97
 13 14 -7 7.83 1
 12 -14 -7 0.27 0.43
 12 14 -7 0.71 0.62
 11 -14 -7 5.81 0.73
 11 14 -7 5.82 0.88
 10 -14 -7 19 1.18
 10 14 -7 18.51 1.4
 9 -14 -7 8.31 0.84
 9 14 -7 6.14 0.88
 8 -14 -7 53.41 2.1
 8 14 -7 46.05 2.18
 -7 -14 7 9.41 0.91
 7 -14 -7 8.8 0.86
 7 14 -7 7.76 0.97
 6 -14 -7 65.25 2.43
 -6 -14 7 62.96 2.48
 6 14 -7 61.39 2.56
 5 -14 -7 1.46 0.44
 -5 -14 7 0.61 0.43
 5 14 -7 1.43 0.61
 4 -14 -7 51.1 2.12
 -4 -14 7 48.04 2.12
 4 14 -7 50.92 2.26
 -4 14 7 55.19 2.24
 -3 -14 7 0.49 0.38
 3 -14 -7 0.14 0.4
 3 14 -7 0.08 0.47
 -3 14 7 0.56 0.56
 3 14 -7 0.62 0.62
 2 -14 -7 69.61 2.7
 -2 -14 7 70.12 2.7
 -2 14 7 72.12 2.82
 2 14 -7 68.71 2.95
 2 14 -7 69.53 2.79
 -1 -14 7 7.09 0.89
 1 -14 -7 9.2 0.95
 1 14 -7 7.16 0.97
 1 14 -7 8.39 1.11
 -1 14 7 7.97 1
 0 -14 -7 48.38 2.12
 0 -14 7 45.86 2.06
 0 14 7 48.93 2.22
 0 14 -7 42.47 2.13
 0 14 -7 47.25 2.34
 -1 -14 -7 4.93 0.77
 1 -14 7 3.64 0.69
 -1 14 -7 4.76 0.92
 1 14 7 4.32 0.81
 -1 14 -7 5.61 0.89
 2 -14 7 28.63 1.58
 -2 -14 -7 28.67 1.6
 2 14 7 28.65 1.66
 -2 14 -7 28.25 1.67
 -2 14 -7 26.02 1.71
 -3 -14 -7 7.16 0.93
 3 -14 7 6.4 0.82
 -3 14 -7 6.54 1.07
 3 14 7 7.71 1.1
 -3 14 -7 5.53 0.84
 4 -14 7 3.29 0.69
 -4 -14 -7 3.55 0.73
 4 14 7 4.33 0.87
 -4 14 -7 4 0.93
 -4 14 -7 3.69 0.77
 -5 -14 -7 4.03 0.79
 5 -14 7 3.01 0.66
 5 14 7 3.68 0.95
 -5 14 -7 2.33 0.85
 -5 14 -7 4.82 0.92
 -6 -14 -7 1.27 0.58
 6 -14 7 1.42 0.58
 -6 14 -7 2.19 0.75
 6 14 7 3.36 0.84
 11 -15 -7 0.24 0.42
 11 15 -7 0.52 0.65
 10 -15 -7 59.48 2.36
 10 15 -7 60.16 2.6
 9 -15 -7 0.46 0.43
 9 15 -7 -0.31 0.54
 8 -15 -7 32.56 1.58
 8 15 -7 29.67 1.74
 -7 -15 7 0.04 0.41
 7 -15 -7 0.85 0.44
 7 15 -7 0.37 0.59
 -6 -15 7 6.12 0.8
 6 -15 -7 6.9 0.81
 6 15 -7 7.01 0.96
 -5 -15 7 1.11 0.5
 5 -15 -7 1.53 0.52
 5 15 -7 2.24 0.68
 -4 -15 7 1.18 0.52
 4 -15 -7 1.97 0.55
 4 15 -7 0.66 0.57
 -3 -15 7 3.95 0.71
 3 -15 -7 5.53 0.76
 3 15 -7 4.93 0.85
 -3 15 7 5.47 0.86
 2 -15 -7 5.61 0.81
 -2 -15 7 5.98 0.83
 2 15 -7 4.99 0.93
 -2 15 7 7.22 0.99
 2 15 -7 4.58 0.9
 -1 -15 7 2.23 0.62
 1 -15 -7 1.69 0.56
 -1 15 7 0.82 0.63
 1 15 -7 1.28 0.66
 1 15 -7 1.97 0.73
 0 -15 -7 23.86 1.49
 0 -15 7 23.73 1.47
 0 15 7 26.99 1.68
 0 15 -7 21.75 1.5
 0 15 -7 23.32 1.73
 -1 -15 -7 0.15 0.41
 1 -15 7 0.04 0.43
 1 15 7 0.2 0.54
 -1 15 -7 0.28 0.59
 -1 15 -7 0.64 0.65
 2 -15 7 50.23 2.27
 -2 -15 -7 48.69 2.25
 -2 15 -7 52.06 2.4
 2 15 7 48 2.33
 -2 15 -7 48.53 2.47
 -3 -15 -7 0.06 0.53
 3 -15 7 -0.19 0.47
 -3 15 -7 1 0.66
 -3 15 -7 -0.04 0.68
 3 15 7 0.38 0.7
 4 -15 7 59.3 2.6
 -4 -15 -7 62.3 2.66
 -4 15 -7 55.44 2.63
 -4 15 -7 63.12 2.93
 4 15 7 62.29 2.77
 -5 -15 -7 3.52 0.84
 5 -15 7 2.45 0.68
 -5 15 -7 2.39 0.93
 5 15 7 4.19 1
 9 -16 -7 4.59 0.72
 9 16 -7 4.65 0.88
 8 -16 -7 35.87 1.75
 8 16 -7 38.48 2
 7 -16 -7 5.31 0.75
 7 16 -7 4.96 0.94
 6 -16 -7 55.14 2.24
 -6 -16 7 52.85 2.3
 6 16 -7 50.15 2.41
 5 -16 -7 1.34 0.55
 -5 -16 7 1.46 0.55
 5 16 -7 0.39 0.58
 4 -16 -7 57.72 2.4
 -4 -16 7 59.83 2.5
 3 -16 -7 0.18 0.43
 -3 -16 7 0.54 0.51
 -3 16 7 0.85 0.64
 3 16 -7 -0.52 0.57
 -2 -16 7 43.37 2.07
 2 -16 -7 42.42 2.05
 -2 16 7 48.06 2.22
 2 16 -7 46.29 2.27
 -1 -16 7 1.26 0.58
 1 -16 -7 0.83 0.55
 -1 16 7 0.59 0.62
 1 16 -7 0.81 0.66
 1 16 -7 0.61 0.74
 0 -16 7 41.74 2.04
 0 -16 -7 39.15 2.02
 0 16 7 41.71 2.18
 0 16 -7 37.21 2.06
 0 16 -7 42.57 2.35
 -1 -16 -7 6.83 0.97
 1 -16 7 5.85 0.87
 -1 16 -7 5.67 0.94
 1 16 7 4.67 0.95
 -1 16 -7 6.43 1.16
 2 -16 7 13.28 1.27
 -2 -16 -7 10.19 1.14
 2 16 7 12.2 1.33
 -2 16 -7 14.09 1.47
 -2 16 -7 10.72 1.27
 3 -16 7 5.66 0.95
 -3 -16 -7 8.21 1.09
 -3 16 -7 5.61 1.01
 3 16 7 7.39 1.17
 -3 16 -7 9.46 1.37
 7 -17 -7 0.62 0.51
 7 17 -7 1.26 0.73
 6 -17 -7 6.69 0.85
 -6 -17 7 7.79 0.96
 6 17 -7 8.15 1.11
 -5 -17 7 1.2 0.55
 5 -17 -7 1.71 0.58
 5 17 -7 2.09 0.75
 4 -17 -7 0.03 0.47
 -4 -17 7 0.64 0.57
 4 17 -7 -0.34 0.63
 -3 -17 7 1.42 0.62
 3 -17 -7 1.49 0.56
 3 17 -7 1.42 0.77
 2 -17 -7 6.94 0.94
 -2 -17 7 7.48 1.01
 2 17 -7 6.96 1.12
 -2 17 7 7.97 1.14
 -1 -17 7 1.23 0.59
 1 -17 -7 0.2 0.52
 1 17 -7 -0.04 0.64
 -1 17 7 0.66 0.71
 0 -17 7 22.47 1.51
 0 -17 -7 18.29 1.41
 0 17 7 18.56 1.58
 0 17 -7 21.09 1.66
 0 17 -7 17.39 1.69
 1 -17 7 0.24 0.54
 -1 -17 -7 -0.15 0.54
 1 17 7 -0.66 0.67
 -1 17 -7 0.53 0.8
 -1 17 -7 0.14 0.64
 19 0 -8 0.11 0.61
 18 0 -8 61.98 2.63
 17 0 -8 -0.02 0.5
 16 0 -8 70.93 3.54
 16 0 -8 80.33 2.9
 15 0 -8 -0.31 0.4
 15 0 -8 -0.73 0.62
 14 0 -8 31.52 2.19
 14 0 -8 35.73 1.61
 13 0 -8 -0.17 0.53
 13 0 -8 -0.36 0.3
 12 0 -8 17.06 1.64
 12 0 -8 18.26 1.05
 11 0 -8 0.1 0.56
 11 0 -8 0.19 0.27
 10 0 -8 1.59 0.66
 10 0 -8 1.84 0.41
 9 0 -8 -0.31 0.37
 9 0 -8 -0.06 0.25
 9 0 -8 0.03 0.07
 8 0 -8 75.9 3.05
 8 0 -8 81.63 2.26
 8 0 -8 83.77 2.68
 7 0 -8 0.05 0.09
 7 0 -8 0.03 0.24
 7 0 -8 0.06 0.33
 6 0 -8 42.36 1.28
 -6 0 8 41.99 1.28
 5 0 -8 0.16 0.11
 -5 0 8 0.07 0.09
 -4 0 8 713.72 19.18
 4 0 -8 690.09 18.77
 -3 0 8 0.13 0.12
 3 0 -8 0.1 0.13
 2 0 -8 395.61 10.9
 -2 0 8 409.15 10.91
 1 0 -8 0.01 0.14
 -1 0 8 -0.02 0.13
 0 0 -8 351.99 9.68
 0 0 8 356.12 9.68
 1 0 8 0.05 0.14
 -1 0 -8 -0.2 0.14
 -2 0 -8 239.16 6.56
 2 0 8 228.14 6.54
 3 0 8 0.1 0.19
 -3 0 -8 0.09 0.19
 4 0 8 48.49 1.71
 -4 0 -8 50.15 1.72
 -5 0 -8 -0.03 0.19
 5 0 8 0.19 0.2
 -6 0 -8 0.13 0.25
 6 0 8 0.66 0.29
 7 0 8 -0.01 0.25
 -7 0 -8 0.07 0.23
 8 0 8 8.66 0.68
 -8 0 -8 7.54 0.66
 9 0 8 0.07 0.3
 10 0 8 37.95 1.61
 11 0 8 0.06 0.35
 12 0 8 34.72 1.6
 19 -1 -8 0.32 0.58
 19 1 -8 0.23 0.64
 18 -1 -8 2.33 0.64
 18 1 -8 2.14 0.64
 17 -1 -8 0 0.41
 17 1 -8 -0.22 0.46
 16 -1 -8 3.07 1.03
 16 -1 -8 5.42 0.76
 16 1 -8 3.94 0.66
 16 1 -8 7.31 1.37
 15 -1 -8 1.14 0.49
 15 -1 -8 -0.48 0.72
 15 1 -8 0.54 0.81
 15 1 -8 0.38 0.45
 14 -1 -8 58.04 2.24
 14 -1 -8 57.2 2.91
 14 1 -8 54.36 2.84
 14 1 -8 57.56 2.23
 13 -1 -8 -0.37 0.52
 13 -1 -8 0.38 0.35
 13 1 -8 -0.01 0.36
 13 1 -8 -0.37 0.54
 12 -1 -8 88.79 2.95
 12 -1 -8 83.29 3.55
 12 1 -8 81.58 3.56
 12 1 -8 90.8 2.95
 11 -1 -8 1.06 0.56
 11 -1 -8 1.43 0.39
 11 1 -8 1.63 0.41
 11 1 -8 2.05 0.71
 10 -1 -8 119.17 3.71
 10 -1 -8 116.62 4.27
 10 1 -8 121.54 3.7
 10 1 -8 115.57 4.29
 10 1 -8 117.34 3.2
 9 -1 -8 0.52 0.31
 9 -1 -8 0.6 0.09
 9 -1 -8 0.1 0.47
 9 1 -8 0.09 0.48
 9 1 -8 0.6 0.11
 9 1 -8 0.59 0.31
 8 -1 -8 139.53 4.19
 8 -1 -8 140.96 3.75
 8 1 -8 135.59 3.75
 8 1 -8 121.97 4.55
 8 1 -8 143.95 4.17
 7 -1 -8 6.34 0.31
 7 -1 -8 5.61 0.81
 -7 -1 8 6.07 0.3
 7 1 -8 6.72 0.62
 7 1 -8 5.95 0.82
 7 1 -8 5.96 0.31
 6 -1 -8 216.4 5.82
 -6 -1 8 208.79 5.82
 6 1 -8 209.66 5.83
 -6 1 8 219.75 5.83
 -5 -1 8 4.94 0.29
 5 -1 -8 4.57 0.29
 5 1 -8 4.56 0.3
 -5 1 8 4.25 0.28
 4 -1 -8 43.78 1.33
 -4 -1 8 40.53 1.31
 -4 1 8 42.49 1.32
 4 1 -8 40.94 1.32
 3 -1 -8 -0.02 0.12
 -3 -1 8 0.09 0.12
 3 1 -8 0.14 0.13
 -3 1 8 0.12 0.11
 2 -1 -8 14.12 0.6
 -2 -1 8 12.57 0.58
 -2 1 8 14.1 0.6
 2 1 -8 11.99 0.58
 -1 -1 8 0.33 0.15
 1 -1 -8 0.15 0.14
 -1 1 8 0.09 0.13
 1 1 -8 0.17 0.15
 0 -1 8 82.63 2.45
 0 -1 -8 78.6 2.44
 0 1 8 80.15 2.44
 0 1 -8 81.79 2.45
 1 -1 8 2.18 0.3
 -1 -1 -8 2.61 0.33
 1 1 8 2.9 0.34
 -1 1 -8 2.68 0.34
 2 -1 8 147.37 4.4
 -2 -1 -8 157.3 4.43
 -2 1 -8 157.48 4.43
 2 1 8 150.45 4.41
 3 -1 8 -0.01 0.19
 -3 -1 -8 0.11 0.18
 -3 1 -8 0.14 0.2
 3 1 8 -0.07 0.19
 -4 -1 -8 278.91 7.69
 4 -1 8 267.25 7.67
 4 1 8 273.98 7.68
 -4 1 -8 276.3 7.69
 -5 -1 -8 0.03 0.22
 5 -1 8 0.36 0.24
 5 1 8 0.81 0.27
 -5 1 -8 -0.13 0.17
 -6 -1 -8 252.84 7.08
 6 -1 8 245.98 7.07
 -6 1 -8 248.8 7.07
 6 1 8 247.76 7.08
 -7 -1 -8 1.1 0.33
 7 -1 8 0.79 0.3
 7 1 8 0.23 0.28
 -7 1 -8 0.54 0.26
 8 -1 8 112.34 3.56
 -8 -1 -8 116.4 3.57
 8 1 8 111.85 3.57
 -8 1 -8 116.27 3.72
 9 -1 8 0.6 0.34
 9 1 8 1.39 0.4
 10 -1 8 44.72 1.8
 10 1 8 46.4 1.82
 11 -1 8 0.03 0.34
 11 1 8 -0.21 0.34
 12 -1 8 12.68 0.96
 12 1 8 12.03 0.95
 19 -2 -8 -0.13 0.48
 19 2 -8 0.86 0.66
 18 -2 -8 67.81 2.79
 18 2 -8 69.53 2.82
 17 -2 -8 0.34 0.46
 17 2 -8 0.98 0.6
 16 -2 -8 31.62 2.34
 16 -2 -8 32.36 1.63
 16 2 -8 27.88 1.57
 16 2 -8 29.6 2.16
 15 -2 -8 0.98 0.5
 15 -2 -8 1.47 0.88
 15 2 -8 1.68 0.52
 15 2 -8 1.16 0.78
 14 -2 -8 43.49 2.57
 14 -2 -8 45.2 1.88
 14 2 -8 45.65 1.9
 14 2 -8 41.78 2.5
 13 -2 -8 1.44 0.67
 13 -2 -8 0.2 0.34
 13 2 -8 1.04 0.75
 13 2 -8 0.77 0.38
 12 -2 -8 9.12 1.21
 12 -2 -8 10.27 0.81
 12 2 -8 10.25 0.81
 12 2 -8 8.91 1.17
 11 -2 -8 0.47 0.52
 11 -2 -8 -0.03 0.29
 11 2 -8 -0.06 0.59
 11 2 -8 0.24 0.08
 11 2 -8 0.15 0.3
 10 -2 -8 1.66 0.41
 10 -2 -8 2.24 0.68
 10 2 -8 1.97 0.41
 10 2 -8 2.25 0.7
 10 2 -8 2.15 0.17
 9 -2 -8 0.56 0.46
 9 -2 -8 0.55 0.11
 9 -2 -8 1.07 0.34
 9 2 -8 0.91 0.33
 9 2 -8 0.65 0.56
 9 2 -8 0.65 0.12
 8 -2 -8 16.11 0.91
 8 -2 -8 16.29 1.16
 8 -2 -8 16.09 0.56
 8 2 -8 16.73 0.59
 8 2 -8 14.55 1.2
 8 2 -8 16.91 0.89
 -7 -2 8 5.31 0.29
 7 -2 -8 6.19 0.82
 7 2 -8 5.03 0.3
 7 2 -8 5.56 0.57
 7 2 -8 4.29 0.71
 -6 -2 8 238 6.57
 6 -2 -8 243.4 6.57
 6 2 -8 237.35 6.53
 6 2 -8 241.47 6.58
 -6 2 8 246.02 6.58
 -5 -2 8 0.6 0.14
 5 -2 -8 0.77 0.16
 -5 2 8 0.78 0.16
 5 2 -8 0.64 0.16
 4 -2 -8 271.8 7.53
 -4 -2 8 271.47 7.53
 4 2 -8 281 7.55
 -4 2 8 280.03 7.54
 -3 -2 8 19.43 0.75
 3 -2 -8 19.72 0.75
 -3 2 8 19.99 0.75
 3 2 -8 18.27 0.75
 -2 -2 8 633.95 16.73
 2 -2 -8 608.07 16.71
 -2 2 8 620.02 16.72
 2 2 -8 624.31 16.73
 1 -2 -8 5.58 0.38
 -1 -2 8 5.19 0.38
 1 2 -8 6.34 0.42
 -1 2 8 5.76 0.4
 0 -2 -8 429.39 11.62
 0 -2 8 432.16 11.62
 0 2 8 420.93 11.62
 0 2 -8 425.44 11.63
 -1 -2 -8 0.67 0.2
 1 -2 8 0.6 0.19
 1 2 8 0.96 0.22
 -1 2 -8 1.09 0.24
 -2 -2 -8 254.1 7.09
 2 -2 8 250.81 7.08
 -2 2 -8 260.37 7.1
 2 2 8 249.57 7.09
 -3 -2 -8 4.75 0.45
 3 -2 8 5.65 0.49
 3 2 8 5.01 0.45
 -3 2 -8 5.15 0.47
 -4 -2 -8 68.03 2.25
 4 -2 8 70.85 2.25
 4 2 8 67.64 2.24
 -4 2 -8 69.71 2.25
 -5 -2 -8 -0.01 0.21
 5 -2 8 0.08 0.2
 -5 2 -8 -0.07 0.21
 5 2 8 0.26 0.24
 6 -2 8 2.52 0.41
 -6 -2 -8 2.49 0.4
 -6 2 -8 2.77 0.43
 6 2 8 1.85 0.36
 -7 -2 -8 3.88 0.49
 7 -2 8 4.7 0.51
 7 2 8 4.51 0.51
 -7 2 -8 3.8 0.47
 8 -2 8 12.32 0.78
 -8 -2 -8 10.22 0.73
 8 2 8 10.34 0.78
 9 -2 8 0.98 0.36
 9 2 8 0.55 0.36
 10 -2 8 30.92 1.39
 10 2 8 31.93 1.44
 11 -2 8 0.64 0.39
 11 2 8 0.52 0.42
 12 -2 8 39.28 1.71
 12 2 8 42.43 1.79
 19 -3 -8 -0.14 0.55
 19 3 -8 1.07 0.69
 18 -3 -8 -0.15 0.51
 18 3 -8 0.34 0.57
 17 -3 -8 1.16 0.52
 17 3 -8 0.98 0.6
 16 -3 -8 16.24 1.82
 16 -3 -8 12.4 1.12
 16 3 -8 14.14 1.57
 16 3 -8 13.9 1.19
 15 -3 -8 1.39 0.46
 15 -3 -8 1.2 0.89
 15 3 -8 1.23 0.77
 15 3 -8 1.6 0.5
 14 -3 -8 47.86 2.67
 14 -3 -8 51.17 2.03
 14 3 -8 47.84 2
 14 3 -8 47.61 2.63
 13 -3 -8 3.44 0.85
 13 -3 -8 3.25 0.54
 13 3 -8 3.54 0.94
 13 3 -8 3.7 0.59
 12 -3 -8 63.38 2.31
 12 -3 -8 60.35 2.85
 12 3 -8 66.4 2.31
 12 3 -8 63.76 2.9
 12 3 -8 60.64 1.75
 11 -3 -8 2.61 0.49
 11 -3 -8 4.51 0.91
 11 3 -8 3.25 0.81
 11 3 -8 3.12 0.22
 11 3 -8 2.53 0.45
 10 -3 -8 198.47 5.71
 10 -3 -8 189.79 6.21
 10 3 -8 187.02 6.22
 10 3 -8 191.4 5.21
 10 3 -8 189.03 5.62
 9 -3 -8 5.93 0.64
 9 -3 -8 4.61 0.76
 9 -3 -8 5.21 0.3
 9 3 -8 5.07 0.56
 9 3 -8 4.73 0.3
 9 3 -8 3.19 0.67
 8 -3 -8 154.07 4.68
 8 -3 -8 150.47 4.23
 8 -3 -8 155.56 5.04
 -8 -3 8 157.09 4.26
 8 3 -8 157.55 4.57
 8 3 -8 140.32 5.01
 8 3 -8 159.7 4.27
 7 -3 -8 1.69 0.2
 -7 -3 8 2 0.21
 7 -3 -8 2.09 0.51
 -7 3 8 1.95 0.21
 7 3 -8 1.78 0.22
 7 3 -8 2.35 0.39
 7 3 -8 1 0.52
 6 -3 -8 119.71 3.34
 -6 -3 8 115.91 3.35
 6 -3 -8 113.81 3.94
 -6 3 8 118.18 3.35
 6 3 -8 120.3 3.36
 6 3 -8 121.5 3.38
 -5 -3 8 12.14 0.52
 5 3 -8 11.34 0.53
 -5 3 8 11.23 0.51
 4 -3 -8 53.66 1.67
 -4 -3 8 56.15 1.68
 -4 3 8 53.2 1.67
 4 3 -8 52.14 1.67
 -3 -3 8 8 0.44
 3 -3 -8 7.49 0.44
 3 3 -8 8.38 0.45
 -3 3 8 8.41 0.44
 -2 -3 8 3.33 0.33
 2 -3 -8 4.35 0.38
 2 3 -8 3.38 0.35
 -2 3 8 4.1 0.37
 -1 -3 8 0.88 0.21
 1 -3 -8 0.99 0.21
 -1 3 8 0.33 0.17
 1 3 -8 1.08 0.25
 0 -3 8 42.32 1.48
 0 -3 -8 44.29 1.49
 0 3 -8 45.01 1.5
 0 3 8 43.63 1.49
 1 -3 8 2.06 0.3
 -1 -3 -8 1.71 0.3
 1 3 8 2.36 0.33
 -1 3 -8 1.61 0.28
 2 -3 8 177.02 5.14
 -2 -3 -8 172.4 5.14
 -2 3 -8 189.06 5.18
 2 3 8 182.47 5.17
 3 -3 8 0.11 0.2
 -3 -3 -8 0.3 0.22
 -3 3 -8 0.45 0.24
 3 3 8 0.02 0.22
 4 -3 8 226.07 6.32
 -4 -3 -8 216.99 6.32
 4 3 8 219.65 6.33
 -4 3 -8 226.15 6.34
 -5 -3 -8 2.33 0.38
 5 -3 8 2.11 0.37
 5 3 8 2.55 0.41
 -5 3 -8 2.51 0.4
 -6 -3 -8 160.49 4.79
 6 -3 8 157.55 4.77
 6 3 8 163.57 4.81
 -6 3 -8 165.78 4.79
 7 -3 8 1.36 0.33
 -7 3 -8 1.34 0.34
 7 3 8 1.47 0.39
 8 -3 8 117.2 3.61
 8 3 8 113.53 3.63
 9 -3 8 1.96 0.42
 9 3 8 0.99 0.39
 10 -3 8 40.92 1.67
 10 3 8 41.43 1.72
 11 -3 8 1.1 0.42
 11 3 8 0.89 0.45
 12 3 8 10.85 0.96
 19 -4 -8 0.36 0.53
 19 4 -8 0.13 0.61
 18 -4 -8 64.12 2.6
 18 4 -8 59.48 2.62
 17 -4 -8 0.88 0.58
 17 4 -8 1.1 0.57
 16 -4 -8 65.24 2.59
 16 -4 -8 65.61 3.36
 16 4 -8 71.09 3.29
 16 4 -8 63.69 2.6
 15 -4 -8 0.13 0.72
 15 -4 -8 -0.02 0.4
 15 4 -8 0.38 0.77
 15 4 -8 0.7 0.45
 14 -4 -8 22.23 1.84
 14 -4 -8 22.67 1.29
 14 4 -8 24.41 1.31
 14 4 -8 24.94 1.83
 13 -4 -8 3.29 0.89
 13 -4 -8 2.58 0.5
 13 4 -8 3.77 0.89
 13 4 -8 3.52 0.59
 12 -4 -8 11.62 0.88
 12 -4 -8 16.3 1.55
 12 4 -8 12.45 0.5
 12 4 -8 10.06 1.2
 12 4 -8 12.37 0.88
 11 -4 -8 0.31 0.36
 11 -4 -8 -0.11 0.44
 11 4 -8 -0.32 0.52
 11 4 -8 0.17 0.14
 11 4 -8 -0.06 0.29
 10 -4 -8 0.06 0.31
 10 -4 -8 0.11 0.15
 10 -4 -8 0.12 0.4
 10 4 -8 0.24 0.56
 10 4 -8 0.24 0.29
 10 4 -8 0.54 0.17
 9 -4 -8 0.27 0.16
 9 -4 -8 0.27 0.4
 9 -4 -8 0.19 0.32
 9 4 -8 1.06 0.56
 9 4 -8 1.05 0.31
 9 4 -8 0.48 0.16
 8 -4 -8 32.56 1.09
 -8 -4 8 33.2 1.09
 8 -4 -8 34.99 1.72
 8 4 -8 34.11 1.12
 8 4 -8 35.34 1.78
 8 4 -8 31.87 1.32
 -7 -4 8 5.7 0.34
 7 -4 -8 5.95 0.75
 7 -4 -8 5.21 0.34
 -7 4 8 5.06 0.35
 7 4 -8 6.62 0.87
 7 4 -8 6.2 0.57
 7 4 -8 6.8 0.4
 6 -4 -8 124.93 3.56
 6 -4 -8 125.1 4.16
 -6 -4 8 130.58 3.58
 -6 4 8 126.88 3.57
 6 4 -8 117.66 3.65
 6 4 -8 128.68 3.59
 -5 -4 8 3.88 0.33
 5 -4 -8 3.99 0.31
 -5 4 8 4.07 0.35
 5 4 -8 4.2 0.36
 5 4 -8 3.63 0.34
 -4 -4 8 246.18 6.79
 4 -4 -8 243.36 6.79
 4 4 -8 251.97 6.82
 -4 4 8 243.42 6.8
 3 -4 -8 25.29 0.93
 -3 -4 8 24.27 0.92
 -3 4 8 25.91 0.95
 3 4 -8 23.31 0.93
 -2 -4 8 341.16 9.35
 -2 4 8 345.35 9.37
 2 4 -8 337.68 9.36
 -1 -4 8 2.45 0.31
 1 4 -8 2.59 0.33
 -1 4 8 2.47 0.32
 0 -4 8 330.07 9.06
 0 4 8 328.11 9.07
 0 4 -8 327.54 9.07
 1 -4 8 2.05 0.31
 -1 4 -8 1.48 0.3
 1 4 8 2.31 0.35
 2 -4 8 199.91 5.72
 2 4 8 197.51 5.74
 -2 4 -8 205.48 5.74
 3 -4 8 0.26 0.19
 -3 4 -8 -0.2 0.18
 3 4 8 0.15 0.23
 4 -4 8 38.99 1.44
 -4 4 -8 37.55 1.43
 4 4 8 38 1.46
 5 -4 8 0.82 0.29
 5 4 8 0.48 0.29
 -5 4 -8 0.3 0.26
 -6 -4 -8 4.06 0.52
 6 -4 8 5.14 0.55
 -6 4 -8 4.84 0.55
 6 4 8 4.5 0.55
 7 -4 8 0.55 0.29
 -7 -4 -8 0.1 0.26
 -7 4 -8 0.18 0.27
 7 4 8 0.42 0.33
 8 -4 8 18.08 0.97
 -8 -4 -8 17.17 0.97
 8 4 8 18.25 1.03
 9 -4 8 0.17 0.31
 9 4 8 0.16 0.34
 10 -4 8 17.63 1.05
 10 4 8 19.61 1.13
 11 -4 8 0.46 0.36
 11 4 8 0.22 0.41
 18 -5 -8 0.29 0.55
 18 5 -8 0.8 0.61
 17 -5 -8 -0.06 0.43
 17 5 -8 0.8 0.58
 16 -5 -8 9.58 0.96
 16 -5 -8 8.86 1.43
 16 5 -8 10.02 1.03
 15 -5 -8 -0.21 0.6
 15 -5 -8 0.35 0.44
 15 5 -8 -0.48 0.62
 15 5 -8 0.5 0.46
 14 -5 -8 23.13 1.3
 14 -5 -8 24.71 1.86
 14 5 -8 20.87 1.27
 14 5 -8 24.1 1.76
 13 -5 -8 0.4 0.58
 13 -5 -8 0.29 0.37
 13 5 -8 0.25 0.17
 13 5 -8 -0.08 0.37
 13 5 -8 0.12 0.61
 12 -5 -8 82.32 3.34
 12 -5 -8 76.4 2.78
 12 5 -8 77.8 2.72
 12 5 -8 79.2 2.33
 12 5 -8 81.99 3.23
 11 -5 -8 1.82 0.7
 11 -5 -8 2.98 0.54
 11 -5 -8 2.7 0.22
 11 5 -8 3.54 0.77
 11 5 -8 3 0.31
 11 5 -8 3.02 0.5
 10 -5 -8 93.28 2.82
 10 -5 -8 94.53 3.21
 10 -5 -8 95.1 3.59
 10 5 -8 98.95 3.12
 10 5 -8 97.23 2.82
 10 5 -8 103.41 3.65
 9 -5 -8 3.91 0.38
 9 -5 -8 2.56 0.6
 9 5 -8 4.65 0.37
 9 5 -8 3.52 0.7
 9 5 -8 3.75 0.5
 -8 -5 8 165.48 4.67
 8 -5 -8 164.69 4.69
 8 -5 -8 170.01 5.36
 8 5 -8 169.87 5.39
 8 5 -8 166.5 4.69
 8 5 -8 166.05 4.88
 -7 -5 8 10.12 0.5
 7 -5 -8 11.19 0.93
 7 -5 -8 9.93 0.5
 7 5 -8 10.5 0.54
 -7 5 8 9.08 0.51
 7 5 -8 9.48 0.96
 7 5 -8 9.33 0.65
 6 -5 -8 111.21 3.68
 6 -5 -8 108.91 3.15
 -6 -5 8 109.2 3.15
 6 5 -8 112.65 3.18
 6 5 -8 103.24 3.29
 -6 5 8 106.36 3.15
 5 -5 -8 0.27 0.15
 -5 -5 8 0.14 0.14
 5 5 -8 0.28 0.22
 -5 5 8 0.17 0.18
 5 5 -8 0.38 0.2
 -4 -5 8 37.56 1.26
 4 -5 -8 34.45 1.24
 -4 5 8 37.22 1.27
 4 5 -8 36.21 1.27
 4 5 -8 36.4 1.3
 3 -5 -8 0.19 0.16
 -3 -5 8 0.25 0.15
 3 5 -8 0.26 0.2
 -3 5 8 0.27 0.18
 2 -5 -8 5.36 0.45
 -2 -5 8 4.97 0.43
 -2 5 8 4.96 0.45
 2 5 -8 5.19 0.45
 -1 -5 8 3.27 0.35
 1 -5 -8 2.28 0.32
 1 5 -8 2.65 0.34
 -1 5 8 2.39 0.33
 0 -5 8 51.82 1.74
 0 -5 -8 50.57 1.73
 0 5 -8 52.36 1.76
 0 5 8 51.8 1.76
 -1 -5 -8 10.38 0.6
 1 -5 8 10.91 0.62
 1 5 8 8.99 0.6
 -1 5 -8 9.12 0.61
 2 -5 8 108.54 3.33
 -2 -5 -8 107.92 3.33
 2 5 8 112.25 3.37
 -2 5 -8 110.34 3.34
 3 -5 8 0.49 0.24
 -3 -5 -8 0.89 0.28
 3 5 8 1.08 0.31
 -3 5 -8 0.82 0.3
 -4 -5 -8 160.54 4.54
 4 -5 8 147.32 4.48
 4 5 8 149.32 4.53
 -4 5 -8 150.72 4.5
 -5 -5 -8 0.53 0.27
 5 -5 8 0.4 0.26
 5 5 8 0.33 0.29
 -5 5 -8 0.82 0.31
 6 -5 8 121.81 3.77
 -6 -5 -8 122.5 3.79
 6 5 8 121.58 3.82
 -6 5 -8 125.47 3.79
 7 -5 8 1.55 0.39
 -7 -5 -8 2.17 0.42
 7 5 8 1.99 0.44
 -7 5 -8 1.88 0.4
 8 -5 8 88.83 2.99
 -8 -5 -8 94.06 3.05
 8 5 8 93.88 3.08
 9 -5 8 0.36 0.33
 9 5 8 0.27 0.37
 10 -5 8 46.1 1.81
 10 5 8 42.89 1.85
 11 -5 8 -0.18 0.35
 11 5 8 0.12 0.41
 18 -6 -8 52.56 2.34
 18 6 -8 50.64 2.38
 17 -6 -8 1.14 0.59
 17 6 -8 1.19 0.65
 16 -6 -8 42.26 1.94
 16 6 -8 44.34 2.04
 15 -6 -8 1.24 0.71
 15 -6 -8 0.34 0.47
 15 6 -8 0.45 0.72
 15 6 -8 1.43 0.56
 14 -6 -8 39.23 1.81
 14 -6 -8 39.89 2.32
 14 6 -8 38.42 1.61
 14 6 -8 40.88 2.2
 14 6 -8 40.89 1.82
 13 -6 -8 -0.03 0.36
 13 -6 -8 0.05 0.61
 13 6 -8 0.75 0.42
 13 6 -8 0.06 0.2
 13 6 -8 0.05 0.6
 12 -6 -8 4.67 0.63
 12 -6 -8 5.78 0.91
 12 6 -8 4.98 0.89
 12 6 -8 5.27 0.65
 12 6 -8 6.03 0.45
 11 -6 -8 0.06 0.16
 11 -6 -8 0.46 0.39
 11 -6 -8 0.16 0.48
 11 6 -8 -0.11 0.19
 11 6 -8 0.19 0.32
 11 6 -8 -0.06 0.52
 10 -6 -8 -0.05 0.47
 10 -6 -8 0.58 0.23
 10 -6 -8 0.9 0.39
 10 6 -8 0.78 0.34
 10 6 -8 0.19 0.21
 10 6 -8 0.2 0.51
 9 -6 -8 6.98 0.52
 9 -6 -8 7.07 0.88
 9 6 -8 6.99 0.48
 9 6 -8 8.26 0.98
 9 6 -8 5.98 0.6
 -8 -6 8 34.29 1.22
 8 -6 -8 33.37 1.26
 8 -6 -8 36.51 1.72
 8 6 -8 35.31 1.77
 8 6 -8 36.78 1.38
 8 6 -8 36.09 1.26
 -7 -6 8 7.3 0.46
 7 -6 -8 6.99 0.8
 7 -6 -8 7.34 0.47
 -7 6 8 7.53 0.51
 7 6 -8 6.99 0.49
 7 6 -8 7.14 0.58
 7 6 -8 8.54 0.93
 -6 -6 8 110.75 3.22
 6 -6 -8 112.57 3.71
 6 -6 -8 108.1 3.21
 6 6 -8 106.29 3.41
 6 6 -8 113.26 3.25
 -6 6 8 106.05 3.22
 -5 -6 8 31.46 1.15
 5 -6 -8 34.46 1.17
 5 -6 -8 30.58 1.48
 -5 6 8 30.78 1.16
 5 6 -8 31.61 1.18
 5 6 -8 31.15 1.29
 4 -6 -8 144.44 4.14
 -4 -6 8 141.14 4.13
 4 6 -8 143.23 4.16
 4 6 -8 143.93 4.23
 -3 -6 8 6.27 0.43
 3 -6 -8 6.15 0.45
 3 6 -8 5.09 0.46
 3 6 -8 5.97 0.51
 -3 6 8 6.38 0.49
 2 -6 -8 323.13 8.9
 -2 -6 8 318.91 8.89
 -2 6 8 324.93 8.93
 2 6 -8 320.13 8.91
 1 -6 -8 6.99 0.5
 -1 -6 8 6.3 0.48
 -1 6 8 7.34 0.59
 1 6 -8 5.73 0.51
 0 -6 -8 210.38 5.87
 0 -6 8 202 5.84
 0 6 8 209.87 5.88
 0 6 -8 198.49 5.85
 -1 -6 -8 1.38 0.29
 1 -6 8 1.79 0.31
 -1 6 -8 1.66 0.32
 1 6 8 1.75 0.34
 2 -6 8 132.1 3.95
 -2 -6 -8 133.29 3.97
 -2 6 -8 129.08 3.95
 2 6 8 134.96 4
 -3 -6 -8 3.7 0.44
 3 -6 8 3.17 0.41
 -3 6 -8 3.45 0.44
 3 6 8 3.86 0.47
 -4 -6 -8 18.18 0.93
 4 -6 8 18.19 0.92
 -4 6 -8 18.39 0.95
 4 6 8 17.1 0.95
 -5 -6 -8 2.94 0.42
 5 -6 8 3.11 0.46
 -5 6 -8 2.91 0.45
 5 6 8 2.77 0.44
 -6 -6 -8 4.57 0.55
 6 -6 8 4.53 0.54
 6 6 8 4.46 0.56
 -6 6 -8 3.98 0.51
 -7 -6 -8 1.61 0.43
 7 -6 8 1.48 0.37
 -7 6 -8 1.17 0.38
 7 6 8 1.66 0.45
 8 -6 8 9.09 0.79
 -8 -6 -8 8.61 0.8
 8 6 8 7.88 0.79
 9 -6 8 0.04 0.32
 9 6 8 0.67 0.42
 10 -6 8 24.6 1.24
 10 6 8 23.1 1.32
 11 -6 8 0.34 0.37
 11 6 8 -0.2 0.44
 18 -7 -8 0.4 0.54
 18 7 -8 -0.18 0.6
 17 -7 -8 0.37 0.52
 17 7 -8 -0.2 0.53
 16 -7 -8 7.78 0.93
 16 7 -8 11.49 1.11
 15 -7 -8 -0.23 0.44
 15 -7 -8 0.06 0.63
 15 7 -8 -0.82 0.61
 15 7 -8 0.2 0.46
 14 -7 -8 34.21 2.08
 14 -7 -8 32.34 1.59
 14 7 -8 31.76 1.19
 14 7 -8 32.76 1.89
 14 7 -8 31.01 1.59
 13 -7 -8 1.34 0.71
 13 -7 -8 1.71 0.5
 13 7 -8 1.88 0.71
 13 7 -8 0.97 0.3
 13 7 -8 1.35 0.48
 12 -7 -8 60.16 2.71
 12 -7 -8 59.43 2.35
 12 7 -8 61.85 2.59
 12 7 -8 62.16 2.26
 12 7 -8 59.56 1.97
 11 -7 -8 -0.22 0.35
 11 -7 -8 0.66 0.51
 11 -7 -8 0.34 0.22
 11 7 -8 -0.02 0.5
 11 7 -8 0.19 0.25
 11 7 -8 0.43 0.35
 10 -7 -8 123.97 3.6
 10 -7 -8 122.84 4.24
 10 7 -8 122.9 4.15
 10 7 -8 116.75 3.73
 10 7 -8 119.19 3.58
 9 -7 -8 4.33 0.47
 9 -7 -8 4.4 0.72
 9 7 -8 3.82 0.7
 9 7 -8 2.81 0.44
 9 7 -8 3.88 0.44
 8 -7 -8 78.9 2.88
 -8 -7 8 73.44 2.35
 8 -7 -8 75.87 2.43
 8 7 -8 74.63 2.39
 8 7 -8 74.69 2.44
 8 7 -8 79.61 2.87
 7 -7 -8 5.89 0.76
 7 -7 -8 4.63 0.46
 -7 -7 8 5.97 0.45
 7 7 -8 5.22 0.49
 7 7 -8 5.02 0.49
 7 7 -8 5.71 0.77
 -6 -7 8 74.27 2.37
 6 -7 -8 76.9 2.39
 6 -7 -8 75.78 2.74
 6 7 -8 82.14 2.89
 -6 7 8 72.48 2.39
 6 7 -8 75.73 2.41
 6 7 -8 76.09 2.62
 5 -7 -8 1.22 0.26
 -5 -7 8 1.28 0.26
 5 -7 -8 1.09 0.41
 5 7 -8 1.37 0.31
 -5 7 8 1.04 0.28
 5 7 -8 0.83 0.36
 4 -7 -8 14.64 0.72
 -4 -7 8 13.37 0.7
 4 7 -8 14.27 0.83
 4 7 -8 13.77 0.75
 -4 7 8 14.41 0.76
 3 -7 -8 0.6 0.22
 -3 -7 8 0.53 0.24
 3 7 -8 0.59 0.28
 -3 7 8 1.17 0.29
 3 7 -8 0.86 0.3
 -2 -7 8 0.58 0.22
 2 -7 -8 1.38 0.3
 2 7 -8 0.45 0.25
 -2 7 8 1.48 0.33
 2 7 -8 1.09 0.32
 -1 -7 8 8.52 0.58
 1 -7 -8 7.98 0.58
 -1 7 8 7.61 0.61
 1 7 -8 8.41 0.63
 0 -7 -8 20.75 0.96
 0 -7 8 22.37 0.98
 0 7 -8 21.46 1.01
 0 7 8 21.13 1
 -1 -7 -8 1.6 0.34
 1 -7 8 2 0.36
 1 7 8 1.55 0.39
 -1 7 -8 1.71 0.38
 2 -7 8 81.38 2.69
 -2 -7 -8 85.22 2.72
 -2 7 -8 85.14 2.73
 2 7 8 82.65 2.74
 -3 -7 -8 10.75 0.72
 3 -7 8 10.22 0.69
 3 7 8 10.99 0.77
 -3 7 -8 10.31 0.73
 -4 -7 -8 107.45 3.25
 4 -7 8 97.26 3.18
 4 7 8 100.95 3.25
 -4 7 -8 97.19 3.18
 -5 -7 -8 0.42 0.3
 5 -7 8 0.46 0.28
 5 7 8 0.86 0.37
 -5 7 -8 0.52 0.33
 6 -7 8 85.67 2.82
 -6 -7 -8 85.15 2.85
 6 7 8 81.36 2.86
 -6 7 -8 87.06 2.84
 7 -7 8 0.06 0.28
 -7 -7 -8 0.83 0.36
 -7 7 -8 0.21 0.36
 7 7 8 0.58 0.39
 8 -7 8 61.51 2.23
 -8 -7 -8 61.13 2.28
 8 7 8 60.98 2.32
 9 -7 8 0.3 0.35
 9 7 8 0.47 0.47
 10 -7 8 27.66 1.38
 10 7 8 27.93 1.48
 17 -8 -8 1.48 0.62
 17 8 -8 1.24 0.66
 16 -8 -8 28.25 1.61
 16 8 -8 28.72 1.66
 15 -8 -8 0.3 0.47
 15 -8 -8 -0.39 0.67
 15 8 -8 0.23 0.49
 14 -8 -8 25.74 1.48
 14 -8 -8 26.11 1.8
 14 8 -8 28.53 1.73
 14 8 -8 24.85 1.4
 14 8 -8 27.25 1.14
 13 -8 -8 1.29 0.53
 13 -8 -8 1.85 0.74
 13 8 -8 1.6 0.38
 13 8 -8 1.78 0.65
 13 8 -8 2.33 0.53
 12 -8 -8 5.58 0.74
 12 -8 -8 6.9 0.48
 12 -8 -8 9.09 1.13
 12 8 -8 6.4 0.6
 12 8 -8 7.14 0.93
 12 8 -8 6.43 0.7
 11 -8 -8 1.24 0.31
 11 -8 -8 0.78 0.53
 11 8 -8 1.28 0.56
 11 8 -8 0.94 0.38
 11 8 -8 1.93 0.39
 10 -8 -8 0.32 0.43
 10 -8 -8 -0.15 0.24
 10 8 -8 0.03 0.43
 10 8 -8 -0.13 0.29
 10 8 -8 -0.3 0.24
 9 -8 -8 0.94 0.29
 9 -8 -8 0.29 0.4
 9 8 -8 0.65 0.48
 9 8 -8 0.59 0.31
 9 8 -8 1.27 0.35
 8 -8 -8 18.41 1.19
 8 -8 -8 17.59 0.91
 -8 -8 8 17.12 0.85
 8 8 -8 16.94 1.09
 8 8 -8 19.03 1.2
 8 8 -8 19.21 0.92
 -7 -8 8 13.51 0.73
 7 -8 -8 14.01 0.99
 7 -8 -8 13.21 0.76
 7 8 -8 14.76 1.07
 7 8 -8 14.01 0.8
 6 -8 -8 76.85 2.78
 -6 -8 8 79.11 2.51
 6 -8 -8 78.2 2.53
 6 8 -8 76 2.54
 -6 8 8 74.51 2.53
 6 8 -8 86.41 2.94
 6 8 -8 82.68 2.8
 -5 -8 8 18.46 0.87
 5 -8 -8 19.24 1.09
 5 -8 -8 17.64 0.87
 5 8 -8 18.66 1.07
 5 8 -8 19.45 0.93
 -5 8 8 16.9 0.89
 -4 -8 8 125.88 3.89
 4 -8 -8 128.6 4.15
 4 -8 -8 134.85 3.93
 -4 8 8 129.31 3.94
 4 8 -8 131.89 4.11
 4 8 -8 134.77 3.95
 3 -8 -8 11.71 0.71
 -3 -8 8 14.11 0.75
 -3 8 8 14.51 0.8
 3 8 -8 13.81 0.78
 3 8 -8 13.69 0.87
 2 -8 -8 130.31 3.96
 -2 -8 8 134.12 3.96
 2 8 -8 127.79 4.06
 -2 8 8 131.75 3.99
 2 8 -8 134.26 3.99
 -1 -8 8 2.58 0.39
 1 -8 -8 2.65 0.41
 1 8 -8 2.28 0.4
 1 8 -8 2.73 0.45
 -1 8 8 2.18 0.42
 0 -8 8 120.53 3.72
 0 -8 -8 124.84 3.76
 0 8 -8 124 3.87
 0 8 8 120.98 3.77
 0 8 -8 121.09 3.75
 -1 -8 -8 0.58 0.27
 1 -8 8 0.13 0.24
 -1 8 -8 -0.28 0.28
 1 8 8 0.06 0.31
 -2 -8 -8 72.57 2.46
 2 -8 8 71.81 2.45
 2 8 8 77.37 2.52
 -2 8 -8 70.07 2.45
 -3 -8 -8 0.23 0.25
 3 -8 8 0.12 0.23
 3 8 8 0.24 0.31
 -3 8 -8 0.23 0.29
 4 -8 8 36.41 1.48
 -4 -8 -8 35.6 1.48
 4 8 8 31.94 1.47
 -4 8 -8 35.91 1.49
 5 -8 8 1.22 0.37
 -5 -8 -8 1.38 0.38
 5 8 8 1.55 0.41
 -5 8 -8 0.94 0.39
 6 -8 8 0.68 0.32
 -6 -8 -8 1.74 0.45
 -6 8 -8 1 0.4
 6 8 8 0.82 0.45
 7 -8 8 1.55 0.42
 -7 -8 -8 1.07 0.43
 7 8 8 1.02 0.46
 8 -8 8 4.28 0.58
 -8 -8 -8 4.13 0.61
 8 8 8 5.22 0.72
 9 -8 8 0.32 0.36
 9 8 8 -0.19 0.44
 10 -8 8 9.73 0.92
 10 8 8 8.49 0.97
 17 -9 -8 0.23 0.54
 16 -9 -8 3.1 0.76
 16 9 -8 5.57 1.38
 15 -9 -8 2.77 0.7
 15 9 -8 2.47 0.46
 14 -9 -8 26.07 1.78
 14 -9 -8 24.98 1.48
 14 9 -8 24.68 1.16
 13 -9 -8 0.76 0.58
 13 9 -8 0.43 0.35
 12 -9 -8 48.12 2.28
 12 -9 -8 44.42 1.6
 12 9 -8 47.27 1.76
 11 -9 -8 6.13 0.87
 11 -9 -8 6.13 0.58
 11 9 -8 5.65 0.63
 10 -9 -8 72.43 2.32
 10 -9 -8 64.78 2.68
 10 9 -8 67.24 2.57
 10 9 -8 64.5 2.3
 9 -9 -8 2.69 0.6
 9 -9 -8 2.02 0.39
 9 9 -8 2.32 0.45
 9 9 -8 2.77 0.57
 8 -9 -8 59.15 2.34
 -8 -9 8 59.9 2.11
 8 -9 -8 56.39 2.06
 8 9 -8 61.7 2.3
 8 9 -8 57.54 2.08
 7 -9 -8 12.84 0.96
 7 -9 -8 12.42 0.79
 -7 -9 8 11.88 0.73
 7 9 -8 12.61 0.96
 7 9 -8 11.22 0.79
 6 -9 -8 42.95 1.67
 6 -9 -8 42.84 1.81
 -6 -9 8 45.86 1.66
 6 9 -8 48.9 1.93
 6 9 -8 44.48 1.7
 -6 9 8 42.99 1.7
 5 -9 -8 0.59 0.32
 5 -9 -8 0.03 0.23
 -5 -9 8 0.57 0.26
 5 9 -8 0.94 0.35
 5 9 -8 -0.02 0.38
 -5 9 8 0.48 0.31
 4 -9 -8 11.59 0.74
 4 -9 -8 12.78 0.87
 -4 -9 8 12.34 0.75
 4 9 -8 11.95 0.81
 4 9 -8 12.27 0.92
 -4 9 8 10.88 0.78
 3 -9 -8 0.95 0.31
 -3 -9 8 0.6 0.29
 3 9 -8 0.4 0.34
 3 9 -8 0.73 0.4
 -3 9 8 0.44 0.3
 2 -9 -8 0.17 0.25
 -2 -9 8 0.19 0.23
 -2 9 8 -0.1 0.3
 2 9 -8 0 0.31
 2 9 -8 -0.05 0.27
 1 -9 -8 3.39 0.46
 -1 -9 8 2.82 0.46
 -1 9 8 3.46 0.52
 1 9 -8 3.35 0.55
 1 9 -8 2.71 0.48
 0 -9 8 12.53 0.76
 0 -9 -8 12.69 0.81
 0 9 -8 10.73 0.78
 0 9 -8 12.41 0.89
 0 9 8 11.13 0.85
 1 -9 8 7.6 0.67
 -1 -9 -8 7.98 0.73
 -1 9 -8 7.54 0.76
 1 9 8 7.33 0.74
 -1 9 -8 6.71 0.66
 -2 -9 -8 24.54 1.18
 2 -9 8 25.45 1.2
 -2 9 -8 25.58 1.33
 -2 9 -8 25.47 1.22
 2 9 8 24.97 1.24
 -3 -9 -8 1.15 0.37
 3 -9 8 1.13 0.35
 -3 9 -8 1.26 0.38
 3 9 8 1.41 0.41
 -4 -9 -8 72.63 2.54
 4 -9 8 68.78 2.48
 4 9 8 73.43 2.59
 -4 9 -8 70.7 2.52
 -5 -9 -8 1.65 0.45
 5 -9 8 2.26 0.47
 5 9 8 1.84 0.52
 -5 9 -8 1.89 0.5
 -6 -9 -8 44.28 1.86
 6 -9 8 46.82 1.85
 -6 9 -8 46.42 1.87
 6 9 8 47.06 1.93
 7 -9 8 0.75 0.39
 -7 -9 -8 0.79 0.42
 7 9 8 -0.13 0.41
 8 -9 8 35.66 1.59
 -8 -9 -8 34.47 1.64
 8 9 8 32.37 1.67
 9 -9 8 0.88 0.42
 9 9 8 0.85 0.57
 16 -10 -8 23.01 1.52
 15 -10 -8 2.68 0.69
 15 10 -8 2.42 0.51
 14 10 -8 23.56 1.19
 13 -10 -8 -0.31 0.49
 13 10 -8 -0.12 0.38
 12 -10 -8 6.08 0.89
 12 -10 -8 6.08 0.57
 12 10 -8 6.02 0.7
 11 -10 -8 1.16 0.55
 11 -10 -8 1.17 0.38
 11 10 -8 1.14 0.45
 10 -10 -8 1.03 0.49
 10 -10 -8 2.04 0.43
 10 10 -8 2.32 0.52
 9 -10 -8 3.6 0.5
 9 -10 -8 3.54 0.66
 9 10 -8 3.06 0.54
 8 -10 -8 9.07 0.71
 8 -10 -8 9.33 0.93
 8 10 -8 7.61 0.76
 7 -10 -8 6.42 0.75
 -7 -10 8 7.34 0.68
 7 -10 -8 6.23 0.67
 7 10 -8 6.97 0.73
 -6 -10 8 43.38 1.67
 6 -10 -8 41.17 1.76
 6 -10 -8 43.33 1.7
 6 10 -8 42.8 1.73
 5 -10 -8 11.77 0.8
 5 -10 -8 11.78 0.85
 -5 -10 8 12.73 0.81
 5 10 -8 13.91 1.07
 5 10 -8 12.1 0.88
 -5 10 8 12.47 0.86
 4 -10 -8 69.05 2.36
 4 -10 -8 67.21 2.41
 -4 -10 8 67.09 2.35
 4 10 -8 67.5 2.39
 -4 10 8 68.31 2.4
 4 10 -8 66.5 2.58
 -3 -10 8 9.66 0.7
 3 -10 -8 9.64 0.72
 3 -10 -8 8.97 0.74
 3 10 -8 8.93 0.88
 -3 10 8 10.26 0.85
 3 10 -8 9.58 0.76
 2 -10 -8 83.98 2.72
 -2 -10 8 78.78 2.67
 -2 10 8 79.95 2.74
 2 10 -8 78.13 2.71
 2 10 -8 76.1 2.84
 -1 -10 8 4.44 0.57
 1 -10 -8 2.86 0.47
 1 10 -8 3.66 0.59
 -1 10 8 4.42 0.61
 1 10 -8 3.56 0.59
 0 -10 -8 42.53 1.75
 0 -10 8 44.8 1.75
 0 10 -8 43.89 1.78
 0 10 8 47.65 1.86
 0 10 -8 44.55 1.9
 1 -10 8 -0.02 0.29
 -1 -10 -8 0.44 0.34
 -1 10 -8 0.6 0.39
 -1 10 -8 0.49 0.39
 1 10 8 0.78 0.44
 2 -10 8 28.01 1.32
 -2 -10 -8 29.16 1.37
 2 10 8 28.15 1.42
 -2 10 -8 28.14 1.45
 -2 10 -8 27.85 1.38
 3 -10 8 2.21 0.48
 -3 -10 -8 2.07 0.48
 -3 10 -8 1.36 0.51
 -3 10 -8 2.77 0.55
 3 10 8 2.76 0.59
 -4 -10 -8 4.45 0.62
 4 -10 8 6.52 0.71
 4 10 8 5.02 0.69
 -4 10 -8 5.7 0.7
 -4 10 -8 7.16 0.87
 5 -10 8 0.55 0.34
 -5 -10 -8 1.29 0.41
 5 10 8 1.64 0.51
 -5 10 -8 0.44 0.43
 -5 10 -8 0.76 0.51
 -6 -10 -8 1.59 0.48
 6 -10 8 3 0.56
 -6 10 -8 1.17 0.49
 6 10 8 0.81 0.49
 -7 -10 -8 0.65 0.44
 7 -10 8 0.49 0.39
 7 10 8 0.37 0.48
 -8 -10 -8 2.82 1.03
 8 -10 8 3.13 0.62
 8 10 8 2.74 0.71
 9 -10 8 1.57 0.49
 9 10 8 2.28 0.66
 15 11 -8 -0.15 0.42
 14 11 -8 16.57 1.07
 13 -11 -8 1.48 0.64
 13 11 -8 0.22 0.46
 12 -11 -8 22.77 1.15
 12 -11 -8 27.44 1.64
 12 11 -8 27.41 1.37
 11 -11 -8 1.38 0.56
 11 -11 -8 0.81 0.36
 11 11 -8 1.96 0.54
 10 -11 -8 37.79 1.87
 10 -11 -8 42.77 1.67
 10 11 -8 37.01 1.71
 9 -11 -8 3.51 0.52
 9 -11 -8 3.52 0.62
 9 11 -8 2.82 0.58
 8 -11 -8 21.78 1.13
 8 -11 -8 22.76 1.28
 8 11 -8 20.01 1.2
 7 -11 -8 -0.18 0.29
 -7 -11 8 -0.1 0.27
 7 -11 -8 0.05 0.29
 7 11 -8 0.16 0.38
 6 -11 -8 23.08 1.21
 6 -11 -8 26.12 1.25
 -6 -11 8 21.77 1.14
 6 11 -8 23.19 1.26
 5 -11 -8 -0.3 0.4
 5 -11 -8 -0.05 0.27
 -5 -11 8 -0.02 0.26
 5 11 -8 -0.16 0.36
 -5 11 8 0.5 0.4
 5 11 -8 0.26 0.45
 -4 -11 8 3.53 0.57
 4 -11 -8 3.62 0.54
 4 11 -8 2.77 0.66
 -4 11 8 3.88 0.6
 4 11 -8 4.67 0.67
 3 -11 -8 -0.03 0.24
 -3 -11 8 -0.04 0.26
 -3 11 8 0.05 0.34
 3 11 -8 0.09 0.34
 3 11 -8 0.33 0.46
 2 -11 -8 -0.26 0.24
 -2 -11 8 0.07 0.28
 2 11 -8 0 0.43
 -2 11 8 -0.07 0.33
 2 11 -8 0.08 0.36
 1 -11 -8 7.64 0.78
 -1 -11 8 7.43 0.72
 -1 11 8 8.46 0.84
 1 11 -8 5.59 0.69
 1 11 -8 7.69 0.9
 0 -11 8 10.84 0.9
 0 -11 -8 7.58 0.75
 0 11 -8 8.89 0.93
 0 11 8 7.48 0.79
 0 11 -8 8.5 0.87
 1 -11 8 1.25 0.39
 -1 -11 -8 1.42 0.44
 1 11 8 1.86 0.54
 -1 11 -8 2.05 0.58
 -1 11 -8 0.89 0.43
 2 -11 8 13.52 0.96
 -2 -11 -8 14.2 0.97
 2 11 8 16.29 1.08
 -2 11 -8 16.41 1.06
 -2 11 -8 13.91 1.13
 -3 -11 -8 2.63 0.51
 3 -11 8 3.09 0.56
 3 11 8 2.65 0.58
 -3 11 -8 2.29 0.62
 -3 11 -8 3.22 0.6
 4 -11 8 22.62 1.26
 -4 -11 -8 23.7 1.3
 -4 11 -8 20.52 1.39
 -4 11 -8 24.09 1.33
 4 11 8 21.6 1.36
 5 -11 8 0.82 0.39
 -5 -11 -8 1.15 0.42
 -5 11 -8 0.54 0.47
 5 11 8 0.83 0.51
 -5 11 -8 1.19 0.61
 -6 -11 -8 30.27 1.53
 6 -11 8 31.2 1.53
 -6 11 -8 28.47 1.65
 6 11 8 30.34 1.6
 7 -11 8 0.63 0.43
 -7 -11 -8 1.6 0.54
 7 11 8 0.42 0.56
 -7 11 -8 0.42 0.58
 8 -11 8 19.17 1.23
 -8 11 -8 20.34 1.49
 8 11 8 17.75 1.36
 14 12 -8 6.68 0.82
 13 12 -8 0.28 0.48
 12 -12 -8 2.45 0.48
 12 12 -8 3.25 0.66
 11 -12 -8 0.58 0.38
 11 12 -8 1.28 0.57
 10 -12 -8 0.3 0.36
 10 12 -8 -0.25 0.41
 9 -12 -8 4.43 0.61
 9 12 -8 3.95 0.68
 8 -12 -8 10.27 0.87
 8 12 -8 10.18 0.95
 -7 -12 8 4.14 0.62
 7 -12 -8 3.73 0.57
 7 12 -8 1.86 0.57
 -6 -12 8 17.85 1.06
 6 -12 -8 15.56 1.01
 6 12 -8 14.01 1.08
 5 -12 -8 9.26 0.87
 -5 -12 8 7.09 0.74
 -5 12 8 8.76 1.07
 5 12 -8 5.89 0.78
 4 -12 -8 38.15 1.69
 -4 -12 8 41.75 1.72
 4 12 -8 36.24 1.71
 4 12 -8 38.8 1.95
 -4 12 8 36.54 1.73
 3 -12 -8 5.85 0.71
 -3 -12 8 8.3 0.83
 -3 12 8 6.63 0.78
 3 12 -8 6.89 0.84
 3 12 -8 8.02 1.01
 -2 -12 8 29.61 1.46
 2 -12 -8 30.83 1.46
 2 12 -8 30.66 1.68
 -2 12 8 31.12 1.54
 2 12 -8 32.29 1.59
 -1 -12 8 6.3 0.76
 1 -12 -8 7.09 0.78
 -1 12 8 5.95 0.79
 1 12 -8 6.14 0.8
 1 12 -8 4.97 0.79
 0 -12 8 24.06 1.31
 0 -12 -8 22.87 1.27
 0 12 -8 27.36 1.45
 0 12 -8 24.92 1.5
 0 12 8 24.45 1.37
 1 -12 8 0.61 0.39
 -1 -12 -8 0.69 0.4
 1 12 8 0.96 0.52
 -1 12 -8 1.81 0.62
 -1 12 -8 1.15 0.49
 2 -12 8 15.47 1.08
 -2 -12 -8 18.35 1.11
 2 12 8 13.5 1.19
 -2 12 -8 15.95 1.27
 -2 12 -8 17.81 1.21
 3 -12 8 0.31 0.42
 -3 -12 -8 0.29 0.38
 -3 12 -8 -0.87 0.44
 3 12 8 0.07 0.47
 -3 12 -8 0.52 0.5
 -4 -12 -8 4.76 0.7
 4 -12 8 5.12 0.74
 4 12 8 5.58 0.83
 -4 12 -8 4.28 0.83
 -4 12 -8 5.32 0.8
 5 -12 8 0.18 0.42
 -5 -12 -8 -0.16 0.41
 -5 12 -8 0.35 0.46
 5 12 8 0.17 0.55
 -5 12 -8 0.35 0.58
 -6 -12 -8 -0.15 0.44
 6 -12 8 -0.05 0.39
 6 12 8 0.18 0.59
 -6 12 -8 -0.21 0.48
 7 -12 8 1.89 0.57
 -7 -12 -8 1.49 0.53
 7 12 8 1.56 0.65
 -7 12 -8 2.59 0.79
 14 13 -8 6.88 0.89
 13 13 -8 -0.29 0.5
 12 -13 -8 11.17 0.87
 12 13 -8 7.15 0.92
 11 -13 -8 2.48 0.5
 11 13 -8 2.38 0.65
 10 -13 -8 20.88 1.18
 10 13 -8 18.59 1.3
 9 -13 -8 0.94 0.43
 9 13 -8 0.18 0.5
 8 -13 -8 20.39 1.17
 8 13 -8 17.78 1.27
 7 -13 -8 2.39 0.51
 -7 -13 8 1.57 0.48
 7 13 -8 0.85 0.52
 6 -13 -8 6.6 0.77
 -6 -13 8 9.36 0.92
 6 13 -8 8.49 0.95
 -5 -13 8 0.87 0.42
 5 -13 -8 -0.08 0.35
 5 13 -8 0.43 0.5
 -4 -13 8 0.28 0.38
 4 -13 -8 -0.02 0.37
 4 13 -8 0.23 0.52
 -4 13 8 0.22 0.49
 4 13 -8 0.08 0.52
 -3 -13 8 0.06 0.39
 3 -13 -8 0.22 0.37
 3 13 -8 0.26 0.5
 3 13 -8 0.91 0.62
 -3 13 8 0.21 0.49
 -2 -13 8 0.11 0.37
 2 -13 -8 0.16 0.39
 2 13 -8 -0.21 0.48
 2 13 -8 -0.17 0.52
 -2 13 8 -0.09 0.49
 -1 -13 8 0.28 0.41
 1 -13 -8 -0.25 0.38
 -1 13 8 1.71 0.62
 1 13 -8 0.23 0.59
 1 13 -8 1.14 0.53
 0 -13 8 4.12 0.67
 0 -13 -8 2.91 0.62
 0 13 -8 2.4 0.71
 0 13 8 2.49 0.67
 0 13 -8 2.02 0.62
 1 -13 8 3.18 0.65
 -1 -13 -8 2.94 0.64
 -1 13 -8 3.11 0.72
 -1 13 -8 2.26 0.7
 1 13 8 1.49 0.65
 2 -13 8 5.26 0.71
 -2 -13 -8 4.67 0.74
 -2 13 -8 6.1 0.96
 -2 13 -8 4.36 0.74
 2 13 8 3.13 0.74
 3 -13 8 1.53 0.56
 -3 -13 -8 2.16 0.61
 3 13 8 0.32 0.59
 -3 13 -8 0.63 0.56
 -3 13 -8 0.81 0.59
 4 -13 8 7.5 0.92
 -4 -13 -8 7.27 0.93
 -4 13 -8 8.03 0.99
 4 13 8 6.09 0.95
 -4 13 -8 9.28 1.16
 5 -13 8 1.56 0.57
 -5 -13 -8 1.03 0.54
 -5 13 -8 2.84 0.8
 -5 13 -8 1.3 0.61
 5 13 8 2.07 0.75
 -6 -13 -8 7.51 0.91
 6 -13 8 7.65 0.93
 -6 13 -8 9.66 1.21
 6 13 8 8.76 1.08
 12 -14 -8 2.69 0.55
 12 14 -8 1.89 0.71
 11 -14 -8 1.64 0.48
 11 14 -8 0.87 0.62
 10 -14 -8 0.23 0.39
 10 14 -8 -0.36 0.53
 9 -14 -8 0.98 0.45
 9 14 -8 0.2 0.57
 8 -14 -8 3.05 0.57
 8 14 -8 1.42 0.64
 -7 -14 8 4.66 0.7
 7 -14 -8 4.1 0.64
 7 14 -8 2.87 0.69
 -6 -14 8 6.73 0.84
 6 -14 -8 7.09 0.79
 6 14 -8 6.41 0.91
 5 -14 -8 0.74 0.44
 -5 -14 8 0.41 0.42
 5 14 -8 1.11 0.54
 -4 -14 8 6.33 0.79
 4 -14 -8 6.68 0.83
 -4 14 8 8.63 1
 4 14 -8 6.46 0.91
 -3 -14 8 3.35 0.63
 3 -14 -8 5.01 0.76
 3 14 -8 4.03 0.85
 -3 14 8 4.3 0.84
 3 14 -8 3.06 0.68
 -2 -14 8 7.79 0.9
 2 -14 -8 7.57 0.88
 -2 14 8 7.73 0.94
 2 14 -8 9.22 1.13
 2 14 -8 10.12 1.11
 1 -14 -8 0.53 0.47
 -1 -14 8 1.22 0.51
 1 14 -8 1.01 0.65
 1 14 -8 1.19 0.63
 0 -14 -8 8.53 0.94
 0 -14 8 6.07 0.83
 0 14 8 6.76 0.98
 0 14 -8 8.87 1.02
 0 14 -8 8.62 1.16
 -1 -14 -8 0.73 0.47
 1 -14 8 1.34 0.57
 -1 14 -8 0.98 0.64
 1 14 8 0.83 0.58
 -1 14 -8 2.4 0.79
 -2 -14 -8 5.32 0.83
 2 -14 8 4.3 0.76
 2 14 8 4.93 0.93
 -2 14 -8 3.75 0.88
 -2 14 -8 3.78 0.78
 3 -14 8 -0.11 0.44
 -3 -14 -8 -0.12 0.42
 3 14 8 -0.23 0.54
 -3 14 -8 -0.21 0.53
 -3 14 -8 -0.06 0.59
 -4 -14 -8 0.2 0.47
 4 -14 8 0.52 0.47
 -4 14 -8 0.94 0.65
 4 14 8 0.45 0.61
 -4 14 -8 -0.38 0.51
 5 -14 8 -0.16 0.46
 -5 -14 -8 0.17 0.53
 -5 14 -8 -0.55 0.56
 5 14 8 -0.1 0.66
 11 -15 -8 0.55 0.46
 11 15 -8 0.17 0.64
 10 -15 -8 8.69 0.88
 10 15 -8 4.85 0.89
 9 -15 -8 1.37 0.51
 9 15 -8 0.23 0.61
 8 -15 -8 4.91 0.69
 8 15 -8 4.65 0.91
 7 -15 -8 0.31 0.4
 7 15 -8 -0.26 0.56
 6 -15 -8 2.23 0.54
 -6 -15 8 1.77 0.53
 6 15 -8 1.52 0.68
 -5 -15 8 0.5 0.45
 5 -15 -8 0.05 0.39
 5 15 -8 0.81 0.59
 4 -15 -8 0.98 0.53
 -4 -15 8 0.06 0.39
 4 15 -8 -0.16 0.57
 3 -15 -8 0.41 0.48
 -3 -15 8 0.13 0.4
 3 15 -8 -0.11 0.52
 -3 15 8 1.1 0.65
 3 15 -8 0.67 0.65
 2 -15 -8 -0.05 0.44
 -2 -15 8 0.2 0.45
 2 15 -8 -0.66 0.57
 -2 15 8 -0.14 0.52
 2 15 -8 0.2 0.62
 -1 -15 8 -0.34 0.36
 1 -15 -8 -0.16 0.44
 1 15 -8 0.06 0.67
 1 15 -8 0.12 0.6
 -1 15 8 0.33 0.57
 0 -15 8 1.53 0.62
 0 -15 -8 1.98 0.65
 0 15 -8 0.5 0.69
 0 15 -8 1.18 0.7
 0 15 8 1.49 0.75
 1 -15 8 0.84 0.54
 -1 -15 -8 1.53 0.61
 -1 15 -8 0.72 0.67
 -1 15 -8 0.71 0.72
 1 15 8 0.38 0.68
 -2 -15 -8 1.99 0.71
 2 -15 8 1.31 0.55
 -2 15 -8 1.19 0.68
 2 15 8 1.09 0.75
 -2 15 -8 1.15 0.79
 3 -15 8 1.49 0.62
 -3 -15 -8 3.44 0.76
 3 15 8 2.82 0.9
 -3 15 -8 2.02 0.76
 -3 15 -8 3.98 0.92
 4 -15 8 2.87 0.73
 -4 -15 -8 2.57 0.74
 -4 15 -8 2.54 0.9
 -4 15 -8 2.1 0.72
 4 15 8 2.31 0.86
 9 -16 -8 0.82 0.52
 9 16 -8 -0.13 0.62
 8 -16 -8 0.12 0.43
 8 16 -8 1.3 0.72
 7 -16 -8 0.83 0.47
 7 16 -8 1.08 0.67
 -6 -16 8 1.97 0.59
 6 -16 -8 2.15 0.58
 6 16 -8 0.59 0.65
 5 -16 -8 1.61 0.56
 -5 -16 8 2.04 0.63
 5 16 -8 2.46 0.78
 4 -16 -8 1.57 0.56
 -4 -16 8 2.3 0.66
 4 16 -8 1.76 0.75
 -3 -16 8 0.64 0.51
 3 -16 -8 1.79 0.59
 -3 16 8 0.77 0.73
 3 16 -8 1.56 0.66
 -2 -16 8 1.75 0.62
 2 -16 -8 1.78 0.64
 -2 16 8 1.87 0.75
 2 16 -8 2.97 0.87
 2 16 -8 2.28 0.79
 1 -16 -8 0.5 0.55
 -1 -16 8 1.14 0.59
 1 16 -8 1.02 0.68
 -1 16 8 1.64 0.76
 1 16 -8 0.65 0.69
 0 -16 -8 1.85 0.68
 0 -16 8 0.72 0.59
 0 16 -8 1.97 0.87
 0 16 -8 1.33 0.72
 0 16 8 0.5 0.76
 1 -16 8 0.39 0.56
 -1 -16 -8 0.67 0.59
 -1 16 -8 1.97 0.87
 1 16 8 0.38 0.74
 -1 16 -8 0.37 0.71
 -2 -16 -8 -0.29 0.56
 2 -16 8 -0.1 0.51
 2 16 8 0.71 0.79
 -2 16 -8 1.06 0.78
 -2 16 -8 0.38 0.69
 6 -17 -8 0.77 0.5
 -6 -17 8 0.16 0.47
 6 17 -8 0.36 0.68
 5 -17 -8 -0.05 0.47
 -5 -17 8 0.35 0.5
 5 17 -8 -0.59 0.61
 -4 -17 8 0.07 0.49
 4 -17 -8 -0.42 0.45
 4 17 -8 0.58 0.7
 3 -17 -8 -0.37 0.45
 -3 -17 8 -0.33 0.47
 3 17 -8 0.29 0.7
 -2 -17 8 -0.17 0.5
 2 -17 -8 0.15 0.54
 2 17 -8 -0.02 0.7
 -2 17 8 0.12 0.66
 -1 -17 8 0.17 0.48
 1 -17 -8 0.5 0.57
 1 17 -8 -0.29 0.69
 1 17 -8 0.54 0.7
 -1 17 8 -0.85 0.66
 19 0 -9 0.17 0.61
 18 0 -9 0.63 0.6
 18 0 -9 0.58 0.94
 17 0 -9 0.3 0.93
 17 0 -9 0.88 0.51
 16 0 -9 0.39 0.9
 16 0 -9 -0.64 0.43
 15 0 -9 0.87 0.87
 15 0 -9 0.27 0.39
 14 0 -9 0.41 0.36
 14 0 -9 0.27 0.73
 13 0 -9 -0.34 0.31
 13 0 -9 0.06 0.69
 12 0 -9 -0.21 0.52
 12 0 -9 -0.27 0.26
 11 0 -9 -0.2 0.29
 11 0 -9 -0.35 0.54
 10 0 -9 -0.01 0.08
 10 0 -9 0.41 0.55
 10 0 -9 0.23 0.31
 9 0 -9 0.39 0.43
 9 0 -9 0.08 0.09
 9 0 -9 0.04 0.3
 8 0 -9 0.44 0.32
 8 0 -9 0.13 0.39
 8 0 -9 -0.04 0.1
 7 0 -9 0.09 0.12
 7 0 -9 0.05 0.36
 -7 0 9 -0.02 0.09
 6 0 -9 -0.04 0.11
 -6 0 9 -0.05 0.09
 5 0 -9 2.2 0.25
 -5 0 9 2.11 0.23
 -4 0 9 0.05 0.11
 4 0 -9 0.06 0.13
 3 0 -9 0.18 0.14
 -3 0 9 0.31 0.15
 -2 0 9 0.1 0.14
 2 0 -9 -0.03 0.13
 1 0 -9 5.88 0.43
 -1 0 9 6.99 0.45
 0 0 9 0.18 0.18
 0 0 -9 0.21 0.19
 1 0 9 4.36 0.43
 -1 0 -9 4.71 0.45
 -2 0 -9 -0.06 0.16
 2 0 9 0 0.17
 -3 0 -9 6 0.55
 3 0 9 7.08 0.55
 -4 0 -9 0.02 0.22
 4 0 9 0.37 0.25
 5 0 9 3.01 0.43
 -5 0 -9 1.87 0.35
 6 0 9 -0.19 0.24
 -6 0 -9 -0.24 0.22
 -7 0 -9 0.34 0.28
 7 0 9 0.72 0.34
 8 0 9 0 0.32
 9 0 9 -0.01 0.32
 10 0 9 -0.7 0.31
 11 0 9 2.98 0.58
 19 -1 -9 -0.24 0.54
 19 1 -9 0.34 0.64
 18 -1 -9 0.22 0.57
 18 -1 -9 0.44 0.96
 18 1 -9 -0.61 0.54
 17 -1 -9 0.63 0.95
 17 -1 -9 -0.4 0.47
 17 1 -9 1.22 1
 17 1 -9 0.64 0.55
 16 -1 -9 -1.12 0.75
 16 -1 -9 -0.42 0.43
 16 1 -9 -0.62 0.68
 16 1 -9 0.1 0.47
 15 -1 -9 -0.02 0.36
 15 -1 -9 0.3 0.79
 15 1 -9 1.38 0.89
 15 1 -9 0.14 0.46
 14 -1 -9 0.67 0.71
 14 -1 -9 0 0.35
 14 1 -9 0.44 0.7
 14 1 -9 0.37 0.43
 13 -1 -9 -0.09 0.36
 13 -1 -9 -0.15 0.55
 13 1 -9 0.02 0.65
 13 1 -9 -0.17 0.33
 12 -1 -9 0.6 0.65
 12 -1 -9 0.92 0.36
 12 1 -9 0.24 0.58
 12 1 -9 0.91 0.37
 11 -1 -9 -0.06 0.47
 11 -1 -9 -0.29 0.31
 11 1 -9 -0.12 0.3
 11 1 -9 -0.05 0.07
 11 1 -9 0.35 0.61
 10 -1 -9 0.59 0.1
 10 -1 -9 0.81 0.36
 10 -1 -9 0.87 0.59
 10 1 -9 0.61 0.53
 10 1 -9 0.52 0.11
 10 1 -9 0.45 0.33
 9 -1 -9 0.61 0.37
 9 -1 -9 0.42 0.48
 9 1 -9 0.5 0.12
 9 1 -9 0.7 0.48
 9 1 -9 -0.09 0.28
 -8 -1 9 1.73 0.23
 8 -1 -9 1.68 0.19
 8 -1 -9 0.83 0.52
 8 1 -9 2.63 0.67
 8 1 -9 1.99 0.44
 8 1 -9 1.72 0.19
 7 -1 -9 0.85 0.15
 7 -1 -9 0.87 0.45
 -7 -1 9 0.75 0.14
 7 1 -9 1.01 0.12
 -7 1 9 0.76 0.15
 7 1 -9 0.27 0.38
 7 1 -9 0.72 0.15
 -6 -1 9 3.81 0.27
 6 -1 -9 3.75 0.28
 6 1 -9 3.88 0.29
 -6 1 9 4.31 0.29
 -5 -1 9 2.21 0.23
 5 -1 -9 2.36 0.24
 5 1 -9 2.12 0.24
 -5 1 9 2.49 0.26
 4 -1 -9 0.12 0.14
 -4 -1 9 0.1 0.12
 -4 1 9 0.28 0.14
 4 1 -9 0.19 0.16
 -3 -1 9 0.66 0.17
 3 -1 -9 0.93 0.2
 -3 1 9 0.82 0.19
 3 1 -9 0.83 0.18
 2 -1 -9 0.08 0.15
 -2 -1 9 0.07 0.13
 -2 1 9 0.03 0.14
 2 1 -9 -0.03 0.15
 -1 -1 9 0.02 0.13
 1 -1 -9 -0.01 0.15
 -1 1 9 -0.06 0.14
 1 1 -9 -0.06 0.14
 0 -1 9 0.05 0.18
 0 -1 -9 0 0.17
 0 1 9 -0.02 0.17
 0 1 -9 -0.08 0.18
 -1 -1 -9 0.42 0.2
 1 -1 9 0.24 0.2
 1 1 9 0.77 0.22
 -1 1 -9 0.08 0.2
 -2 -1 -9 0.15 0.18
 2 -1 9 0.22 0.21
 2 1 9 -0.03 0.18
 -2 1 -9 0.31 0.23
 3 -1 9 5.27 0.5
 -3 -1 -9 4.56 0.47
 -3 1 -9 5.73 0.54
 3 1 9 4.96 0.48
 -4 -1 -9 0.17 0.24
 4 -1 9 0.58 0.25
 -4 1 -9 0.35 0.23
 4 1 9 0.42 0.26
 -5 -1 -9 10.57 0.69
 5 -1 9 8.52 0.64
 -5 1 -9 7.96 0.63
 5 1 9 9.06 0.66
 -6 -1 -9 2.66 0.43
 6 -1 9 1.53 0.36
 -6 1 -9 2.14 0.39
 6 1 9 1.78 0.39
 -7 -1 -9 7.91 0.71
 7 -1 9 6.91 0.65
 -7 1 -9 9.77 0.7
 7 1 9 7.77 0.71
 8 -1 9 0.32 0.3
 -8 -1 -9 0.16 0.3
 8 1 9 0.76 0.34
 9 -1 9 9.08 0.8
 9 1 9 9.21 0.83
 10 -1 9 0.3 0.36
 10 1 9 0.65 0.43
 11 -1 9 4.22 0.65
 11 1 9 6.34 0.74
 19 -2 -9 0.32 0.59
 19 2 -9 0.94 0.65
 18 -2 -9 3.79 0.77
 18 2 -9 3.63 0.84
 17 -2 -9 0.09 0.76
 17 -2 -9 0 0.48
 17 2 -9 0.05 0.53
 17 2 -9 0.32 0.98
 16 -2 -9 2.77 0.67
 16 -2 -9 2.72 1.07
 16 2 -9 3.57 1.21
 16 2 -9 2.93 0.65
 15 -2 -9 0.04 0.37
 15 -2 -9 -0.8 0.6
 15 2 -9 -0.14 0.41
 15 2 -9 0.53 0.74
 14 -2 -9 1.37 0.45
 14 -2 -9 2.24 0.95
 14 2 -9 2.74 0.58
 14 2 -9 2.26 0.94
 13 -2 -9 0.03 0.36
 13 -2 -9 -0.03 0.56
 13 2 -9 0.06 0.39
 13 2 -9 0.3 0.64
 12 -2 -9 1.85 0.47
 12 -2 -9 0.92 0.69
 12 2 -9 2.86 0.55
 12 2 -9 1.69 0.71
 11 -2 -9 0.42 0.36
 11 -2 -9 -0.05 0.51
 11 2 -9 0.14 0.09
 11 2 -9 -0.07 0.31
 11 2 -9 -0.25 0.57
 10 -2 -9 -0.11 0.31
 10 -2 -9 0.15 0.1
 10 -2 -9 0.44 0.53
 10 2 -9 0.06 0.31
 10 2 -9 0.2 0.11
 10 2 -9 1.03 0.61
 9 -2 -9 0.35 0.45
 9 -2 -9 0.51 0.12
 9 -2 -9 0.41 0.32
 9 2 -9 0.48 0.13
 9 2 -9 1 0.37
 9 2 -9 0.56 0.5
 -8 -2 9 0.15 0.1
 8 -2 -9 0.19 0.11
 8 -2 -9 0.33 0.39
 8 2 -9 0.1 0.45
 8 2 -9 -0.01 0.11
 8 2 -9 -0.17 0.28
 7 -2 -9 -0.03 0.36
 7 -2 -9 0.1 0.12
 -7 -2 9 0.17 0.11
 -7 2 9 -0.08 0.11
 7 2 -9 0.52 0.14
 7 2 -9 0.18 0.13
 -6 -2 9 1.21 0.18
 6 -2 -9 0.87 0.17
 -6 2 9 0.88 0.17
 6 2 -9 1.3 0.2
 -5 -2 9 0.32 0.14
 5 -2 -9 0.41 0.16
 5 2 -9 0.32 0.15
 -5 2 9 0.38 0.15
 4 -2 -9 3.32 0.31
 -4 -2 9 3.72 0.33
 -4 2 9 3.13 0.31
 4 2 -9 4.58 0.35
 -3 -2 9 3.77 0.34
 3 -2 -9 3.87 0.34
 -3 2 9 4.57 0.37
 3 2 -9 3.66 0.35
 2 -2 -9 5.1 0.39
 -2 -2 9 5.7 0.4
 2 2 -9 6 0.43
 -2 2 9 5.32 0.4
 1 -2 -9 5.2 0.39
 -1 -2 9 4.24 0.38
 -1 2 9 5.31 0.39
 1 2 -9 3.83 0.38
 0 -2 9 8.11 0.5
 0 -2 -9 7.25 0.5
 0 2 9 7.84 0.51
 0 2 -9 6.82 0.49
 1 -2 9 10.29 0.59
 -1 -2 -9 9.22 0.57
 -1 2 -9 9.22 0.59
 1 2 9 8.43 0.56
 -2 -2 -9 11.41 0.65
 2 -2 9 10.89 0.64
 -2 2 -9 12.38 0.67
 2 2 9 12.1 0.66
 -3 -2 -9 10.74 0.67
 3 -2 9 10.58 0.66
 3 2 9 10.77 0.68
 -3 2 -9 11.14 0.68
 -4 -2 -9 5.94 0.56
 4 -2 9 5.64 0.54
 4 2 9 5.84 0.56
 -4 2 -9 7.39 0.62
 5 -2 9 6.34 0.59
 -5 -2 -9 5.94 0.56
 5 2 9 6.19 0.56
 -5 2 -9 6.01 0.6
 -6 -2 -9 3.57 0.48
 6 -2 9 2.81 0.44
 -6 2 -9 3 0.46
 6 2 9 2.12 0.42
 7 -2 9 1.7 0.41
 -7 -2 -9 1.59 0.4
 7 2 9 1.52 0.4
 -7 2 -9 1.33 0.36
 8 -2 9 0.23 0.29
 -8 -2 -9 -0.35 0.26
 8 2 9 0.33 0.33
 9 -2 9 0.31 0.35
 9 2 9 0.4 0.37
 10 -2 9 0.15 0.35
 10 2 9 -0.07 0.37
 11 -2 9 0.67 0.43
 11 2 9 0.58 0.44
 19 -3 -9 -0.48 0.57
 19 3 -9 0.31 0.6
 18 -3 -9 -0.82 0.49
 18 3 -9 -0.47 0.56
 17 -3 -9 -0.08 0.89
 17 -3 -9 0.13 0.48
 17 3 -9 -0.59 0.49
 17 3 -9 -0.05 0.95
 16 -3 -9 0.59 0.48
 16 -3 -9 0.33 0.77
 16 3 -9 -0.28 0.88
 16 3 -9 0.08 0.5
 15 -3 -9 0.22 0.73
 15 -3 -9 -0.28 0.4
 15 3 -9 -0.5 0.64
 15 3 -9 -0.33 0.43
 14 -3 -9 3.24 0.94
 14 -3 -9 3.1 0.59
 14 3 -9 2.5 0.58
 14 3 -9 2.23 0.83
 13 -3 -9 0.15 0.56
 13 -3 -9 -0.06 0.35
 13 3 -9 0.26 0.67
 13 3 -9 0.48 0.38
 12 -3 -9 2.77 0.51
 12 -3 -9 3.64 0.91
 12 3 -9 2.67 0.79
 12 3 -9 3.87 0.24
 12 3 -9 3.15 0.56
 11 -3 -9 -0.28 0.3
 11 -3 -9 0.03 0.51
 11 3 -9 -0.41 0.56
 11 3 -9 0.38 0.13
 11 3 -9 0.64 0.37
 10 -3 -9 9.81 0.43
 10 -3 -9 10.64 0.84
 10 -3 -9 8.47 1.06
 10 3 -9 9.48 0.43
 10 3 -9 7.7 1.03
 10 3 -9 8.94 0.78
 9 -3 -9 0.46 0.44
 9 -3 -9 -0.1 0.1
 9 3 -9 0.07 0.29
 9 3 -9 -0.27 0.48
 9 3 -9 0.07 0.13
 -8 -3 9 10.19 0.45
 8 -3 -9 9.56 0.43
 8 -3 -9 9 0.97
 8 3 -9 8.55 0.44
 8 3 -9 10.32 0.83
 8 3 -9 8.33 1.06
 7 -3 -9 0.62 0.44
 7 -3 -9 0.77 0.16
 -7 -3 9 0.17 0.12
 -7 3 9 0.56 0.16
 7 3 -9 0.55 0.19
 7 3 -9 0.44 0.16
 7 3 -9 -0.01 0.38
 -6 -3 9 5.11 0.34
 -6 3 9 4.38 0.34
 6 3 -9 4.86 0.34
 6 3 -9 4.79 0.36
 -5 -3 9 0.23 0.14
 5 3 -9 0.34 0.17
 -5 3 9 0.14 0.15
 -4 -3 9 8.59 0.47
 4 -3 -9 8.18 0.47
 4 3 -9 8.36 0.48
 -4 3 9 8.53 0.47
 3 -3 -9 0.06 0.15
 -3 -3 9 0.1 0.14
 3 3 -9 0.19 0.18
 -3 3 9 0.13 0.16
 2 -3 -9 2.51 0.32
 -2 -3 9 3.03 0.34
 2 3 -9 2.79 0.35
 -2 3 9 2.39 0.31
 1 -3 -9 0.16 0.18
 -1 -3 9 0.11 0.15
 -1 3 9 -0.06 0.17
 1 3 -9 -0.02 0.16
 0 -3 9 0.12 0.18
 0 -3 -9 0.2 0.21
 0 3 -9 0.16 0.22
 0 3 9 0.16 0.21
 1 -3 9 0.65 0.23
 -1 -3 -9 0.57 0.22
 -1 3 -9 0.78 0.28
 1 3 9 0.31 0.21
 2 -3 9 1.89 0.32
 -2 -3 -9 1.84 0.33
 2 3 9 2.48 0.38
 -2 3 -9 2.02 0.33
 -3 -3 -9 1.16 0.28
 3 -3 9 1.47 0.3
 3 3 9 1.41 0.3
 -3 3 -9 1.49 0.33
 -4 -3 -9 13.09 0.77
 4 -3 9 14.13 0.78
 4 3 9 13.97 0.81
 -4 3 -9 14.37 0.8
 5 -3 9 7 0.64
 -5 -3 -9 7.66 0.66
 5 3 9 6.96 0.65
 -5 3 -9 6.53 0.63
 -6 -3 -9 6.47 0.61
 6 -3 9 7.16 0.66
 6 3 9 6.65 0.64
 -6 3 -9 5.69 0.6
 7 -3 9 5.75 0.6
 -7 3 -9 7.2 0.68
 7 3 9 8.87 0.77
 8 -3 9 13.45 0.88
 8 3 9 14.92 0.94
 9 -3 9 10.19 0.86
 9 3 9 7.45 0.75
 10 -3 9 8.23 0.78
 10 3 9 7.38 0.79
 11 -3 9 9.48 0.87
 11 3 9 9.21 0.91
 19 -4 -9 0.08 0.58
 19 4 -9 -0.54 0.57
 18 -4 -9 12.52 1.2
 18 4 -9 10.8 1.17
 17 -4 -9 0.09 0.88
 17 -4 -9 0.32 0.51
 17 4 -9 0.13 0.5
 17 4 -9 0.29 0.88
 16 -4 -9 12.73 1.59
 16 -4 -9 11.44 1.06
 16 4 -9 13.89 1.26
 16 4 -9 15.95 1.77
 15 -4 -9 -0.44 0.39
 15 -4 -9 0.07 0.74
 15 4 -9 0.24 0.47
 15 4 -9 0.97 0.81
 14 -4 -9 7.2 1.17
 14 -4 -9 6.37 0.79
 14 4 -9 6.64 0.78
 14 4 -9 10.32 1.36
 13 -4 -9 1.11 0.73
 13 -4 -9 -0.11 0.31
 13 4 -9 -0.02 0.37
 13 4 -9 0.55 0.64
 12 -4 -9 6.94 0.77
 12 -4 -9 6.63 1.05
 12 4 -9 5.83 0.72
 12 4 -9 4.99 0.9
 12 4 -9 6.29 0.35
 11 -4 -9 0.07 0.3
 11 -4 -9 0.1 0.5
 11 -4 -9 -0.22 0.13
 11 4 -9 0.6 0.34
 11 4 -9 -0.03 0.14
 11 4 -9 0.05 0.58
 10 -4 -9 1.07 0.42
 10 -4 -9 1.51 0.62
 10 -4 -9 1.27 0.22
 10 4 -9 1.39 0.41
 10 4 -9 1.21 0.57
 10 4 -9 0.95 0.2
 9 -4 -9 0.08 0.13
 9 -4 -9 0.22 0.43
 9 4 -9 0.24 0.3
 9 4 -9 -0.1 0.15
 9 4 -9 -0.2 0.51
 8 -4 -9 0.21 0.42
 8 -4 -9 0.38 0.15
 -8 -4 9 0.2 0.13
 8 4 -9 1.16 0.57
 8 4 -9 0.6 0.32
 8 4 -9 0.27 0.17
 7 -4 -9 -0.02 0.11
 -7 -4 9 0.24 0.14
 7 -4 -9 0.12 0.38
 -7 4 9 -0.03 0.15
 7 4 -9 -0.26 0.44
 7 4 -9 -0.03 0.19
 7 4 -9 0.13 0.17
 -6 -4 9 5.78 0.37
 6 -4 -9 4.84 0.35
 6 4 -9 5.35 0.42
 -6 4 9 4.97 0.38
 6 4 -9 6.28 0.42
 -5 -4 9 0.13 0.13
 5 -4 -9 0 0.14
 5 4 -9 0.08 0.17
 -5 4 9 -0.17 0.13
 5 4 -9 -0.01 0.15
 -4 -4 9 7.51 0.45
 4 -4 -9 8.24 0.47
 -4 4 9 7.41 0.47
 4 4 -9 7.57 0.47
 -3 -4 9 0 0.16
 -3 4 9 -0.1 0.13
 3 4 -9 0.24 0.19
 -2 -4 9 27.29 1.04
 -2 4 9 27.29 1.06
 -1 -4 9 2.54 0.35
 1 4 -9 2.5 0.36
 -1 4 9 1.88 0.3
 0 -4 9 37.31 1.37
 0 4 9 37.17 1.38
 0 4 -9 37.96 1.39
 1 -4 9 7.2 0.52
 -1 -4 -9 6.68 0.5
 -1 4 -9 5.86 0.54
 1 4 9 5.29 0.49
 2 -4 9 29.16 1.16
 -2 4 -9 27.19 1.15
 2 4 9 29.48 1.2
 3 -4 9 4.46 0.47
 3 4 9 4.33 0.5
 -3 4 -9 4.17 0.5
 4 -4 9 11.73 0.72
 -4 4 -9 12.39 0.76
 4 4 9 10.01 0.73
 5 -4 9 1.38 0.32
 5 4 9 1.47 0.36
 -5 4 -9 1.76 0.37
 6 -4 9 2.88 0.46
 -6 -4 -9 3.25 0.47
 -6 4 -9 3.4 0.48
 6 4 9 2.64 0.45
 7 -4 9 1.43 0.39
 -7 -4 -9 1.83 0.4
 -7 4 -9 1.26 0.39
 7 4 9 1.42 0.4
 8 -4 9 0.19 0.3
 -8 -4 -9 0.05 0.3
 8 4 9 0.33 0.36
 9 -4 9 0.47 0.36
 9 4 9 0.37 0.39
 10 -4 9 0.8 0.42
 10 4 9 0.95 0.47
 18 -5 -9 2.45 0.68
 18 5 -9 1.09 0.67
 17 -5 -9 -0.18 0.46
 17 -5 -9 0.56 0.82
 17 5 -9 0.57 0.95
 17 5 -9 -0.01 0.5
 16 -5 -9 -0.26 0.45
 16 -5 -9 0.62 0.83
 16 5 -9 0.71 0.54
 16 5 -9 0.03 0.78
 15 -5 -9 0.53 0.47
 15 -5 -9 0.01 0.73
 15 5 -9 0.43 0.72
 15 5 -9 0.12 0.46
 14 -5 -9 2.66 0.6
 14 5 -9 2.63 0.88
 14 5 -9 3.32 0.64
 13 -5 -9 0.11 0.51
 13 -5 -9 -0.04 0.37
 13 5 -9 -0.47 0.61
 13 5 -9 0.01 0.37
 13 5 -9 0 0.15
 12 -5 -9 15.01 1.47
 12 -5 -9 12.22 0.97
 12 5 -9 12.24 0.56
 12 5 -9 12.79 1.32
 12 5 -9 11.28 0.89
 11 -5 -9 0 0.3
 11 -5 -9 0.21 0.17
 11 -5 -9 -0.32 0.39
 11 5 -9 0.22 0.17
 11 5 -9 0.26 0.58
 11 5 -9 0.52 0.38
 10 -5 -9 19.48 0.83
 10 -5 -9 21.94 1.47
 10 5 -9 18.4 1.05
 10 5 -9 19.86 0.79
 10 5 -9 20.17 1.48
 9 -5 -9 0.1 0.39
 9 -5 -9 0.46 0.18
 9 5 -9 0.58 0.32
 9 5 -9 0.64 0.55
 9 5 -9 0.24 0.18
 -8 -5 9 23.94 0.9
 8 -5 -9 25.59 1.46
 8 -5 -9 23.94 0.9
 8 5 -9 22.98 0.91
 8 5 -9 25.02 1.55
 8 5 -9 24.15 1.13
 7 -5 -9 -0.07 0.13
 7 -5 -9 -0.42 0.32
 -7 -5 9 0.09 0.14
 7 5 -9 -0.03 0.18
 -7 5 9 0.04 0.16
 7 5 -9 0.1 0.44
 7 5 -9 -0.04 0.24
 6 -5 -9 29.1 1.52
 -6 -5 9 28.85 1.06
 6 -5 -9 29.99 1.07
 -6 5 9 30.59 1.09
 6 5 -9 30.47 1.18
 6 5 -9 29.2 1.09
 5 -5 -9 0.4 0.17
 -5 -5 9 0.4 0.18
 -5 5 9 0.35 0.19
 5 5 -9 0.39 0.22
 5 5 -9 0.3 0.21
 -4 -5 9 10.69 0.57
 4 -5 -9 11.76 0.6
 4 5 -9 11.68 0.63
 4 5 -9 12.09 0.65
 -4 5 9 10.94 0.61
 3 -5 -9 0.84 0.23
 -3 -5 9 1 0.24
 -3 5 9 1.02 0.25
 3 5 -9 1.23 0.28
 2 -5 -9 6.45 0.48
 -2 -5 9 6.97 0.49
 -2 5 9 6.96 0.51
 2 5 -9 6.43 0.54
 1 -5 -9 0.3 0.2
 -1 -5 9 -0.05 0.18
 -1 5 9 -0.02 0.2
 1 5 -9 -0.02 0.22
 0 -5 9 -0.02 0.19
 0 -5 -9 0.07 0.21
 0 5 9 0.51 0.26
 0 5 -9 0.61 0.29
 -1 -5 -9 0.4 0.22
 1 -5 9 0.7 0.25
 -1 5 -9 0.7 0.26
 1 5 9 0.49 0.25
 -2 -5 -9 9.53 0.64
 2 -5 9 11.01 0.68
 -2 5 -9 10.21 0.69
 2 5 9 10.73 0.68
 -3 -5 -9 2.77 0.41
 3 -5 9 2.26 0.38
 3 5 9 2.56 0.42
 -3 5 -9 2.14 0.38
 -4 -5 -9 11.89 0.77
 4 -5 9 12.89 0.77
 4 5 9 12.66 0.81
 -4 5 -9 12.81 0.79
 -5 -5 -9 2.06 0.41
 5 -5 9 1.1 0.31
 -5 5 -9 1.26 0.37
 5 5 9 0.65 0.34
 -6 -5 -9 31.67 1.39
 6 -5 9 32.78 1.39
 -6 5 -9 31.82 1.37
 6 5 9 34.12 1.44
 7 -5 9 8.74 0.76
 -7 -5 -9 8.32 0.76
 -7 5 -9 9.32 0.78
 7 5 9 8.32 0.77
 -8 -5 -9 25.26 1.26
 8 -5 9 24.08 1.22
 8 5 9 25.48 1.29
 9 -5 9 11.03 0.85
 9 5 9 11.13 0.97
 10 -5 9 18.55 1.15
 10 5 9 21.09 1.24
 18 -6 -9 21.72 1.5
 18 6 -9 21.99 1.6
 17 -6 -9 0.02 0.53
 17 -6 -9 1.01 0.92
 17 6 -9 0.44 0.59
 16 -6 -9 23.7 1.46
 16 -6 -9 22.7 1.94
 16 6 -9 19.15 1.38
 16 6 -9 25.61 1.91
 15 -6 -9 0.43 0.76
 15 -6 -9 0.9 0.5
 15 6 -9 0.52 0.51
 15 6 -9 0.89 0.73
 14 -6 -9 19.85 1.73
 14 -6 -9 22.21 1.32
 14 6 -9 20.79 1.67
 14 6 -9 20.77 1.27
 13 -6 -9 1.29 0.7
 13 -6 -9 0.96 0.47
 13 6 -9 1.08 0.46
 13 6 -9 0.87 0.25
 13 6 -9 1.57 0.73
 12 -6 -9 7.13 0.83
 12 -6 -9 6.45 1.02
 12 6 -9 4.39 0.87
 12 6 -9 5.49 0.7
 12 6 -9 5.93 0.45
 11 -6 -9 -0.03 0.47
 11 -6 -9 0.4 0.22
 11 6 -9 -0.24 0.51
 11 6 -9 -0.02 0.19
 11 6 -9 0.03 0.33
 10 -6 -9 5.9 0.91
 10 -6 -9 4.02 0.42
 10 6 -9 3.74 0.38
 10 6 -9 3.37 0.73
 10 6 -9 4.61 0.58
 9 -6 -9 2.2 0.32
 9 -6 -9 2.04 0.58
 9 6 -9 2.12 0.32
 9 6 -9 1.71 0.61
 9 6 -9 1.99 0.43
 8 -6 -9 0.88 0.23
 -8 -6 9 0.64 0.2
 8 -6 -9 0.76 0.43
 8 6 -9 0.44 0.23
 8 6 -9 0.64 0.32
 8 6 -9 0.85 0.53
 7 -6 -9 1.05 0.45
 7 -6 -9 0.24 0.17
 -7 -6 9 0.12 0.16
 7 6 -9 0.35 0.31
 7 6 -9 0.2 0.45
 7 6 -9 0.3 0.23
 -6 -6 9 6.18 0.43
 6 -6 -9 6.21 0.44
 6 -6 -9 4.47 0.69
 6 6 -9 6.04 0.59
 6 6 -9 4.88 0.45
 -6 6 9 5.15 0.46
 -5 -6 9 1.63 0.27
 5 -6 -9 1.39 0.26
 5 6 -9 1.99 0.37
 -5 6 9 1.63 0.29
 5 6 -9 1.73 0.32
 4 -6 -9 19.72 0.85
 -4 -6 9 19.54 0.85
 4 6 -9 19.01 0.91
 -4 6 9 19.22 0.87
 4 6 -9 19.45 0.87
 -3 -6 9 0.06 0.16
 3 -6 -9 0.05 0.18
 -3 6 9 0.23 0.21
 3 6 -9 0.25 0.24
 3 6 -9 0.29 0.24
 -2 -6 9 59.55 2.03
 2 -6 -9 62.19 2.05
 -2 6 9 63.97 2.08
 2 6 -9 64.34 2.09
 1 -6 -9 0.43 0.21
 -1 -6 9 0.1 0.18
 1 6 -9 0.15 0.22
 -1 6 9 0.12 0.22
 0 -6 -9 48.48 1.74
 0 -6 9 51.28 1.75
 0 6 -9 50.38 1.77
 0 6 9 47.8 1.76
 1 -6 9 0.75 0.28
 -1 -6 -9 0.56 0.28
 -1 6 -9 0.13 0.27
 1 6 9 0.62 0.32
 -2 -6 -9 51.51 1.84
 2 -6 9 50.36 1.83
 -2 6 -9 53.27 1.87
 2 6 9 50.66 1.85
 3 -6 9 1.63 0.34
 -3 -6 -9 1.84 0.35
 -3 6 -9 1.66 0.36
 3 6 9 1.96 0.39
 4 -6 9 26.83 1.22
 -4 -6 -9 27.86 1.24
 4 6 9 28.54 1.28
 -4 6 -9 27.38 1.25
 5 -6 9 9.72 0.72
 -5 -6 -9 9.99 0.75
 5 6 9 11.17 0.89
 -5 6 -9 10.36 0.76
 -6 -6 -9 13.15 0.86
 6 -6 9 11.21 0.79
 -6 6 -9 10.99 0.81
 6 6 9 10.65 0.85
 -7 -6 -9 1.54 0.44
 7 -6 9 2.62 0.48
 7 6 9 2.03 0.49
 -7 6 -9 1.73 0.46
 -8 -6 -9 0.39 0.37
 8 -6 9 0.13 0.36
 8 6 9 -0.27 0.37
 9 -6 9 -0.02 0.33
 9 6 9 0.2 0.4
 10 -6 9 1.56 0.47
 10 6 9 0.82 0.52
 18 -7 -9 1.35 0.66
 18 7 -9 1.55 0.71
 17 -7 -9 0.59 0.58
 17 7 -9 0.31 0.54
 16 -7 -9 0.38 0.49
 16 -7 -9 0.29 0.75
 16 7 -9 0.97 0.81
 16 7 -9 1.01 0.58
 15 -7 -9 0.58 0.49
 15 -7 -9 -0.61 0.62
 15 7 -9 0.56 0.74
 15 7 -9 0.36 0.49
 14 -7 -9 7.08 0.89
 14 -7 -9 6.4 1.05
 14 7 -9 5.57 1.01
 14 7 -9 7.96 0.89
 14 7 -9 6.84 0.52
 13 -7 -9 0.81 0.45
 13 -7 -9 0.77 0.59
 13 7 -9 0.21 0.41
 13 7 -9 0.8 0.63
 13 7 -9 1.11 0.3
 12 -7 -9 28.89 1.81
 12 7 -9 30.13 1.76
 12 7 -9 25.82 1.35
 12 7 -9 27.74 1.1
 11 -7 -9 1.07 0.58
 11 -7 -9 0.47 0.25
 11 7 -9 0.63 0.26
 11 7 -9 0.83 0.39
 11 7 -9 0.3 0.54
 10 -7 -9 39.01 1.95
 10 -7 -9 41.93 1.49
 10 7 -9 41.73 2.02
 10 7 -9 41.28 1.46
 10 7 -9 39.17 1.62
 9 -7 -9 -0.79 0.33
 9 -7 -9 0.06 0.23
 9 7 -9 0.33 0.3
 9 7 -9 0.01 0.44
 9 7 -9 0.24 0.25
 8 -7 -9 49.2 2.11
 8 -7 -9 45.74 1.65
 -8 -7 9 48.6 1.74
 8 7 -9 48.72 1.68
 8 7 -9 47.42 1.74
 8 7 -9 51.83 2.23
 -7 -7 9 1 0.25
 7 -7 -9 1.06 0.26
 7 -7 -9 1.01 0.44
 7 7 -9 1.79 0.6
 7 7 -9 1.06 0.31
 6 -7 -9 36.73 1.72
 6 -7 -9 36.95 1.36
 -6 -7 9 38.98 1.37
 6 7 -9 37.44 1.56
 6 7 -9 38.18 1.4
 -6 7 9 37.02 1.38
 5 -7 -9 -0.04 0.18
 -5 -7 9 0.12 0.18
 -5 7 9 -0.22 0.21
 5 7 -9 -0.29 0.25
 5 7 -9 -0.01 0.23
 4 -7 -9 27.66 1.11
 -4 -7 9 26.92 1.09
 4 7 -9 28.47 1.22
 -4 7 9 26.95 1.13
 4 7 -9 25.08 1.11
 3 -7 -9 0.17 0.21
 -3 -7 9 0.05 0.19
 3 7 -9 0.11 0.25
 3 7 -9 0.09 0.26
 -3 7 9 -0.08 0.23
 -2 -7 9 4.17 0.46
 2 -7 -9 2.69 0.37
 2 7 -9 4.18 0.49
 2 7 -9 4.21 0.51
 -2 7 9 3.4 0.45
 1 -7 -9 0.74 0.28
 -1 -7 9 0.41 0.25
 -1 7 9 0.25 0.28
 1 7 -9 0.67 0.32
 0 -7 9 0.39 0.23
 0 -7 -9 -0.2 0.22
 0 7 -9 0.15 0.25
 0 7 9 0.14 0.28
 1 -7 9 0.25 0.27
 -1 -7 -9 -0.04 0.24
 -1 7 -9 0.03 0.28
 1 7 9 0.42 0.31
 -2 -7 -9 8.98 0.68
 2 -7 9 8.25 0.62
 2 7 9 9.46 0.73
 -2 7 -9 8.8 0.67
 -3 -7 -9 0.64 0.33
 3 -7 9 0.57 0.29
 -3 7 -9 0.32 0.3
 3 7 9 0.93 0.38
 -4 -7 -9 27.67 1.28
 4 -7 9 30.17 1.28
 4 7 9 25.4 1.28
 -4 7 -9 26.64 1.27
 5 -7 9 1.99 0.42
 -5 -7 -9 2.17 0.47
 5 7 9 1.26 0.44
 -5 7 -9 1.45 0.41
 6 -7 9 38.1 1.6
 -6 -7 -9 40.9 1.66
 -6 7 -9 38.51 1.62
 6 7 9 37.43 1.66
 7 -7 9 7.72 0.75
 -7 -7 -9 6.71 0.75
 7 7 9 8.73 0.86
 -8 -7 -9 38.74 1.85
 8 -7 9 40.34 1.72
 8 7 9 42.58 1.83
 9 -7 9 9.81 0.88
 9 7 9 9.14 0.97
 17 -8 -9 0.69 0.55
 17 8 -9 0.3 0.56
 16 -8 -9 34.95 1.84
 16 -8 -9 36.3 2.31
 16 8 -9 33.99 1.83
 15 -8 -9 0.64 0.72
 15 -8 -9 0.49 0.53
 15 8 -9 1.07 0.54
 15 8 -9 0.7 0.73
 14 -8 -9 29.08 1.95
 14 -8 -9 31.71 1.64
 14 8 -9 30.11 1.23
 14 8 -9 32.36 1.6
 14 8 -9 32.81 1.92
 13 -8 -9 1.35 0.72
 13 8 -9 1.59 0.36
 13 8 -9 1.42 0.68
 13 8 -9 1.34 0.48
 12 -8 -9 24.71 1.02
 12 -8 -9 24.78 1.65
 12 8 -9 25.93 1.1
 12 8 -9 22.08 1.24
 12 8 -9 26.92 1.63
 11 -8 -9 4.73 0.49
 11 -8 -9 4.79 0.82
 11 8 -9 3.82 0.88
 11 8 -9 4.01 0.48
 11 8 -9 4.47 0.8
 10 -8 -9 7.54 0.96
 10 -8 -9 6.78 0.58
 10 8 -9 5.53 0.56
 10 8 -9 6.11 0.87
 9 -8 -9 -0.02 0.24
 9 -8 -9 0.09 0.4
 9 8 -9 0.16 0.46
 9 8 -9 0.11 0.28
 8 -8 -9 0.97 0.44
 8 -8 -9 0.13 0.25
 8 8 -9 0.97 0.5
 8 8 -9 0.3 0.3
 7 -8 -9 2.74 0.56
 7 -8 -9 2.23 0.36
 -7 -8 9 2.11 0.36
 7 8 -9 2.22 0.4
 7 8 -9 2.31 0.62
 6 -8 -9 18.44 1.12
 6 -8 -9 17.87 0.87
 -6 -8 9 16.76 0.84
 6 8 -9 16.5 0.89
 -6 8 9 15.68 0.87
 6 8 -9 18.05 1.07
 5 -8 -9 1.01 0.4
 -5 -8 9 1.87 0.34
 5 -8 -9 1.36 0.32
 5 8 -9 2.03 0.4
 5 8 -9 1.87 0.46
 -5 8 9 1.48 0.35
 4 -8 -9 47.26 1.69
 -4 -8 9 48.61 1.69
 4 8 -9 47.19 1.83
 -4 8 9 46.96 1.72
 4 8 -9 44.65 1.69
 3 -8 -9 0.78 0.27
 -3 -8 9 0.45 0.25
 3 8 -9 0.89 0.32
 3 8 -9 1.04 0.37
 -3 8 9 0.99 0.33
 2 -8 -9 62.78 2.18
 -2 -8 9 65.43 2.18
 -2 8 9 63.33 2.21
 2 8 -9 64.13 2.28
 2 8 -9 64.74 2.21
 1 -8 -9 0.66 0.3
 -1 -8 9 -0.01 0.21
 1 8 -9 0.12 0.27
 -1 8 9 0.16 0.31
 1 8 -9 0.2 0.3
 0 -8 9 85.51 2.84
 0 -8 -9 91.52 2.89
 0 8 9 90.46 2.91
 0 8 -9 85.78 2.88
 1 -8 9 0.63 0.28
 -1 -8 -9 0.11 0.23
 1 8 9 1.27 0.36
 -1 8 -9 0.22 0.3
 -2 -8 -9 58.15 2.09
 2 -8 9 56.81 2.08
 -2 8 -9 59.48 2.13
 2 8 9 58.48 2.14
 -3 -8 -9 3.03 0.51
 3 -8 9 3.23 0.5
 3 8 9 2.12 0.5
 -3 8 -9 3.3 0.54
 4 -8 9 39.49 1.61
 -4 -8 -9 40.02 1.64
 4 8 9 37.15 1.65
 -4 8 -9 39.37 1.64
 -5 -8 -9 0.98 0.38
 5 -8 9 1.06 0.38
 -5 8 -9 1.55 0.45
 5 8 9 0.49 0.38
 -6 -8 -9 6.78 0.75
 6 -8 9 9.47 0.81
 6 8 9 7.72 0.82
 -6 8 -9 8.36 0.82
 -7 -8 -9 3 0.53
 7 -8 9 4.35 0.63
 7 8 9 3.03 0.58
 -8 -8 -9 1.43 0.73
 8 -8 9 0.36 0.37
 8 8 9 0.16 0.46
 9 -8 9 0.31 0.4
 9 8 9 0.58 0.51
 17 -9 -9 -0.34 0.5
 16 -9 -9 0.37 0.55
 15 -9 -9 1.54 0.73
 15 -9 -9 1.68 0.64
 15 9 -9 2.07 0.46
 14 -9 -9 11.34 1.34
 14 9 -9 11.19 0.77
 13 -9 -9 1.03 0.6
 13 9 -9 0.02 0.33
 12 -9 -9 26.94 1.67
 12 -9 -9 25.65 1.11
 12 9 -9 28.14 1.23
 11 -9 -9 0.38 0.3
 11 -9 -9 1.04 0.55
 11 9 -9 0.36 0.83
 11 9 -9 0.17 0.33
 10 -9 -9 49.67 2.24
 10 -9 -9 51.36 1.85
 10 9 -9 51.16 1.87
 10 9 -9 50.17 2.17
 9 -9 -9 0.39 0.39
 9 -9 -9 0.22 0.27
 9 9 -9 -0.1 0.42
 9 9 -9 -0.01 0.3
 8 -9 -9 57.39 2.1
 8 -9 -9 56.8 2.37
 8 9 -9 62.06 2.12
 8 9 -9 63.17 2.42
 7 -9 -9 1.14 0.32
 -7 -9 9 1.11 0.31
 7 -9 -9 0.55 0.39
 7 9 -9 0.44 0.32
 7 9 -9 0.56 0.46
 6 -9 -9 61.59 2.41
 -6 -9 9 63.03 2.17
 6 -9 -9 62.48 2.17
 6 9 -9 62.78 2.21
 6 9 -9 70.47 2.59
 6 9 -9 61.8 2.41
 -5 -9 9 0.71 0.27
 5 -9 -9 1.3 0.32
 5 -9 -9 0.8 0.39
 5 9 -9 1.46 0.39
 5 9 -9 1.1 0.44
 -5 9 9 0.84 0.34
 4 -9 -9 32.38 1.34
 4 -9 -9 34.51 1.54
 -4 -9 9 30.24 1.31
 4 9 -9 33.05 1.53
 -4 9 9 32.22 1.38
 4 9 -9 31.81 1.38
 -3 -9 9 0.29 0.25
 3 -9 -9 0.11 0.24
 -3 9 9 0.07 0.31
 3 9 -9 -0.12 0.32
 3 9 -9 -0.15 0.26
 -2 -9 9 8.43 0.63
 2 -9 -9 6.75 0.64
 -2 9 9 7.17 0.69
 2 9 -9 6.4 0.63
 2 9 -9 8.56 0.8
 -1 -9 9 4.39 0.52
 1 -9 -9 3.51 0.47
 -1 9 9 3.89 0.54
 1 9 -9 6.02 0.68
 1 9 -9 3.97 0.54
 0 -9 9 -0.25 0.24
 0 -9 -9 -0.13 0.25
 0 9 -9 0.02 0.34
 0 9 9 0.22 0.35
 0 9 -9 0.22 0.35
 1 -9 9 0.17 0.27
 -1 -9 -9 0.6 0.3
 -1 9 -9 0.76 0.36
 -1 9 -9 0.43 0.35
 1 9 9 0.48 0.35
 2 -9 9 14.41 0.91
 -2 -9 -9 14.36 0.9
 -2 9 -9 14.31 0.96
 2 9 9 14.96 0.96
 -3 -9 -9 2.25 0.49
 3 -9 9 0.81 0.36
 3 9 9 1.63 0.49
 -3 9 -9 1.48 0.47
 4 -9 9 35.44 1.56
 -4 -9 -9 34.03 1.58
 -4 9 -9 38.18 1.61
 4 9 9 35.83 1.64
 -5 -9 -9 1.07 0.44
 5 -9 9 1.21 0.41
 -5 9 -9 1.39 0.48
 5 9 9 2.13 0.56
 6 -9 9 51.29 2.03
 -6 -9 -9 51.47 2.09
 -6 9 -9 51.04 2.05
 6 9 9 51.4 2.1
 -7 -9 -9 3.97 0.63
 7 -9 9 4.61 0.66
 7 9 9 3.75 0.66
 8 -9 9 37.17 1.72
 8 9 9 38.81 1.85
 15 -10 -9 2.63 0.85
 15 10 -9 3.04 0.52
 14 -10 -9 54.97 2.59
 14 10 -9 51.62 1.96
 13 -10 -9 3.22 0.79
 12 -10 -9 26.34 1.2
 12 -10 -9 30.53 1.76
 12 10 -9 29.21 1.34
 11 -10 -9 3.02 0.48
 11 -10 -9 2.86 0.69
 11 10 -9 2.68 0.52
 10 -10 -9 3.32 0.5
 10 -10 -9 2.8 0.64
 10 10 -9 3.11 0.52
 9 -10 -9 2.23 0.56
 9 -10 -9 3.02 0.48
 9 10 -9 2.09 0.47
 8 -10 -9 -0.17 0.28
 8 -10 -9 0.61 0.39
 8 10 -9 0.4 0.38
 7 -10 -9 1.49 0.38
 7 -10 -9 2.39 0.52
 -7 -10 9 2.16 0.43
 7 10 -9 1.91 0.46
 -6 -10 9 20.57 1.05
 6 -10 -9 19.97 1.06
 6 -10 -9 21.16 1.19
 6 10 -9 19.51 1.1
 6 10 -9 21.56 1.3
 -5 -10 9 6.36 0.63
 5 -10 -9 5.84 0.7
 5 -10 -9 4.78 0.56
 -5 10 9 4.44 0.6
 5 10 -9 5.06 0.61
 5 10 -9 5.82 0.78
 4 -10 -9 47.44 1.84
 4 -10 -9 49.43 1.98
 -4 -10 9 51.84 1.88
 4 10 -9 48.7 1.9
 -4 10 9 46.69 1.88
 4 10 -9 48.44 2.06
 -3 -10 9 3.98 0.52
 3 -10 -9 4.58 0.58
 3 10 -9 4.69 0.67
 3 10 -9 3.36 0.53
 -3 10 9 5.09 0.62
 2 -10 -9 90.53 2.92
 -2 -10 9 86.63 2.89
 2 10 -9 86.05 3.06
 2 10 -9 82.16 2.9
 -2 10 9 87.76 2.96
 -1 -10 9 5.12 0.58
 1 -10 -9 3.78 0.52
 1 10 -9 3.57 0.55
 1 10 -9 4 0.63
 -1 10 9 4.41 0.59
 0 -10 9 56.35 2.05
 0 -10 -9 52.35 2.03
 0 10 9 54.18 2.1
 0 10 -9 51.12 2.05
 0 10 -9 53.02 2.15
 -1 -10 -9 0.87 0.35
 1 -10 9 0.6 0.34
 -1 10 -9 0.82 0.46
 -1 10 -9 0.64 0.41
 1 10 9 0.36 0.38
 2 -10 9 57.15 2.2
 -2 -10 -9 57.6 2.22
 2 10 9 58.18 2.29
 -2 10 -9 60.15 2.26
 -2 10 -9 60.85 2.4
 -3 -10 -9 2.23 0.47
 3 -10 9 1.86 0.43
 -3 10 -9 2.15 0.61
 -3 10 -9 1.44 0.46
 3 10 9 1.95 0.53
 -4 -10 -9 33.31 1.54
 4 -10 9 31.79 1.48
 -4 10 -9 31.09 1.66
 -4 10 -9 29.12 1.45
 4 10 9 30.1 1.57
 5 -10 9 3.06 0.56
 -5 -10 -9 3.77 0.64
 -5 10 -9 2.8 0.55
 5 10 9 4.06 0.74
 -6 -10 -9 10.68 0.97
 6 -10 9 11.79 0.93
 6 10 9 11.2 1.03
 -6 10 -9 11.84 1.04
 7 -10 9 2.47 0.54
 -7 -10 -9 2.25 0.57
 7 10 9 2.26 0.66
 8 -10 9 1.14 0.52
 8 10 9 -0.36 0.53
 15 11 -9 0.62 0.45
 14 -11 -9 14.13 1.42
 14 11 -9 14.21 0.99
 13 -11 -9 0.21 0.52
 13 11 -9 -0.08 0.42
 12 -11 -9 35.64 1.93
 12 -11 -9 35.58 1.46
 12 11 -9 35.44 1.6
 11 -11 -9 0.3 0.33
 11 -11 -9 -0.05 0.45
 11 11 -9 0.13 0.42
 10 -11 -9 81.87 3.1
 10 -11 -9 83.67 2.78
 10 11 -9 80.29 2.85
 9 -11 -9 -0.05 0.3
 9 -11 -9 0.34 0.39
 9 11 -9 0.11 0.42
 8 -11 -9 64.91 2.53
 8 -11 -9 65.38 2.37
 8 11 -9 67.39 2.44
 -7 -11 9 0.2 0.3
 7 -11 -9 0.14 0.34
 7 -11 -9 0.14 0.31
 7 11 -9 0.67 0.43
 -6 -11 9 95.51 3.07
 6 -11 -9 86.87 3.12
 6 -11 -9 89.31 3.05
 6 11 -9 91.14 3.09
 5 -11 -9 0.26 0.29
 -5 -11 9 0.48 0.33
 5 11 -9 0.52 0.4
 5 11 -9 1.27 0.52
 -5 11 9 0.54 0.41
 -4 -11 9 37.39 1.62
 4 -11 -9 39.91 1.65
 -4 11 9 40.16 1.71
 4 11 -9 38.16 1.85
 4 11 -9 38.01 1.7
 3 -11 -9 0.05 0.3
 -3 -11 9 0.18 0.28
 3 11 -9 -0.24 0.43
 -3 11 9 0.07 0.34
 3 11 -9 -0.01 0.39
 -2 -11 9 11.28 0.86
 2 -11 -9 12.09 0.88
 2 11 -9 12.16 1.03
 -2 11 9 12.25 1.03
 2 11 -9 12.53 1.05
 1 -11 -9 1.7 0.48
 -1 -11 9 1.27 0.43
 1 11 -9 1.54 0.51
 1 11 -9 1.85 0.57
 -1 11 9 2.52 0.58
 0 -11 9 3.72 0.58
 0 -11 -9 4.29 0.6
 0 11 -9 4.37 0.74
 0 11 9 3.21 0.61
 0 11 -9 4.15 0.67
 1 -11 9 1.97 0.46
 -1 -11 -9 2.31 0.5
 -1 11 -9 3.78 0.68
 -1 11 -9 2.37 0.54
 1 11 9 2.8 0.61
 -2 -11 -9 8.48 0.82
 2 -11 9 9.53 0.89
 -2 11 -9 9.31 0.95
 2 11 9 8.54 0.89
 -2 11 -9 8.12 0.96
 -3 -11 -9 1.78 0.49
 3 -11 9 0.41 0.4
 -3 11 -9 0.21 0.44
 3 11 9 1.2 0.51
 -3 11 -9 0.34 0.45
 -4 -11 -9 36.16 1.74
 4 -11 9 38.25 1.72
 -4 11 -9 37.57 1.74
 4 11 9 40.62 1.87
 -4 11 -9 37.97 1.92
 5 -11 9 0.73 0.44
 -5 -11 -9 0.59 0.45
 -5 11 -9 -0.01 0.4
 -5 11 -9 0.45 0.56
 5 11 9 0.97 0.56
 6 -11 9 41.15 1.91
 -6 -11 -9 43.38 1.99
 -6 11 -9 45.06 2.19
 6 11 9 47.81 2.12
 -7 -11 -9 1.73 0.6
 7 -11 9 1.09 0.49
 7 11 9 0.86 0.65
 -7 11 -9 1.53 0.69
 14 12 -9 38.48 1.73
 13 12 -9 3.88 0.68
 12 -12 -9 40.44 1.65
 12 12 -9 39.04 1.79
 11 -12 -9 1.87 0.46
 11 12 -9 1.43 0.54
 10 -12 -9 7.43 0.73
 10 12 -9 7.05 0.85
 9 -12 -9 5.91 0.67
 9 12 -9 4.64 0.73
 8 -12 -9 0.95 0.4
 8 12 -9 1.34 0.53
 -7 -12 9 5.85 0.7
 7 -12 -9 5.03 0.67
 7 12 -9 3.74 0.67
 -6 -12 9 26.12 1.28
 6 -12 -9 23.33 1.27
 6 12 -9 22.88 1.35
 5 -12 -9 5.12 0.7
 -5 -12 9 6.62 0.73
 5 12 -9 5.85 0.8
 5 12 -9 6.08 0.88
 -4 -12 9 66.94 2.5
 4 -12 -9 65.31 2.5
 4 12 -9 69.74 2.6
 4 12 -9 66.58 2.75
 -4 12 9 72.15 2.61
 3 -12 -9 12.16 0.9
 -3 -12 9 11.62 0.9
 3 12 -9 9.06 0.89
 3 12 -9 10.55 1.09
 -3 12 9 10.12 0.94
 -2 -12 9 69.83 2.64
 2 -12 -9 75.82 2.69
 -2 12 9 72.22 2.74
 2 12 -9 71.66 2.88
 2 12 -9 76.16 2.76
 1 -12 -9 5.45 0.72
 -1 -12 9 4.4 0.68
 1 12 -9 6.04 0.82
 1 12 -9 4.12 0.79
 -1 12 9 3.58 0.7
 0 -12 9 89.34 3.21
 0 -12 -9 94.47 3.25
 0 12 -9 92.79 3.3
 0 12 -9 93.53 3.45
 0 12 9 94.2 3.33
 -1 -12 -9 0.8 0.46
 1 -12 9 0.41 0.39
 -1 12 -9 0.21 0.52
 1 12 9 0.43 0.53
 -1 12 -9 -0.51 0.44
 -2 -12 -9 69.8 2.62
 2 -12 9 64 2.56
 -2 12 -9 66.85 2.75
 2 12 9 71.26 2.69
 -2 12 -9 69.79 2.67
 -3 -12 -9 1.67 0.51
 3 -12 9 2.69 0.62
 3 12 9 1.94 0.6
 -3 12 -9 2.2 0.64
 -3 12 -9 2.55 0.63
 -4 -12 -9 29.96 1.6
 4 -12 9 30.53 1.58
 -4 12 -9 26.85 1.58
 -4 12 -9 32.91 1.8
 4 12 9 28.35 1.65
 -5 -12 -9 1.44 0.57
 5 -12 9 4.52 0.74
 5 12 9 3.23 0.77
 -5 12 -9 3.87 0.82
 -5 12 -9 4.43 0.79
 -6 -12 -9 13.38 1.21
 6 -12 9 13.67 1.2
 -6 12 -9 13.46 1.34
 6 12 9 12.3 1.27
 13 13 -9 1.1 0.61
 12 -13 -9 34.94 1.52
 12 13 -9 30.6 1.67
 11 -13 -9 2.15 0.51
 11 13 -9 1.03 0.58
 10 -13 -9 87.9 2.96
 10 13 -9 81.15 3.06
 9 -13 -9 0.06 0.36
 9 13 -9 -0.3 0.49
 8 -13 -9 127.8 3.96
 8 13 -9 113.51 4.03
 -7 -13 9 -0.06 0.36
 7 -13 -9 0 0.37
 7 13 -9 0.18 0.52
 6 -13 -9 52.05 2.15
 -6 -13 9 57.06 2.2
 6 13 -9 51.71 2.24
 5 -13 -9 0.2 0.37
 -5 -13 9 0.63 0.42
 5 13 -9 0.9 0.55
 -4 -13 9 26.55 1.39
 4 -13 -9 23.94 1.37
 4 13 -9 23.28 1.45
 -4 13 9 22.88 1.43
 4 13 -9 27.97 1.65
 3 -13 -9 0.7 0.41
 -3 -13 9 0.23 0.37
 3 13 -9 0.82 0.53
 -3 13 9 0.32 0.51
 3 13 -9 0.53 0.55
 2 -13 -9 5.93 0.77
 -2 -13 9 9.5 0.94
 2 13 -9 5.51 0.9
 2 13 -9 7.97 0.96
 -2 13 9 7.42 0.94
 -1 -13 9 0.79 0.43
 1 -13 -9 1.56 0.52
 -1 13 9 0.8 0.58
 1 13 -9 1.11 0.5
 1 13 -9 0.82 0.59
 0 -13 -9 0.06 0.37
 0 -13 9 0.33 0.38
 0 13 -9 -0.8 0.41
 0 13 -9 -0.52 0.5
 0 13 9 0.14 0.49
 1 -13 9 3.32 0.64
 -1 -13 -9 3.15 0.62
 1 13 9 3.33 0.76
 -1 13 -9 3.14 0.78
 -1 13 -9 3.75 0.73
 2 -13 9 13.22 1.17
 -2 -13 -9 12.32 1.15
 -2 13 -9 13.28 1.37
 -2 13 -9 13.2 1.2
 2 13 9 12.38 1.23
 3 -13 9 0.27 0.45
 -3 -13 -9 0.42 0.5
 -3 13 -9 0.3 0.59
 -3 13 -9 0.54 0.5
 3 13 9 0.03 0.58
 4 -13 9 23.43 1.43
 -4 -13 -9 22.72 1.4
 -4 13 -9 20.34 1.57
 -4 13 -9 21.82 1.48
 4 13 9 22.88 1.5
 5 -13 9 0.97 0.53
 -5 -13 -9 -0.42 0.48
 5 13 9 -0.67 0.59
 -5 13 -9 -0.2 0.59
 -5 13 -9 -0.3 0.55
 12 -14 -9 35.24 1.57
 12 14 -9 29.75 1.73
 11 -14 -9 5.6 0.68
 11 14 -9 3.79 0.79
 10 -14 -9 10.12 0.92
 10 14 -9 7.5 0.99
 9 -14 -9 5.34 0.71
 9 14 -9 3.71 0.79
 8 -14 -9 0.61 0.42
 8 14 -9 0.89 0.61
 7 -14 -9 4.71 0.67
 7 14 -9 4.83 0.82
 6 -14 -9 17.97 1.18
 -6 -14 9 18.56 1.22
 6 14 -9 18.25 1.34
 5 -14 -9 5.57 0.77
 -5 -14 9 6.19 0.79
 5 14 -9 3.3 0.71
 4 -14 -9 43.99 2.03
 -4 -14 9 48.3 2.06
 4 14 -9 47 2.3
 4 14 -9 47.15 2.17
 3 -14 -9 7 0.85
 -3 -14 9 7.13 0.84
 3 14 -9 6.82 0.89
 -3 14 9 7.59 0.95
 3 14 -9 8.02 1.09
 -2 -14 9 73.39 2.81
 2 -14 -9 69.37 2.78
 -2 14 9 76.64 2.92
 2 14 -9 72.92 2.89
 2 14 -9 66.31 2.98
 1 -14 -9 1.93 0.61
 -1 -14 9 2.23 0.56
 1 14 -9 3.77 0.83
 1 14 -9 2.77 0.7
 -1 14 9 3.08 0.75
 0 -14 9 72.66 2.86
 0 -14 -9 74.94 2.9
 0 14 -9 70.99 2.93
 0 14 -9 70.22 3.08
 0 14 9 76.96 3.01
 1 -14 9 1.17 0.54
 -1 -14 -9 0.64 0.5
 -1 14 -9 1.27 0.64
 1 14 9 0.42 0.62
 -1 14 -9 0.76 0.67
 2 -14 9 44.45 2.1
 -2 -14 -9 46.93 2.16
 -2 14 -9 44.1 2.36
 2 14 9 45.76 2.27
 -2 14 -9 50.33 2.24
 -3 -14 -9 0.56 0.47
 3 -14 9 0.86 0.54
 -3 14 -9 0.35 0.63
 3 14 9 -0.02 0.62
 -3 14 -9 0.46 0.67
 4 -14 9 20.75 1.42
 -4 -14 -9 17.32 1.46
 4 14 9 18.78 1.63
 -4 14 -9 19.96 1.43
 -4 14 -9 20.81 1.57
 11 -15 -9 0.52 0.43
 11 15 -9 -0.54 0.57
 10 -15 -9 92.97 3.1
 10 15 -9 77.66 3.21
 9 -15 -9 0.43 0.44
 9 15 -9 0.24 0.6
 8 -15 -9 88.91 3.05
 8 15 -9 79.4 3.21
 7 -15 -9 0.78 0.45
 7 15 -9 0.12 0.59
 6 -15 -9 69.06 2.68
 -6 -15 9 70.33 2.76
 6 15 -9 70.55 2.88
 5 -15 -9 0.74 0.47
 -5 -15 9 0.14 0.39
 5 15 -9 0.19 0.6
 -4 -15 9 38.05 1.86
 4 -15 -9 36.05 1.83
 4 15 -9 34.38 1.92
 3 -15 -9 2.32 0.61
 -3 -15 9 3.77 0.74
 3 15 -9 2.7 0.81
 3 15 -9 2.67 0.81
 -3 15 9 2.86 0.79
 2 -15 -9 5.06 0.83
 -2 -15 9 5.87 0.82
 2 15 -9 5.01 0.96
 -2 15 9 5.45 0.88
 2 15 -9 3.57 0.84
 -1 -15 9 3.98 0.76
 1 -15 -9 3.8 0.73
 1 15 -9 4.59 0.91
 1 15 -9 3.99 0.94
 -1 15 9 2.85 0.81
 0 -15 9 1.66 0.58
 0 -15 -9 2.14 0.69
 0 15 9 2.36 0.79
 0 15 -9 2.13 0.8
 0 15 -9 1.75 0.68
 1 -15 9 3.35 0.72
 -1 -15 -9 3.66 0.79
 -1 15 -9 2.07 0.74
 1 15 9 5.27 0.95
 -1 15 -9 3.36 0.92
 2 -15 9 6.85 0.92
 -2 -15 -9 10.5 1.19
 -2 15 -9 7.3 1.01
 -2 15 -9 7.32 1.19
 2 15 9 10.02 1.28
 8 -16 -9 0.88 0.5
 8 16 -9 1.01 0.67
 7 -16 -9 14.59 1.11
 7 16 -9 11.2 1.26
 6 -16 -9 20.83 1.33
 -6 -16 9 19.96 1.38
 6 16 -9 17.18 1.52
 -5 -16 9 5.12 0.81
 5 -16 -9 6.81 0.88
 5 16 -9 6.32 0.95
 4 -16 -9 40.31 1.99
 -4 -16 9 43.71 2.07
 4 16 -9 39.09 2.15
 -3 -16 9 8.43 1.04
 3 -16 -9 4.68 0.81
 3 16 -9 7.05 1.11
 3 16 -9 6.86 1.15
 -2 -16 9 67.07 2.86
 2 -16 -9 71.18 2.91
 2 16 -9 66.16 2.97
 -2 16 9 70.3 3
 2 16 -9 76.71 3.25
 -1 -16 9 -0.3 0.41
 1 -16 -9 -0.02 0.53
 -1 16 9 1.22 0.77
 1 16 -9 0.33 0.59
 1 16 -9 0.46 0.74
 0 -16 -9 55.87 2.56
 0 -16 9 54.38 2.53
 0 16 -9 55.87 2.65
 0 16 -9 53.9 2.79
 0 16 9 58.17 2.68
 19 0 -10 -0.1 0.56
 19 0 -10 0.43 1.04
 18 0 -10 75.1 2.97
 18 0 -10 68.33 3.77
 17 0 -10 -0.04 0.47
 17 0 -10 0.05 0.97
 16 0 -10 131.9 5.46
 16 0 -10 142.09 4.6
 15 0 -10 0.72 0.8
 15 0 -10 -0.65 0.36
 14 0 -10 187.27 5.56
 14 0 -10 165.06 6.26
 13 0 -10 0.44 0.62
 13 0 -10 0.13 0.39
 12 0 -10 110.84 4.44
 12 0 -10 121.03 3.85
 11 0 -10 -0.61 0.32
 11 0 -10 0.05 0.59
 10 0 -10 27.26 1.37
 10 0 -10 26.48 0.84
 10 0 -10 23.9 1.68
 9 0 -10 0.08 0.11
 9 0 -10 0.01 0.41
 8 0 -10 11.78 0.51
 8 0 -10 14.75 1.24
 7 0 -10 0.13 0.13
 -7 0 10 0 0.11
 -6 0 10 2.76 0.28
 6 0 -10 2.26 0.26
 -5 0 10 -0.01 0.12
 5 0 -10 -0.09 0.14
 4 0 -10 5.9 0.41
 -4 0 10 5.83 0.4
 -3 0 10 0 0.14
 3 0 -10 0.07 0.16
 -2 0 10 105.99 3.18
 2 0 -10 108.86 3.19
 -1 0 10 0.01 0.18
 1 0 -10 0.06 0.17
 0 0 -10 104.54 3.14
 0 0 10 102.69 3.13
 1 0 10 -0.1 0.17
 -1 0 -10 0.02 0.19
 -2 0 -10 205.73 6.01
 2 0 10 214.18 6.02
 3 0 10 -0.17 0.19
 -3 0 -10 -0.2 0.2
 -4 0 -10 173.78 5.15
 4 0 10 176.57 5.16
 -5 0 -10 0.02 0.23
 5 0 10 0.06 0.26
 -6 0 -10 94.83 3.09
 6 0 10 95.26 3.09
 7 0 10 0.13 0.33
 -7 0 -10 -0.23 0.27
 8 0 10 34.89 1.54
 9 0 10 0.15 0.35
 10 0 10 0.21 0.39
 19 -1 -10 1.19 1.07
 19 -1 -10 0.78 0.64
 19 1 -10 0.62 0.62
 18 -1 -10 44.45 2.16
 18 -1 -10 39.84 2.91
 18 1 -10 43.07 2.94
 18 1 -10 44.95 2.19
 17 -1 -10 -0.37 0.92
 17 -1 -10 -0.44 0.49
 17 1 -10 -0.51 0.87
 17 1 -10 -0.57 0.49
 16 -1 -10 8.03 1.47
 16 -1 -10 8.37 0.97
 16 1 -10 8.5 0.95
 16 1 -10 7.86 1.5
 15 -1 -10 0.46 0.81
 15 -1 -10 0.2 0.46
 15 1 -10 0.01 0.44
 15 1 -10 0.08 0.71
 14 -1 -10 6.65 1.28
 14 -1 -10 4.9 0.68
 14 1 -10 3.79 1
 14 1 -10 3.97 0.63
 13 -1 -10 -0.22 0.38
 13 -1 -10 -0.44 0.6
 13 1 -10 0.66 0.41
 13 1 -10 0.22 0.68
 12 -1 -10 34.14 2.12
 12 -1 -10 35.14 1.6
 12 1 -10 30.85 2.07
 12 1 -10 32.77 1.53
 11 -1 -10 -0.14 0.47
 11 -1 -10 0.02 0.08
 11 -1 -10 -0.05 0.35
 11 1 -10 0.23 0.1
 11 1 -10 -0.08 0.5
 11 1 -10 0.53 0.35
 10 -1 -10 82.65 3.36
 10 1 -10 73.65 3.26
 10 1 -10 84.57 2.34
 10 1 -10 87.31 2.91
 9 -1 -10 0.07 0.43
 9 -1 -10 0.13 0.11
 9 1 -10 0.13 0.49
 9 1 -10 0.53 0.14
 9 1 -10 0.6 0.36
 8 -1 -10 78.08 3.2
 8 -1 -10 88.58 2.38
 8 1 -10 83.89 2.38
 8 1 -10 72.37 3.16
 7 -1 -10 4.15 0.3
 -7 -1 10 4.88 0.31
 7 1 -10 4.43 0.32
 -7 1 10 4.23 0.31
 6 -1 -10 140.31 3.92
 -6 -1 10 139.13 3.92
 6 1 -10 136.18 3.92
 -6 1 10 139.99 3.93
 5 -1 -10 0.12 0.15
 -5 -1 10 0.11 0.13
 5 1 -10 0.01 0.15
 -5 1 10 0.3 0.14
 4 -1 -10 133.97 3.88
 -4 -1 10 137.57 3.89
 -4 1 10 136.33 3.88
 4 1 -10 134.6 3.89
 -3 -1 10 5 0.39
 3 -1 -10 4.99 0.39
 -3 1 10 5.4 0.38
 3 1 -10 4.73 0.4
 -2 -1 10 54 1.75
 2 -1 -10 52.88 1.75
 -2 1 10 54.08 1.75
 2 1 -10 53.44 1.76
 1 -1 -10 0.75 0.23
 -1 -1 10 0.05 0.18
 1 1 -10 0.51 0.23
 -1 1 10 0.43 0.19
 0 -1 10 18.48 0.84
 0 -1 -10 20.82 0.87
 0 1 10 17.76 0.83
 0 1 -10 17.76 0.84
 1 -1 10 0.94 0.28
 -1 -1 -10 1.19 0.3
 1 1 10 0.96 0.28
 -1 1 -10 1.45 0.31
 2 -1 10 0.64 0.29
 -2 -1 -10 0.43 0.27
 2 1 10 0.85 0.3
 -2 1 -10 0.8 0.32
 -3 -1 -10 0.24 0.24
 3 -1 10 -0.08 0.23
 3 1 10 0.39 0.26
 -3 1 -10 0.69 0.3
 4 -1 10 32.74 1.37
 -4 -1 -10 33.61 1.38
 4 1 10 34.85 1.39
 -4 1 -10 34.19 1.39
 -5 -1 -10 0.89 0.3
 5 -1 10 0.26 0.26
 -5 1 -10 1.01 0.32
 5 1 10 0.92 0.33
 -6 -1 -10 96.02 3.15
 6 -1 10 99.09 3.16
 -6 1 -10 96.4 3.14
 6 1 10 96.59 3.15
 7 -1 10 3.04 0.51
 -7 -1 -10 3.11 0.48
 7 1 10 3.47 0.53
 -7 1 -10 2.12 0.45
 8 -1 10 108.72 3.52
 8 1 10 107.59 3.53
 9 -1 10 0.05 0.34
 9 1 10 -0.48 0.32
 10 -1 10 107.26 3.61
 10 1 10 110.73 3.64
 19 -2 -10 1.26 0.71
 19 2 -10 0.24 0.61
 18 -2 -10 81.68 4.05
 18 -2 -10 83.52 3.22
 18 2 -10 80.04 4.04
 18 2 -10 83.88 3.27
 17 -2 -10 1.21 0.95
 17 -2 -10 1.82 0.63
 17 2 -10 3.59 1.21
 17 2 -10 1.89 0.68
 16 -2 -10 146.76 4.93
 16 -2 -10 147.88 5.83
 16 2 -10 159.1 5.03
 16 2 -10 154.81 5.86
 15 -2 -10 2.65 0.62
 15 -2 -10 0.88 0.76
 15 2 -10 2.07 0.99
 15 2 -10 2.04 0.61
 14 -2 -10 137.08 5.32
 14 -2 -10 140.05 4.56
 14 2 -10 141.6 4.57
 14 2 -10 146.84 5.43
 13 -2 -10 0.5 0.41
 13 -2 -10 -0.42 0.53
 13 2 -10 0.62 0.44
 13 2 -10 -0.04 0.59
 12 -2 -10 130.97 4.81
 12 -2 -10 132.14 4.16
 12 2 -10 121.74 3.52
 12 2 -10 120.62 4.73
 12 2 -10 134.27 4.13
 11 -2 -10 -0.2 0.53
 11 -2 -10 0.16 0.11
 11 -2 -10 0.37 0.38
 11 2 -10 0.3 0.36
 11 2 -10 -0.22 0.58
 11 2 -10 0.28 0.12
 10 -2 -10 44.73 2.21
 10 -2 -10 44.55 1.8
 10 -2 -10 42.08 1.24
 10 2 -10 40.75 1.72
 10 2 -10 33.83 2.04
 10 2 -10 40.76 1.26
 9 -2 -10 3.89 0.26
 9 -2 -10 3.2 0.74
 9 2 -10 1.56 0.6
 9 2 -10 4.41 0.62
 9 2 -10 2.99 0.26
 8 -2 -10 21.39 1.44
 8 2 -10 22.36 0.78
 8 2 -10 18.1 1.44
 -7 -2 10 0.24 0.13
 7 -2 -10 0.28 0.15
 7 2 -10 0.54 0.14
 7 2 -10 0.32 0.16
 -7 2 10 0.47 0.16
 6 -2 -10 5.95 0.39
 -6 -2 10 5.58 0.36
 -6 2 10 6.2 0.38
 6 2 -10 5.55 0.39
 5 -2 -10 0.66 0.19
 -5 -2 10 0.71 0.18
 -5 2 10 0.12 0.14
 5 2 -10 0.25 0.17
 4 -2 -10 52.27 1.65
 -4 -2 10 51.23 1.64
 4 2 -10 50.35 1.65
 -4 2 10 49.92 1.64
 3 -2 -10 3.05 0.32
 -3 -2 10 3.3 0.34
 3 2 -10 3.28 0.35
 -3 2 10 3.21 0.34
 2 -2 -10 65.47 2.09
 -2 -2 10 66.89 2.1
 -2 2 10 65.12 2.09
 2 2 -10 66.52 2.11
 1 -2 -10 5.63 0.48
 -1 -2 10 3.95 0.4
 -1 2 10 4.93 0.46
 1 2 -10 4.15 0.42
 0 -2 -10 175.41 5.11
 0 -2 10 178.33 5.12
 0 2 -10 179.09 5.13
 0 2 10 179.35 5.12
 1 -2 10 0.45 0.25
 -1 -2 -10 0.46 0.24
 1 2 10 0.95 0.28
 -1 2 -10 1.13 0.31
 -2 -2 -10 195.24 5.65
 2 -2 10 194.93 5.64
 2 2 10 194.87 5.65
 -2 2 -10 197.74 5.66
 3 -2 10 0.26 0.26
 -3 -2 -10 1.29 0.33
 3 2 10 0.9 0.32
 -3 2 -10 0.5 0.28
 4 -2 10 168.45 5.14
 -4 -2 -10 182.18 5.19
 4 2 10 170.49 5.16
 -4 2 -10 178.45 5.17
 -5 -2 -10 0.4 0.26
 5 -2 10 0.93 0.33
 5 2 10 0.5 0.28
 -5 2 -10 0.39 0.3
 -6 -2 -10 103.62 3.3
 6 -2 10 102.55 3.3
 6 2 10 99.27 3.3
 -6 2 -10 104.54 3.31
 7 -2 10 0.3 0.31
 -7 -2 -10 -0.32 0.28
 -7 2 -10 0.1 0.31
 7 2 10 -0.08 0.31
 8 -2 10 14.02 0.94
 8 2 10 13.82 0.95
 9 -2 10 -0.23 0.34
 9 2 10 -0.21 0.37
 10 -2 10 0.05 0.41
 10 2 10 0.82 0.48
 19 -3 -10 -0.5 0.58
 19 3 -10 1.34 0.74
 18 -3 -10 27.12 2.58
 18 -3 -10 25.77 1.58
 18 3 -10 26.89 1.7
 18 3 -10 29.32 2.42
 17 -3 -10 0.28 0.84
 17 -3 -10 1.29 0.55
 17 3 -10 1.97 0.65
 17 3 -10 1.72 1.05
 16 -3 -10 8.55 0.99
 16 -3 -10 3.61 1.08
 16 3 -10 6.11 1.27
 16 3 -10 5.36 0.83
 15 -3 -10 1.27 0.79
 15 -3 -10 1.34 0.56
 15 3 -10 1.03 0.56
 15 3 -10 0.49 0.85
 14 -3 -10 5.98 1.17
 14 -3 -10 6.13 0.77
 14 3 -10 5.71 1.17
 14 3 -10 6.54 0.8
 13 -3 -10 0.62 0.68
 13 -3 -10 0.24 0.42
 13 3 -10 0.09 0.38
 13 3 -10 0.03 0.71
 12 -3 -10 24.06 1.35
 12 -3 -10 23.94 1.7
 12 3 -10 26.63 1.34
 12 3 -10 27.22 1.9
 12 3 -10 24.97 0.81
 11 -3 -10 0.07 0.48
 11 -3 -10 0.35 0.39
 11 -3 -10 0.29 0.14
 11 3 -10 0.29 0.14
 11 3 -10 0.89 0.42
 11 3 -10 0.3 0.54
 10 -3 -10 84.91 3.3
 10 -3 -10 80.49 2.32
 10 3 -10 83.54 2.81
 10 3 -10 80.99 2.34
 10 3 -10 73.44 3.25
 9 -3 -10 0.51 0.15
 9 -3 -10 0.26 0.43
 9 3 -10 0.15 0.35
 9 3 -10 0.6 0.17
 9 3 -10 0.05 0.54
 8 -3 -10 130.48 4.37
 8 -3 -10 124.87 3.48
 8 3 -10 108.36 4.29
 8 3 -10 126.06 3.51
 -7 -3 10 0.69 0.17
 7 -3 -10 1.06 0.2
 7 -3 -10 1 0.51
 -7 3 10 0.96 0.2
 7 3 -10 0.58 0.19
 7 3 -10 0.75 0.19
 -6 -3 10 101.84 2.96
 6 3 -10 101.18 2.97
 -6 3 10 100.5 2.96
 -5 -3 10 0.13 0.15
 5 -3 -10 0.19 0.17
 5 3 -10 0.05 0.17
 -5 3 10 -0.09 0.14
 -4 -3 10 78.59 2.38
 4 -3 -10 76.54 2.36
 4 3 -10 78.03 2.39
 -4 3 10 77.38 2.38
 3 -3 -10 1.22 0.24
 -3 -3 10 1.19 0.23
 3 3 -10 1.27 0.25
 -3 3 10 0.92 0.21
 2 -3 -10 73.12 2.38
 -2 -3 10 78.3 2.4
 -2 3 10 74.96 2.39
 2 3 -10 80.46 2.42
 -1 -3 10 1.85 0.3
 1 -3 -10 1.41 0.28
 -1 3 10 1.63 0.3
 1 3 -10 1.35 0.3
 0 -3 -10 16.14 0.81
 0 -3 10 16.78 0.82
 0 3 -10 17.99 0.86
 0 3 10 16.2 0.82
 -1 -3 -10 0.31 0.22
 1 -3 10 -0.05 0.18
 1 3 10 0.22 0.22
 -1 3 -10 0.31 0.24
 2 -3 10 2.45 0.4
 -2 -3 -10 1.89 0.34
 2 3 10 1.68 0.34
 -2 3 -10 1.66 0.37
 -3 -3 -10 0.29 0.26
 3 -3 10 0.04 0.23
 -3 3 -10 -0.37 0.23
 3 3 10 0.03 0.25
 -4 -3 -10 32.49 1.34
 4 -3 10 32.6 1.35
 -4 3 -10 33.11 1.37
 4 3 10 30.36 1.32
 -5 -3 -10 3.21 0.46
 5 -3 10 5.3 0.57
 -5 3 -10 5.55 0.59
 5 3 10 4.04 0.51
 6 -3 10 77.7 2.63
 -6 -3 -10 76.96 2.64
 -6 3 -10 77.37 2.64
 6 3 10 77.59 2.66
 7 -3 10 2.79 0.49
 -7 3 -10 2.42 0.49
 7 3 10 1.78 0.47
 8 -3 10 95.27 3.21
 8 3 10 97.99 3.25
 9 -3 10 1.18 0.43
 9 3 10 0.79 0.44
 10 -3 10 97.65 3.3
 10 3 10 96.47 3.34
 19 -4 -10 -0.51 0.54
 19 4 -10 0.32 0.59
 18 -4 -10 74.48 3.89
 18 -4 -10 69.45 2.93
 18 4 -10 81.51 3.85
 18 4 -10 78.51 3.12
 17 -4 -10 -0.04 0.74
 17 -4 -10 0.11 0.47
 17 4 -10 1.21 0.98
 17 4 -10 -0.12 0.54
 16 -4 -10 107.17 4.55
 16 -4 -10 102.41 3.75
 16 4 -10 108.06 4.51
 16 4 -10 111.53 3.83
 15 -4 -10 2.62 0.9
 15 -4 -10 4.29 0.72
 15 4 -10 3.02 1.04
 15 4 -10 3.4 0.68
 14 -4 -10 101.57 3.6
 14 -4 -10 107.3 4.33
 14 4 -10 108.12 4.32
 14 4 -10 103.33 3.6
 13 -4 -10 3.11 0.61
 13 -4 -10 3.99 0.91
 13 4 -10 2.83 0.6
 13 4 -10 3.75 0.92
 12 -4 -10 112.31 4.17
 12 -4 -10 104.81 3.6
 12 4 -10 101.96 2.99
 12 4 -10 107.18 4.16
 12 4 -10 107.36 3.53
 11 -4 -10 0.6 0.19
 11 -4 -10 0.17 0.53
 11 4 -10 0.7 0.58
 11 4 -10 0.79 0.41
 11 4 -10 0.44 0.17
 10 -4 -10 60.35 2.61
 10 -4 -10 54.62 1.73
 10 4 -10 57.16 2.15
 10 4 -10 55.94 2.63
 10 4 -10 57.4 1.75
 9 -4 -10 0.76 0.18
 9 -4 -10 0.36 0.49
 9 4 -10 1.36 0.62
 9 4 -10 1.1 0.4
 9 4 -10 0.36 0.19
 8 -4 -10 7.41 0.43
 8 -4 -10 7.5 0.91
 8 4 -10 8.45 1.09
 8 4 -10 8.38 0.48
 -7 -4 10 1.21 0.22
 7 -4 -10 1.21 0.22
 7 -4 -10 1.49 0.5
 7 4 -10 1.09 0.27
 -7 4 10 1.57 0.39
 7 4 -10 0.93 0.23
 6 -4 -10 0.31 0.17
 -6 -4 10 0.38 0.18
 6 4 -10 0.59 0.22
 6 4 -10 0.61 0.2
 -6 4 10 0.45 0.19
 5 -4 -10 0.35 0.18
 -5 -4 10 0.47 0.19
 -5 4 10 0.27 0.18
 5 4 -10 0.49 0.21
 -4 -4 10 14.73 0.7
 4 4 -10 14.57 0.71
 -4 4 10 14.57 0.7
 -3 -4 10 5.05 0.46
 3 4 -10 5.67 0.5
 -3 4 10 5.65 0.49
 -2 -4 10 96.38 2.95
 2 4 -10 97.89 2.97
 -2 4 10 96.63 2.96
 1 -4 -10 6.62 0.54
 -1 -4 10 4.55 0.44
 1 4 -10 4.14 0.43
 -1 4 10 5.01 0.5
 0 -4 -10 140 4.07
 0 -4 10 137.62 4.06
 0 4 10 133.96 4.06
 0 4 -10 134.84 4.07
 1 -4 10 9.83 0.62
 -1 -4 -10 8.52 0.62
 1 4 10 9.88 0.67
 -1 4 -10 10.1 0.65
 -2 -4 -10 171.14 5.12
 2 -4 10 178.59 5.13
 -2 4 -10 179.65 5.15
 2 4 10 170.5 5.13
 3 -4 10 4.31 0.5
 -3 4 -10 4.67 0.52
 3 4 10 4.18 0.49
 4 -4 10 98.12 3.16
 -4 4 -10 97.96 3.17
 4 4 10 102.81 3.22
 5 -4 10 2.39 0.44
 5 4 10 1.56 0.39
 -5 4 -10 2.51 0.45
 6 -4 10 71.1 2.47
 -6 -4 -10 72.43 2.49
 6 4 10 70.76 2.51
 -6 4 -10 70.03 2.47
 7 -4 10 -0.28 0.27
 -7 -4 -10 0.14 0.3
 7 4 10 0.31 0.35
 -7 4 -10 0.21 0.3
 8 -4 10 18.89 1.09
 8 4 10 17.64 1.12
 9 -4 10 0.11 0.35
 9 4 10 0.07 0.41
 10 4 10 -0.59 0.4
 18 -5 -10 34.95 1.92
 18 -5 -10 39.61 2.73
 18 5 -10 33.07 1.93
 18 5 -10 35.11 2.5
 17 -5 -10 1.38 0.63
 17 -5 -10 0.16 0.89
 17 5 -10 1.71 0.89
 17 5 -10 1.44 0.66
 16 -5 -10 12.57 1.67
 16 -5 -10 8.89 0.96
 16 5 -10 11.89 1.54
 16 5 -10 12.14 1.18
 15 -5 -10 -0.31 0.42
 15 -5 -10 0.48 0.74
 15 5 -10 0.24 0.5
 15 5 -10 0.75 0.81
 14 -5 -10 1.36 0.78
 14 -5 -10 0.92 0.46
 14 5 -10 0.13 0.44
 14 5 -10 0.96 0.73
 13 -5 -10 2.26 0.6
 13 -5 -10 2.48 0.82
 13 5 -10 2.4 0.27
 13 5 -10 3.1 0.89
 13 5 -10 2.77 0.57
 12 -5 -10 29.56 1.88
 12 -5 -10 28.05 1.51
 12 5 -10 30.06 1.47
 12 5 -10 30.23 1.04
 12 5 -10 29.88 1.93
 11 -5 -10 3.16 0.34
 11 -5 -10 2.88 0.7
 11 5 -10 2.97 0.82
 11 5 -10 3.03 0.55
 11 5 -10 3.47 0.34
 10 -5 -10 72.69 2.2
 10 -5 -10 69.17 2.93
 10 5 -10 72.54 2.55
 10 5 -10 70.73 2.99
 10 5 -10 74.04 2.2
 9 -5 -10 -0.07 0.41
 9 -5 -10 -0.04 0.14
 9 5 -10 -0.04 0.5
 9 5 -10 0.35 0.21
 9 5 -10 -0.05 0.32
 8 -5 -10 95.6 2.81
 8 -5 -10 94.72 3.48
 8 5 -10 95 3.63
 8 5 -10 93.92 2.83
 7 -5 -10 0.34 0.43
 -7 -5 10 0.53 0.19
 7 -5 -10 0.37 0.18
 7 5 -10 0.06 0.25
 7 5 -10 0.38 0.22
 6 -5 -10 89.08 2.68
 -6 -5 10 89.28 2.68
 6 5 -10 88.54 2.69
 -6 5 10 87.08 2.68
 6 5 -10 89.15 2.74
 5 -5 -10 1.03 0.24
 -5 -5 10 1.1 0.23
 5 5 -10 0.55 0.23
 5 5 -10 0.66 0.25
 -5 5 10 0.74 0.23
 -4 -5 10 89.82 2.73
 4 -5 -10 92.01 2.73
 4 5 -10 86.2 2.73
 -4 5 10 88.28 2.74
 3 -5 -10 2.05 0.32
 -3 -5 10 1.55 0.29
 -3 5 10 2.32 0.36
 3 5 -10 1.37 0.3
 -2 -5 10 46.2 1.62
 2 -5 -10 44.18 1.6
 2 5 -10 46.24 1.64
 -2 5 10 47.75 1.65
 1 -5 -10 0.99 0.29
 -1 -5 10 0.62 0.24
 1 5 -10 0.78 0.27
 -1 5 10 1.24 0.31
 0 -5 10 19.95 0.92
 0 -5 -10 19.05 0.91
 0 5 10 19.18 0.93
 1 -5 10 4.46 0.5
 -1 -5 -10 4.49 0.5
 -1 5 -10 3.96 0.48
 1 5 10 5.08 0.57
 2 -5 10 10.86 0.72
 -2 -5 -10 10.98 0.7
 -2 5 -10 10.7 0.75
 2 5 10 11.67 0.77
 3 -5 10 0.96 0.29
 -3 -5 -10 0.54 0.31
 -3 5 -10 0.51 0.29
 3 5 10 0.79 0.36
 4 -5 10 10.5 0.75
 -4 -5 -10 11.15 0.78
 -4 5 -10 10.07 0.77
 4 5 10 11.21 0.8
 5 -5 10 9 0.78
 -5 -5 -10 7.09 0.68
 -5 5 -10 10.05 0.81
 5 5 10 8.82 0.77
 6 -5 10 64.03 2.32
 -6 -5 -10 67.88 2.38
 -6 5 -10 65.15 2.34
 6 5 10 64.95 2.38
 -7 -5 -10 5.23 0.68
 7 -5 10 4.1 0.59
 -7 5 -10 4.38 0.6
 7 5 10 5.54 0.71
 8 -5 10 87.88 3.07
 8 5 10 94.56 3.16
 9 -5 10 2.35 0.52
 9 5 10 2.41 0.58
 18 -6 -10 46.37 2.29
 18 -6 -10 53.65 3.08
 18 6 -10 47.44 2.34
 17 -6 -10 1.63 0.88
 17 -6 -10 0.97 0.58
 17 6 -10 -0.4 0.53
 17 6 -10 -0.73 0.84
 16 -6 -10 86.72 3.89
 16 -6 -10 81.91 3.21
 16 6 -10 89.39 3.28
 16 6 -10 86.99 3.75
 15 -6 -10 0.72 0.79
 15 -6 -10 1.23 0.59
 15 6 -10 2.4 0.63
 15 6 -10 1.29 0.85
 14 -6 -10 90.65 3.81
 14 -6 -10 94.5 3.33
 14 6 -10 84.85 3.2
 14 6 -10 92.26 3.75
 13 -6 -10 7.39 1.11
 13 -6 -10 4.62 0.73
 13 6 -10 6.99 1.14
 13 6 -10 5.84 0.74
 13 6 -10 6.51 0.45
 12 -6 -10 65.7 2.91
 12 6 -10 62.9 2.44
 12 6 -10 66.96 2.06
 12 6 -10 70.57 2.98
 11 -6 -10 7.88 1.07
 11 -6 -10 7.25 0.51
 11 6 -10 6.89 0.74
 11 6 -10 6.11 1.01
 11 6 -10 6.52 0.48
 10 -6 -10 43.4 1.49
 10 -6 -10 42.78 2.11
 10 6 -10 44.27 1.46
 10 6 -10 43.41 2.19
 10 6 -10 37.99 1.68
 9 -6 -10 5.43 0.43
 9 -6 -10 5 0.8
 9 6 -10 7.39 1.01
 9 6 -10 5.93 0.49
 9 6 -10 5.12 0.63
 8 -6 -10 12.48 1.06
 8 -6 -10 11.26 0.61
 8 6 -10 13.91 1.22
 8 6 -10 10.64 0.64
 7 -6 -10 0.83 0.44
 -7 -6 10 2.09 0.3
 7 -6 -10 2.13 0.3
 7 6 -10 1.15 0.37
 7 6 -10 2.08 0.33
 6 -6 -10 1.61 0.28
 6 -6 -10 2.17 0.52
 -6 -6 10 2.76 0.35
 6 6 -10 1.82 0.38
 6 6 -10 2.15 0.36
 -6 6 10 1.98 0.34
 5 -6 -10 1.41 0.28
 -5 -6 10 1.16 0.27
 5 6 -10 0.75 0.29
 -5 6 10 0.62 0.25
 5 6 -10 1.14 0.3
 4 -6 -10 13.22 0.71
 -4 -6 10 14.37 0.72
 4 6 -10 13.44 0.75
 4 6 -10 13.89 0.77
 -4 6 10 13.79 0.74
 3 -6 -10 7.12 0.53
 -3 -6 10 6.71 0.51
 -3 6 10 7.65 0.57
 3 6 -10 6.79 0.58
 -2 -6 10 94.24 2.95
 2 -6 -10 95.14 2.95
 -2 6 10 94.64 2.97
 2 6 -10 95.87 2.98
 -1 -6 10 7.03 0.54
 1 -6 -10 8.09 0.58
 -1 6 10 7.45 0.63
 1 6 -10 6.31 0.57
 0 -6 -10 111.48 3.4
 0 -6 10 111.72 3.39
 0 6 10 109.3 3.4
 0 6 -10 105.4 3.38
 1 -6 10 25.06 1.12
 -1 -6 -10 26 1.16
 -1 6 -10 24.8 1.14
 1 6 10 27.25 1.2
 2 -6 10 115.05 3.59
 -2 -6 -10 118.11 3.62
 -2 6 -10 116.28 3.62
 2 6 10 113.2 3.62
 3 -6 10 9.3 0.78
 -3 -6 -10 9.5 0.71
 3 6 10 8.96 0.76
 -3 6 -10 8.86 0.77
 4 -6 10 91.4 3.02
 -4 -6 -10 96.88 3.08
 4 6 10 89.89 3.06
 -4 6 -10 93.68 3.05
 -5 -6 -10 1.24 0.4
 5 -6 10 1.04 0.38
 5 6 10 1.92 0.47
 -5 6 -10 1.72 0.44
 -6 -6 -10 45.65 1.83
 6 -6 10 46.07 1.81
 6 6 10 43.69 1.82
 -6 6 -10 44.6 1.81
 -7 -6 -10 -0.25 0.32
 7 -6 10 0.16 0.34
 7 6 10 0.23 0.4
 8 -6 10 11.88 0.98
 8 6 10 11.87 1.03
 9 -6 10 0.02 0.37
 9 6 10 1.1 0.52
 18 -7 -10 16.47 1.31
 18 7 -10 14.65 1.4
 17 -7 -10 1.88 0.71
 17 -7 -10 1.39 0.93
 17 7 -10 2.68 0.73
 17 7 -10 1.86 0.96
 16 -7 -10 1.72 0.62
 16 -7 -10 1.55 0.89
 16 7 -10 1.52 0.64
 16 7 -10 0.95 0.84
 15 -7 -10 3.56 0.98
 15 -7 -10 2 0.64
 15 7 -10 0.54 0.79
 15 7 -10 1.87 0.61
 14 -7 -10 0.13 0.64
 14 -7 -10 0.35 0.51
 14 7 -10 0.27 0.25
 14 7 -10 0.35 0.66
 14 7 -10 -0.1 0.46
 13 -7 -10 0.96 0.68
 13 7 -10 0.87 0.47
 13 7 -10 1.28 0.69
 13 7 -10 1.27 0.3
 12 -7 -10 25.36 1.67
 12 7 -10 23.53 1.65
 12 7 -10 21.48 0.94
 12 7 -10 19.67 1.2
 11 -7 -10 0.42 0.24
 11 -7 -10 -0.31 0.42
 11 7 -10 -0.55 0.53
 11 7 -10 0.18 0.35
 11 7 -10 -0.46 0.22
 10 -7 -10 44.26 2.07
 10 -7 -10 38.36 1.49
 10 7 -10 43.89 2.12
 10 7 -10 40.6 1.67
 10 7 -10 41.22 1.48
 9 -7 -10 1.8 0.32
 9 -7 -10 2.27 0.61
 9 7 -10 1.36 0.31
 9 7 -10 1.85 0.62
 9 7 -10 1.45 0.44
 8 -7 -10 89.74 3.34
 8 -7 -10 91.11 2.83
 8 7 -10 93.12 2.86
 8 7 -10 94.31 3.5
 -7 -7 10 2.7 0.37
 7 -7 -10 2.68 0.57
 7 -7 -10 2.65 0.36
 7 7 -10 2.4 0.38
 7 7 -10 2.73 0.49
 -6 -7 10 90.83 2.77
 6 -7 -10 90.26 2.77
 6 -7 -10 89.21 3.24
 6 7 -10 88.47 2.79
 6 7 -10 88.11 2.93
 -6 7 10 87.51 2.78
 -5 -7 10 0.87 0.25
 5 -7 -10 0.76 0.26
 -5 7 10 0.5 0.27
 5 7 -10 0.68 0.3
 5 7 -10 0.73 0.32
 -4 -7 10 75.25 2.41
 4 -7 -10 76.67 2.43
 4 7 -10 73.5 2.5
 4 7 -10 73.94 2.44
 -4 7 10 74.68 2.44
 3 -7 -10 0.15 0.22
 -3 -7 10 0.3 0.24
 -3 7 10 0.98 0.32
 3 7 -10 0.12 0.28
 3 7 -10 0.84 0.31
 -2 -7 10 31.3 1.25
 2 -7 -10 29.3 1.25
 2 7 -10 31.47 1.28
 -2 7 10 30.15 1.28
 1 -7 -10 1.68 0.36
 -1 -7 10 2.31 0.38
 1 7 -10 1.64 0.39
 -1 7 10 2.13 0.41
 0 -7 -10 18.19 0.95
 0 -7 10 18.02 0.95
 0 7 -10 20.02 1.02
 0 7 10 20.56 1.01
 -1 -7 -10 0.36 0.27
 1 -7 10 0.01 0.23
 -1 7 -10 0.11 0.27
 1 7 10 0.13 0.32
 -2 -7 -10 1.74 0.38
 2 -7 10 1.81 0.39
 -2 7 -10 1.45 0.4
 2 7 10 1.13 0.39
 3 -7 10 8.45 0.74
 -3 -7 -10 6.85 0.67
 3 7 10 6.88 0.68
 -3 7 -10 6.78 0.69
 -4 -7 -10 13.91 0.9
 4 -7 10 12.97 0.86
 4 7 10 13.33 0.94
 -4 7 -10 11.06 0.87
 -5 -7 -10 7.12 0.74
 5 -7 10 6.92 0.71
 -5 7 -10 6.37 0.7
 5 7 10 7.92 0.8
 -6 -7 -10 48.08 1.92
 6 -7 10 46.06 1.86
 -6 7 -10 46.98 1.88
 6 7 10 44.58 1.91
 -7 -7 -10 2.38 0.52
 7 -7 10 3.78 0.59
 7 7 10 3.71 0.61
 8 -7 10 46.56 1.87
 8 7 10 40.23 1.9
 9 -7 10 3.74 0.64
 9 7 10 4.2 0.75
 17 -8 -10 -0.54 0.63
 17 -8 -10 0.29 0.6
 16 -8 -10 49.2 2.34
 16 -8 -10 57.32 2.89
 15 -8 -10 1.77 0.82
 15 8 -10 1.25 0.75
 14 -8 -10 58.44 2.81
 14 8 -10 58.53 1.94
 14 8 -10 56.98 2.66
 13 -8 -10 3.19 0.82
 13 8 -10 3.75 0.47
 13 8 -10 3.81 0.87
 12 -8 -10 72.13 3.01
 12 -8 -10 65.62 2.21
 12 8 -10 70.94 2.26
 12 8 -10 68.01 2.89
 11 -8 -10 9.1 0.63
 11 -8 -10 6.48 0.92
 11 8 -10 8.15 1.03
 11 8 -10 7.4 0.63
 10 -8 -10 38.04 1.96
 10 -8 -10 38.34 1.5
 10 8 -10 38.99 1.96
 10 8 -10 39.5 1.48
 9 -8 -10 0.69 0.29
 9 -8 -10 0.33 0.42
 9 8 -10 -0.01 0.26
 9 8 -10 0.96 0.56
 8 -8 -10 5.65 0.79
 8 -8 -10 6.49 0.57
 8 8 -10 5.03 0.53
 8 8 -10 6.24 0.89
 7 -8 -10 3.26 0.43
 7 -8 -10 3.83 0.65
 -7 -8 10 3.26 0.43
 7 8 -10 2.89 0.45
 7 8 -10 3.4 0.73
 7 8 -10 2.59 0.52
 6 -8 -10 0.66 0.4
 -6 -8 10 0.52 0.24
 6 -8 -10 0.82 0.28
 6 8 -10 1.64 0.45
 6 8 -10 0.63 0.3
 -5 -8 10 1.78 0.33
 5 -8 -10 1.56 0.33
 5 8 -10 0.97 0.31
 5 8 -10 1.83 0.44
 -5 8 10 1.35 0.36
 -4 -8 10 22.61 1.03
 4 -8 -10 22.3 1.03
 -4 8 10 22.96 1.09
 4 8 -10 22.38 1.16
 4 8 -10 22.24 1.07
 3 -8 -10 2.47 0.41
 -3 -8 10 2.03 0.37
 3 8 -10 2.28 0.44
 -3 8 10 1.78 0.41
 3 8 -10 1.36 0.4
 2 -8 -10 58.46 2.06
 -2 -8 10 59.77 2.05
 2 8 -10 54.99 2.06
 -2 8 10 60.08 2.1
 2 8 -10 58.37 2.15
 1 -8 -10 16.9 0.92
 -1 -8 10 16.89 0.92
 -1 8 10 17.78 0.98
 1 8 -10 16.03 1
 1 8 -10 17.31 0.97
 0 -8 10 62.27 2.24
 0 -8 -10 63.12 2.25
 0 8 10 67.41 2.32
 0 8 -10 64.53 2.28
 1 -8 10 13.13 0.85
 -1 -8 -10 12.77 0.85
 -1 8 -10 14.59 0.92
 1 8 10 14.39 0.93
 2 -8 10 108.52 3.51
 -2 -8 -10 112.39 3.54
 -2 8 -10 107.8 3.52
 2 8 10 111 3.56
 3 -8 10 16.05 0.97
 -3 -8 -10 16.72 1.01
 -3 8 -10 17.1 1.04
 3 8 10 17.9 1.08
 -4 -8 -10 54.63 2.04
 4 -8 10 51.64 2
 -4 8 -10 50.71 2
 4 8 10 51.08 2.04
 5 -8 10 2.17 0.48
 -5 -8 -10 2.44 0.51
 5 8 10 2.4 0.57
 -5 8 -10 1.83 0.5
 -6 -8 -10 29.94 1.44
 6 -8 10 26.67 1.35
 -6 8 -10 25.05 1.36
 6 8 10 28.79 1.48
 7 -8 10 0.27 0.37
 -7 -8 -10 0.08 0.36
 7 8 10 0.48 0.47
 8 -8 10 4.35 0.67
 8 8 10 5.13 0.81
 16 -9 -10 8.04 1.28
 15 -9 -10 4.1 0.94
 15 9 -10 2.82 0.66
 14 -9 -10 0.74 0.69
 14 9 -10 0.37 0.33
 13 -9 -10 -0.1 0.52
 13 9 -10 0 0.32
 12 -9 -10 10.51 0.7
 12 -9 -10 10.1 1.2
 12 9 -10 8.46 0.72
 11 -9 -10 0.7 0.52
 11 -9 -10 0.09 0.27
 11 9 -10 0.16 0.34
 11 9 -10 -0.66 0.54
 10 -9 -10 27.38 1.58
 10 -9 -10 26.22 1.2
 10 9 -10 26.36 1.57
 10 9 -10 27.05 1.22
 9 -9 -10 0.15 0.27
 9 -9 -10 0.45 0.4
 9 9 -10 0.16 0.31
 9 9 -10 0.54 0.49
 8 -9 -10 50.42 2.18
 8 -9 -10 51.38 1.86
 8 9 -10 50.81 2.23
 8 9 -10 50.3 1.87
 7 -9 -10 0.25 0.25
 7 -9 -10 0.39 0.37
 -7 -9 10 -0.22 0.22
 7 9 -10 0.07 0.37
 7 9 -10 0.09 0.32
 7 9 -10 0.33 0.49
 6 -9 -10 67.93 2.27
 -6 -9 10 65.75 2.25
 6 -9 -10 67.63 2.57
 6 9 -10 64.62 2.28
 6 9 -10 62.44 2.46
 5 -9 -10 1.86 0.39
 -5 -9 10 1.84 0.38
 5 -9 -10 1.93 0.51
 5 9 -10 2.13 0.44
 5 9 -10 2.01 0.5
 -5 9 10 2.19 0.46
 4 -9 -10 51.85 1.88
 -4 -9 10 51.03 1.87
 -4 9 10 49.66 1.9
 4 9 -10 49.33 1.9
 4 9 -10 52.78 2.04
 3 -9 -10 1.52 0.35
 -3 -9 10 1.29 0.33
 3 9 -10 1.25 0.36
 3 9 -10 0.44 0.37
 -3 9 10 1.05 0.38
 2 -9 -10 24.91 1.16
 -2 -9 10 24.3 1.15
 2 9 -10 24.65 1.27
 2 9 -10 24.61 1.21
 -2 9 10 23.08 1.18
 1 -9 -10 0.42 0.31
 -1 -9 10 0.96 0.35
 1 9 -10 0.45 0.38
 -1 9 10 0.68 0.4
 1 9 -10 0.93 0.4
 0 -9 -10 1.67 0.42
 0 -9 10 1.8 0.42
 0 9 -10 1.38 0.44
 0 9 10 1.84 0.48
 0 9 -10 1.69 0.49
 -1 -9 -10 0.29 0.33
 1 -9 10 -0.17 0.27
 1 9 10 0.23 0.38
 -1 9 -10 0.27 0.38
 2 -9 10 1.26 0.39
 -2 -9 -10 1.11 0.4
 -2 9 -10 1.14 0.41
 2 9 10 1.16 0.47
 -3 -9 -10 8.23 0.81
 3 -9 10 8.58 0.84
 -3 9 -10 7.16 0.8
 3 9 10 7.65 0.82
 4 -9 10 11.06 0.83
 -4 -9 -10 11.8 0.93
 -4 9 -10 9.8 0.87
 4 9 10 13.11 1.09
 5 -9 10 4.91 0.66
 -5 -9 -10 2.59 0.55
 -5 9 -10 4.05 0.63
 5 9 10 3.62 0.66
 -6 -9 -10 27.77 1.46
 6 -9 10 27.19 1.39
 -6 9 -10 25.18 1.4
 6 9 10 28.83 1.53
 -7 -9 -10 5.73 0.78
 7 -9 10 8.49 0.88
 7 9 10 6.99 0.9
 16 -10 -10 32.23 2.14
 15 -10 -10 2.89 0.87
 15 10 -10 1.62 0.44
 14 -10 -10 38.38 2.17
 14 10 -10 37.29 1.55
 13 -10 -10 1.76 0.71
 13 10 -10 2.71 0.5
 12 -10 -10 35.14 1.94
 12 -10 -10 35.4 1.43
 12 10 -10 34.23 1.49
 11 -10 -10 3.53 0.5
 11 -10 -10 3.71 0.76
 11 10 -10 3.25 0.54
 10 -10 -10 9.64 1.04
 10 -10 -10 8.29 0.73
 10 10 -10 8.54 0.78
 9 -10 -10 2.93 0.49
 9 -10 -10 3.1 0.64
 9 10 -10 2.17 0.49
 8 -10 -10 10.76 0.97
 8 -10 -10 9.53 0.74
 8 10 -10 11.05 0.85
 7 -10 -10 0.79 0.42
 -7 -10 10 0.85 0.32
 7 -10 -10 -0.16 0.27
 7 10 -10 0.09 0.37
 -6 -10 10 0.42 0.32
 6 -10 -10 0.83 0.33
 6 -10 -10 0.83 0.41
 6 10 -10 0.2 0.41
 6 10 -10 1.01 0.41
 -5 -10 10 2.18 0.43
 5 -10 -10 1.91 0.49
 5 -10 -10 1.97 0.42
 5 10 -10 2.01 0.55
 5 10 -10 1.99 0.48
 -5 10 10 2.18 0.48
 -4 -10 10 12.86 0.85
 4 -10 -10 14.76 0.99
 4 -10 -10 12.24 0.84
 -4 10 10 13.28 0.92
 4 10 -10 13.9 0.95
 4 10 -10 12.18 1.01
 -3 -10 10 7.75 0.72
 3 -10 -10 6.38 0.65
 3 10 -10 8.79 0.81
 3 10 -10 10.02 0.94
 -3 10 10 7.78 0.75
 2 -10 -10 36.12 1.51
 -2 -10 10 33.56 1.48
 2 10 -10 33.04 1.53
 2 10 -10 34.07 1.63
 -2 10 10 33.06 1.51
 1 -10 -10 10.22 0.86
 -1 -10 10 8.9 0.79
 1 10 -10 10.23 0.98
 1 10 -10 9.38 0.85
 -1 10 10 9.86 0.92
 0 -10 -10 45.46 1.88
 0 -10 10 50.83 1.92
 0 10 -10 47.28 1.93
 0 10 -10 48.35 2.04
 0 10 10 44.11 1.93
 1 -10 10 13.4 0.92
 -1 -10 -10 12.79 0.89
 1 10 10 13.42 0.97
 -1 10 -10 10.98 0.97
 -1 10 -10 13.74 1.07
 -2 -10 -10 41.5 1.77
 2 -10 10 40.76 1.74
 2 10 10 41.27 1.83
 -2 10 -10 39.16 1.77
 -2 10 -10 40.39 1.9
 3 -10 10 5.03 0.66
 -3 -10 -10 6.08 0.76
 3 10 10 6.24 0.83
 -3 10 -10 5.23 0.71
 -3 10 -10 4.78 0.77
 4 -10 10 39.35 1.74
 -4 -10 -10 39.09 1.77
 4 10 10 37.9 1.81
 -4 10 -10 38.16 1.76
 5 -10 10 5.97 0.75
 -5 -10 -10 5.38 0.73
 -5 10 -10 6.09 0.79
 5 10 10 5.55 0.8
 6 -10 10 17.17 1.14
 -6 -10 -10 16.37 1.18
 6 10 10 18.17 1.3
 7 -10 10 -0.23 0.38
 -7 -10 -10 -0.09 0.43
 7 10 10 -0.14 0.55
 15 -11 -10 -0.29 0.6
 15 11 -10 -0.25 0.38
 14 -11 -10 0.47 0.62
 14 11 -10 1.12 0.48
 13 -11 -10 0.15 0.56
 13 11 -10 0.22 0.41
 12 -11 -10 2.04 0.44
 12 -11 -10 2.76 0.73
 12 11 -10 1.55 0.51
 11 -11 -10 0.36 0.46
 11 -11 -10 0.22 0.32
 11 11 -10 0.73 0.44
 10 -11 -10 24.13 1.2
 10 -11 -10 22.41 1.45
 10 11 -10 22.99 1.25
 9 -11 -10 0.45 0.35
 9 -11 -10 0.24 0.39
 9 11 -10 -0.39 0.38
 8 -11 -10 24.66 1.28
 8 -11 -10 26.26 1.46
 8 11 -10 25.65 1.34
 7 -11 -10 0.98 0.38
 -7 -11 10 0.07 0.29
 7 -11 -10 0.81 0.41
 7 11 -10 -0.05 0.4
 -6 -11 10 52.75 2.02
 6 -11 -10 50.89 2.12
 6 -11 -10 53.12 2.05
 6 11 -10 51.82 2.07
 6 11 -10 55.11 2.29
 5 -11 -10 0.57 0.34
 -5 -11 10 0.95 0.34
 5 11 -10 0.73 0.43
 5 11 -10 0.54 0.49
 4 -11 -10 34.93 1.56
 -4 -11 10 35.76 1.55
 4 11 -10 36.63 1.61
 4 11 -10 36.24 1.77
 -4 11 10 34.06 1.61
 -3 -11 10 1.83 0.44
 3 -11 -10 2.15 0.49
 3 11 -10 1.89 0.52
 3 11 -10 2.38 0.61
 -3 11 10 1.94 0.54
 -2 -11 10 13.67 0.95
 2 -11 -10 15.66 1
 -2 11 10 13.27 1.05
 2 11 -10 15.17 1.07
 2 11 -10 14.86 1.14
 1 -11 -10 0.51 0.36
 -1 -11 10 0.52 0.38
 1 11 -10 0.16 0.43
 1 11 -10 0.26 0.43
 -1 11 10 0.46 0.42
 0 -11 -10 1.62 0.45
 0 -11 10 2.15 0.51
 0 11 -10 1.26 0.56
 0 11 -10 1.26 0.53
 0 11 10 1.13 0.49
 1 -11 10 0.57 0.42
 -1 -11 -10 0.44 0.41
 -1 11 -10 1.21 0.52
 1 11 10 0.73 0.53
 -1 11 -10 1.1 0.54
 2 -11 10 0.7 0.41
 -2 -11 -10 0.33 0.42
 -2 11 -10 0.43 0.47
 -2 11 -10 0.46 0.5
 2 11 10 0.2 0.47
 -3 -11 -10 2.36 0.56
 3 -11 10 2.8 0.59
 3 11 10 1.98 0.62
 -3 11 -10 2.86 0.62
 -3 11 -10 2.56 0.68
 -4 -11 -10 14.8 1.09
 4 -11 10 11.07 1.01
 -4 11 -10 10.4 1.02
 -4 11 -10 11.18 1.15
 4 11 10 13.91 1.23
 5 -11 10 11.08 1.05
 -5 -11 -10 11.07 1.07
 5 11 10 13.05 1.23
 -5 11 -10 9.65 1.18
 -5 11 -10 9.32 1.02
 -6 -11 -10 14.79 1.15
 6 -11 10 13.37 1.15
 6 11 10 10.27 1.1
 -6 11 -10 14.43 1.4
 14 12 -10 14.41 1.07
 13 12 -10 -0.29 0.43
 12 -12 -10 18.02 1.06
 12 12 -10 20.91 1.25
 11 -12 -10 0.67 0.38
 11 12 -10 -0.04 0.45
 10 12 -10 7.38 0.84
 9 -12 -10 0.32 0.36
 9 12 -10 -0.2 0.45
 8 -12 -10 2.82 0.55
 8 12 -10 2.56 0.6
 -7 -12 10 3.58 0.59
 7 -12 -10 5.41 0.71
 7 12 -10 4.08 0.68
 6 -12 -10 2.34 0.53
 -6 -12 10 1.46 0.46
 6 12 -10 2.37 0.63
 6 12 -10 1.3 0.56
 -5 -12 10 0.31 0.38
 5 -12 -10 0.65 0.39
 5 12 -10 0.84 0.55
 5 12 -10 0.43 0.46
 4 -12 -10 6.77 0.78
 -4 -12 10 6.46 0.74
 4 12 -10 7.45 0.96
 -4 12 10 7.39 0.88
 4 12 -10 5.99 0.76
 -3 -12 10 8.59 0.86
 3 -12 -10 8.08 0.87
 3 12 -10 6.97 0.94
 -3 12 10 9.48 0.96
 3 12 -10 7.52 0.87
 2 -12 -10 24.89 1.33
 -2 -12 10 22.63 1.29
 -2 12 10 24.7 1.41
 2 12 -10 22.61 1.47
 2 12 -10 21.76 1.36
 -1 -12 10 11.33 1.01
 1 -12 -10 7.54 0.82
 -1 12 10 9.42 0.96
 1 12 -10 8.08 0.98
 1 12 -10 8.41 0.96
 0 -12 -10 24.97 1.36
 0 -12 10 25.49 1.39
 0 12 10 25.78 1.45
 0 12 -10 24.59 1.55
 0 12 -10 26.08 1.48
 -1 -12 -10 6.81 0.85
 1 -12 10 8.59 0.89
 -1 12 -10 8.04 0.95
 1 12 10 9.52 1.05
 -1 12 -10 7.55 0.99
 2 -12 10 24.18 1.41
 -2 -12 -10 26.32 1.47
 2 12 10 25.33 1.54
 -2 12 -10 26.85 1.63
 -2 12 -10 26.62 1.53
 3 -12 10 4.43 0.72
 -3 -12 -10 7.05 0.89
 3 12 10 6.59 0.96
 -3 12 -10 6.08 0.89
 -3 12 -10 5.1 0.78
 -4 -12 -10 12.12 1.12
 4 -12 10 13.76 1.17
 4 12 10 11.31 1.15
 -4 12 -10 12.56 1.18
 -4 12 -10 11.78 1.22
 5 -12 10 1.3 0.5
 -5 -12 -10 0.66 0.54
 5 12 10 2.73 0.74
 -5 12 -10 0.69 0.64
 -5 12 -10 1.01 0.56
 13 13 -10 0.62 0.54
 12 -13 -10 1.69 0.48
 12 13 -10 1.23 0.6
 11 -13 -10 -0.15 0.36
 11 13 -10 -0.29 0.49
 10 -13 -10 7.88 0.77
 10 13 -10 6.37 0.86
 9 -13 -10 1.2 0.44
 9 13 -10 0.93 0.57
 8 -13 -10 17.89 1.14
 8 13 -10 18.57 1.27
 7 -13 -10 0.23 0.42
 7 13 -10 0.19 0.49
 -6 -13 10 16.78 1.12
 6 -13 -10 15.7 1.1
 6 13 -10 17.19 1.25
 5 -13 -10 3.28 0.62
 -5 -13 10 0.93 0.42
 5 13 -10 1.68 0.62
 5 13 -10 2.78 0.72
 -4 -13 10 12.98 1
 4 -13 -10 8.7 0.91
 4 13 -10 9.99 1.03
 4 13 -10 13.83 1.34
 -3 -13 10 -0.42 0.31
 3 -13 -10 -0.33 0.37
 3 13 -10 0.11 0.5
 -3 13 10 0.28 0.53
 3 13 -10 -0.34 0.5
 -2 -13 10 8.2 0.88
 2 -13 -10 7.67 0.89
 2 13 -10 5.4 0.8
 2 13 -10 8.25 1.06
 -2 13 10 6.55 0.92
 1 -13 -10 0.58 0.46
 -1 -13 10 1.1 0.49
 1 13 -10 1.19 0.61
 -1 13 10 0.66 0.56
 1 13 -10 0.44 0.56
 0 -13 -10 0.62 0.5
 0 -13 10 1.8 0.56
 0 13 -10 0.21 0.57
 0 13 -10 1.67 0.68
 0 13 10 0.44 0.55
 -1 -13 -10 1.2 0.51
 1 -13 10 0.39 0.48
 -1 13 -10 1.07 0.59
 1 13 10 0.66 0.61
 -1 13 -10 1.27 0.68
 -2 -13 -10 0.35 0.46
 2 -13 10 0.12 0.48
 -2 13 -10 0.33 0.59
 2 13 10 0.24 0.53
 -2 13 -10 -0.19 0.59
 3 -13 10 -0.02 0.44
 -3 -13 -10 0.21 0.48
 -3 13 -10 1.82 0.67
 3 13 10 0.9 0.66
 -3 13 -10 0.69 0.65
 -4 -13 -10 1.42 0.63
 4 -13 10 1.05 0.57
 -4 13 -10 0.69 0.67
 4 13 10 2.26 0.75
 -4 13 -10 1.98 0.69
 12 -14 -10 6.81 0.76
 12 14 -10 5.17 0.88
 11 -14 -10 1.24 0.47
 11 14 -10 0.22 0.58
 10 -14 -10 4.57 0.66
 10 14 -10 4.3 0.81
 9 -14 -10 0.28 0.39
 9 14 -10 0.27 0.57
 8 -14 -10 2.3 0.55
 8 14 -10 2.32 0.69
 7 -14 -10 0.35 0.43
 7 14 -10 -0.25 0.55
 6 -14 -10 0.08 0.4
 -6 -14 10 0.33 0.44
 6 14 -10 -0.05 0.58
 5 -14 -10 3.18 0.66
 -5 -14 10 1.82 0.53
 5 14 -10 1.16 0.57
 4 -14 -10 3.71 0.71
 -4 -14 10 2.68 0.61
 4 14 -10 2.74 0.79
 4 14 -10 2.95 0.74
 3 -14 -10 2.16 0.6
 -3 -14 10 2.78 0.62
 3 14 -10 3.86 0.87
 -3 14 10 3.16 0.74
 3 14 -10 3.62 0.8
 -2 -14 10 8.21 0.91
 2 -14 -10 8.68 0.98
 2 14 -10 9.1 1.15
 -2 14 10 8 0.99
 2 14 -10 8.23 1
 1 -14 -10 4.76 0.8
 -1 -14 10 6.39 0.91
 1 14 -10 3.59 0.8
 -1 14 10 5.85 0.99
 1 14 -10 4.72 0.89
 0 -14 10 9.06 1.03
 0 -14 -10 13.58 1.21
 0 14 -10 12.89 1.39
 0 14 -10 12.42 1.22
 0 14 10 14.26 1.35
 1 -14 10 3.71 0.7
 -1 -14 -10 4.86 0.82
 -1 14 -10 6.28 1.03
 1 14 10 4.97 0.95
 -1 14 -10 3.82 0.79
 -2 -14 -10 6.4 0.94
 2 -14 10 8.36 0.96
 2 14 10 7.22 1.1
 -2 14 -10 8.76 1.08
 -2 14 -10 7.28 1.09
 3 -14 10 2.29 0.66
 -3 -14 -10 1.3 0.64
 -3 14 -10 1.34 0.74
 3 14 10 1.74 0.79
 -3 14 -10 0.48 0.64
 10 -15 -10 3.33 0.63
 10 15 -10 3.61 0.83
 9 -15 -10 0.74 0.45
 9 15 -10 0.56 0.63
 8 -15 -10 4.83 0.73
 8 15 -10 4.44 0.86
 7 -15 -10 1.81 0.53
 7 15 -10 0.26 0.6
 6 -15 -10 5.4 0.76
 -6 -15 10 4.96 0.77
 6 15 -10 5.4 0.9
 -5 -15 10 1.27 0.54
 5 -15 -10 0.66 0.52
 5 15 -10 1.27 0.7
 4 -15 -10 5.51 0.84
 -4 -15 10 5 0.79
 4 15 -10 2.78 0.76
 4 15 -10 4.75 0.93
 -3 -15 10 0.73 0.51
 3 -15 -10 0.04 0.49
 3 15 -10 0.12 0.67
 3 15 -10 0.14 0.57
 2 -15 -10 1.21 0.59
 -2 -15 10 0.76 0.55
 2 15 -10 0.92 0.72
 2 15 -10 1.42 0.71
 -2 15 10 1.34 0.71
 -1 -15 10 -0.16 0.47
 1 -15 -10 0.34 0.54
 1 15 -10 0.46 0.67
 -1 15 10 0.7 0.67
 1 15 -10 -0.2 0.63
 0 -15 -10 -0.38 0.51
 0 -15 10 -0.63 0.43
 0 15 -10 0.01 0.61
 0 15 10 -0.54 0.61
 0 15 -10 0.27 0.64
 -1 -15 -10 -0.03 0.47
 1 -15 10 0.18 0.45
 1 15 10 -0.48 0.65
 -1 15 -10 0.62 0.61
 -1 15 -10 -0.33 0.68
 7 -16 -10 0.96 0.53
 7 16 -10 1.73 0.74
 6 -16 -10 -0.29 0.43
 -6 -16 10 0.19 0.49
 6 16 -10 -0.74 0.55
 -5 -16 10 0.44 0.53
 5 -16 -10 -0.07 0.49
 5 16 -10 1.28 0.73
 4 -16 -10 1.25 0.64
 -4 -16 10 0.43 0.5
 4 16 -10 1.26 0.72
 -3 -16 10 1.46 0.6
 3 -16 -10 2.5 0.73
 3 16 -10 2.55 0.86
 3 16 -10 3.35 0.94
 2 -16 -10 1.2 0.64
 -2 -16 10 1.67 0.66
 -2 16 10 2.97 0.88
 2 16 -10 1.99 0.86
 2 16 -10 1.57 0.78
 19 0 -11 0.48 0.66
 19 0 -11 -0.49 1.04
 18 0 -11 -0.59 0.47
 18 0 -11 1.1 0.99
 17 0 -11 0.73 0.56
 17 0 -11 0.83 0.94
 16 0 -11 0.09 0.51
 16 0 -11 0.22 0.92
 15 0 -11 -0.63 0.41
 15 0 -11 -0.67 0.67
 14 0 -11 0.21 0.42
 14 0 -11 0.4 0.69
 13 0 -11 0.94 0.76
 13 0 -11 1.38 0.51
 12 0 -11 0.48 0.68
 12 0 -11 0.03 0.4
 11 0 -11 0.58 0.6
 11 0 -11 0.85 0.14
 11 0 -11 0.26 0.43
 10 0 -11 -0.02 0.11
 10 0 -11 0.4 0.53
 9 0 -11 -0.15 0.43
 9 0 -11 0.05 0.13
 8 0 -11 0.07 0.45
 8 0 -11 -0.13 0.13
 -7 0 11 0.66 0.18
 7 0 -11 0.49 0.17
 6 0 -11 0.07 0.15
 -6 0 11 0.06 0.13
 5 0 -11 2.14 0.29
 -5 0 11 1.74 0.27
 -4 0 11 0.06 0.16
 4 0 -11 0.02 0.17
 3 0 -11 1.33 0.27
 -3 0 11 0.84 0.23
 2 0 -11 0 0.2
 -2 0 11 0.01 0.19
 -1 0 11 1.35 0.27
 1 0 -11 0.78 0.24
 0 0 11 0.05 0.22
 0 0 -11 0.02 0.23
 1 0 11 4.29 0.5
 -1 0 -11 4.43 0.5
 2 0 11 -0.11 0.23
 -2 0 -11 -0.29 0.19
 3 0 11 7.99 0.68
 -3 0 -11 8.57 0.67
 4 0 11 -0.33 0.21
 -4 0 -11 0.14 0.27
 5 0 11 4.28 0.53
 -5 0 -11 5.46 0.6
 -6 0 -11 0.03 0.3
 6 0 11 0.09 0.3
 -7 0 -11 10.68 0.91
 7 0 11 11.13 0.93
 8 0 11 -0.22 0.34
 9 0 11 1.1 0.46
 19 -1 -11 -0.44 0.61
 19 -1 -11 0.14 1.07
 19 1 -11 -0.56 0.61
 19 1 -11 0.76 1.05
 18 -1 -11 0.63 0.62
 18 -1 -11 1.09 1
 18 1 -11 0.38 1.05
 18 1 -11 0.02 0.56
 17 -1 -11 -0.03 0.54
 17 -1 -11 0.56 0.92
 17 1 -11 -0.72 0.83
 17 1 -11 0.74 0.58
 16 -1 -11 -0.36 0.49
 16 -1 -11 0.25 0.78
 16 1 -11 -0.35 0.85
 16 1 -11 0.18 0.53
 15 -1 -11 -0.17 0.8
 15 -1 -11 -0.31 0.44
 15 1 -11 -0.3 0.71
 15 1 -11 -0.28 0.39
 14 -1 -11 0.36 0.75
 14 -1 -11 0.19 0.46
 14 1 -11 -0.06 0.45
 14 1 -11 0.3 0.69
 13 -1 -11 -0.52 0.49
 13 -1 -11 -0.26 0.35
 13 1 -11 0.21 0.44
 13 1 -11 -0.26 0.65
 12 -1 -11 -0.12 0.43
 12 -1 -11 0.32 0.61
 12 1 -11 -0.1 0.63
 12 1 -11 -0.24 0.34
 11 -1 -11 0.51 0.53
 11 -1 -11 0.53 0.42
 11 -1 -11 0.05 0.1
 11 1 -11 0.53 0.14
 11 1 -11 0.53 0.44
 11 1 -11 -0.22 0.49
 10 -1 -11 1.27 0.61
 10 1 -11 1.49 0.19
 10 1 -11 1.76 0.64
 9 -1 -11 0.61 0.48
 9 -1 -11 0.61 0.17
 9 1 -11 0.47 0.53
 9 1 -11 0.35 0.15
 8 -1 -11 0.23 0.15
 8 -1 -11 -0.53 0.43
 8 1 -11 0.29 0.15
 7 -1 -11 2.62 0.28
 -7 -1 11 2.31 0.26
 -7 1 11 2.82 0.28
 7 1 -11 2.66 0.29
 -6 -1 11 1.3 0.22
 6 -1 -11 1.73 0.25
 -6 1 11 1.3 0.23
 6 1 -11 1.21 0.23
 5 -1 -11 2.34 0.3
 -5 -1 11 2.54 0.29
 5 1 -11 2.4 0.3
 -5 1 11 2.18 0.28
 -4 -1 11 0.43 0.18
 4 -1 -11 0.39 0.19
 4 1 -11 0.06 0.17
 -4 1 11 0.44 0.18
 3 -1 -11 2.32 0.33
 -3 -1 11 1.76 0.28
 3 1 -11 2.45 0.31
 -3 1 11 3.15 0.37
 -2 -1 11 -0.08 0.18
 2 -1 -11 0.08 0.2
 2 1 -11 0.13 0.21
 -2 1 11 -0.01 0.17
 1 -1 -11 1.92 0.34
 -1 -1 11 1.99 0.33
 -1 1 11 1.32 0.29
 1 1 -11 1.42 0.32
 0 -1 -11 1.15 0.29
 0 -1 11 1.59 0.33
 0 1 -11 1.24 0.32
 0 1 11 1.22 0.3
 1 -1 11 0.35 0.23
 -1 -1 -11 -0.14 0.21
 -1 1 -11 0.08 0.22
 1 1 11 0.39 0.27
 2 -1 11 0 0.24
 -2 -1 -11 -0.43 0.21
 2 1 11 0.12 0.25
 -2 1 -11 -0.23 0.23
 3 -1 11 -0.07 0.25
 -3 -1 -11 0.21 0.28
 -3 1 -11 0.35 0.29
 3 1 11 0.06 0.27
 -4 -1 -11 0.37 0.27
 4 -1 11 -0.05 0.27
 -4 1 -11 -0.02 0.27
 4 1 11 0.37 0.28
 5 -1 11 1.87 0.43
 -5 -1 -11 2.11 0.44
 5 1 11 1.89 0.44
 -5 1 -11 1.7 0.41
 6 -1 11 0.09 0.31
 -6 -1 -11 0.56 0.34
 6 1 11 0.04 0.32
 -6 1 -11 0.84 0.35
 -7 -1 -11 2.4 0.51
 7 -1 11 3.31 0.55
 -7 1 -11 4.26 0.57
 7 1 11 2.9 0.54
 8 -1 11 0.68 0.4
 8 1 11 0.62 0.42
 9 -1 11 7.05 0.8
 9 1 11 6.24 0.74
 19 -2 -11 0.98 1.02
 19 -2 -11 0.72 0.64
 19 2 -11 0.34 0.67
 19 2 -11 -0.3 1.15
 18 -2 -11 0.27 1.05
 18 -2 -11 1.32 0.68
 18 2 -11 0.78 1.11
 18 2 -11 1.93 0.76
 17 -2 -11 0.02 0.91
 17 -2 -11 0.16 0.47
 17 2 -11 -0.64 0.51
 17 2 -11 0.56 1.03
 16 -2 -11 3.4 1.17
 16 -2 -11 3.03 0.72
 16 2 -11 3.11 1.14
 16 2 -11 4.17 0.76
 15 -2 -11 -0.05 0.43
 15 -2 -11 0.2 0.72
 15 2 -11 -0.55 0.42
 15 2 -11 -0.09 0.87
 14 -2 -11 4.8 1.05
 14 -2 -11 6.33 0.8
 14 2 -11 5.95 0.81
 14 2 -11 6.56 1.25
 13 -2 -11 0.09 0.56
 13 -2 -11 1 0.5
 13 2 -11 0.78 0.8
 13 2 -11 0.53 0.48
 12 -2 -11 5.93 0.78
 12 -2 -11 7.23 1.14
 12 2 -11 7.06 0.34
 12 2 -11 5.92 1.12
 12 2 -11 7.35 0.83
 11 -2 -11 1.29 0.17
 11 -2 -11 0.98 0.57
 11 2 -11 0.6 0.58
 11 2 -11 1.45 0.49
 11 2 -11 1.53 0.19
 10 -2 -11 5.8 1
 10 -2 -11 6.39 0.35
 10 2 -11 6.35 0.37
 10 2 -11 5.2 0.92
 9 -2 -11 3.09 0.74
 9 2 -11 2.21 0.25
 9 2 -11 2.21 0.72
 8 -2 -11 3.95 0.33
 8 -2 -11 4.44 0.78
 8 2 -11 3.71 0.33
 7 -2 -11 0.47 0.18
 -7 -2 11 0.24 0.15
 7 2 -11 0.64 0.19
 -7 2 11 0.37 0.19
 6 -2 -11 0.31 0.17
 -6 -2 11 -0.01 0.13
 -6 2 11 0.03 0.16
 6 2 -11 0.16 0.18
 5 -2 -11 0.28 0.17
 -5 -2 11 0.19 0.16
 -5 2 11 0.28 0.18
 5 2 -11 0.11 0.18
 4 -2 -11 -0.13 0.16
 -4 -2 11 -0.04 0.16
 4 2 -11 0.3 0.21
 -4 2 11 0.1 0.18
 3 -2 -11 0.11 0.19
 -3 -2 11 0.32 0.18
 3 2 -11 -0.08 0.17
 -3 2 11 -0.1 0.18
 -2 -2 11 0.61 0.21
 2 -2 -11 0.61 0.23
 2 2 -11 0.63 0.23
 -2 2 11 0.49 0.23
 1 -2 -11 0.59 0.25
 -1 -2 11 1.73 0.31
 1 2 -11 1.62 0.34
 -1 2 11 1.4 0.32
 0 -2 -11 2.39 0.37
 0 -2 11 1.77 0.32
 0 2 -11 1.96 0.37
 0 2 11 2.22 0.37
 1 -2 11 4.05 0.48
 -1 -2 -11 3.79 0.48
 -1 2 -11 4.38 0.51
 1 2 11 3.03 0.44
 -2 -2 -11 2.96 0.42
 2 -2 11 2.69 0.43
 2 2 11 2.42 0.4
 -2 2 -11 2.86 0.44
 3 -2 11 7.22 0.65
 -3 -2 -11 5.57 0.61
 -3 2 -11 5.81 0.61
 3 2 11 6.65 0.64
 4 -2 11 3.84 0.49
 -4 -2 -11 4.35 0.55
 4 2 11 3.16 0.5
 -4 2 -11 3.55 0.5
 5 -2 11 8.03 0.75
 -5 -2 -11 7.19 0.7
 5 2 11 7.03 0.68
 -5 2 -11 8.06 0.75
 6 -2 11 1.98 0.44
 -6 -2 -11 2 0.45
 6 2 11 1.43 0.44
 -6 2 -11 1.93 0.46
 -7 -2 -11 0.9 0.4
 7 -2 11 0.73 0.37
 7 2 11 1.74 0.48
 -7 2 -11 0.74 0.37
 8 -2 11 0.85 0.42
 8 2 11 0.85 0.46
 9 -2 11 1.51 0.47
 9 2 11 2.09 0.57
 19 -3 -11 -0.9 0.98
 19 -3 -11 0.69 0.64
 19 3 -11 0.15 1.12
 19 3 -11 -0.77 0.57
 18 -3 -11 4.73 0.9
 18 -3 -11 5.58 1.44
 18 3 -11 4.58 0.89
 18 3 -11 8.29 1.6
 17 -3 -11 0.24 1
 17 -3 -11 1.04 0.59
 17 3 -11 0.18 1.04
 17 3 -11 -0.32 0.53
 16 -3 -11 3.54 0.75
 16 -3 -11 5.58 1.32
 16 3 -11 2.93 0.74
 16 3 -11 3.42 1.06
 15 -3 -11 0.47 0.73
 15 -3 -11 0.44 0.45
 15 3 -11 0.83 0.53
 15 3 -11 0.48 0.79
 14 -3 -11 0.84 0.46
 14 -3 -11 1.66 0.83
 14 3 -11 0.16 0.69
 14 3 -11 0.48 0.49
 13 -3 -11 -0.39 0.5
 13 -3 -11 -0.29 0.41
 13 3 -11 -0.79 0.63
 13 3 -11 0.24 0.44
 12 -3 -11 0.35 0.63
 12 -3 -11 0.36 0.37
 12 3 -11 0.44 0.65
 12 3 -11 0.26 0.14
 12 3 -11 0.4 0.43
 11 -3 -11 0.03 0.54
 11 -3 -11 -0.02 0.12
 11 3 -11 -1.03 0.48
 11 3 -11 0.12 0.4
 11 3 -11 0.09 0.14
 10 -3 -11 3.35 0.28
 10 -3 -11 3.02 0.73
 10 3 -11 3.22 0.3
 10 3 -11 2.51 0.58
 10 3 -11 3.23 0.83
 9 -3 -11 2.44 0.26
 9 -3 -11 3.19 0.77
 9 3 -11 1.97 0.26
 9 3 -11 0.93 0.6
 8 -3 -11 11.77 0.55
 8 -3 -11 10.59 1.14
 8 3 -11 11.19 0.56
 -7 -3 11 2.05 0.26
 7 3 -11 2.2 0.27
 7 3 -11 2.31 0.29
 6 -3 -11 10.42 0.55
 -6 -3 11 10.73 0.55
 6 3 -11 9.93 0.56
 -6 3 11 10.07 0.56
 5 -3 -11 4.63 0.42
 -5 -3 11 4.12 0.38
 -5 3 11 5.23 0.44
 5 3 -11 4.84 0.44
 4 -3 -11 10.74 0.59
 -4 -3 11 10.98 0.6
 4 3 -11 12.06 0.64
 -4 3 11 10.52 0.59
 -3 -3 11 2.21 0.33
 3 -3 -11 2.22 0.33
 3 3 -11 1.83 0.34
 -3 3 11 2.22 0.33
 2 -3 -11 6.97 0.52
 -2 -3 11 6.59 0.49
 2 3 -11 7.12 0.53
 -2 3 11 7.7 0.54
 -1 -3 11 2.33 0.37
 1 -3 -11 2.23 0.36
 1 3 -11 2.48 0.39
 -1 3 11 3.44 0.42
 0 -3 11 3.15 0.42
 0 -3 -11 3.26 0.44
 0 3 11 3.21 0.43
 0 3 -11 2.98 0.44
 1 -3 11 4.53 0.52
 -1 -3 -11 4.19 0.49
 1 3 11 4.91 0.52
 -1 3 -11 3.46 0.48
 -2 -3 -11 3.17 0.45
 2 -3 11 1.76 0.35
 2 3 11 3.29 0.47
 -2 3 -11 2.07 0.39
 -3 -3 -11 0.13 0.24
 3 -3 11 -0.08 0.25
 -3 3 -11 0.34 0.31
 3 3 11 0.03 0.25
 -4 -3 -11 -0.06 0.27
 4 -3 11 -0.14 0.23
 4 3 11 0.22 0.31
 -4 3 -11 -0.08 0.25
 5 -3 11 0.11 0.3
 -5 -3 -11 0.28 0.32
 5 3 11 0.23 0.34
 -5 3 -11 0.36 0.32
 -6 -3 -11 1.53 0.39
 6 -3 11 1.83 0.46
 6 3 11 1.14 0.4
 -6 3 -11 0.95 0.38
 7 -3 11 4.23 0.63
 -7 3 -11 4.6 0.63
 7 3 11 4.5 0.64
 8 -3 11 2.34 0.52
 8 3 11 3.4 0.62
 9 -3 11 4.77 0.69
 9 3 11 4.17 0.68
 18 -4 -11 6.22 0.93
 18 -4 -11 5.56 1.38
 18 4 -11 4.33 0.89
 18 4 -11 5.21 1.41
 17 -4 -11 1.33 0.99
 17 -4 -11 0.78 0.58
 17 4 -11 -0.64 0.89
 17 4 -11 0.57 0.6
 16 -4 -11 10.27 1.12
 16 -4 -11 10.66 1.6
 16 4 -11 9.78 1.44
[truncated: 131,921 more chars]
